# Supplementary material for: MRP8/14 is a Molecular Signature Triggered by Dopamine in HIV Latent Myeloid Targets that Increases HIV Transcription and Distinguishes HIV+ Methamphetamine Users with Detectable CSF Viral Load and Brain Pathology
Source: Preprints.org preprint supplement (doi:10.20944/preprints202305.0132.v1), 2023-05-03
Supplement: Supplementary file 1 [file supplementary]

## Sheet: Sheet1
Gene_symbol	D/C logFC	D/C P.Value	S/C logFC	S/C P.Value	P/C logFC	P/C P.Value	Phalanx_id	Description	Group	Entrez_gene	RefSeq	Protein_accession.version	Ensembl_gene	Ensembl_transcript	Ensembl_protein
2018-03-04	0.527089	0.120116	0.515469	0.129651	0.475564	0.0290362	PH_hs_0047837	Homo sapiens membrane-associated ring finger (C3HC4)	1	57574	NM_020814	NP_065865.1	ENSG00000144583	ENST00000273067	ENSP00000273067
2018-03-09	-0.090525	0.692129	0.0404845	0.654213	0.287625	0.0404642	PH_hs_0031286	Homo sapiens membrane-associated ring finger (C3HC4)	1	92979	NM_138396	NP_612405.2	ENSG00000139266	"ENST00000266643,ENST00000552279,ENST00000548358"	"ENSP00000266643,ENSP00000446758"
2018-09-03	-0.605111	0.0337305	-0.121458	0.880789	0.00370376	0.978414	PH_hs_0024057	Homo sapiens septin 3 (SEPT3)	1	55964	"NM_145733,NM_019106"	"NP_663786.2,NP_061979.3"	ENSG00000100167	"ENST00000449288,ENST00000396426,ENST00000406029,ENST00000396425,ENST00000396417,ENST00000460267"	"ENSP00000391416,ENSP00000379704,ENSP00000383956,ENSP00000379703,ENSP00000379695"
2018-09-08	-0.240188	0.131907	-0.306821	0.0262616	0.0798677	0.377278	PH_hs_0045977	Homo sapiens septin 8 (SEPT8)	1	23176	NM_001098811	NP_001092281.1	ENSG00000164402	"ENST00000378719,ENST00000481030,ENST00000378721,ENST00000296873,ENST00000378706,ENST00000378699,ENST00000378701,ENST00000458488,ENST00000371478,ENST00000453480,ENST00000414594,ENST00000371493,ENST00000481794,ENST00000492490,ENST00000448933,ENST00000620483"	"ENSP00000367991,ENSP00000367993,ENSP00000296873,ENSP00000367978,ENSP00000367971,ENSP00000367973,ENSP00000394766,ENSP00000407421,ENSP00000411823,ENSP00000360548,ENSP00000399840,ENSP00000483876"
A1BG	-0.405688	0.236041	-1.76273	0.0337208	-0.159934	0.758416	PH_hs_0042091	Homo sapiens alpha-1-B glycoprotein (A1BG)	1	1	NM_130786	NP_570602.2	ENSG00000121410	"ENST00000596924,ENST00000263100,ENST00000595014,ENST00000598345,ENST00000600966"	"ENSP00000263100,ENSP00000470909"
A1CF	-0.143874	0.60322	-0.431515	0.00583663	0.00429222	0.99153	PH_hs_0000888	Homo sapiens APOBEC1 complementation factor (A1CF)	1	29974	"NM_001198820,NM_001198819,NM_001198818,NM_138933,NM_138932,NM_014576"	"NP_001185749.1,NP_001185748.1,NP_001185747.1,NP_620311.1,NP_620310.1,NP_055391.2"	ENSG00000148584	"ENST00000374001,ENST00000373993,ENST00000373997,ENST00000373995,ENST00000493415,ENST00000473480,ENST00000414883,ENST00000395489,ENST00000282641,ENST00000395495"	"ENSP00000363113,ENSP00000363105,ENSP00000363109,ENSP00000363107,ENSP00000397953,ENSP00000378868,ENSP00000282641,ENSP00000378873"
A3GALT2	-0.0350353	0.877006	-0.686071	0.0085147	-0.257514	0.544409	PH_hs_0062652	"Homo sapiens alpha 1,3-galactosyltransferase 2 (A3GALT2)"	1	127550	NM_001080438	NP_001073907.1	ENSG00000184389	ENST00000442999	ENSP00000475261
AACSP1	0.32736	0.0964953	-0.482636	0.056505	-0.493354	0.027185	PH_hs_0033054	Homo sapiens acetoacetyl-CoA synthetase pseudogene 1 (AACSP1)	1	729522	NR_024035	-	NA	NA	NA
AADACL3	0.292783	0.0332805	0.486961	0.11139	0.480687	0.0532488	PH_hs_0040783	Homo sapiens arylacetamide deacetylase-like 3 (AADACL3)	1	126767	NM_001103170	NP_001096640.2	ENSG00000188984	"ENST00000620146,ENST00000359318"	ENSP00000352268
AADACL3	0.292783	0.0332805	0.486961	0.11139	0.480687	0.0532488	PH_hs_0040783	Homo sapiens arylacetamide deacetylase-like 3 (AADACL3)	1	126767	NM_001103170	NP_001096640.2	ENSG00000188984	"ENST00000620146,ENST00000359318"	ENSP00000352268
AARD	-0.152539	0.836556	-1.7573	0.0194181	-1.56855	0.032544	PH_hs_0042901	Homo sapiens alanine and arginine rich domain containing protein (AARD)	1	441376	NM_001025357	NP_001020528.1	ENSG00000205002	"ENST00000378279,ENST00000523536"	ENSP00000367528
AARD	-0.152539	0.836556	-1.7573	0.0194181	-1.56855	0.032544	PH_hs_0042901	Homo sapiens alanine and arginine rich domain containing protein (AARD)	1	441376	NM_001025357	NP_001020528.1	ENSG00000205002	"ENST00000378279,ENST00000523536"	ENSP00000367528
ABAT	-0.300069	0.0284355	-0.196968	0.224735	0.109987	0.349086	PH_hs_0014662	Homo sapiens 4-aminobutyrate aminotransferase (ABAT)	1	18	"NM_001127448,NM_000663,NM_020686"	"NP_001120920.1,NP_000654.2,NP_065737.2"	ENSG00000183044	"ENST00000268251,ENST00000564714,ENST00000563992,ENST00000568847,ENST00000561870,ENST00000569695,ENST00000566590,ENST00000563215,ENST00000565016,ENST00000567812,ENST00000425191,ENST00000569156,ENST00000562115,ENST00000565671,ENST00000564453,ENST00000396600"	"ENSP00000268251,ENSP00000456392,ENSP00000455184,ENSP00000456267,ENSP00000455198,ENSP00000454415,ENSP00000456330,ENSP00000411916,ENSP00000454963,ENSP00000455502,ENSP00000379845"
ABCA6	0.139231	0.640282	0.51837	0.0355179	0.405523	0.018216	PH_hs_0001457	"Homo sapiens ATP-binding cassette, sub-family A (ABC1)"	1	23460	NM_080284	NP_525023.2	ENSG00000154262	"ENST00000284425,ENST00000446604,ENST00000589482,ENST00000590311,ENST00000589803,ENST00000592493,ENST00000590645"	"ENSP00000284425,ENSP00000466862"
ABCA6	0.139231	0.640282	0.51837	0.0355179	0.405523	0.018216	PH_hs_0001457	"Homo sapiens ATP-binding cassette, sub-family A (ABC1)"	1	23460	NM_080284	NP_525023.2	ENSG00000154262	"ENST00000284425,ENST00000446604,ENST00000589482,ENST00000590311,ENST00000589803,ENST00000592493,ENST00000590645"	"ENSP00000284425,ENSP00000466862"
ABCB5	-0.661169	0.298087	-0.656355	0.401111	-1.42275	0.00444148	PH_hs_0046359	"Homo sapiens ATP-binding cassette, sub-family B (MDR/TAP)"	1	340273	NM_001163942	NP_001157414.1	ENSG00000004846	"ENST00000404938,ENST00000477094,ENST00000443026,ENST00000406935,ENST00000258738,ENST00000441315"	"ENSP00000384881,ENSP00000406730,ENSP00000383899,ENSP00000258738,ENSP00000398692"
ABCB9	-0.15237	0.864021	-2.48894	0.00316016	-0.287367	0.806232	PH_hs_0060354	"Homo sapiens ATP-binding cassette, sub-family B (MDR/TAP)"	1	23457	NM_203444	NP_982269.2	ENSG00000150967	"ENST00000344275,ENST00000442833,ENST00000280560,ENST00000540285,ENST00000392439,ENST00000542678,ENST00000546289,ENST00000426173,ENST00000537276,ENST00000542448,ENST00000538895,ENST00000541983,ENST00000545373,ENST00000540971,ENST00000536976,ENST00000546077,ENST00000541424,ENST00000543935,ENST00000622723,ENST00000442028,ENST00000346530"	"ENSP00000456813,ENSP00000456375,ENSP00000280560,ENSP00000441734,ENSP00000376234,ENSP00000440288,ENSP00000442281,ENSP00000415967,ENSP00000439871,ENSP00000440244,ENSP00000444834,ENSP00000441086,ENSP00000443433,ENSP00000443224,ENSP00000440138,ENSP00000443382,ENSP00000394898,ENSP00000280559"
ABCC12	-0.0027592	0.99475	-1.11047	0.00839769	-0.640037	0.338175	PH_hs_0024823	"Homo sapiens ATP-binding cassette, sub-family C (CFTR/MRP)"	1	94160	NM_033226	NP_150229.2	ENSG00000140798	"ENST00000311303,ENST00000534418,ENST00000529084,ENST00000497206,ENST00000532494,ENST00000529504,ENST00000532355,ENST00000526251,ENST00000533185,ENST00000528693,ENST00000533639,ENST00000527640"	"ENSP00000311030,ENSP00000431354,ENSP00000434510,ENSP00000431232,ENSP00000437047,ENSP00000433333,ENSP00000435715,ENSP00000436647"
ABCC13	0.183202	0.0764915	0.530754	0.0824694	0.610063	0.0357233	PH_hs_0045547	"Homo sapiens ATP-binding cassette, sub-family C (CFTR/MRP)"	1	150000	NR_003088	-	ENSG00000243064	"ENST00000429114,ENST00000482980,ENST00000481582,ENST00000467409,ENST00000471902,ENST00000463099"
ABCC3	-0.527351	0.0315519	0.295359	0.23539	0.769168	0.105267	PH_hs_0045886	"Homo sapiens ATP-binding cassette, sub-family C (CFTR/MRP)"	1	8714	NM_001144070	NP_001137542.1	ENSG00000108846	"ENST00000515707,ENST00000513511,ENST00000427699,ENST00000285238,ENST00000502426,ENST00000505699,ENST00000515585,ENST00000513589,ENST00000571855,ENST00000515070,ENST00000503304,ENST00000510633,ENST00000506464,ENST00000513745,ENST00000510891,ENST00000503337,ENST00000508929,ENST00000504586"	"ENSP00000422786,ENSP00000425697,ENSP00000395160,ENSP00000285238,ENSP00000427073,ENSP00000427521,ENSP00000424981,ENSP00000422058,ENSP00000421755"
ABCC6|ABCC6P2	0.0400543	0.96323	0.331686	0.298555	1.18147	0.0159638	PH_hs_0049706	"Homo sapiens ATP-binding cassette, sub-family C (CFTR/MRP)|Homo sapiens ATP-binding cassette, sub-family C, member 6 pseudogene 2 (ABCC6P2)"	4	368|730013	NM_001079528|NR_023387	NP_001072996.1|-	ENSG00000275331|ENSG00000273808	"ENST00000600761|ENST00000632364,ENST00000632973"	ENSP00000481979|
ABCD1	0.00447667	0.981863	0.431816	0.0263208	0.464072	0.052952	PH_hs_0009720	"Homo sapiens ATP-binding cassette, sub-family D (ALD)"	1	215	NM_000033	NP_000024.2	ENSG00000101986	"ENST00000218104,ENST00000370129,ENST00000443684"	"ENSP00000218104,ENSP00000359147"
ABCD1	0.00447667	0.981863	0.431816	0.0263208	0.464072	0.052952	PH_hs_0009720	"Homo sapiens ATP-binding cassette, sub-family D (ALD)"	1	215	NM_000033	NP_000024.2	ENSG00000101986	"ENST00000218104,ENST00000370129,ENST00000443684"	"ENSP00000218104,ENSP00000359147"
ABCD3	-0.216676	0.0480355	-0.0402831	0.632158	-0.331098	0.177551	PH_hs_0045821	"Homo sapiens ATP-binding cassette, sub-family D (ALD)"	1	5825	NM_001122674	NP_001116146.1	ENSG00000117528	"ENST00000370214,ENST00000315713,ENST00000468860,ENST00000493416,ENST00000484213,ENST00000464165"	"ENSP00000359233,ENSP00000326880"
ABCG2	-0.260681	0.491654	-0.438842	0.0143701	-0.174701	0.782682	PH_hs_0048874	"Homo sapiens ATP-binding cassette, sub-family G (WHITE)"	1	9429	"NM_004827,NM_001257386"	"NP_004818.2,NP_001244315.1"	ENSG00000118777	"ENST00000515655,ENST00000237612,ENST00000505480,ENST00000503830"	"ENSP00000426917,ENSP00000237612,ENSP00000426916,ENSP00000426934"
ABCG5	-0.200235	0.0689401	-0.399781	0.00819479	-0.399781	0.00647831	PH_hs_0007986	"Homo sapiens ATP-binding cassette, sub-family G (WHITE)"	1	64240	NM_022436	NP_071881.1	ENSG00000138075	"ENST00000260645,ENST00000486512,ENST00000405322,ENST00000409962"	"ENSP00000260645,ENSP00000430935,ENSP00000384513,ENSP00000386501"
ABCG5	-0.200235	0.0689401	-0.399781	0.00819479	-0.399781	0.00647831	PH_hs_0007986	"Homo sapiens ATP-binding cassette, sub-family G (WHITE)"	1	64240	NM_022436	NP_071881.1	ENSG00000138075	"ENST00000260645,ENST00000486512,ENST00000405322,ENST00000409962"	"ENSP00000260645,ENSP00000430935,ENSP00000384513,ENSP00000386501"
ABHD17A	-0.26647	0.047415	-0.0822698	0.492761	-0.0423094	0.649664	PH_hs_0062788	Homo sapiens abhydrolase domain containing 17A (ABHD17A)	1	81926	"NM_031213,NM_001130111"	"NP_112490.3,NP_001123583.1"	ENSG00000129968	"ENST00000292577,ENST00000250974,ENST00000588598,ENST00000591351,ENST00000590661,ENST00000592757"	"ENSP00000292577,ENSP00000250974,ENSP00000467638,ENSP00000466977"
ABHD3	0.0670154	0.687934	-0.316802	0.0529835	-0.27523	0.0935971	PH_hs_0026421	Homo sapiens abhydrolase domain containing 3 (ABHD3)	1	171586	NM_138340	NP_612213.2	ENSG00000158201	"ENST00000289119,ENST00000580981,ENST00000578270,ENST00000577564,ENST00000580477,ENST00000577891,ENST00000579875,ENST00000584464,ENST00000577928,ENST00000579982"	"ENSP00000289119,ENSP00000462935,ENSP00000462578,ENSP00000463996,ENSP00000463365,ENSP00000463848"
ABL2	-0.335978	0.0431917	-0.230453	0.299849	-0.440525	0.0323333	PH_hs_0027902	"Homo sapiens ABL proto-oncogene 2, non-receptor tyrosine kinase (ABL2)"	1	27	"NM_001168239,NM_001168238,NM_001168237,NM_001168236,NM_001136000,NM_005158,NM_007314"	"NP_001161711.1,NP_001161710.1,NP_001161709.1,NP_001161708.1,NP_001129472.1,NP_005149.4,NP_009298.1"	ENSG00000143322	"ENST00000502732,ENST00000344730,ENST00000512653,ENST00000504405,ENST00000367623,ENST00000507173,ENST00000511413,ENST00000392043,ENST00000509520,ENST00000504324,ENST00000508127"	"ENSP00000427562,ENSP00000339209,ENSP00000423578,ENSP00000426831,ENSP00000356595,ENSP00000423413,ENSP00000424697,ENSP00000375897"
ABL2	-0.335978	0.0431917	-0.230453	0.299849	-0.440525	0.0323333	PH_hs_0027902	"Homo sapiens ABL proto-oncogene 2, non-receptor tyrosine kinase (ABL2)"	1	27	"NM_001168239,NM_001168238,NM_001168237,NM_001168236,NM_001136000,NM_005158,NM_007314"	"NP_001161711.1,NP_001161710.1,NP_001161709.1,NP_001161708.1,NP_001129472.1,NP_005149.4,NP_009298.1"	ENSG00000143322	"ENST00000502732,ENST00000344730,ENST00000512653,ENST00000504405,ENST00000367623,ENST00000507173,ENST00000511413,ENST00000392043,ENST00000509520,ENST00000504324,ENST00000508127"	"ENSP00000427562,ENSP00000339209,ENSP00000423578,ENSP00000426831,ENSP00000356595,ENSP00000423413,ENSP00000424697,ENSP00000375897"
ABL2	0.0444987	0.813862	0.240414	0.0460414	0.088443	0.316212	PH_hs_0045671	"Homo sapiens ABL proto-oncogene 2, non-receptor tyrosine kinase (ABL2)"	1	27	NM_001136001	NP_001129473.1	ENSG00000143322	"ENST00000502732,ENST00000344730,ENST00000512653,ENST00000504405,ENST00000367623,ENST00000507173,ENST00000511413,ENST00000392043,ENST00000509520,ENST00000504324,ENST00000508127"	"ENSP00000427562,ENSP00000339209,ENSP00000423578,ENSP00000426831,ENSP00000356595,ENSP00000423413,ENSP00000424697,ENSP00000375897"
ABR	0.28266	0.17009	-0.19765	0.706017	-0.230289	0.028763	PH_hs_0025302	Homo sapiens active BCR-related (ABR)	1	29	"NM_021962,NM_001256847,NM_001159746,NM_001092"	"NP_068781.2,NP_001243776.1,NP_001153218.1,NP_001083.2"	ENSG00000159842	"ENST00000302538,ENST00000572585,ENST00000544583,ENST00000572441,ENST00000571797,ENST00000574437,ENST00000291107,ENST00000543210,ENST00000536794,ENST00000573559,ENST00000572650,ENST00000570688,ENST00000571120,ENST00000571383,ENST00000571022,ENST00000572152,ENST00000577052,ENST00000574257,ENST00000576668,ENST00000574875,ENST00000575770,ENST00000576964,ENST00000574544,ENST00000573895,ENST0000057194…	"ENSP00000303909,ENSP00000442048,ENSP00000459553,ENSP00000461795,ENSP00000461565,ENSP00000291107,ENSP00000445198,ENSP00000437429,ENSP00000460248,ENSP00000487388,ENSP00000458294,ENSP00000459118,ENSP00000459820,ENSP00000460770,ENSP00000461629,ENSP00000459761,ENSP00000459406"
ABTB1	0.281585	0.0781929	0.591393	0.0455352	0.625783	0.00355977	PH_hs_0005980	Homo sapiens ankyrin repeat and BTB (POZ)	1	80325	"NR_033429,NM_032548,NM_172027"	"-,NP_115937.1,NP_742024.1"	ENSG00000114626	"ENST00000483857,ENST00000232744,ENST00000475265,ENST00000493365,ENST00000453791,ENST00000475042,ENST00000466612,ENST00000479280,ENST00000467179,ENST00000468137,ENST00000464431,ENST00000491633,ENST00000478298,ENST00000474129,ENST00000497162"	"ENSP00000420748,ENSP00000232744,ENSP00000412684,ENSP00000418641,ENSP00000417366,ENSP00000418439"
ABTB1	0.281585	0.0781929	0.591393	0.0455352	0.625783	0.00355977	PH_hs_0005980	Homo sapiens ankyrin repeat and BTB (POZ)	1	80325	"NR_033429,NM_032548,NM_172027"	"-,NP_115937.1,NP_742024.1"	ENSG00000114626	"ENST00000483857,ENST00000232744,ENST00000475265,ENST00000493365,ENST00000453791,ENST00000475042,ENST00000466612,ENST00000479280,ENST00000467179,ENST00000468137,ENST00000464431,ENST00000491633,ENST00000478298,ENST00000474129,ENST00000497162"	"ENSP00000420748,ENSP00000232744,ENSP00000412684,ENSP00000418641,ENSP00000417366,ENSP00000418439"
ABTB2	-0.0156531	0.93469	0.0321141	0.703326	-0.315721	0.0103115	PH_hs_0024156	Homo sapiens ankyrin repeat and BTB (POZ)	1	25841	NM_145804	NP_665803.2	ENSG00000166016	"ENST00000435224,ENST00000530814"	ENSP00000410157
ACACB	0.156885	0.18345	0.432189	0.0289758	0.622278	0.0390381	PH_hs_0032249	Homo sapiens acetyl-CoA carboxylase beta (ACACB)	1	32	NM_001093	NP_001084.3	ENSG00000076555	"ENST00000338432,ENST00000539864,ENST00000546328,ENST00000544726,ENST00000543080,ENST00000544651,ENST00000538526,ENST00000542524,ENST00000534852,ENST00000537347,ENST00000536440,ENST00000396233,ENST00000537279,ENST00000377848,ENST00000377854"	"ENSP00000341044,ENSP00000443494,ENSP00000474680,ENSP00000443281,ENSP00000478488,ENSP00000367079,ENSP00000367085"
ACACB	0.156885	0.18345	0.432189	0.0289758	0.622278	0.0390381	PH_hs_0032249	Homo sapiens acetyl-CoA carboxylase beta (ACACB)	1	32	NM_001093	NP_001084.3	ENSG00000076555	"ENST00000338432,ENST00000539864,ENST00000546328,ENST00000544726,ENST00000543080,ENST00000544651,ENST00000538526,ENST00000542524,ENST00000534852,ENST00000537347,ENST00000536440,ENST00000396233,ENST00000537279,ENST00000377848,ENST00000377854"	"ENSP00000341044,ENSP00000443494,ENSP00000474680,ENSP00000443281,ENSP00000478488,ENSP00000367079,ENSP00000367085"
ACAN	-0.0247877	0.798446	0.614764	0.00396936	0.360223	0.0188729	PH_hs_0000285	Homo sapiens aggrecan (ACAN)	1	176	"NM_001135,NM_013227"	"NP_001126.3,NP_037359.3"	ENSG00000157766	"ENST00000558207,ENST00000559004,ENST00000352105,ENST00000561243,ENST00000560601,ENST00000558704,ENST00000558604,ENST00000439576,ENST00000617301"	"ENSP00000453003,ENSP00000453499,ENSP00000341615,ENSP00000453342,ENSP00000453581,ENSP00000452682,ENSP00000387356,ENSP00000484456"
ACAN	-0.0247877	0.798446	0.614764	0.00396936	0.360223	0.0188729	PH_hs_0000285	Homo sapiens aggrecan (ACAN)	1	176	"NM_001135,NM_013227"	"NP_001126.3,NP_037359.3"	ENSG00000157766	"ENST00000558207,ENST00000559004,ENST00000352105,ENST00000561243,ENST00000560601,ENST00000558704,ENST00000558604,ENST00000439576,ENST00000617301"	"ENSP00000453003,ENSP00000453499,ENSP00000341615,ENSP00000453342,ENSP00000453581,ENSP00000452682,ENSP00000387356,ENSP00000484456"
ACAP1	0.195196	0.182178	0.623633	0.0260527	0.556462	0.011008	PH_hs_0042311	"Homo sapiens ArfGAP with coiled-coil, ankyrin repeat and PH domains 1 (ACAP1)"	1	9744	NM_014716	NP_055531.1	ENSG00000072818	"ENST00000158762,ENST00000570457,ENST00000575425,ENST00000576628,ENST00000573893,ENST00000571220,ENST00000570439,ENST00000576594,ENST00000571471,ENST00000570504,ENST00000574499,ENST00000575415"	"ENSP00000158762,ENSP00000458173,ENSP00000459422,ENSP00000461314,ENSP00000460735,ENSP00000460803,ENSP00000460054"
ACAP1	0.195196	0.182178	0.623633	0.0260527	0.556462	0.011008	PH_hs_0042311	"Homo sapiens ArfGAP with coiled-coil, ankyrin repeat and PH domains 1 (ACAP1)"	1	9744	NM_014716	NP_055531.1	ENSG00000072818	"ENST00000158762,ENST00000570457,ENST00000575425,ENST00000576628,ENST00000573893,ENST00000571220,ENST00000570439,ENST00000576594,ENST00000571471,ENST00000570504,ENST00000574499,ENST00000575415"	"ENSP00000158762,ENSP00000458173,ENSP00000459422,ENSP00000461314,ENSP00000460735,ENSP00000460803,ENSP00000460054"
ACAP2	-0.296786	0.0507288	-0.266452	0.023223	-0.0502839	0.844074	PH_hs_0049311	"Homo sapiens ArfGAP with coiled-coil, ankyrin repeat and PH domains 2 (ACAP2)"	1	23527	NM_012287	NP_036419.3	ENSG00000114331	"ENST00000326793,ENST00000472860,ENST00000466876,ENST00000450200,ENST00000475905,ENST00000484296,ENST00000439758,ENST00000471593,ENST00000423531,ENST00000480906,ENST00000481463,ENST00000439666,ENST00000447662,ENST00000490224,ENST00000618471"	"ENSP00000324287,ENSP00000412338,ENSP00000413388,ENSP00000411336,ENSP00000405262,ENSP00000484209"
ACAP2	-0.296786	0.0507288	-0.266452	0.023223	-0.0502839	0.844074	PH_hs_0049311	"Homo sapiens ArfGAP with coiled-coil, ankyrin repeat and PH domains 2 (ACAP2)"	1	23527	NM_012287	NP_036419.3	ENSG00000114331	"ENST00000326793,ENST00000472860,ENST00000466876,ENST00000450200,ENST00000475905,ENST00000484296,ENST00000439758,ENST00000471593,ENST00000423531,ENST00000480906,ENST00000481463,ENST00000439666,ENST00000447662,ENST00000490224,ENST00000618471"	"ENSP00000324287,ENSP00000412338,ENSP00000413388,ENSP00000411336,ENSP00000405262,ENSP00000484209"
ACMSD	0.143881	0.47509	0.240428	0.0424312	-0.0706637	0.339535	PH_hs_0006267	Homo sapiens aminocarboxymuconate semialdehyde decarboxylase (ACMSD)	1	130013	NM_138326	NP_612199.2	ENSG00000153086	"ENST00000356140,ENST00000485893,ENST00000392928,ENST00000498093"	"ENSP00000348459,ENSP00000376659"
ACOT11	-0.0250456	0.962539	-1.49263	0.0072567	-0.745593	0.255207	PH_hs_0035788	Homo sapiens acyl-CoA thioesterase 11 (ACOT11)	1	26027	NM_015547	NP_056362.1	ENSG00000162390	"ENST00000481208,ENST00000498228,ENST00000343744,ENST00000371316,ENST00000479837"	"ENSP00000340260,ENSP00000360366"
ACOX2	0.364672	0.0355821	-0.083945	0.748816	-0.203755	0.376215	PH_hs_0033515	"Homo sapiens acyl-CoA oxidase 2, branched chain (ACOX2)"	1	8309	NM_003500	NP_003491.1	ENSG00000168306	"ENST00000481527,ENST00000467738,ENST00000459701,ENST00000302819,ENST00000460921,ENST00000489472,ENST00000459888,ENST00000466810,ENST00000492530,ENST00000474098,ENST00000475143,ENST00000466689,ENST00000480791"	"ENSP00000418562,ENSP00000307697,ENSP00000417877,ENSP00000418515,ENSP00000419133,ENSP00000419927"
ACOXL	0.27101	0.064791	-0.70964	0.102918	-0.388055	0.0457415	PH_hs_0046080	Homo sapiens acyl-CoA oxidase-like (ACOXL)	1	55289	NM_001142807	NP_001136279.1	ENSG00000153093	"ENST00000389811,ENST00000439055,ENST00000340561,ENST00000448863,ENST00000461340,ENST00000417074,ENST00000433706,ENST00000443586,ENST00000441974,ENST00000496981"	"ENSP00000374461,ENSP00000407761,ENSP00000343717,ENSP00000394701,ENSP00000387832,ENSP00000406774,ENSP00000409500,ENSP00000393823"
ACR	-0.484884	0.450774	-0.423086	0.446159	0.983374	0.0328178	PH_hs_0010800	Homo sapiens acrosin (ACR)	1	49	NM_001097	NP_001088.2	ENSG00000100312	"ENST00000533930,ENST00000216139,ENST00000529621,ENST00000527761"	"ENSP00000216139,ENSP00000435120"
ACRBP	-0.157276	0.628245	-0.288601	0.41195	-0.539102	0.0488366	PH_hs_0001744	Homo sapiens acrosin binding protein (ACRBP)	1	84519	NM_032489	NP_115878.2	ENSG00000111644	"ENST00000540513,ENST00000229243,ENST00000414226,ENST00000542357,ENST00000536350,ENST00000535884,ENST00000544352,ENST00000546114,ENST00000538524"	"ENSP00000229243,ENSP00000402725,ENSP00000443153,ENSP00000445262,ENSP00000438656"
ACSM1	-0.150273	0.555281	-0.386804	0.201929	-0.864662	0.0317264	PH_hs_0023661	Homo sapiens acyl-CoA synthetase medium-chain family member 1 (ACSM1)	1	116285	NM_052956	NP_443188.2	ENSG00000166743	"ENST00000519031,ENST00000307493,ENST00000519745,ENST00000524149,ENST00000520010,ENST00000523065"	"ENSP00000301956,ENSP00000428650,ENSP00000428098,ENSP00000428047,ENSP00000428830"
ACSM5	0.028681	0.839289	0.307194	0.13798	0.371435	0.0357879	PH_hs_0044346	Homo sapiens acyl-CoA synthetase medium-chain family member 5 (ACSM5)	1	54988	NM_017888	NP_060358.2	ENSG00000183549	"ENST00000575584,ENST00000331849,ENST00000575070,ENST00000570305,ENST00000574748,ENST00000573920,ENST00000577024"	"ENSP00000460112,ENSP00000327916,ENSP00000478073,ENSP00000461752"
ACTA1	-0.0843029	0.612012	-0.493228	0.262106	-0.651606	0.0280853	PH_hs_0000172	"Homo sapiens actin, alpha 1, skeletal muscle (ACTA1)"	1	58	NM_001100	NP_001091.1	ENSG00000143632	"ENST00000366684,ENST00000366683"	"ENSP00000355645,ENSP00000355644"
ACTL6B	0.208274	0.0847007	0.520258	0.0156479	0.475225	0.0155709	PH_hs_0043164	Homo sapiens actin-like 6B (ACTL6B)	1	51412	NM_016188	NP_057272.1	ENSG00000077080	"ENST00000160382,ENST00000487125,ENST00000485601,ENST00000487225,ENST00000489904,ENST00000461605"	"ENSP00000160382,ENSP00000420151"
ACTL6B	0.208274	0.0847007	0.520258	0.0156479	0.475225	0.0155709	PH_hs_0043164	Homo sapiens actin-like 6B (ACTL6B)	1	51412	NM_016188	NP_057272.1	ENSG00000077080	"ENST00000160382,ENST00000487125,ENST00000485601,ENST00000487225,ENST00000489904,ENST00000461605"	"ENSP00000160382,ENSP00000420151"
ACTR2	0.614029	0.14253	0.484647	0.0411042	0.206726	0.357315	PH_hs_0034260	Homo sapiens ARP2 actin-related protein 2 homolog (yeast)	1	10097	"NM_005722,NM_001005386"	"NP_005713.1,NP_001005386.1"	ENSG00000138071	"ENST00000260641,ENST00000476840,ENST00000471552,ENST00000377982,ENST00000542850"	"ENSP00000260641,ENSP00000367220,ENSP00000437383"
ACTR3C	0.508971	0.111936	0.899133	0.0290597	0.833813	0.0396722	PH_hs_0046450	Homo sapiens ARP3 actin-related protein 3 homolog C (yeast)	1	653857	"NM_001164459,NM_001164458"	"NP_001157931.1,NP_001157930.1"	ENSG00000106526	"ENST00000478393,ENST00000252071,ENST00000477871,ENST00000477367,ENST00000539352,ENST00000613959"	"ENSP00000417426,ENSP00000252071,ENSP00000418635,ENSP00000417997,ENSP00000440990,ENSP00000481447"
ACTR3C	0.508971	0.111936	0.899133	0.0290597	0.833813	0.0396722	PH_hs_0046450	Homo sapiens ARP3 actin-related protein 3 homolog C (yeast)	1	653857	"NM_001164459,NM_001164458"	"NP_001157931.1,NP_001157930.1"	ENSG00000106526	"ENST00000478393,ENST00000252071,ENST00000477871,ENST00000477367,ENST00000539352,ENST00000613959"	"ENSP00000417426,ENSP00000252071,ENSP00000418635,ENSP00000417997,ENSP00000440990,ENSP00000481447"
ACVR2A	-0.287782	0.0318726	-0.0761245	0.425793	-0.0722078	0.868775	PH_hs_0018877	"Homo sapiens activin A receptor, type IIA (ACVR2A)"	1	92	NM_001616	NP_001607.1	ENSG00000121989	"ENST00000487959,ENST00000241416,ENST00000462659,ENST00000404590,ENST00000465329,ENST00000495775,ENST00000535787"	"ENSP00000241416,ENSP00000384338,ENSP00000439988"
ADAL	0.239348	0.0460636	0.0423447	0.877107	-0.552435	0.00417785	PH_hs_0032726	Homo sapiens adenosine deaminase-like (ADAL)	1	161823	NM_001159280	NP_001152752.1	ENSG00000168803	"ENST00000428046,ENST00000389651,ENST00000565555,ENST00000563551,ENST00000562188,ENST00000566154,ENST00000422466,ENST00000610420"	"ENSP00000413074,ENSP00000374302,ENSP00000455907,ENSP00000456242,ENSP00000457591,ENSP00000398744,ENSP00000478575"
ADAL	0.239348	0.0460636	0.0423447	0.877107	-0.552435	0.00417785	PH_hs_0032726	Homo sapiens adenosine deaminase-like (ADAL)	1	161823	NM_001159280	NP_001152752.1	ENSG00000168803	"ENST00000428046,ENST00000389651,ENST00000565555,ENST00000563551,ENST00000562188,ENST00000566154,ENST00000422466,ENST00000610420"	"ENSP00000413074,ENSP00000374302,ENSP00000455907,ENSP00000456242,ENSP00000457591,ENSP00000398744,ENSP00000478575"
ADAM11	0.126422	0.442086	0.31836	0.271614	0.399012	0.0349092	PH_hs_0048655	Homo sapiens ADAM metallopeptidase domain 11 (ADAM11)	1	4185	NM_002390	NP_002381.2	ENSG00000073670	"ENST00000200557,ENST00000355638,ENST00000535346,ENST00000587773,ENST00000588363"	"ENSP00000200557,ENSP00000347856,ENSP00000443773,ENSP00000465537"
ADAM17	0.0721298	0.643758	0.370531	0.0448369	0.422581	0.014191	PH_hs_0024641	Homo sapiens ADAM metallopeptidase domain 17 (ADAM17)	1	6868	NM_003183	NP_003174.3	ENSG00000151694	"ENST00000310823,ENST00000497134,ENST00000478059,ENST00000618923"	"ENSP00000309968,ENSP00000418728,ENSP00000480552"
ADAM17	0.0721298	0.643758	0.370531	0.0448369	0.422581	0.014191	PH_hs_0024641	Homo sapiens ADAM metallopeptidase domain 17 (ADAM17)	1	6868	NM_003183	NP_003174.3	ENSG00000151694	"ENST00000310823,ENST00000497134,ENST00000478059,ENST00000618923"	"ENSP00000309968,ENSP00000418728,ENSP00000480552"
ADAM19	0.00662097	0.985115	0.294968	0.380472	0.479845	0.0508571	PH_hs_0023517	Homo sapiens ADAM metallopeptidase domain 19 (ADAM19)	1	8728	NM_033274	NP_150377.1	ENSG00000135074	"ENST00000517951,ENST00000517374,ENST00000257527,ENST00000517905,ENST00000519752"	"ENSP00000428376,ENSP00000431027,ENSP00000257527,ENSP00000428654"
ADAM21	-0.645289	0.0139352	-0.73029	0.00992038	-0.55177	0.0666236	PH_hs_0043781	Homo sapiens ADAM metallopeptidase domain 21 (ADAM21)	1	8747	NM_003813	NP_003804.2	ENSG00000139985	ENST00000603540	ENSP00000474385
ADAM21	-0.645289	0.0139352	-0.73029	0.00992038	-0.55177	0.0666236	PH_hs_0043781	Homo sapiens ADAM metallopeptidase domain 21 (ADAM21)	1	8747	NM_003813	NP_003804.2	ENSG00000139985	ENST00000603540	ENSP00000474385
ADAM22	-0.218451	0.347956	0.281922	0.0649908	0.747393	0.0191761	PH_hs_0044345	Homo sapiens ADAM metallopeptidase domain 22 (ADAM22)	1	53616	"NM_004194,NM_021721"	"NP_004185.1,NP_068367.1"	ENSG00000008277	"ENST00000398204,ENST00000439864,ENST00000412441,ENST00000398201,ENST00000265727,ENST00000398209,ENST00000398203,ENST00000478920,ENST00000426930,ENST00000413139,ENST00000476330"	"ENSP00000381262,ENSP00000391334,ENSP00000413899,ENSP00000381260,ENSP00000265727,ENSP00000381267,ENSP00000381261,ENSP00000396233,ENSP00000412085"
ADAM23	0.115753	0.464143	0.388714	0.103911	0.465808	0.0468499	PH_hs_0025231	Homo sapiens ADAM metallopeptidase domain 23 (ADAM23)	1	8745	NM_003812	NP_003803.1	ENSG00000114948	"ENST00000264377,ENST00000374415,ENST00000444281"	"ENSP00000264377,ENSP00000363536,ENSP00000406827"
ADAMTS16	0.178868	0.772122	0.67469	0.0385336	0.80689	0.00201455	PH_hs_0017092	"Homo sapiens ADAM metallopeptidase with thrombospondin type 1 motif, 16 (ADAMTS16)"	1	170690	NM_139056	NP_620687.2	ENSG00000145536	"ENST00000511368,ENST00000274181,ENST00000433402,ENST00000513709"	"ENSP00000421631,ENSP00000274181"
ADAMTS16	0.178868	0.772122	0.67469	0.0385336	0.80689	0.00201455	PH_hs_0017092	"Homo sapiens ADAM metallopeptidase with thrombospondin type 1 motif, 16 (ADAMTS16)"	1	170690	NM_139056	NP_620687.2	ENSG00000145536	"ENST00000511368,ENST00000274181,ENST00000433402,ENST00000513709"	"ENSP00000421631,ENSP00000274181"
ADAMTSL4	0.279409	0.13844	0.68328	0.00525255	0.739345	0.00335921	PH_hs_0030111	Homo sapiens ADAMTS-like 4 (ADAMTSL4)	1	54507	NM_019032	NP_061905.2	ENSG00000143382	"ENST00000369041,ENST00000483335,ENST00000369038,ENST00000489159,ENST00000369039,ENST00000271643,ENST00000622417"	"ENSP00000358037,ENSP00000358034,ENSP00000358035,ENSP00000271643,ENSP00000477897"
ADAMTSL4	0.279409	0.13844	0.68328	0.00525255	0.739345	0.00335921	PH_hs_0030111	Homo sapiens ADAMTS-like 4 (ADAMTSL4)	1	54507	NM_019032	NP_061905.2	ENSG00000143382	"ENST00000369041,ENST00000483335,ENST00000369038,ENST00000489159,ENST00000369039,ENST00000271643,ENST00000622417"	"ENSP00000358037,ENSP00000358034,ENSP00000358035,ENSP00000271643,ENSP00000477897"
ADCY10	-0.346787	0.137038	-0.159141	0.70337	-0.56524	0.00757398	PH_hs_0024803	Homo sapiens adenylate cyclase 10 (soluble)	1	55811	"NM_018417,NM_001167749"	"NP_060887.2,NP_001161221.1"	ENSG00000143199	"ENST00000545172,ENST00000367851,ENST00000485964,ENST00000367848,ENST00000476818"	"ENSP00000441992,ENSP00000356825,ENSP00000476402,ENSP00000356822,ENSP00000475192"
ADCY6	0.288799	0.17863	0.72404	0.105974	0.764083	0.0265632	PH_hs_0001172	Homo sapiens adenylate cyclase 6 (ADCY6)	1	112	NM_015270	NP_056085.1	ENSG00000174233	"ENST00000547260,ENST00000550422,ENST00000307885,ENST00000552099,ENST00000548351,ENST00000552090,ENST00000551435,ENST00000548820,ENST00000357869"	"ENSP00000446730,ENSP00000311405,ENSP00000447702,ENSP00000350536"
ADCYAP1	-0.179576	0.555987	0.194062	0.50695	-0.790213	0.0380731	PH_hs_0004082	Homo sapiens adenylate cyclase activating polypeptide 1 (pituitary)	1	116	"NM_001099733,NM_001117"	"NP_001093203.1,NP_001108.2"	ENSG00000141433	"ENST00000450565,ENST00000579794,ENST00000269200,ENST00000581602"	"ENSP00000411658,ENSP00000462647"
ADCYAP1R1	-0.177568	0.614642	-0.326779	0.0480973	-0.756738	0.00512036	PH_hs_0018367	Homo sapiens adenylate cyclase activating polypeptide 1 (pituitary)	1	117	"NM_001199637,NM_001118,NM_001199636,NM_001199635"	"NP_001186566.1,NP_001109.2,NP_001186565.1,NP_001186564.1"	ENSG00000078549	"ENST00000304166,ENST00000409363,ENST00000431811,ENST00000396211,ENST00000409489,ENST00000436116,ENST00000614107"	"ENSP00000306620,ENSP00000387335,ENSP00000400893,ENSP00000379514,ENSP00000386395,ENSP00000416622,ENSP00000483721"
ADCYAP1R1	-0.177568	0.614642	-0.326779	0.0480973	-0.756738	0.00512036	PH_hs_0018367	Homo sapiens adenylate cyclase activating polypeptide 1 (pituitary)	1	117	"NM_001199637,NM_001118,NM_001199636,NM_001199635"	"NP_001186566.1,NP_001109.2,NP_001186565.1,NP_001186564.1"	ENSG00000078549	"ENST00000304166,ENST00000409363,ENST00000431811,ENST00000396211,ENST00000409489,ENST00000436116,ENST00000614107"	"ENSP00000306620,ENSP00000387335,ENSP00000400893,ENSP00000379514,ENSP00000386395,ENSP00000416622,ENSP00000483721"
ADD2	-0.233592	0.723881	-0.79712	0.254462	-1.37796	0.0374716	PH_hs_0022302	Homo sapiens adducin 2 (beta)	1	119	"NM_001185054,NM_017488,NM_001617"	"NP_001171983.1,NP_059522.1,NP_001608.1"	ENSG00000075340	"ENST00000403045,ENST00000264436,ENST00000407644,ENST00000355733,ENST00000481675,ENST00000522886,ENST00000456320,ENST00000413157,ENST00000430656,ENST00000415348,ENST00000425976,ENST00000447731,ENST00000473232,ENST00000496178"	"ENSP00000384303,ENSP00000264436,ENSP00000384677,ENSP00000347972,ENSP00000430243,ENSP00000414546,ENSP00000388072,ENSP00000398112,ENSP00000412357,ENSP00000412681,ENSP00000403722"
ADD2	0.315332	0.0284149	0.526389	0.145888	-0.534375	0.662411	PH_hs_0045674	Homo sapiens adducin 2 (beta)	1	119	"NM_001185055,NM_017482"	"NP_001171984.1,NP_059516.2"	ENSG00000075340	"ENST00000403045,ENST00000264436,ENST00000407644,ENST00000355733,ENST00000481675,ENST00000522886,ENST00000456320,ENST00000413157,ENST00000430656,ENST00000415348,ENST00000425976,ENST00000447731,ENST00000473232,ENST00000496178"	"ENSP00000384303,ENSP00000264436,ENSP00000384677,ENSP00000347972,ENSP00000430243,ENSP00000414546,ENSP00000388072,ENSP00000398112,ENSP00000412357,ENSP00000412681,ENSP00000403722"
ADD3	0.265526	0.0530728	0.19408	0.198774	0.209165	0.0711228	PH_hs_0016139	Homo sapiens adducin 3 (gamma)	1	120	"NM_019903,NM_001121,NM_016824"	"NP_063968.1,NP_001112.2,NP_058432.1"	ENSG00000148700	"ENST00000468251,ENST00000360162,ENST00000356080,ENST00000277900,ENST00000487085,ENST00000484622,ENST00000459738,ENST00000495661,ENST00000497125,ENST00000475954,ENST00000496517,ENST00000473669,ENST00000468345,ENST00000486014,ENST00000488104,ENST00000488837,ENST00000472568,ENST00000492162,ENST00000488799,ENST00000479805,ENST00000611329"	"ENSP00000353286,ENSP00000348381,ENSP00000277900,ENSP00000480646"
ADGRD1	-0.34274	0.373119	-0.744482	0.0196899	-0.788974	0.00986858	PH_hs_0048147	Homo sapiens adhesion G protein-coupled receptor D1 (ADGRD1)	1	283383	NM_198827	NP_942122.2	ENSG00000111452	"ENST00000541143,ENST00000261654,ENST00000543826,ENST00000542091,ENST00000535015,ENST00000541937,ENST00000537600,ENST00000544673,ENST00000545900,ENST00000376682,ENST00000446583,ENST00000335486,ENST00000543617,ENST00000536988,ENST00000537489,ENST00000540207"	"ENSP00000261654,ENSP00000442501,ENSP00000444425,ENSP00000482235,ENSP00000334127,ENSP00000438021"
ADGRD1	-0.34274	0.373119	-0.744482	0.0196899	-0.788974	0.00986858	PH_hs_0048147	Homo sapiens adhesion G protein-coupled receptor D1 (ADGRD1)	1	283383	NM_198827	NP_942122.2	ENSG00000111452	"ENST00000541143,ENST00000261654,ENST00000543826,ENST00000542091,ENST00000535015,ENST00000541937,ENST00000537600,ENST00000544673,ENST00000545900,ENST00000376682,ENST00000446583,ENST00000335486,ENST00000543617,ENST00000536988,ENST00000537489,ENST00000540207"	"ENSP00000261654,ENSP00000442501,ENSP00000444425,ENSP00000482235,ENSP00000334127,ENSP00000438021"
ADH4	-0.315808	0.209618	-0.400406	0.401252	-0.826612	0.0258806	PH_hs_0042032	Homo sapiens alcohol dehydrogenase 4 (class II)	1	127	NM_000670	NP_000661.2	ENSG00000198099	"ENST00000508393,ENST00000265512,ENST00000509471,ENST00000505590,ENST00000506705,ENST00000512499,ENST00000503416,ENST00000504125,ENST00000503944,ENST00000504894,ENST00000504581,ENST00000629236"	"ENSP00000424630,ENSP00000265512,ENSP00000424583,ENSP00000425416,ENSP00000426667,ENSP00000423571,ENSP00000427525,ENSP00000427261,ENSP00000486450"
ADH7	-0.144307	0.275589	-0.367784	0.151766	-0.395423	0.0455038	PH_hs_0000047	Homo sapiens alcohol dehydrogenase 7 (class IV)	1	131	"NM_001166504,NM_000673"	"NP_001159976.1,NP_000664.2"	ENSG00000196344	"ENST00000437033,ENST00000482593,ENST00000485660,ENST00000476959,ENST00000474027,ENST00000209665"	"ENSP00000414254,ENSP00000420613,ENSP00000420269,ENSP00000420300,ENSP00000209665"
ADIPOR2	0.0503561	0.59964	-0.14386	0.347548	-0.211513	0.0406693	PH_hs_0016487	Homo sapiens adiponectin receptor 2 (ADIPOR2)	1	79602	NM_024551	NP_078827.2	ENSG00000006831	"ENST00000537545,ENST00000357103,ENST00000540974,ENST00000543456,ENST00000535774,ENST00000544470,ENST00000537190"	ENSP00000349616
ADM2	-0.137078	0.205988	0.502794	0.00832292	-0.0195032	0.972739	PH_hs_0026240	Homo sapiens adrenomedullin 2 (ADM2)	1	79924	"NM_001253845,NM_024866"	"NP_001240774.1,NP_079142.2"	ENSG00000128165	"ENST00000395738,ENST00000395737"	"ENSP00000379087,ENSP00000379086"
ADPRHL1	-0.00844342	0.928956	0.509787	0.0354552	0.373567	0.050241	PH_hs_0005460	Homo sapiens ADP-ribosylhydrolase like 1 (ADPRHL1)	1	113622	"NM_199162,NM_138430"	"NP_954631.1,NP_612439.2"	ENSG00000153531	"ENST00000356501,ENST00000375418,ENST00000413169"	"ENSP00000348894,ENSP00000364567,ENSP00000416213"
ADPRHL1	-0.00844342	0.928956	0.509787	0.0354552	0.373567	0.050241	PH_hs_0005460	Homo sapiens ADP-ribosylhydrolase like 1 (ADPRHL1)	1	113622	"NM_199162,NM_138430"	"NP_954631.1,NP_612439.2"	ENSG00000153531	"ENST00000356501,ENST00000375418,ENST00000413169"	"ENSP00000348894,ENSP00000364567,ENSP00000416213"
AFAP1L2	-0.0456299	0.864149	-1.22259	0.00223711	-0.305046	0.723666	PH_hs_0032818	Homo sapiens actin filament associated protein 1-like 2 (AFAP1L2)	1	84632	"NM_001001936,NM_032550"	"NP_001001936.1,NP_115939.1"	ENSG00000169129	"ENST00000304129,ENST00000369271,ENST00000491814,ENST00000486300,ENST00000419268,ENST00000483496"	"ENSP00000303042,ENSP00000358276,ENSP00000396781"
AFF3	-0.539737	0.017488	-0.0548788	0.66861	-0.00312089	0.987171	PH_hs_0049129	"Homo sapiens AF4/FMR2 family, member 3 (AFF3)"	1	3899	"NM_001025108,NM_002285"	"NP_001020279.1,NP_002276.2"	ENSG00000144218	"ENST00000409236,ENST00000409579,ENST00000445815,ENST00000430789,ENST00000498090,ENST00000432037,ENST00000423966,ENST00000441400,ENST00000424600,ENST00000416492,ENST00000440445,ENST00000415384,ENST00000427118,ENST00000483600,ENST00000317233"	"ENSP00000387207,ENSP00000386834,ENSP00000416685,ENSP00000414099,ENSP00000406484,ENSP00000396582,ENSP00000399795,ENSP00000411383,ENSP00000395068,ENSP00000393732,ENSP00000407448,ENSP00000416131,ENSP00000317421"
AFM	0.147648	0.422794	0.372959	0.165691	0.482214	0.00690446	PH_hs_0022795	Homo sapiens afamin (AFM)	1	173	NM_001133	NP_001124.1	ENSG00000079557	"ENST00000226355,ENST00000505794"	ENSP00000226355
AGFG2	-0.180247	0.356307	0.138969	0.805017	0.422079	0.0265315	PH_hs_0014283	Homo sapiens ArfGAP with FG repeats 2 (AGFG2)	1	3268	NM_006076	NP_006067.3	ENSG00000106351	"ENST00000430857,ENST00000477022,ENST00000300176,ENST00000474713,ENST00000429987"	"ENSP00000394453,ENSP00000300176,ENSP00000388594"
AGMAT	0.192922	0.205373	0.464808	0.0202406	-1.37884	0.159371	PH_hs_0061714	Homo sapiens agmatine ureohydrolase (agmatinase)	1	79814	NM_024758	NP_079034.3	ENSG00000116771	ENST00000375826	ENSP00000364986
AGO3	0.203911	0.258257	0.544724	0.102032	0.649972	0.0382952	PH_hs_0011124	Homo sapiens argonaute RISC catalytic component 3 (AGO3)	1	192669	"NM_024852,NM_177422"	"NP_079128.2,NP_803171.1"	ENSG00000126070	"ENST00000324350,ENST00000373191,ENST00000246314,ENST00000491443,ENST00000471099,ENST00000397828"	"ENSP00000317425,ENSP00000362287,ENSP00000246314,ENSP00000380928"
AGPAT3	-0.293063	0.0862228	-0.312225	0.298042	-0.483703	0.029779	PH_hs_0048037	Homo sapiens 1-acylglycerol-3-phosphate O-acyltransferase 3 (AGPAT3)	1	56894	"NM_001037553,NM_020132"	"NP_001032642.1,NP_064517.1"	ENSG00000160216	"ENST00000291572,ENST00000474735,ENST00000448287,ENST00000398061,ENST00000327505,ENST00000445582,ENST00000398063,ENST00000398058,ENST00000457068,ENST00000448845,ENST00000498670,ENST00000422850,ENST00000497909,ENST00000479117,ENST00000481319,ENST00000467358,ENST00000484865,ENST00000546158"	"ENSP00000291572,ENSP00000389318,ENSP00000381138,ENSP00000332989,ENSP00000412079,ENSP00000381140,ENSP00000381135,ENSP00000413906,ENSP00000394102,ENSP00000414440,ENSP00000443510"
AGPAT6	0.0630299	0.698623	-0.11952	0.559618	-0.308837	0.0178067	PH_hs_0002250	Homo sapiens 1-acylglycerol-3-phosphate O-acyltransferase 6 (AGPAT6)	1	137964	NM_178819	NP_848934.1	ENSG00000158669	"ENST00000521184,ENST00000520258,ENST00000396987,ENST00000519853,ENST00000520223,ENST00000521121,ENST00000521806,ENST00000519921,ENST00000523906,ENST00000521349,ENST00000518628"	"ENSP00000380184,ENSP00000429477,ENSP00000428648,ENSP00000428630"
AGR3	-0.402399	0.43676	-0.73286	0.334129	-1.452	0.02343	PH_hs_0005614	Homo sapiens anterior gradient 3 (AGR3)	1	155465	NM_176813	NP_789783.1	ENSG00000173467	"ENST00000310398,ENST00000402239,ENST00000414935,ENST00000486448"	"ENSP00000308606,ENSP00000386016,ENSP00000392818"
AGT	-0.234475	0.120551	-0.405278	0.00751111	-0.107543	0.246314	PH_hs_0022023	"Homo sapiens angiotensinogen (serpin peptidase inhibitor, clade A, member 8)"	1	183	NM_000029	NP_000020.1	ENSG00000135744	ENST00000366667	ENSP00000355627
AIM2	-0.132799	0.822315	0.242822	0.37576	0.641492	0.00849189	PH_hs_0005844	Homo sapiens absent in melanoma 2 (AIM2)	1	9447	NM_004833	NP_004824.1	ENSG00000163568	"ENST00000368130,ENST00000481829,ENST00000368129,ENST00000411768,ENST00000612470"	"ENSP00000357112,ENSP00000357111,ENSP00000483485"
AJAP1	-0.0886339	0.852927	0.257415	0.384607	0.671312	0.0168474	PH_hs_0002281	Homo sapiens adherens junctions associated protein 1 (AJAP1)	1	55966	NM_018836	NP_061324.1	ENSG00000196581	"ENST00000378190,ENST00000378191,ENST00000466761"	"ENSP00000367432,ENSP00000367433"
AJUBA	-0.125418	0.292392	0.0411226	0.922587	0.548049	0.0163729	PH_hs_0030222	Homo sapiens ajuba LIM protein (AJUBA)	1	84962	"NM_198086,NM_032876"	"NP_932352.1,NP_116265.1"	ENSG00000129474	"ENST00000262713,ENST00000397388,ENST00000553592,ENST00000556731,ENST00000553911,ENST00000555479,ENST00000553736,ENST00000361265"	"ENSP00000262713,ENSP00000380543,ENSP00000452369,ENSP00000451649,ENSP00000452325,ENSP00000451772,ENSP00000354491"
AKAP13	-0.0242196	0.894166	-0.221643	0.0378615	-0.0556794	0.70798	PH_hs_0023930	Homo sapiens A kinase (PRKA)	1	11214	"NM_001270546,NM_007200,NM_006738"	"NP_001257475.1,NP_009131.2,NP_006729.4"	ENSG00000170776	"ENST00000560571,ENST00000559362,ENST00000560302,ENST00000394518,ENST00000361243,ENST00000560256,ENST00000558166,ENST00000558811,ENST00000560340,ENST00000560676,ENST00000560579,ENST00000559486,ENST00000612418,ENST00000560957,ENST00000558092,ENST00000557852,ENST00000560482,ENST00000559278,ENST00000558644,ENST00000559820,ENST00000558009,ENST00000559391,ENST00000560185,ENST00000394510"	"ENSP00000453768,ENSP00000453634,ENSP00000378026,ENSP00000354718,ENSP00000453620,ENSP00000452622,ENSP00000452698,ENSP00000483091,ENSP00000481485,ENSP00000477780,ENSP00000453205,ENSP00000482058,ENSP00000480789,ENSP00000378018"
AKAP7	-0.355771	0.0833053	-0.236998	0.0359717	-0.139139	0.183952	PH_hs_0001224	Homo sapiens A kinase (PRKA)	1	9465	"NM_138633,NM_004842,NM_016377"	"NP_619539.1,NP_004833.1,NP_057461.2"	ENSG00000118507	"ENST00000431975,ENST00000541650,ENST00000366358,ENST00000479599,ENST00000543815,ENST00000535150,ENST00000537868,ENST00000263050,ENST00000342266,ENST00000474850"	"ENSP00000405252,ENSP00000441048,ENSP00000445486,ENSP00000446022,ENSP00000263050,ENSP00000345149,ENSP00000418208"
AKNA	0.334518	0.0565474	0.62144	0.0193456	0.493004	0.0210168	PH_hs_0060690	Homo sapiens AT-hook transcription factor (AKNA)	1	80709	NM_030767	NP_110394.3	ENSG00000106948	"ENST00000374088,ENST00000492875,ENST00000223791,ENST00000374075,ENST00000491133,ENST00000490767,ENST00000312033,ENST00000307564,ENST00000374079"	"ENSP00000363201,ENSP00000223791,ENSP00000363188,ENSP00000309222,ENSP00000303769,ENSP00000363192"
AKNA	0.334518	0.0565474	0.62144	0.0193456	0.493004	0.0210168	PH_hs_0060690	Homo sapiens AT-hook transcription factor (AKNA)	1	80709	NM_030767	NP_110394.3	ENSG00000106948	"ENST00000374088,ENST00000492875,ENST00000223791,ENST00000374075,ENST00000491133,ENST00000490767,ENST00000312033,ENST00000307564,ENST00000374079"	"ENSP00000363201,ENSP00000223791,ENSP00000363188,ENSP00000309222,ENSP00000303769,ENSP00000363192"
AKR1B15	0.0835417	0.375635	0.370592	0.03799	0.32994	0.14508	PH_hs_0060111	"Homo sapiens aldo-keto reductase family 1, member B15 (AKR1B15)"	1	441282	NM_001080538	NP_001074007.2	ENSG00000227471	"ENST00000457545,ENST00000467156,ENST00000423958"	"ENSP00000389289,ENSP00000397009"
AKR1C1	0.131187	0.157001	0.659874	0.0188298	0.513803	0.0427127	PH_hs_0062199	"Homo sapiens aldo-keto reductase family 1, member C1 (AKR1C1)"	1	1645	NM_001353	NP_001344.2	ENSG00000187134	"ENST00000477661,ENST00000380872,ENST00000442997,ENST00000380859,ENST00000476100,ENST00000434459"	"ENSP00000370254,ENSP00000416415,ENSP00000370240,ENSP00000412248"
AKR1C1	0.131187	0.157001	0.659874	0.0188298	0.513803	0.0427127	PH_hs_0062199	"Homo sapiens aldo-keto reductase family 1, member C1 (AKR1C1)"	1	1645	NM_001353	NP_001344.2	ENSG00000187134	"ENST00000477661,ENST00000380872,ENST00000442997,ENST00000380859,ENST00000476100,ENST00000434459"	"ENSP00000370254,ENSP00000416415,ENSP00000370240,ENSP00000412248"
AKR1C8P	-0.218077	0.299139	-0.0349923	0.637691	-0.408971	0.00715602	PH_hs_0034735	"Homo sapiens aldo-keto reductase family 1, member C8, pseudogene (AKR1C8P)"	1	340811	NR_027916	-	ENSG00000264006	"ENST00000584929,ENST00000578467"
ALAD	0.278969	0.223543	0.572866	0.0225601	-0.194197	0.83322	PH_hs_0061747	Homo sapiens aminolevulinate dehydratase (ALAD)	1	210	NM_000031	NP_000022.3	ENSG00000148218	"ENST00000409155,ENST00000482847,ENST00000468504,ENST00000464749,ENST00000448137,ENST00000482001,ENST00000452726,ENST00000494848,ENST00000445750"	"ENSP00000386284,ENSP00000392748,ENSP00000415737,ENSP00000398438"
ALAS1	0.115929	0.498658	-0.256099	0.0454356	-0.105656	0.405616	PH_hs_0031344	Homo sapiens 5'-aminolevulinate synthase 1 (ALAS1)	1	211	"NM_199166,NM_000688"	"NP_954635.1,NP_000679.1"	ENSG00000023330	"ENST00000469224,ENST00000394965,ENST00000310271,ENST00000484952,ENST00000493402,ENST00000459884"	"ENSP00000417719,ENSP00000378416,ENSP00000309259,ENSP00000418779,ENSP00000417352,ENSP00000419423"
ALCAM	-0.342655	0.0381481	-0.358694	0.0183604	0.0679914	0.3906	PH_hs_0048683	Homo sapiens activated leukocyte cell adhesion molecule (ALCAM)	1	214	"NM_001243280,NM_001627"	"NP_001230209.1,NP_001618.2"	ENSG00000170017	"ENST00000306107,ENST00000470756,ENST00000472644,ENST00000481337,ENST00000486979,ENST00000460954,ENST00000465413,ENST00000491388,ENST00000489178"	"ENSP00000305988,ENSP00000419236,ENSP00000418213,ENSP00000418937"
ALCAM	-0.342655	0.0381481	-0.358694	0.0183604	0.0679914	0.3906	PH_hs_0048683	Homo sapiens activated leukocyte cell adhesion molecule (ALCAM)	1	214	"NM_001243280,NM_001627"	"NP_001230209.1,NP_001618.2"	ENSG00000170017	"ENST00000306107,ENST00000470756,ENST00000472644,ENST00000481337,ENST00000486979,ENST00000460954,ENST00000465413,ENST00000491388,ENST00000489178"	"ENSP00000305988,ENSP00000419236,ENSP00000418213,ENSP00000418937"
ALDH3B2	0.225376	0.373212	0.798652	0.0373816	0.954708	0.0529367	PH_hs_0004918	"Homo sapiens aldehyde dehydrogenase 3 family, member B2 (ALDH3B2)"	1	222	"NM_001031615,NM_000695"	"NP_001026786.1,NP_000686.2"	ENSG00000132746	"ENST00000530069,ENST00000531248,ENST00000534425,ENST00000525827,ENST00000528756,ENST00000531881,ENST00000533962,ENST00000349015"	"ENSP00000431595,ENSP00000435476,ENSP00000433718,ENSP00000433466,ENSP00000255084"
ALDH3B2	0.225376	0.373212	0.798652	0.0373816	0.954708	0.0529367	PH_hs_0004918	"Homo sapiens aldehyde dehydrogenase 3 family, member B2 (ALDH3B2)"	1	222	"NM_001031615,NM_000695"	"NP_001026786.1,NP_000686.2"	ENSG00000132746	"ENST00000530069,ENST00000531248,ENST00000534425,ENST00000525827,ENST00000528756,ENST00000531881,ENST00000533962,ENST00000349015"	"ENSP00000431595,ENSP00000435476,ENSP00000433718,ENSP00000433466,ENSP00000255084"
ALDH7A1	-0.028966	0.808445	0.425518	0.014796	-0.0914391	0.612453	PH_hs_0023731	"Homo sapiens aldehyde dehydrogenase 7 family, member A1 (ALDH7A1)"	1	501	"NM_001202404,NM_001201377,NM_001182"	"NP_001189333.1,NP_001188306.1,NP_001173.2"	ENSG00000164904	"ENST00000409134,ENST00000553117,ENST00000485852,ENST00000497231,ENST00000476328,ENST00000503281,ENST00000509459,ENST00000433026,ENST00000413020,ENST00000458249,ENST00000510111,ENST00000511266,ENST00000509270,ENST00000479989,ENST00000412186,ENST00000447989"	"ENSP00000387123,ENSP00000448593,ENSP00000488032,ENSP00000487998,ENSP00000487936,ENSP00000403929,ENSP00000447388,ENSP00000449318,ENSP00000414536,ENSP00000414132"
ALDOA	0.252196	0.14561	-0.738145	0.223527	-0.899615	0.0088568	PH_hs_0028065	"Homo sapiens aldolase A, fructose-bisphosphate (ALDOA)"	1	226	NM_000034	NP_000025.1	ENSG00000149925	"ENST00000338110,ENST00000395248,ENST00000575627,ENST00000566897,ENST00000568435,ENST00000562240,ENST00000566280,ENST00000567249,ENST00000562302,ENST00000562168,ENST00000569545,ENST00000563060,ENST00000564521,ENST00000412304,ENST00000563987,ENST00000564546,ENST00000564595,ENST00000567555,ENST00000569798,ENST00000395240,ENST00000566012,ENST00000566846,ENST00000562679,ENST00000564688,ENST0000056614…	"ENSP00000336927,ENSP00000378669,ENSP00000455724,ENSP00000457683,ENSP00000456020,ENSP00000455700,ENSP00000455800,ENSP00000400452,ENSP00000457643,ENSP00000455917,ENSP00000457468,ENSP00000455857,ENSP00000378661,ENSP00000454499,ENSP00000455455,ENSP00000457514,ENSP00000456098,ENSP00000485952"
ALG11	0.323966	0.119433	-0.0888866	0.427965	-0.222236	0.0445656	PH_hs_0060168	"Homo sapiens ALG11, alpha-1,2-mannosyltransferase (ALG11)"	1	440138	NM_001004127	NP_001004127.2	ENSG00000253710	"ENST00000523764,ENST00000616513,ENST00000521508,ENST00000519151"	"ENSP00000429497,ENSP00000481922,ENSP00000430236"
ALG9	-0.470552	0.190009	-0.255248	0.0444409	-0.00990616	0.952158	PH_hs_0027226	"Homo sapiens ALG9, alpha-1,2-mannosyltransferase (ALG9)"	1	79796	"NM_001077692,NM_001077691,NM_001077690,NM_024740"	"NP_001071160.1,NP_001071159.1,NP_001071158.1,NP_079016.2"	ENSG00000086848	"ENST00000532425,ENST00000527212,ENST00000614444,ENST00000526272,ENST00000619129,ENST00000524671,ENST00000531154,ENST00000398006,ENST00000616540,ENST00000525910,ENST00000530851,ENST00000613181,ENST00000527294,ENST00000527714,ENST00000618252,ENST00000612489,ENST00000530723"	"ENSP00000432442,ENSP00000484200,ENSP00000480661,ENSP00000436798,ENSP00000435517,ENSP00000381090,ENSP00000482437,ENSP00000437211,ENSP00000479335,ENSP00000482975,ENSP00000478246"
ALK	0.404128	0.029687	0.626365	0.0829195	0.98995	0.0013629	PH_hs_0024837	Homo sapiens anaplastic lymphoma receptor tyrosine kinase (ALK)	1	238	NM_004304	NP_004295.2	ENSG00000171094	"ENST00000389048,ENST00000453137,ENST00000498037,ENST00000431873,ENST00000618119"	"ENSP00000373700,ENSP00000387488,ENSP00000414027,ENSP00000482733"
ALK	0.404128	0.029687	0.626365	0.0829195	0.98995	0.0013629	PH_hs_0024837	Homo sapiens anaplastic lymphoma receptor tyrosine kinase (ALK)	1	238	NM_004304	NP_004295.2	ENSG00000171094	"ENST00000389048,ENST00000453137,ENST00000498037,ENST00000431873,ENST00000618119"	"ENSP00000373700,ENSP00000387488,ENSP00000414027,ENSP00000482733"
ALKBH1	-0.276504	0.0283734	-0.203019	0.138337	-0.120368	0.372252	PH_hs_0048174	"Homo sapiens alkB, alkylation repair homolog 1 (E. coli)"	1	8846	NM_006020	NP_006011.2	ENSG00000100601	"ENST00000216489,ENST00000557057,ENST00000555100,ENST00000554097"	"ENSP00000216489,ENSP00000451886,ENSP00000451386"
ALOX12	0.0227356	0.964732	0.176248	0.510942	1.0969	0.0323772	PH_hs_0000160	Homo sapiens arachidonate 12-lipoxygenase (ALOX12)	1	239	NM_000697	NP_000688.2	ENSG00000108839	"ENST00000251535,ENST00000480801,ENST00000406228"	"ENSP00000251535,ENSP00000467033"
ALOX15B	-0.46445	0.0160624	-0.0200516	0.949255	-0.360268	0.327476	PH_hs_0006111	"Homo sapiens arachidonate 15-lipoxygenase, type B (ALOX15B)"	1	247	"NM_001141,NM_001039131,NM_001039130"	"NP_001132.2,NP_001034220.1,NP_001034219.1"	ENSG00000179593	"ENST00000380183,ENST00000572022,ENST00000571240,ENST00000573359,ENST00000380173"	"ENSP00000369530,ENSP00000458749,ENSP00000460332,ENSP00000369520"
ALPI	-0.348584	0.469849	-1.34885	0.242821	-1.92183	0.000321191	PH_hs_0002926	"Homo sapiens alkaline phosphatase, intestinal (ALPI)"	1	248	NM_001631	NP_001622.2	ENSG00000163295	"ENST00000295463,ENST00000457560"	"ENSP00000295463,ENSP00000413068"
ALPK3	-0.514413	0.0307847	-0.615398	0.293037	-1.1594	0.0573141	PH_hs_0015524	Homo sapiens alpha-kinase 3 (ALPK3)	1	57538	NM_020778	NP_065829.3	ENSG00000136383	"ENST00000258888,ENST00000558077"	ENSP00000258888
ALX3	-0.0504422	0.911376	-1.10036	0.0221364	-0.511835	0.462817	PH_hs_0042479	Homo sapiens ALX homeobox 3 (ALX3)	1	257	NM_006492	NP_006483.2	ENSG00000156150	ENST00000369792	ENSP00000358807
ALX4	-0.398808	0.0562466	-0.611083	0.022854	-0.213738	0.343958	PH_hs_0015596	Homo sapiens ALX homeobox 4 (ALX4)	1	60529	NM_021926	NP_068745.2	ENSG00000052850	ENST00000329255	ENSP00000332744
AMER2	0.389641	0.0390861	-0.0835406	0.806247	-0.101552	0.857448	PH_hs_0029060	Homo sapiens APC membrane recruitment protein 2 (AMER2)	1	219287	"NM_199138,NM_152704"	"NP_954589.1,NP_689917.2"	ENSG00000165566	"ENST00000357816,ENST00000515384"	"ENSP00000350469,ENSP00000426528"
AMIGO3	0.172459	0.269293	0.551475	0.0542354	0.596956	0.0284175	PH_hs_0034955	Homo sapiens adhesion molecule with Ig-like domain 3 (AMIGO3)	1	386724	NM_198722	NP_942015.1	ENSG00000176020	ENST00000320431	ENSP00000323096
AMIGO3	0.172459	0.269293	0.551475	0.0542354	0.596956	0.0284175	PH_hs_0034955	Homo sapiens adhesion molecule with Ig-like domain 3 (AMIGO3)	1	386724	NM_198722	NP_942015.1	ENSG00000176020	ENST00000320431	ENSP00000323096
AMOTL1	0.0430624	0.724002	0.241915	0.0304717	-0.133865	0.783764	PH_hs_0048921	Homo sapiens angiomotin like 1 (AMOTL1)	1	154810	NM_130847	NP_570899.1	ENSG00000166025	"ENST00000299004,ENST00000317829,ENST00000433060,ENST00000539727,ENST00000537191"	"ENSP00000299004,ENSP00000320968,ENSP00000387739"
AMPD1	0.248222	0.166728	0.818698	0.00515876	0.657845	0.00364372	PH_hs_0004998	Homo sapiens adenosine monophosphate deaminase 1 (AMPD1)	1	270	"NM_000036,NM_001172626"	"NP_000027.2,NP_001166097.1"	ENSG00000116748	"ENST00000520113,ENST00000369538,ENST00000485564"	"ENSP00000430075,ENSP00000358551"
AMPD1	0.248222	0.166728	0.818698	0.00515876	0.657845	0.00364372	PH_hs_0004998	Homo sapiens adenosine monophosphate deaminase 1 (AMPD1)	1	270	"NM_000036,NM_001172626"	"NP_000027.2,NP_001166097.1"	ENSG00000116748	"ENST00000520113,ENST00000369538,ENST00000485564"	"ENSP00000430075,ENSP00000358551"
AMTN	-0.350878	0.254819	0.378264	0.0402439	1.06732	0.00156642	PH_hs_0033825	Homo sapiens amelotin (AMTN)	1	401138	NM_212557	NP_997722.1	ENSG00000187689	"ENST00000339336,ENST00000504451"	"ENSP00000341013,ENSP00000422452"
AMTN	-0.350878	0.254819	0.378264	0.0402439	1.06732	0.00156642	PH_hs_0033825	Homo sapiens amelotin (AMTN)	1	401138	NM_212557	NP_997722.1	ENSG00000187689	"ENST00000339336,ENST00000504451"	"ENSP00000341013,ENSP00000422452"
AMY1A|AMY1C|AMY1B|AMY2A|AMY2B	0.333857	0.0142415	-0.163073	0.546488	0.0554395	0.666859	PH_hs_0062080	"Homo sapiens amylase, alpha 1A (salivary)|Homo sapiens amylase, alpha 1C (salivary)|Homo sapiens amylase, alpha 1B (salivary)|Homo sapiens amylase, alpha 2A (pancreatic)|Homo sapiens amylase, alpha 2B (pancreatic)"	4	276|278|277|279|280	"NM_001008221,NM_004038|NM_001008219|NM_001008218|NM_000699|NM_020978"	"NP_001008222.1,NP_004029.2|NP_001008220.1|NP_001008219.1|NP_000690.1|NP_066188.1"	ENSG00000237763|ENSG00000187733|ENSG00000174876|ENSG00000243480|ENSG00000240038	"ENST00000430659,ENST00000370083,ENST00000422549,ENST00000461518,ENST00000494409|ENST00000370079|ENST00000370080,ENST00000464691,ENST00000446703,ENST00000425410,ENST00000330330|ENST00000414303,ENST00000423678,ENST00000497748,ENST00000622339|ENST00000477657,ENST00000361355,ENST00000435302,ENST00000453959,ENST00000491397,ENST00000462971,ENST00000481821,ENST00000610648"	"ENSP00000399836,ENSP00000359100,ENSP00000408386|ENSP00000359096|ENSP00000359097,ENSP00000390219,ENSP00000393584,ENSP00000330484|ENSP00000397582,ENSP00000390832,ENSP00000481450|ENSP00000433347,ENSP00000354610,ENSP00000391423,ENSP00000401627,ENSP00000481588"
AMZ2P1	-0.164526	0.286523	-0.48562	0.385009	-1.01295	0.00471803	PH_hs_0024561	Homo sapiens archaelysin family metallopeptidase 2 pseudogene 1 (AMZ2P1)	1	201283	NR_026903	-	ENSG00000214174	"ENST00000430983,ENST00000397713,ENST00000565833"
ANAPC11	0.11193	0.520337	0.338412	0.120241	0.409018	0.0310963	PH_hs_0044494	Homo sapiens anaphase promoting complex subunit 11 (ANAPC11)	1	51529	"NM_001002249,NM_001002248,NM_001002247,NM_001002246,NM_001002245,NM_001002244,NM_016476"	"NP_001002249.1,NP_001002248.1,NP_001002247.1,NP_001002246.1,NP_001002245.1,NP_001002244.1,NP_057560.8"	ENSG00000141552	"ENST00000571570,ENST00000572639,ENST00000579978,ENST00000344877,ENST00000582222,ENST00000577425,ENST00000571024,ENST00000574924,ENST00000572851,ENST00000357385,ENST00000584314,ENST00000571874,ENST00000578550,ENST00000577747,ENST00000579133,ENST00000392376,ENST00000584197,ENST00000583839,ENST00000578544,ENST00000575195,ENST00000585259,ENST00000573956,ENST00000612413"	"ENSP00000458143,ENSP00000460678,ENSP00000463640,ENSP00000339695,ENSP00000464403,ENSP00000462691,ENSP00000461648,ENSP00000460064,ENSP00000458265,ENSP00000349957,ENSP00000462250,ENSP00000459200,ENSP00000464615,ENSP00000463567,ENSP00000463889,ENSP00000376181,ENSP00000464519,ENSP00000463598,ENSP00000463357,ENSP00000458515,ENSP00000462527,ENSP00000484031"
ANAPC7	-0.276181	0.379481	-0.147141	0.773944	1.12745	0.000961014	PH_hs_0048238	Homo sapiens anaphase promoting complex subunit 7 (ANAPC7)	1	51434	NM_016238	NP_057322.2	ENSG00000196510	"ENST00000455511,ENST00000481473,ENST00000552087,ENST00000486321,ENST00000452721,ENST00000450008,ENST00000471602,ENST00000547199,ENST00000548234,ENST00000546720,ENST00000552170,ENST00000464697"	"ENSP00000394394,ENSP00000450293,ENSP00000402314,ENSP00000450405"
ANGPT1	0.0799605	0.738677	0.233758	0.050515	-0.248256	0.496903	PH_hs_0000329	Homo sapiens angiopoietin 1 (ANGPT1)	1	284	"NM_001146,NM_001199859"	"NP_001137.2,NP_001186788.1"	ENSG00000154188	"ENST00000517746,ENST00000297450,ENST00000520734,ENST00000520052,ENST00000518386,ENST00000521950,ENST00000522400,ENST00000520033"	"ENSP00000428340,ENSP00000297450,ENSP00000430750,ENSP00000429349,ENSP00000428908"
ANGPT2	0.124096	0.573813	0.55597	0.196892	0.460754	0.0508745	PH_hs_0006312	Homo sapiens angiopoietin 2 (ANGPT2)	1	285	"NM_001118888,NM_001118887,NM_001147"	"NP_001112360.1,NP_001112359.1,NP_001138.1"	ENSG00000091879	"ENST00000325203,ENST00000629816,ENST00000338312,ENST00000523120"	"ENSP00000314897,ENSP00000486858,ENSP00000343517,ENSP00000428023"
ANHX	-0.601865	0.484368	-2.01277	0.0403232	-0.975141	0.198064	PH_hs_0044035	Homo sapiens anomalous homeobox (ANHX)	1	647589	NM_001191054	NP_001177983.1	ENSG00000227059	"ENST00000545940,ENST00000419717"	"ENSP00000439513,ENSP00000409950"
ANK1	0.00866572	0.987608	-1.7763	0.0106772	-0.363018	0.690623	PH_hs_0021286	"Homo sapiens ankyrin 1, erythrocytic (ANK1)"	1	286	"NM_020480,NM_020478,NM_001142446,NM_001142445,NM_020476,NM_000037,NM_020477,NM_020475"	"NP_065213.2,NP_065211.2,NP_001135918.1,NP_001135917.1,NP_065209.2,NP_000028.3,NP_065210.2,NP_065208.2"	ENSG00000029534	"ENST00000347528,ENST00000289734,ENST00000522231,ENST00000522543,ENST00000314214,ENST00000520299,ENST00000265709,ENST00000348036,ENST00000524227,ENST00000335651,ENST00000518715,ENST00000518061,ENST00000524069,ENST00000521407"	"ENSP00000339620,ENSP00000289734,ENSP00000428750,ENSP00000430368,ENSP00000319123,ENSP00000430174,ENSP00000265709,ENSP00000297744,ENSP00000335031,ENSP00000428315"
ANK2	0.211023	0.721611	0.560009	0.0579487	1.06374	0.0264422	PH_hs_0040937	"Homo sapiens ankyrin 2, neuronal (ANK2)"	1	287	NM_001148	NP_001139.3	ENSG00000145362	"ENST00000503271,ENST00000503423,ENST00000506722,ENST00000504454,ENST00000514246,ENST00000394537,ENST00000357077,ENST00000264366,ENST00000508613,ENST00000512999,ENST00000511380,ENST00000515034,ENST00000509550,ENST00000502701,ENST00000515644,ENST00000514960,ENST00000514160,ENST00000504887,ENST00000504415,ENST00000510275,ENST00000508007,ENST00000512298,ENST00000505342,ENST00000506344,ENST0000051416…	"ENSP00000423799,ENSP00000421011,ENSP00000421067,ENSP00000424722,ENSP00000378044,ENSP00000349588,ENSP00000264366,ENSP00000422900,ENSP00000425775,ENSP00000421059,ENSP00000426944,ENSP00000422853,ENSP00000426994,ENSP00000421023,ENSP00000422498,ENSP00000422888,ENSP00000422486,ENSP00000482888"
ANKMY1	0.157497	0.762611	0.45078	0.191269	0.723716	0.0426792	PH_hs_0025376	Homo sapiens ankyrin repeat and MYND domain containing 1 (ANKMY1)	1	51281	"NM_017844,NM_016552"	"NP_060314.2,NP_057636.2"	ENSG00000144504	"ENST00000373318,ENST00000406958,ENST00000272972,ENST00000361678,ENST00000403283,ENST00000401804,ENST00000407275,ENST00000489677,ENST00000391988,ENST00000405523,ENST00000405002,ENST00000480230,ENST00000484526,ENST00000459901,ENST00000496300,ENST00000441168,ENST00000443318,ENST00000462004,ENST00000418708,ENST00000418505,ENST00000464991,ENST00000477316,ENST00000411765,ENST00000391987"	"ENSP00000362415,ENSP00000384555,ENSP00000272972,ENSP00000355097,ENSP00000383968,ENSP00000385887,ENSP00000385267,ENSP00000375848,ENSP00000385635,ENSP00000385145,ENSP00000405938,ENSP00000404095,ENSP00000407015,ENSP00000404337,ENSP00000375847"
ANKRD16	0.133558	0.51365	-0.231241	0.0900318	-0.566545	0.0469564	PH_hs_0048650	Homo sapiens ankyrin repeat domain 16 (ANKRD16)	1	54522	NM_019046	NP_061919.1	ENSG00000134461	"ENST00000380094,ENST00000380092,ENST00000191063,ENST00000492368"	"ENSP00000369436,ENSP00000369434,ENSP00000352361"
ANKRD16	0.0851697	0.293655	0.0187756	0.840352	-0.196123	0.0456432	PH_hs_0023519	Homo sapiens ankyrin repeat domain 16 (ANKRD16)	1	54522	"NM_001009943,NM_001009941"	"NP_001009943.1,NP_001009941.1"	ENSG00000134461	"ENST00000380094,ENST00000380092,ENST00000191063,ENST00000492368"	"ENSP00000369436,ENSP00000369434,ENSP00000352361"
ANKRD17	0.144336	0.531565	-0.946666	0.000761335	-0.891466	0.00151961	PH_hs_0061502	Homo sapiens ankyrin repeat domain 17 (ANKRD17)	1	26057	"NM_198889,NM_032217"	"NP_942592.1,NP_115593.3"	ENSG00000132466	"ENST00000358602,ENST00000558247,ENST00000509867,ENST00000330838,ENST00000510127,ENST00000513908,ENST00000560507,ENST00000561029,ENST00000514252,ENST00000559367"	"ENSP00000351416,ENSP00000453434,ENSP00000427151,ENSP00000332265,ENSP00000453294"
ANKRD17	0.144336	0.531565	-0.946666	0.000761335	-0.891466	0.00151961	PH_hs_0061502	Homo sapiens ankyrin repeat domain 17 (ANKRD17)	1	26057	"NM_198889,NM_032217"	"NP_942592.1,NP_115593.3"	ENSG00000132466	"ENST00000358602,ENST00000558247,ENST00000509867,ENST00000330838,ENST00000510127,ENST00000513908,ENST00000560507,ENST00000561029,ENST00000514252,ENST00000559367"	"ENSP00000351416,ENSP00000453434,ENSP00000427151,ENSP00000332265,ENSP00000453294"
ANKRD18DP	-0.222834	0.309238	-0.537374	0.0149223	-0.587544	0.149707	PH_hs_0046369	"Homo sapiens ankyrin repeat domain 18D, pseudogene (ANKRD18DP)"	1	348840	NR_003291	-	ENSG00000281617	"ENST00000627510,ENST00000626596,ENST00000628654,ENST00000625853,ENST00000627348"
ANKRD18DP	-0.114258	0.716367	-0.0160709	0.890282	0.21716	0.0267045	PH_hs_0034274	"Homo sapiens ankyrin repeat domain 18D, pseudogene (ANKRD18DP)"	1	348840	NR_003291	-	ENSG00000281617	"ENST00000627510,ENST00000626596,ENST00000628654,ENST00000625853,ENST00000627348"
ANKRD22	0.465793	0.0108	0.127286	0.151439	-0.302985	0.0483855	PH_hs_0012389	Homo sapiens ankyrin repeat domain 22 (ANKRD22)	1	118932	NM_144590	NP_653191.2	ENSG00000152766	"ENST00000371930,ENST00000476963"	ENSP00000360998
ANKRD22	0.465793	0.0108	0.127286	0.151439	-0.302985	0.0483855	PH_hs_0012389	Homo sapiens ankyrin repeat domain 22 (ANKRD22)	1	118932	NM_144590	NP_653191.2	ENSG00000152766	"ENST00000371930,ENST00000476963"	ENSP00000360998
ANKRD24	0.232114	0.0651241	0.497851	0.0071316	0.752339	0.00500361	PH_hs_0022962	Homo sapiens ankyrin repeat domain 24 (ANKRD24)	1	170961	NM_133475	NP_597732.1	ENSG00000089847	"ENST00000600132,ENST00000597689,ENST00000262970,ENST00000595928,ENST00000595096,ENST00000318934"	"ENSP00000471252,ENSP00000470227,ENSP00000262970,ENSP00000471346,ENSP00000321731"
ANKRD24	0.232114	0.0651241	0.497851	0.0071316	0.752339	0.00500361	PH_hs_0022962	Homo sapiens ankyrin repeat domain 24 (ANKRD24)	1	170961	NM_133475	NP_597732.1	ENSG00000089847	"ENST00000600132,ENST00000597689,ENST00000262970,ENST00000595928,ENST00000595096,ENST00000318934"	"ENSP00000471252,ENSP00000470227,ENSP00000262970,ENSP00000471346,ENSP00000321731"
ANKRD31	-0.0989433	0.853047	-0.0886131	0.850537	0.775465	0.035762	PH_hs_0003860	Homo sapiens ankyrin repeat domain 31 (ANKRD31)	1	256006	NM_001164443	NP_001157915.1	ENSG00000145700	"ENST00000504022,ENST00000506364,ENST00000274361"	"ENSP00000427262,ENSP00000274361"
ANKRD33	0.137426	0.187158	0.370752	0.0371336	0.232142	0.0967956	PH_hs_0020126	Homo sapiens ankyrin repeat domain 33 (ANKRD33)	1	341405	"NM_001130015,NM_182608"	"NP_001123487.1,NP_872414.3"	ENSG00000167612	"ENST00000301190,ENST00000549751,ENST00000548383,ENST00000548526,ENST00000340970,ENST00000547119,ENST00000549316,ENST00000550652"	"ENSP00000301190,ENSP00000448116,ENSP00000344690"
ANKRD35	0.224741	0.0531493	0.126985	0.394196	-0.0173275	0.814033	PH_hs_0007996	Homo sapiens ankyrin repeat domain 35 (ANKRD35)	1	148741	NM_144698	NP_653299.4	ENSG00000198483	"ENST00000355594,ENST00000544626"	"ENSP00000347802,ENSP00000442671"
ANKRD60	0.0156389	0.985348	0.457184	0.204194	0.979954	0.0197054	PH_hs_0060377	Homo sapiens ankyrin repeat domain 60 (ANKRD60)	1	140731	NM_001304369	NP_001291298.1	ENSG00000124227	ENST00000457363	ENSP00000396747
ANKS1A	-0.325682	0.0537311	-0.15466	0.212121	-0.00924138	0.929557	PH_hs_0020405	Homo sapiens ankyrin repeat and sterile alpha motif domain containing 1A (ANKS1A)	1	23294	NM_015245	NP_056060.2	ENSG00000064999	"ENST00000360359,ENST00000470698"	ENSP00000353518
ANKS1B	0.187027	0.317096	0.404842	0.0240726	0.452751	0.0192999	PH_hs_0018034	Homo sapiens ankyrin repeat and sterile alpha motif domain containing 1B (ANKS1B)	1	56899	"NM_001204080,NM_001204079,NM_001204065,NM_001204070,NM_001204069,NM_001204068,NM_001204067,NM_001204066,NM_181670"	"NP_001191009.1,NP_001191008.1,NP_001190994.1,NP_001190999.1,NP_001190998.1,NP_001190997.1,NP_001190996.1,NP_001190995.1,NP_858056.2"	ENSG00000185046	"ENST00000555119,ENST00000341752,ENST00000549558,ENST00000547776,ENST00000551212,ENST00000547010,ENST00000550693,ENST00000549025,ENST00000549493,ENST00000547446,ENST00000333732,ENST00000550778,ENST00000547362,ENST00000546568,ENST00000546960,ENST00000549315,ENST00000546364,ENST00000552407,ENST00000549797,ENST00000551613,ENST00000551830,ENST00000551560,ENST00000552748,ENST00000548447,ENST0000055224…	"ENSP00000452523,ENSP00000345510,ENSP00000448993,ENSP00000449629,ENSP00000448512,ENSP00000447999,ENSP00000447312,ENSP00000448203,ENSP00000450015,ENSP00000331256,ENSP00000448744,ENSP00000473277,ENSP00000448205,ENSP00000447839,ENSP00000473522,ENSP00000473331,ENSP00000473300,ENSP00000473513,ENSP00000473673,ENSP00000473434,ENSP00000473517,ENSP00000449894,ENSP00000331381"
ANKS1B	0.187027	0.317096	0.404842	0.0240726	0.452751	0.0192999	PH_hs_0018034	Homo sapiens ankyrin repeat and sterile alpha motif domain containing 1B (ANKS1B)	1	56899	"NM_001204080,NM_001204079,NM_001204065,NM_001204070,NM_001204069,NM_001204068,NM_001204067,NM_001204066,NM_181670"	"NP_001191009.1,NP_001191008.1,NP_001190994.1,NP_001190999.1,NP_001190998.1,NP_001190997.1,NP_001190996.1,NP_001190995.1,NP_858056.2"	ENSG00000185046	"ENST00000555119,ENST00000341752,ENST00000549558,ENST00000547776,ENST00000551212,ENST00000547010,ENST00000550693,ENST00000549025,ENST00000549493,ENST00000547446,ENST00000333732,ENST00000550778,ENST00000547362,ENST00000546568,ENST00000546960,ENST00000549315,ENST00000546364,ENST00000552407,ENST00000549797,ENST00000551613,ENST00000551830,ENST00000551560,ENST00000552748,ENST00000548447,ENST0000055224…	"ENSP00000452523,ENSP00000345510,ENSP00000448993,ENSP00000449629,ENSP00000448512,ENSP00000447999,ENSP00000447312,ENSP00000448203,ENSP00000450015,ENSP00000331256,ENSP00000448744,ENSP00000473277,ENSP00000448205,ENSP00000447839,ENSP00000473522,ENSP00000473331,ENSP00000473300,ENSP00000473513,ENSP00000473673,ENSP00000473434,ENSP00000473517,ENSP00000449894,ENSP00000331381"
ANO2	-0.349854	0.215958	-0.132179	0.474654	-0.22246	0.048012	PH_hs_0003999	"PREDICTED: Homo sapiens anoctamin 2, calcium activated chloride channel (ANO2)"	1	57101	"XM_011520985,XM_011520984,XM_011520983,XM_011520982,XM_011520981,XM_011520980,XM_011520979,XM_011520978,XM_011520977,XM_011520976,XM_011520975,XM_006718991,XM_006718990,XM_006718988,NM_001278597,NM_001278596"	"XP_011519287.1,XP_011519286.1,XP_011519285.1,XP_011519284.1,XP_011519283.1,XP_011519282.1,XP_011519281.1,XP_011519280.1,XP_011519279.1,XP_011519278.1,XP_011519277.1,XP_006719054.1,XP_006719053.1,XP_006719051.1,NP_001265526.1,NP_001265525.1"	ENSG00000047617	"ENST00000536751,ENST00000356134,ENST00000541874,ENST00000545860,ENST00000542326,ENST00000538154,ENST00000540543,ENST00000544988,ENST00000541487,ENST00000327087,ENST00000612575,ENST00000546188"	"ENSP00000348453,ENSP00000443813,ENSP00000314048,ENSP00000481449,ENSP00000440981"
ANO7	-0.513602	0.193522	-1.27754	0.000523297	-0.733179	0.135006	PH_hs_0044568	Homo sapiens anoctamin 7 (ANO7)	1	50636	NM_001001666	NP_001001666.1	ENSG00000146205	"ENST00000402530,ENST00000274979,ENST00000402430,ENST00000475532,ENST00000471606,ENST00000451047,ENST00000487192,ENST00000481071,ENST00000459928"	"ENSP00000383985,ENSP00000274979,ENSP00000385418,ENSP00000403625"
ANO8	0.0978561	0.584502	0.513418	0.0432963	0.48574	0.0631391	PH_hs_0019747	Homo sapiens anoctamin 8 (ANO8)	1	57719	NM_020959	NP_066010.1	ENSG00000074855	"ENST00000597643,ENST00000159087,ENST00000600711,ENST00000630631"	"ENSP00000469751,ENSP00000159087,ENSP00000486865"
ANO9	0.341629	0.555385	0.669975	0.0984046	0.937922	0.047737	PH_hs_0015945	Homo sapiens anoctamin 9 (ANO9)	1	338440	NM_001012302	NP_001012302.2	ENSG00000185101	"ENST00000526142,ENST00000534161,ENST00000532094,ENST00000528927,ENST00000332826,ENST00000524802,ENST00000525804,ENST00000525857"	ENSP00000332788
ANXA1	1.04957	0.00232598	0.28357	0.198048	-0.173952	0.328718	PH_hs_0023492	Homo sapiens annexin A1 (ANXA1)	1	301	NM_000700	NP_000691.1	ENSG00000135046	"ENST00000257497,ENST00000468639,ENST00000456643,ENST00000415424,ENST00000376911,ENST00000495713,ENST00000489109,ENST00000491192"	"ENSP00000257497,ENSP00000412489,ENSP00000414013,ENSP00000366109"
ANXA3	-0.0429586	0.856667	0.618247	0.037263	0.396492	0.100733	PH_hs_0021146	Homo sapiens annexin A3 (ANXA3)	1	306	NM_005139	NP_005130.1	ENSG00000138772	"ENST00000264908,ENST00000512884,ENST00000512542,ENST00000503570,ENST00000510502,ENST00000512373,ENST00000514171,ENST00000508214,ENST00000505805,ENST00000503776"	"ENSP00000264908,ENSP00000423068,ENSP00000426591,ENSP00000421015,ENSP00000424584,ENSP00000421512,ENSP00000422281"
AOC2	-0.0395664	0.868399	0.508456	0.0411914	0.77154	0.364686	PH_hs_0044469	"Homo sapiens amine oxidase, copper containing 2 (retina-specific)"	1	314	"NM_009590,NM_001158"	"NP_033720.2,NP_001149.2"	ENSG00000131480	"ENST00000253799,ENST00000452774"	"ENSP00000253799,ENSP00000406134"
AOX1	-0.1545	0.886283	-2.51617	0.0320766	-1.07241	0.389529	PH_hs_0019257	Homo sapiens aldehyde oxidase 1 (AOX1)	1	316	NM_001159	NP_001150.3	ENSG00000138356	"ENST00000374700,ENST00000454629,ENST00000485965,ENST00000465297,ENST00000485106,ENST00000472553,ENST00000260930,ENST00000439380"	"ENSP00000363832,ENSP00000392485,ENSP00000260930,ENSP00000413326"
AP1G1	-0.265248	0.0541821	-0.213255	0.0707883	-0.0560279	0.717561	PH_hs_0027056	"Homo sapiens adaptor-related protein complex 1, gamma 1 subunit (AP1G1)"	1	164	"NM_001128,NM_001030007"	"NP_001119.3,NP_001025178.1"	ENSG00000166747	"ENST00000299980,ENST00000564155,ENST00000569748,ENST00000570052,ENST00000393512,ENST00000565009,ENST00000565642,ENST00000562934,ENST00000568327,ENST00000566179,ENST00000569044,ENST00000450149,ENST00000563259,ENST00000563104,ENST00000569185,ENST00000566161,ENST00000567583,ENST00000565412,ENST00000569975,ENST00000570297,ENST00000570017,ENST00000565161"	"ENSP00000299980,ENSP00000454219,ENSP00000454523,ENSP00000377148,ENSP00000457726,ENSP00000454970,ENSP00000454932,ENSP00000405836,ENSP00000456058,ENSP00000454713,ENSP00000456316,ENSP00000457927,ENSP00000456493,ENSP00000454717,ENSP00000455400"
AP3S1	-0.304476	0.119317	-0.303454	0.0431563	-0.131511	0.24677	PH_hs_0043398	"Homo sapiens adaptor-related protein complex 3, sigma 1 subunit (AP3S1)"	1	1176	NM_001284	NP_001275.1	ENSG00000177879	"ENST00000316788,ENST00000514118,ENST00000515066,ENST00000506430,ENST00000395548,ENST00000509055,ENST00000507436,ENST00000505423"	"ENSP00000325369,ENSP00000446179"
APBA3	-0.162169	0.565967	-0.266911	0.0457401	-0.264442	0.0684356	PH_hs_0001582	Homo sapiens amyloid beta (A4)	1	9546	NM_004886	NP_004877.1	ENSG00000011132	"ENST00000588984,ENST00000590064,ENST00000316757,ENST00000591678,ENST00000586991,ENST00000592826,ENST00000590238,ENST00000589934"	ENSP00000315136
APCDD1L	-0.16694	0.674712	0.311897	0.721112	0.775565	0.00208602	PH_hs_0006583	Homo sapiens adenomatosis polyposis coli down-regulated 1-like (APCDD1L)	1	164284	NM_153360	NP_699191.1	ENSG00000198768	"ENST00000371149,ENST00000491015,ENST00000425773"	"ENSP00000360191,ENSP00000396856"
APITD1|APITD1-CORT	-0.279436	0.2368	-0.318679	0.0438387	-0.319156	0.0403127	PH_hs_0062029	"Homo sapiens apoptosis-inducing, TAF9-like domain 1 (APITD1)|Homo sapiens APITD1-CORT readthrough (APITD1-CORT)"	4	378708|100526739	"NM_199294,NR_036462|NM_001270517"	"NP_954988.1,-|NP_001257446.1"	ENSG00000175279|ENSG00000251503	"ENST00000309048,ENST00000602486,ENST00000477755,ENST00000462462,ENST00000464507|ENST00000400900,ENST00000470413,ENST00000465026,ENST00000602446,ENST00000602296,ENST00000602787"	"ENSP00000308583,ENSP00000468629|ENSP00000383692,ENSP00000433615,ENSP00000473279,ENSP00000473401,ENSP00000473509"
APITD1|APITD1-CORT	-0.279436	0.2368	-0.318679	0.0438387	-0.319156	0.0403127	PH_hs_0062029	"Homo sapiens apoptosis-inducing, TAF9-like domain 1 (APITD1)|Homo sapiens APITD1-CORT readthrough (APITD1-CORT)"	4	378708|100526739	"NM_199294,NR_036462|NM_001270517"	"NP_954988.1,-|NP_001257446.1"	ENSG00000175279|ENSG00000251503	"ENST00000309048,ENST00000602486,ENST00000477755,ENST00000462462,ENST00000464507|ENST00000400900,ENST00000470413,ENST00000465026,ENST00000602446,ENST00000602296,ENST00000602787"	"ENSP00000308583,ENSP00000468629|ENSP00000383692,ENSP00000433615,ENSP00000473279,ENSP00000473401,ENSP00000473509"
APLNR	-0.59593	0.294111	-2.51845	0.0144455	-2.48633	0.000150887	PH_hs_0020741	Homo sapiens apelin receptor (APLNR)	1	187	"NM_005161,NR_027991"	"NP_005152.1,-"	ENSG00000134817	"ENST00000257254,ENST00000606794,ENST00000611099"	"ENSP00000257254,ENSP00000475344,ENSP00000477818"
APLNR	-0.59593	0.294111	-2.51845	0.0144455	-2.48633	0.000150887	PH_hs_0020741	Homo sapiens apelin receptor (APLNR)	1	187	"NM_005161,NR_027991"	"NP_005152.1,-"	ENSG00000134817	"ENST00000257254,ENST00000606794,ENST00000611099"	"ENSP00000257254,ENSP00000475344,ENSP00000477818"
APLP1	-0.224443	0.209028	0.292136	0.450777	0.847003	0.0210519	PH_hs_0027149	Homo sapiens amyloid beta (A4)	1	333	"NM_005166,NM_001024807"	"NP_005157.1,NP_001019978.1"	ENSG00000105290	"ENST00000537454,ENST00000221891,ENST00000590561,ENST00000586861,ENST00000589743,ENST00000592316,ENST00000588808,ENST00000589298,ENST00000587274,ENST00000590926,ENST00000591165"	"ENSP00000441501,ENSP00000221891,ENSP00000466623,ENSP00000465694,ENSP00000466116,ENSP00000467854,ENSP00000466576,ENSP00000474762"
APOBEC3A|APOBEC3A_B	0.219943	0.163464	-0.193674	0.339013	-0.453653	0.0142597	PH_hs_0035812	"Homo sapiens apolipoprotein B mRNA editing enzyme, catalytic polypeptide-like 3A (APOBEC3A)|Homo sapiens APOBEC3A and APOBEC3B deletion hybrid (APOBEC3A_B)"	4	200315|100913187	NM_145699|NM_001193289	NP_663745.1|NP_001180218.1	ENSG00000262156|ENSG00000262156	ENST00000570508|ENST00000570508	ENSP00000461288|ENSP00000461288
APOBEC3F	-0.226498	0.0942443	-0.246547	0.0804635	-0.282597	0.0418733	PH_hs_0046302	"Homo sapiens apolipoprotein B mRNA editing enzyme, catalytic polypeptide-like 3F (APOBEC3F)"	1	200316	NM_001006666	NP_001006667.1	ENSG00000128394	"ENST00000491387,ENST00000308521,ENST00000381565,ENST00000476513"	"ENSP00000309749,ENSP00000370977"
APOBEC3H	-0.0116012	0.983935	0.471438	0.509444	1.25227	0.00421093	PH_hs_0045602	"Homo sapiens apolipoprotein B mRNA editing enzyme, catalytic polypeptide-like 3H (APOBEC3H)"	1	164668	"NM_181773,NM_001166004,NM_001166003,NM_001166002"	"NP_861438.3,NP_001159476.2,NP_001159475.2,NP_001159474.2"	ENSG00000100298	"ENST00000348946,ENST00000474235,ENST00000401756,ENST00000442487,ENST00000613996,ENST00000613677,ENST00000421988"	"ENSP00000216123,ENSP00000385741,ENSP00000411754,ENSP00000482682,ENSP00000483689,ENSP00000393520"
APOC3	0.145706	0.379946	0.856239	0.00357559	0.601761	0.0034296	PH_hs_0043121	Homo sapiens apolipoprotein C-III (APOC3)	1	345	NM_000040	NP_000031.1	ENSG00000110245	"ENST00000433777,ENST00000227667,ENST00000375345,ENST00000470144,ENST00000630701"	"ENSP00000410614,ENSP00000227667,ENSP00000364494,ENSP00000486182"
APOC3	0.145706	0.379946	0.856239	0.00357559	0.601761	0.0034296	PH_hs_0043121	Homo sapiens apolipoprotein C-III (APOC3)	1	345	NM_000040	NP_000031.1	ENSG00000110245	"ENST00000433777,ENST00000227667,ENST00000375345,ENST00000470144,ENST00000630701"	"ENSP00000410614,ENSP00000227667,ENSP00000364494,ENSP00000486182"
APOD	-1.33388	0.000784086	-0.917033	0.202112	-1.33224	0.000587107	PH_hs_0043428	Homo sapiens apolipoprotein D (APOD)	1	347	NM_001647	NP_001638.1	ENSG00000189058	"ENST00000343267,ENST00000458447,ENST00000421243,ENST00000453131,ENST00000463719"	"ENSP00000345179,ENSP00000391597,ENSP00000415235,ENSP00000393076"
APOD	-1.33388	0.000784086	-0.917033	0.202112	-1.33224	0.000587107	PH_hs_0043428	Homo sapiens apolipoprotein D (APOD)	1	347	NM_001647	NP_001638.1	ENSG00000189058	"ENST00000343267,ENST00000458447,ENST00000421243,ENST00000453131,ENST00000463719"	"ENSP00000345179,ENSP00000391597,ENSP00000415235,ENSP00000393076"
APPBP2	-0.0923128	0.290942	0.0405538	0.558615	0.271492	0.0469644	PH_hs_0004785	Homo sapiens amyloid beta precursor protein (cytoplasmic tail)	1	10513	NM_006380	NP_006371.2	ENSG00000062725	"ENST00000083182,ENST00000589341,ENST00000592995,ENST00000590244,ENST00000588668,ENST00000585368"	"ENSP00000083182,ENSP00000467025,ENSP00000466802,ENSP00000464962"
AQP1	0.055856	0.921709	-0.694315	0.00707047	-0.694315	0.00659934	PH_hs_0044095	Homo sapiens aquaporin 1 (Colton blood group)	1	358	"NM_001185062,NM_001185061,NM_001185060,NM_198098"	"NP_001171991.1,NP_001171990.1,NP_001171989.1,NP_932766.1"	ENSG00000240583	"ENST00000311813,ENST00000482461,ENST00000409899,ENST00000409611,ENST00000441328"	"ENSP00000311165,ENSP00000386712,ENSP00000387178,ENSP00000405698"
AQP1	0.055856	0.921709	-0.694315	0.00707047	-0.694315	0.00659934	PH_hs_0044095	Homo sapiens aquaporin 1 (Colton blood group)	1	358	"NM_001185062,NM_001185061,NM_001185060,NM_198098"	"NP_001171991.1,NP_001171990.1,NP_001171989.1,NP_932766.1"	ENSG00000240583	"ENST00000311813,ENST00000482461,ENST00000409899,ENST00000409611,ENST00000441328"	"ENSP00000311165,ENSP00000386712,ENSP00000387178,ENSP00000405698"
AQP1	0.110839	0.634868	0.633416	0.0265838	0.451441	0.0515753	PH_hs_0028973	Homo sapiens aquaporin 1 (Colton blood group)	1	358	"NM_001185062,NM_001185061,NM_001185060,NM_198098"	"NP_001171991.1,NP_001171990.1,NP_001171989.1,NP_932766.1"	ENSG00000240583	"ENST00000311813,ENST00000482461,ENST00000409899,ENST00000409611,ENST00000441328"	"ENSP00000311165,ENSP00000386712,ENSP00000387178,ENSP00000405698"
AQP1	0.110839	0.634868	0.633416	0.0265838	0.451441	0.0515753	PH_hs_0028973	Homo sapiens aquaporin 1 (Colton blood group)	1	358	"NM_001185062,NM_001185061,NM_001185060,NM_198098"	"NP_001171991.1,NP_001171990.1,NP_001171989.1,NP_932766.1"	ENSG00000240583	"ENST00000311813,ENST00000482461,ENST00000409899,ENST00000409611,ENST00000441328"	"ENSP00000311165,ENSP00000386712,ENSP00000387178,ENSP00000405698"
AQP10	-0.193271	0.224265	-0.646752	0.0107949	-0.55643	0.0377299	PH_hs_0013589	Homo sapiens aquaporin 10 (AQP10)	1	89872	NM_080429	NP_536354.2	ENSG00000143595	"ENST00000355197,ENST00000324978,ENST00000484864"	"ENSP00000318355,ENSP00000420341"
AQP10	-0.193271	0.224265	-0.646752	0.0107949	-0.55643	0.0377299	PH_hs_0013589	Homo sapiens aquaporin 10 (AQP10)	1	89872	NM_080429	NP_536354.2	ENSG00000143595	"ENST00000355197,ENST00000324978,ENST00000484864"	"ENSP00000318355,ENSP00000420341"
AQP12B|AQP12A	-0.0342613	0.740707	0.421051	0.0141279	0.179294	0.0939319	PH_hs_0034953	Homo sapiens aquaporin 12B (AQP12B)|Homo sapiens aquaporin 12A (AQP12A)	4	653437|375318	NM_001102467|NM_198998	NP_001095937.1|NP_945349.1	ENSG00000185176|ENSG00000184945	"ENST00000414322,ENST00000459806,ENST00000407834,ENST00000413999,ENST00000452886,ENST00000621682|ENST00000337801,ENST00000460527,ENST00000471878,ENST00000474778,ENST00000429564"	"ENSP00000391528,ENSP00000384894,ENSP00000407457,ENSP00000395897,ENSP00000481577|ENSP00000337144,ENSP00000405899"
AQP3	-0.202259	0.336347	-0.0900624	0.708738	-0.280663	0.037957	PH_hs_0012796	Homo sapiens aquaporin 3 (Gill blood group)	1	360	NM_004925	NP_004916.1	ENSG00000165272	"ENST00000473153,ENST00000463983,ENST00000494313,ENST00000493581,ENST00000297991"	ENSP00000297991
AQP6	0.346226	0.127163	0.693528	0.0053894	0.56485	0.0117082	PH_hs_0061113	"Homo sapiens aquaporin 6, kidney specific (AQP6)"	1	363	NM_001652	NP_001643.2	ENSG00000086159	"ENST00000489786,ENST00000551733,ENST00000315520,ENST00000615425,ENST00000618286"	"ENSP00000449830,ENSP00000320247,ENSP00000477688,ENSP00000477759"
AQP6	0.346226	0.127163	0.693528	0.0053894	0.56485	0.0117082	PH_hs_0061113	"Homo sapiens aquaporin 6, kidney specific (AQP6)"	1	363	NM_001652	NP_001643.2	ENSG00000086159	"ENST00000489786,ENST00000551733,ENST00000315520,ENST00000615425,ENST00000618286"	"ENSP00000449830,ENSP00000320247,ENSP00000477688,ENSP00000477759"
AQP7	0.0649067	0.478959	0.432314	0.0127614	0.46421	0.0172567	PH_hs_0037066	Homo sapiens aquaporin 7 (AQP7)	1	364	NM_001170	NP_001161.1	ENSG00000165269	"ENST00000379507,ENST00000537089,ENST00000377425,ENST00000297988,ENST00000623097,ENST00000439678,ENST00000379506,ENST00000624075,ENST00000624890,ENST00000624005,ENST00000447660,ENST00000379503,ENST00000624420,ENST00000624095,ENST00000625109,ENST00000624432,ENST00000623743,ENST00000625032,ENST00000623519"	"ENSP00000368821,ENSP00000441619,ENSP00000396111,ENSP00000297988,ENSP00000410138,ENSP00000368820,ENSP00000485332,ENSP00000485131,ENSP00000485224,ENSP00000412868,ENSP00000485348,ENSP00000485419,ENSP00000485081,ENSP00000485246"
AQP7	0.0649067	0.478959	0.432314	0.0127614	0.46421	0.0172567	PH_hs_0037066	Homo sapiens aquaporin 7 (AQP7)	1	364	NM_001170	NP_001161.1	ENSG00000165269	"ENST00000379507,ENST00000537089,ENST00000377425,ENST00000297988,ENST00000623097,ENST00000439678,ENST00000379506,ENST00000624075,ENST00000624890,ENST00000624005,ENST00000447660,ENST00000379503,ENST00000624420,ENST00000624095,ENST00000625109,ENST00000624432,ENST00000623743,ENST00000625032,ENST00000623519"	"ENSP00000368821,ENSP00000441619,ENSP00000396111,ENSP00000297988,ENSP00000410138,ENSP00000368820,ENSP00000485332,ENSP00000485131,ENSP00000485224,ENSP00000412868,ENSP00000485348,ENSP00000485419,ENSP00000485081,ENSP00000485246"
ARFIP1	0.226967	0.341308	-0.0984607	0.842324	-0.688332	0.0136488	PH_hs_0025041	Homo sapiens ADP-ribosylation factor interacting protein 1 (ARFIP1)	1	27236	"NM_001025595,NM_001025593,NM_014447"	"NP_001020766.1,NP_001020764.1,NP_055262.1"	ENSG00000164144	"ENST00000451320,ENST00000429148,ENST00000405727,ENST00000356064,ENST00000510831,ENST00000509413,ENST00000511289,ENST00000513361,ENST00000514499,ENST00000510497,ENST00000353617,ENST00000618090"	"ENSP00000395083,ENSP00000396653,ENSP00000384189,ENSP00000348360,ENSP00000296557,ENSP00000479111"
ARGFX	0.503408	0.0652627	0.724394	0.00585703	0.337539	0.200669	PH_hs_0044776	Homo sapiens arginine-fifty homeobox (ARGFX)	1	503582	NM_001012659	NP_001012677.1	ENSG00000186103	ENST00000334384	ENSP00000335578
ARGFXP2	0.0985852	0.399175	0.886233	0.00360865	0.753366	0.00170157	PH_hs_0060675	Homo sapiens arginine-fifty homeobox pseudogene 2 (ARGFXP2)	1	503640	NR_002222	-	NA	NA	NA
ARGFXP2	0.0985852	0.399175	0.886233	0.00360865	0.753366	0.00170157	PH_hs_0060675	Homo sapiens arginine-fifty homeobox pseudogene 2 (ARGFXP2)	1	503640	NR_002222	-	NA	NA	NA
ARHGAP39	0.286978	0.292971	0.511391	0.050831	-0.450254	0.686235	PH_hs_0026852	Homo sapiens Rho GTPase activating protein 39 (ARHGAP39)	1	80728	NM_025251	NP_079527.1	ENSG00000147799	"ENST00000377307,ENST00000276826,ENST00000528810"	"ENSP00000366522,ENSP00000276826"
ARHGAP9	0.200671	0.10392	-0.124302	0.476893	-0.230043	0.0363548	PH_hs_0025577	Homo sapiens Rho GTPase activating protein 9 (ARHGAP9)	1	64333	"NM_001080157,NM_001080156,NM_032496"	"NP_001073626.1,NP_001073625.1,NP_115885.2"	ENSG00000123329	"ENST00000393791,ENST00000552953,ENST00000424809,ENST00000393797,ENST00000550399,ENST00000546200,ENST00000550288,ENST00000430041,ENST00000550440,ENST00000550130,ENST00000546704,ENST00000548139,ENST00000548148,ENST00000550454,ENST00000547200,ENST00000552604,ENST00000552420,ENST00000551574,ENST00000551452,ENST00000552066,ENST00000547216,ENST00000551000,ENST00000549602,ENST00000552249"	"ENSP00000377380,ENSP00000394307,ENSP00000377386,ENSP00000448404,ENSP00000473445,ENSP00000397950,ENSP00000448423,ENSP00000449829,ENSP00000450256,ENSP00000446932,ENSP00000448424,ENSP00000450223,ENSP00000448358"
ARHGEF19	0.225762	0.247444	0.624819	0.0513756	0.292357	0.109377	PH_hs_0028603	Homo sapiens Rho guanine nucleotide exchange factor (GEF)	1	128272	NM_153213	NP_694945.2	ENSG00000142632	"ENST00000478117,ENST00000270747,ENST00000449495,ENST00000478210,ENST00000471928,ENST00000441785"	"ENSP00000270747,ENSP00000391145,ENSP00000414370"
ARHGEF25	0.137671	0.507745	0.818366	0.0403178	0.643362	0.117377	PH_hs_0003913	Homo sapiens Rho guanine nucleotide exchange factor (GEF)	1	115557	"NM_001111270,NM_182947,NR_046223"	"NP_001104740.1,NP_891992.2,-"	ENSG00000240771	"ENST00000333972,ENST00000286494,ENST00000471370,ENST00000469072,ENST00000466399,ENST00000484357,ENST00000477314,ENST00000616622"	"ENSP00000335560,ENSP00000286494,ENSP00000484303"
ARHGEF3	-0.213201	0.270723	-0.256865	0.0861337	-0.320238	0.0519251	PH_hs_0002285	Homo sapiens Rho guanine nucleotide exchange factor (GEF)	1	50650	"NM_001128616,NM_001128615,NM_019555"	"NP_001122088.1,NP_001122087.1,NP_062455.1"	ENSG00000163947	"ENST00000296315,ENST00000338458,ENST00000413728,ENST00000465659,ENST00000496106,ENST00000497267,ENST00000495373,ENST00000468727,ENST00000473779,ENST00000481422,ENST00000498517,ENST00000477833,ENST00000477440,ENST00000468466,ENST00000486829"	"ENSP00000296315,ENSP00000341071,ENSP00000410922,ENSP00000417810,ENSP00000420420,ENSP00000418826,ENSP00000417986,ENSP00000417087,ENSP00000420402,ENSP00000418984,ENSP00000418469,ENSP00000420633"
ARHGEF6	-0.294852	0.0452329	-0.109467	0.392398	0.0117113	0.913754	PH_hs_0024220	Homo sapiens Rac/Cdc42 guanine nucleotide exchange factor (GEF)	1	9459	NM_004840	NP_004831.1	ENSG00000129675	"ENST00000370620,ENST00000370622,ENST00000250617"	"ENSP00000359654,ENSP00000359656,ENSP00000250617"
ARHGEF7	-0.00370161	0.971936	-0.202253	0.115588	-0.55948	0.0128454	PH_hs_0010346	Homo sapiens Rho guanine nucleotide exchange factor (GEF)	1	8874	"NM_001113512,NM_001113511,NM_145735"	"NP_001106984.1,NP_001106983.1,NP_663788.1"	ENSG00000102606	"ENST00000483540,ENST00000317133,ENST00000422836,ENST00000449979,ENST00000491775,ENST00000466143,ENST00000469877,ENST00000218789,ENST00000375736,ENST00000467053,ENST00000426073,ENST00000426768,ENST00000375723,ENST00000483189,ENST00000478679,ENST00000544132,ENST00000491688,ENST00000375739,ENST00000375741"	"ENSP00000325994,ENSP00000406732,ENSP00000418043,ENSP00000418067,ENSP00000418235,ENSP00000218789,ENSP00000364888,ENSP00000420592,ENSP00000397068,ENSP00000389890,ENSP00000364875,ENSP00000417596,ENSP00000445384,ENSP00000364891,ENSP00000364893"
ARHGEF9	0.177841	0.0852451	0.465909	0.00735344	0.27093	0.242171	PH_hs_0031243	Homo sapiens Cdc42 guanine nucleotide exchange factor (GEF)	1	23229	"NM_015185,NM_001173480,NM_001173479"	"NP_056000.1,NP_001166951.1,NP_001166950.1"	ENSG00000131089	"ENST00000253401,ENST00000374878,ENST00000374870,ENST00000437457,ENST00000623517,ENST00000495564,ENST00000624210,ENST00000498761,ENST00000624783,ENST00000466925,ENST00000374872,ENST00000624843,ENST00000623417,ENST00000625116,ENST00000623566,ENST00000624355,ENST00000624387,ENST00000624538,ENST00000623951"	"ENSP00000253401,ENSP00000364012,ENSP00000364004,ENSP00000399994,ENSP00000485369,ENSP00000485633,ENSP00000485144,ENSP00000485086,ENSP00000364006,ENSP00000485626,ENSP00000485083,ENSP00000485160,ENSP00000485559,ENSP00000485327,ENSP00000485282"
ARID3C	0.233821	0.0886575	0.318947	0.195996	0.420085	0.0136979	PH_hs_0034903	Homo sapiens AT rich interactive domain 3C (BRIGHT-like)	1	138715	NM_001017363	NP_001017363.1	ENSG00000205143	ENST00000378909	ENSP00000368189
ARL17A	0.17116	0.408997	0.284241	0.318538	0.52986	0.0535546	PH_hs_0027501	Homo sapiens ADP-ribosylation factor-like 17A (ARL17A)	1	51326	NM_016632	NP_057716.2	ENSG00000228696	ENST00000622877	ENSP00000479751
ARL2	-0.370784	0.137288	0.0537165	0.47313	0.208174	0.0447117	PH_hs_0044832	Homo sapiens ADP-ribosylation factor-like 2 (ARL2)	1	402	"NM_001199745,NM_001667"	"NP_001186674.1,NP_001658.2"	ENSG00000213465	"ENST00000246747,ENST00000524585,ENST00000529384,ENST00000533729,ENST00000531533,ENST00000529254"	"ENSP00000246747,ENSP00000436021,ENSP00000432971"
ARL3	-0.0499699	0.894967	-0.194902	0.870848	0.820282	0.0100497	PH_hs_0048299	Homo sapiens ADP-ribosylation factor-like 3 (ARL3)	1	403	NM_004311	NP_004302.1	ENSG00000138175	ENST00000260746	ENSP00000260746
ARL4C	-0.167637	0.596185	-0.33081	0.491846	-1.2836	0.0229399	PH_hs_0029090	Homo sapiens ADP-ribosylation factor-like 4C (ARL4C)	1	10123	NM_005737	NP_005728.2	ENSG00000188042	"ENST00000339728,ENST00000390645"	"ENSP00000339754,ENSP00000375057"
ARL8A	-0.0404909	0.736224	0.240578	0.0498395	-0.175077	0.151893	PH_hs_0028199	Homo sapiens ADP-ribosylation factor-like 8A (ARL8A)	1	127829	NM_138795	NP_620150.1	ENSG00000143862	"ENST00000272217,ENST00000491358,ENST00000486225,ENST00000614750"	"ENSP00000272217,ENSP00000485023"
ARMC9	-0.110763	0.333163	-0.0127115	0.839457	0.224422	0.0252451	PH_hs_0043073	Homo sapiens armadillo repeat containing 9 (ARMC9)	1	80210	NM_025139	NP_079415.3	ENSG00000135931	"ENST00000349938,ENST00000482392,ENST00000440107,ENST00000611582,ENST00000469789,ENST00000444285,ENST00000436339,ENST00000467698,ENST00000424740,ENST00000446447,ENST00000481520,ENST00000428662,ENST00000486787,ENST00000488821,ENST00000614261"	"ENSP00000258417,ENSP00000387391,ENSP00000484804,ENSP00000407146,ENSP00000392086,ENSP00000413932,ENSP00000411778,ENSP00000388527,ENSP00000484241"
ARMCX5	-0.156767	0.37034	-0.867144	0.179058	-1.25718	0.00192056	PH_hs_0046158	"Homo sapiens armadillo repeat containing, X-linked 5 (ARMCX5)"	1	64860	"NM_022838,NM_001168485,NM_001168482,NM_001168480,NM_001168479,NM_001168478"	"NP_073749.2,NP_001161957.1,NP_001161954.1,NP_001161952.1,NP_001161951.1,NP_001161950.1"	ENSG00000125962	"ENST00000246174,ENST00000473968,ENST00000604957,ENST00000477663,ENST00000479502,ENST00000372742"	"ENSP00000246174,ENSP00000473737,ENSP00000474720,ENSP00000474484,ENSP00000474470,ENSP00000361827"
ARPC4	0.0774168	0.487462	-0.172487	0.252448	-0.207136	0.0366986	PH_hs_0032659	"Homo sapiens actin related protein 2/3 complex, subunit 4, 20kDa (ARPC4)"	1	10093	"NM_001198780,NM_001024960,NM_001024959,NM_005718"	"NP_001185709.1,NP_001020131.1,NP_001020130.1,NP_005709.1"	ENSG00000241553	"ENST00000498623,ENST00000397261,ENST00000479956,ENST00000417500,ENST00000440787,ENST00000467289,ENST00000485273,ENST00000433034"	"ENSP00000432235,ENSP00000380431,ENSP00000414751,ENSP00000395085,ENSP00000473435,ENSP00000388169"
ARRDC4	0.270568	0.273268	0.871702	0.0211142	0.83198	0.00676941	PH_hs_0047787	Homo sapiens arrestin domain containing 4 (ARRDC4)	1	91947	NM_183376	NP_899232.2	ENSG00000140450	ENST00000268042	ENSP00000268042
ARRDC4	0.270568	0.273268	0.871702	0.0211142	0.83198	0.00676941	PH_hs_0047787	Homo sapiens arrestin domain containing 4 (ARRDC4)	1	91947	NM_183376	NP_899232.2	ENSG00000140450	ENST00000268042	ENSP00000268042
ARRDC5	0.28028	0.141542	0.540932	0.0512746	0.155781	0.405673	PH_hs_0042924	Homo sapiens arrestin domain containing 5 (ARRDC5)	1	645432	NM_001080523	NP_001073992.1	ENSG00000205784	ENST00000381781	ENSP00000371200
ARSD	0.242809	0.032341	-0.058579	0.431217	-0.115522	0.274343	PH_hs_0028201	Homo sapiens arylsulfatase D (ARSD)	1	414	NM_001669	NP_001660.2	ENSG00000006756	"ENST00000381154,ENST00000458014,ENST00000495294,ENST00000217890,ENST00000481340,ENST00000494870,ENST00000559324"	"ENSP00000370546,ENSP00000409180,ENSP00000453789"
ART1	0.00540036	0.980162	-0.73429	0.0289024	-0.615663	0.108843	PH_hs_0024354	Homo sapiens ADP-ribosyltransferase 1 (ART1)	1	417	NM_004314	NP_004305.2	ENSG00000129744	"ENST00000529556,ENST00000250693"	ENSP00000250693
AS3MT|C10orf32-ASMT	0.199964	0.232101	0.327299	0.259375	0.514477	0.0315615	PH_hs_0049364	Homo sapiens arsenite methyltransferase (AS3MT)|Homo sapiens C10orf32-ASMT readthrough (NMD candidate)	4	57412|100528007	NM_020682|NR_037644	NP_065733.2|-	ENSG00000214435	"ENST00000369880,ENST00000615257"	"ENSP00000358896,ENSP00000479361"
ASB12	-0.149661	0.15875	0.352861	0.0804579	0.479619	0.00675153	PH_hs_0003670	Homo sapiens ankyrin repeat and SOCS box containing 12 (ASB12)	1	142689	NM_130388	NP_569059.3	ENSG00000198881	ENST00000362002	ENSP00000355195
ASB16	0.437504	0.576512	0.78054	0.133095	1.52094	0.0303473	PH_hs_0026390	Homo sapiens ankyrin repeat and SOCS box containing 16 (ASB16)	1	92591	NM_080863	NP_543139.4	ENSG00000161664	"ENST00000591700,ENST00000293414,ENST00000589618"	"ENSP00000466349,ENSP00000293414,ENSP00000466033"
ASB18	-0.764172	0.0043894	-0.684957	0.0198573	-0.551529	0.117605	PH_hs_0046404	Homo sapiens ankyrin repeat and SOCS box containing 18 (ASB18)	1	401036	NM_212556	NP_997721.2	ENSG00000182177	"ENST00000409749,ENST00000447030,ENST00000430053,ENST00000487961,ENST00000469508"	"ENSP00000386532,ENSP00000411434,ENSP00000410021"
ASB18	-0.764172	0.0043894	-0.684957	0.0198573	-0.551529	0.117605	PH_hs_0046404	Homo sapiens ankyrin repeat and SOCS box containing 18 (ASB18)	1	401036	NM_212556	NP_997721.2	ENSG00000182177	"ENST00000409749,ENST00000447030,ENST00000430053,ENST00000487961,ENST00000469508"	"ENSP00000386532,ENSP00000411434,ENSP00000410021"
ASCL2	-0.315622	0.045096	-0.0779449	0.442574	-0.260987	0.150168	PH_hs_0031867	Homo sapiens achaete-scute family bHLH transcription factor 2 (ASCL2)	1	430	NM_005170	NP_005161.1	ENSG00000183734	ENST00000331289	ENSP00000332293
ASIC1	-0.184412	0.0990175	-0.303576	0.0330979	-0.00662353	0.959074	PH_hs_0014150	Homo sapiens acid sensing (proton gated)	1	41	"NM_001256830,NM_020039,NM_001095,NR_046389"	"NP_001243759.1,NP_064423.2,NP_001086.2,-"	ENSG00000110881	"ENST00000228468,ENST00000447966,ENST00000550558,ENST00000453327,ENST00000551199,ENST00000552438,ENST00000549792,ENST00000548350,ENST00000552633"	"ENSP00000228468,ENSP00000400228,ENSP00000448263,ENSP00000402896,ENSP00000450247,ENSP00000446863"
ASMT	0.0734787	0.802521	0.809125	0.0539134	0.884648	0.209254	PH_hs_0061699	Homo sapiens acetylserotonin O-methyltransferase (ASMT)	1	438	"NM_001171039,NM_001171038,NM_004043"	"NP_001164510.1,NP_001164509.1,NP_004034.2"	ENSG00000196433	"ENST00000381241,ENST00000381229,ENST00000381233,ENST00000509780,ENST00000432523"	"ENSP00000370639,ENSP00000370627,ENSP00000370631,ENSP00000392053"
ASPDH	-0.226498	0.42025	-0.588687	0.159071	-0.434164	0.0475871	PH_hs_0043966	Homo sapiens aspartate dehydrogenase domain containing (ASPDH)	1	554235	"NM_001024656,NM_001114598"	"NP_001019827.2,NP_001108070.1"	ENSG00000204653	"ENST00000376916,ENST00000597232,ENST00000389208,ENST00000601207,ENST00000601287,ENST00000597030,ENST00000593569,ENST00000598657"	"ENSP00000366114,ENSP00000373860,ENSP00000470360,ENSP00000469754"
ASTN1	0.289399	0.0584227	0.43745	0.0868313	0.531209	0.0210324	PH_hs_0044624	Homo sapiens astrotactin 1 (ASTN1)	1	460	NM_207108	NP_996991.1	ENSG00000152092	"ENST00000367657,ENST00000361833,ENST00000424564,ENST00000281881,ENST00000473640"	"ENSP00000356629,ENSP00000354536,ENSP00000395041"
ASTN2	-0.533734	0.367143	-0.862135	0.300559	-1.30598	0.00539143	PH_hs_0044570	Homo sapiens astrotactin 2 (ASTN2)	1	23245	"NM_198188,NM_198186,NM_001184734,NM_198187,NM_014010"	"NP_937831.1,NP_937829.3,NP_001171663.1,NP_937830.3,NP_054729.3"	ENSG00000148219	"ENST00000288520,ENST00000341734,ENST00000373986,ENST00000361209,ENST00000417725,ENST00000358637,ENST00000361477,ENST00000313400"	"ENSP00000288520,ENSP00000339925,ENSP00000363098,ENSP00000354504,ENSP00000412099,ENSP00000351460,ENSP00000355116,ENSP00000314038"
ATAD3C	0.104647	0.889369	0.439326	0.210158	0.931302	0.0245043	PH_hs_0043208	"Homo sapiens ATPase family, AAA domain containing 3C (ATAD3C)"	1	219293	NM_001039211	NP_001034300.2	ENSG00000215915	"ENST00000378785,ENST00000475091,ENST00000484537"	"ENSP00000368062,ENSP00000464661"
ATF3	0.123235	0.393398	-0.255449	0.123331	-0.36784	0.0520821	PH_hs_0000057	Homo sapiens activating transcription factor 3 (ATF3)	1	467	"NM_001206488,NM_001206486,NM_001206484,NM_001040619,NM_001030287,NM_001674"	"NP_001193417.2,NP_001193415.1,NP_001193413.2,NP_001035709.1,NP_001025458.1,NP_001665.1"	ENSG00000162772	"ENST00000366981,ENST00000465155,ENST00000341491,ENST00000366985,ENST00000492118,ENST00000336937,ENST00000464547,ENST00000366983,ENST00000613104,ENST00000366987,ENST00000613954"	"ENSP00000355948,ENSP00000344352,ENSP00000355952,ENSP00000336908,ENSP00000432208,ENSP00000355950,ENSP00000480606,ENSP00000355954,ENSP00000483576"
ATF6	0.0539923	0.477668	0.0575683	0.827902	0.335083	0.0153924	PH_hs_0061198	Homo sapiens activating transcription factor 6 (ATF6)	1	22926	NM_007348	NP_031374.2	ENSG00000118217	"ENST00000367942,ENST00000476437"	ENSP00000356919
ATF7	-0.198916	0.422525	-0.86299	0.00912911	-0.74147	0.110819	PH_hs_0061996	Homo sapiens activating transcription factor 7 (ATF7)	1	11016	"NM_001206683,NM_001206682"	"NP_001193612.1,NP_001193611.1"	ENSG00000170653	"ENST00000548446,ENST00000420353,ENST00000456903,ENST00000551087,ENST00000546661,ENST00000588232,ENST00000551480,ENST00000588078,ENST00000548118,ENST00000591397,ENST00000550373,ENST00000589726"	"ENSP00000449938,ENSP00000399465,ENSP00000387406,ENSP00000465850,ENSP00000449817,ENSP00000468623,ENSP00000456858,ENSP00000465192"
ATF7	0.160374	0.665432	0.248982	0.737579	0.763783	0.0215634	PH_hs_0060322	Homo sapiens activating transcription factor 7 (ATF7)	1	11016	NM_001206683	NP_001193612.1	ENSG00000170653	"ENST00000548446,ENST00000420353,ENST00000456903,ENST00000551087,ENST00000546661,ENST00000588232,ENST00000551480,ENST00000588078,ENST00000548118,ENST00000591397,ENST00000550373,ENST00000589726"	"ENSP00000449938,ENSP00000399465,ENSP00000387406,ENSP00000465850,ENSP00000449817,ENSP00000468623,ENSP00000456858,ENSP00000465192"
ATF7	0.25004	0.604826	0.458748	0.24321	1.33023	0.0207273	PH_hs_0049350	Homo sapiens activating transcription factor 7 (ATF7)	1	11016	"NM_001130060,NM_006856"	"NP_001123532.1,NP_006847.1"	ENSG00000170653	"ENST00000548446,ENST00000420353,ENST00000456903,ENST00000551087,ENST00000546661,ENST00000588232,ENST00000551480,ENST00000588078,ENST00000548118,ENST00000591397,ENST00000550373,ENST00000589726"	"ENSP00000449938,ENSP00000399465,ENSP00000387406,ENSP00000465850,ENSP00000449817,ENSP00000468623,ENSP00000456858,ENSP00000465192"
ATF7IP	-0.284849	0.0240835	-0.0598462	0.417168	0.00551262	0.970574	PH_hs_0023359	Homo sapiens activating transcription factor 7 interacting protein (ATF7IP)	1	55729	NM_018179	NP_060649.3	ENSG00000171681	"ENST00000261168,ENST00000535738,ENST00000535179,ENST00000540793,ENST00000542508,ENST00000536279,ENST00000542514,ENST00000396279,ENST00000428217,ENST00000545769,ENST00000539057,ENST00000541056,ENST00000542991,ENST00000541654,ENST00000544627,ENST00000535132,ENST00000534828,ENST00000542967,ENST00000536444,ENST00000543189,ENST00000545723,ENST00000538511,ENST00000537653,ENST00000539659"	"ENSP00000261168,ENSP00000437711,ENSP00000444589,ENSP00000439192,ENSP00000442958,ENSP00000443540,ENSP00000379575,ENSP00000414158,ENSP00000446260,ENSP00000439578,ENSP00000441483,ENSP00000443855,ENSP00000440440,ENSP00000445604,ENSP00000439279,ENSP00000444784,ENSP00000445955,ENSP00000443179,ENSP00000444620,ENSP00000440587"
ATF7IP2	0.0299726	0.924995	-0.169194	0.304103	-0.329497	0.0508976	PH_hs_0022907	Homo sapiens activating transcription factor 7 interacting protein 2 (ATF7IP2)	1	80063	"NM_024997,NM_001256160,NR_045816,NR_045815"	"NP_079273.2,NP_001243089.1,-,-"	ENSG00000166669	"ENST00000564797,ENST00000562527,ENST00000396560,ENST00000396559,ENST00000566316,ENST00000561932,ENST00000562102,ENST00000543967,ENST00000562396,ENST00000569939,ENST00000569900,ENST00000535850,ENST00000570163,ENST00000568027,ENST00000565616,ENST00000565450,ENST00000324570,ENST00000356427"	"ENSP00000461383,ENSP00000379808,ENSP00000379807,ENSP00000457731,ENSP00000446119,ENSP00000454809,ENSP00000456023,ENSP00000440791,ENSP00000455259,ENSP00000322811,ENSP00000348799"
ATG4A	0.217142	0.188243	0.0940662	0.713921	0.392175	0.0363807	PH_hs_0000926	"Homo sapiens autophagy related 4A, cysteine peptidase (ATG4A)"	1	115201	"NM_178270,NM_052936"	"NP_840054.1,NP_443168.2"	ENSG00000101844	"ENST00000372232,ENST00000345734,ENST00000457035,ENST00000372246,ENST00000343524,ENST00000394892,ENST00000474825,ENST00000489247"	"ENSP00000361306,ENSP00000298131,ENSP00000416218,ENSP00000361320,ENSP00000341833,ENSP00000378354"
ATHL1	-0.305921	0.184934	-0.00364584	0.966834	-0.321832	0.018534	PH_hs_0017140	"Homo sapiens ATH1, acid trehalase-like 1 (yeast)"	1	80162	NM_025092	NP_079368.3	ENSG00000142102	"ENST00000474221,ENST00000409548,ENST00000409655,ENST00000529087,ENST00000409479,ENST00000482937,ENST00000476372,ENST00000397660"	"ENSP00000387185,ENSP00000386297,ENSP00000387099,ENSP00000431881,ENSP00000380780"
ATL1	-0.467292	0.137062	-0.739186	0.227258	-1.32639	0.0109424	PH_hs_0043639	Homo sapiens atlastin GTPase 1 (ATL1)	1	51062	"NM_001127713,NM_181598,NM_015915"	"NP_001121185.1,NP_853629.2,NP_056999.2"	ENSG00000198513	"ENST00000556478,ENST00000441560,ENST00000555960,ENST00000553509,ENST00000358385,ENST00000554886,ENST00000557735,ENST00000553746,ENST00000555266,ENST00000556067"	"ENSP00000413675,ENSP00000452506,ENSP00000450989,ENSP00000351155,ENSP00000452074,ENSP00000451015,ENSP00000450897,ENSP00000451100"
ATP10B	-0.027838	0.966828	0.280663	0.700646	0.912352	0.0524867	PH_hs_0006040	"Homo sapiens ATPase, class V, type 10B (ATP10B)"	1	23120	NM_025153	NP_079429.2	ENSG00000118322	"ENST00000327245,ENST00000523758,ENST00000517815,ENST00000522169,ENST00000520108,ENST00000326831,ENST00000517802,ENST00000521033,ENST00000518411,ENST00000520098,ENST00000520975"	"ENSP00000313600,ENSP00000431081"
ATP10D	-0.168039	0.268878	-0.320914	0.0467065	-0.0509709	0.769913	PH_hs_0025588	"Homo sapiens ATPase, class V, type 10D (ATP10D)"	1	57205	NM_020453	NP_065186.3	ENSG00000145246	"ENST00000273859,ENST00000507889,ENST00000504445,ENST00000503288,ENST00000505476,ENST00000512393,ENST00000505277"	"ENSP00000273859,ENSP00000420909,ENSP00000421536"
ATP13A4	-0.0224806	0.962535	0.169888	0.664903	0.935791	0.0303474	PH_hs_0060859	Homo sapiens ATPase type 13A4 (ATP13A4)	1	84239	NM_032279	NP_115655.2	ENSG00000127249	"ENST00000400270,ENST00000428352,ENST00000450950,ENST00000392443,ENST00000342695,ENST00000482964,ENST00000474776,ENST00000437904,ENST00000490925,ENST00000295548,ENST00000489140"	"ENSP00000383129,ENSP00000395367,ENSP00000402023,ENSP00000376238,ENSP00000339182,ENSP00000401481,ENSP00000295548"
ATP13A4	-0.205854	0.769541	0.566408	0.112097	0.935669	0.0163669	PH_hs_0043315	Homo sapiens ATPase type 13A4 (ATP13A4)	1	84239	NM_032279	NP_115655.2	ENSG00000127249	"ENST00000400270,ENST00000428352,ENST00000450950,ENST00000392443,ENST00000342695,ENST00000482964,ENST00000474776,ENST00000437904,ENST00000490925,ENST00000295548,ENST00000489140"	"ENSP00000383129,ENSP00000395367,ENSP00000402023,ENSP00000376238,ENSP00000339182,ENSP00000401481,ENSP00000295548"
ATP1A1-AS1	-0.565146	0.352873	-0.949436	0.354485	-1.92634	0.0276764	PH_hs_0043644	Homo sapiens ATP1A1 antisense RNA 1 (ATP1A1-AS1)	1	84852	"NR_024125,NR_024126,NR_024124"	"-,-,-"	ENSG00000203865	"ENST00000608511,ENST00000493908,ENST00000369491,ENST00000369492"
ATP2C1	-0.365792	0.0210291	-0.315537	0.0329703	-0.188154	0.382678	PH_hs_0031223	"Homo sapiens ATPase, Ca++ transporting, type 2C, member 1 (ATP2C1)"	1	27032	"NM_001199179,NM_001199181,NM_001199184,NM_014382"	"NP_001186108.1,NP_001186110.1,NP_001186113.1,NP_055197.2"	ENSG00000017260	"ENST00000505330,ENST00000504381,ENST00000507488,ENST00000509150,ENST00000510168,ENST00000508532,ENST00000504948,ENST00000513801,ENST00000505072,ENST00000509662,ENST00000328560,ENST00000428331,ENST00000359644,ENST00000422190,ENST00000508297,ENST00000504612,ENST00000513636,ENST00000515854,ENST00000514654,ENST00000504571,ENST00000508660,ENST00000510774,ENST00000507194,ENST00000533801"	"ENSP00000423774,ENSP00000425320,ENSP00000421326,ENSP00000427461,ENSP00000424783,ENSP00000423330,ENSP00000422872,ENSP00000427625,ENSP00000426849,ENSP00000329664,ENSP00000395809,ENSP00000352665,ENSP00000402677,ENSP00000421261,ENSP00000425228,ENSP00000422890,ENSP00000422489,ENSP00000424930,ENSP00000427087,ENSP00000432956"
ATP2C1	-0.365792	0.0210291	-0.315537	0.0329703	-0.188154	0.382678	PH_hs_0031223	"Homo sapiens ATPase, Ca++ transporting, type 2C, member 1 (ATP2C1)"	1	27032	"NM_001199179,NM_001199181,NM_001199184,NM_014382"	"NP_001186108.1,NP_001186110.1,NP_001186113.1,NP_055197.2"	ENSG00000017260	"ENST00000505330,ENST00000504381,ENST00000507488,ENST00000509150,ENST00000510168,ENST00000508532,ENST00000504948,ENST00000513801,ENST00000505072,ENST00000509662,ENST00000328560,ENST00000428331,ENST00000359644,ENST00000422190,ENST00000508297,ENST00000504612,ENST00000513636,ENST00000515854,ENST00000514654,ENST00000504571,ENST00000508660,ENST00000510774,ENST00000507194,ENST00000533801"	"ENSP00000423774,ENSP00000425320,ENSP00000421326,ENSP00000427461,ENSP00000424783,ENSP00000423330,ENSP00000422872,ENSP00000427625,ENSP00000426849,ENSP00000329664,ENSP00000395809,ENSP00000352665,ENSP00000402677,ENSP00000421261,ENSP00000425228,ENSP00000422890,ENSP00000422489,ENSP00000424930,ENSP00000427087,ENSP00000432956"
ATP5G2	-0.347158	0.025227	-0.161793	0.157567	-0.0829505	0.398412	PH_hs_0044405	"Homo sapiens ATP synthase, H+ transporting, mitochondrial Fo complex, subunit C2 (subunit 9)"	1	517	"NM_001002031,NM_005176"	"NP_001002031.1,NP_005167.2"	ENSG00000135390	"ENST00000550241,ENST00000602871,ENST00000394349,ENST00000495596,ENST00000552242,ENST00000549164,ENST00000338662,ENST00000549748,ENST00000552120"	"ENSP00000473535,ENSP00000377878,ENSP00000448801,ENSP00000447317,ENSP00000340315,ENSP00000447643"
ATP6V0A2	0.167891	0.0801871	-0.173918	0.630767	-0.305494	0.0283869	PH_hs_0022997	"Homo sapiens ATPase, H+ transporting, lysosomal V0 subunit a2 (ATP6V0A2)"	1	23545	NM_012463	NP_036595.2	ENSG00000185344	"ENST00000330342,ENST00000540368,ENST00000504192,ENST00000545059,ENST00000536426,ENST00000534943,ENST00000544833,ENST00000543687,ENST00000613625"	"ENSP00000332247,ENSP00000443441,ENSP00000443726,ENSP00000441143,ENSP00000482236"
ATP6V1B2	-0.132337	0.138284	-0.267374	0.0231902	-0.123581	0.196756	PH_hs_0023566	"Homo sapiens ATPase, H+ transporting, lysosomal 56/58kDa, V1 subunit B2 (ATP6V1B2)"	1	526	NM_001693	NP_001684.2	ENSG00000147416	"ENST00000276390,ENST00000523482,ENST00000523478,ENST00000520830,ENST00000519667,ENST00000521442"	"ENSP00000276390,ENSP00000430154,ENSP00000428069,ENSP00000430682,ENSP00000430866"
ATP6V1G2	0.198017	0.126454	0.658249	0.0281454	0.567521	0.0135921	PH_hs_0013219	"Homo sapiens ATPase, H+ transporting, lysosomal 13kDa, V1 subunit G2 (ATP6V1G2)"	1	534	"NM_130463,NM_001204078,NM_138282"	"NP_569730.1,NP_001191007.1,NP_612139.1"	ENSG00000234668	"ENST00000491022,ENST00000468203,ENST00000421596,ENST00000454370"	"ENSP00000406575,ENSP00000413222"
ATP6V1G2	0.198017	0.126454	0.658249	0.0281454	0.567521	0.0135921	PH_hs_0013219	"Homo sapiens ATPase, H+ transporting, lysosomal 13kDa, V1 subunit G2 (ATP6V1G2)"	1	534	"NM_130463,NM_001204078,NM_138282"	"NP_569730.1,NP_001191007.1,NP_612139.1"	ENSG00000234668	"ENST00000491022,ENST00000468203,ENST00000421596,ENST00000454370"	"ENSP00000406575,ENSP00000413222"
ATP7A	0.146218	0.401926	-0.422325	0.00597518	-0.243805	0.22762	PH_hs_0040724	"Homo sapiens ATPase, Cu++ transporting, alpha polypeptide (ATP7A)"	1	538	NM_000052	NP_000043.4	ENSG00000165240	"ENST00000341514,ENST00000343533,ENST00000350425"	"ENSP00000345728,ENSP00000343026,ENSP00000343678"
ATP7A	-0.489781	0.0342299	-0.404194	0.189308	-0.294561	0.465638	PH_hs_0047338	"Homo sapiens ATPase, Cu++ transporting, alpha polypeptide (ATP7A)"	1	538	NM_000052	NP_000043.4	ENSG00000165240	"ENST00000341514,ENST00000343533,ENST00000350425"	"ENSP00000345728,ENSP00000343026,ENSP00000343678"
ATP8A1	-0.47069	0.0335287	-0.447453	0.0394229	-0.00995845	0.958684	PH_hs_0047577	"Homo sapiens ATPase, aminophospholipid transporter (APLT)"	1	10396	"NM_001105529,NM_006095"	"NP_001098999.1,NP_006086.1"	ENSG00000124406	"ENST00000514372,ENST00000381668,ENST00000264449,ENST00000511858,ENST00000506602,ENST00000515872,ENST00000506713,ENST00000504510,ENST00000504024,ENST00000510289"	"ENSP00000426495,ENSP00000371084,ENSP00000264449,ENSP00000421164,ENSP00000426935,ENSP00000427295,ENSP00000426636"
ATP8A1	-0.47069	0.0335287	-0.447453	0.0394229	-0.00995845	0.958684	PH_hs_0047577	"Homo sapiens ATPase, aminophospholipid transporter (APLT)"	1	10396	"NM_001105529,NM_006095"	"NP_001098999.1,NP_006086.1"	ENSG00000124406	"ENST00000514372,ENST00000381668,ENST00000264449,ENST00000511858,ENST00000506602,ENST00000515872,ENST00000506713,ENST00000504510,ENST00000504024,ENST00000510289"	"ENSP00000426495,ENSP00000371084,ENSP00000264449,ENSP00000421164,ENSP00000426935,ENSP00000427295,ENSP00000426636"
ATP8B2	0.0244971	0.92739	-0.322257	0.0221633	-0.309711	0.0203656	PH_hs_0047673	"Homo sapiens ATPase, aminophospholipid transporter, class I, type 8B, member 2 (ATP8B2)"	1	57198	NM_020452	NP_065185.1	ENSG00000143515	"ENST00000368487,ENST00000368490,ENST00000368489,ENST00000426445,ENST00000514107,ENST00000505882"	"ENSP00000357472,ENSP00000357475"
ATP8B2	0.0244971	0.92739	-0.322257	0.0221633	-0.309711	0.0203656	PH_hs_0047673	"Homo sapiens ATPase, aminophospholipid transporter, class I, type 8B, member 2 (ATP8B2)"	1	57198	NM_020452	NP_065185.1	ENSG00000143515	"ENST00000368487,ENST00000368490,ENST00000368489,ENST00000426445,ENST00000514107,ENST00000505882"	"ENSP00000357472,ENSP00000357475"
ATP8B2	-0.0408574	0.921887	-0.0892662	0.707757	-0.399227	0.0231572	PH_hs_0041053	"Homo sapiens ATPase, aminophospholipid transporter, class I, type 8B, member 2 (ATP8B2)"	1	57198	NM_020452	NP_065185.1	ENSG00000143515	"ENST00000368487,ENST00000368490,ENST00000368489,ENST00000426445,ENST00000514107,ENST00000505882"	"ENSP00000357472,ENSP00000357475"
ATRN	-0.133642	0.520425	-0.398377	0.0232547	-0.246065	0.0790025	PH_hs_0024228	Homo sapiens attractin (ATRN)	1	8455	NM_139321	NP_647537.1	ENSG00000088812	"ENST00000262919,ENST00000446916"	"ENSP00000262919,ENSP00000416587"
ATRX	-0.302114	0.0470048	-0.0115461	0.925152	0.1685	0.295266	PH_hs_0048183	Homo sapiens alpha thalassemia/mental retardation syndrome X-linked (ATRX)	1	546	"NM_138270,NM_000489"	"NP_612114.2,NP_000480.3"	ENSG00000085224	"ENST00000373344,ENST00000395603,ENST00000480283,ENST00000623706,ENST00000624766,ENST00000623316,ENST00000479487,ENST00000400866,ENST00000624403,ENST00000623242,ENST00000460639,ENST00000624166,ENST00000493470,ENST00000624032,ENST00000623321,ENST00000625063,ENST00000624668,ENST00000622960,ENST00000624193"	"ENSP00000362441,ENSP00000378967,ENSP00000480196,ENSP00000485274,ENSP00000383663,ENSP00000485183,ENSP00000485103,ENSP00000485408,ENSP00000485253,ENSP00000485127,ENSP00000485099,ENSP00000485100,ENSP00000485587"
AVPR2	-0.0175125	0.887741	0.418109	0.0406926	0.23172	0.323584	PH_hs_0043539	Homo sapiens arginine vasopressin receptor 2 (AVPR2)	1	554	"NM_001146151,NM_000054,NR_027419"	"NP_001139623.1,NP_000045.1,-"	ENSG00000126895	"ENST00000434679,ENST00000358927,ENST00000430697,ENST00000370049,ENST00000337474"	"ENSP00000393397,ENSP00000351805,ENSP00000393513,ENSP00000359066,ENSP00000338072"
AWAT1	0.156974	0.491973	0.574622	0.0391595	0.0542862	0.933428	PH_hs_0033176	Homo sapiens acyl-CoA wax alcohol acyltransferase 1 (AWAT1)	1	158833	NM_001013579	NP_001013597.1	ENSG00000204195	"ENST00000480702,ENST00000374521"	ENSP00000363645
AXDND1	0.0662328	0.928692	-1.48179	0.0101972	-1.37899	0.115421	PH_hs_0041033	Homo sapiens axonemal dynein light chain domain containing 1 (AXDND1)	1	126859	"NM_144696,NR_073544"	"NP_653297.3,-"	ENSG00000162779	"ENST00000509175,ENST00000367618,ENST00000507383,ENST00000508229,ENST00000508285,ENST00000511889,ENST00000510593,ENST00000511157,ENST00000461179,ENST00000434088,ENST00000484883,ENST00000484455,ENST00000489080,ENST00000457238,ENST00000617277"	"ENSP00000425019,ENSP00000356590,ENSP00000422992,ENSP00000425198,ENSP00000424373,ENSP00000391716,ENSP00000416712,ENSP00000482167"
AXDND1	0.36905	0.411225	0.214145	0.478106	0.444236	0.0159869	PH_hs_0047369	Homo sapiens axonemal dynein light chain domain containing 1 (AXDND1)	1	126859	"NM_144696,NR_073544"	"NP_653297.3,-"	ENSG00000162779	"ENST00000509175,ENST00000367618,ENST00000507383,ENST00000508229,ENST00000508285,ENST00000511889,ENST00000510593,ENST00000511157,ENST00000461179,ENST00000434088,ENST00000484883,ENST00000484455,ENST00000489080,ENST00000457238,ENST00000617277"	"ENSP00000425019,ENSP00000356590,ENSP00000422992,ENSP00000425198,ENSP00000424373,ENSP00000391716,ENSP00000416712,ENSP00000482167"
B3GALNT1	-0.209106	0.502016	-0.351443	0.574996	-0.927429	0.0471533	PH_hs_0061769	"Homo sapiens beta-1,3-N-acetylgalactosaminyltransferase 1 (globoside blood group)"	1	8706	"NM_033168,NM_033167,NM_001038628,NM_033169,NM_003781"	"NP_149358.1,NP_149357.1,NP_001033717.1,NP_149359.1,NP_003772.1"	ENSG00000169255	"ENST00000320474,ENST00000392779,ENST00000392781,ENST00000473285,ENST00000417187,ENST00000488170,ENST00000468268,ENST00000492353,ENST00000473142,ENST00000498216,ENST00000484127,ENST00000460353,ENST00000494173,ENST00000496295,ENST00000476999,ENST00000478383,ENST00000494818,ENST00000497487"	"ENSP00000323479,ENSP00000376530,ENSP00000376532,ENSP00000418226,ENSP00000407027,ENSP00000420163,ENSP00000419476,ENSP00000418567,ENSP00000420604,ENSP00000417643,ENSP00000420059,ENSP00000417053,ENSP00000419127"
B3GALNT2	-0.350387	0.316324	-0.45789	0.0259258	-0.395986	0.0869561	PH_hs_0025895	"Homo sapiens beta-1,3-N-acetylgalactosaminyltransferase 2 (B3GALNT2)"	1	148789	NM_152490	NP_689703.1	ENSG00000162885	"ENST00000366600,ENST00000477694,ENST00000462374,ENST00000612859,ENST00000313984,ENST00000494378,ENST00000461994"	"ENSP00000355559,ENSP00000481548,ENSP00000315678"
B3GALT1	-0.116726	0.319262	-0.556868	0.00398573	-0.586299	0.00216631	PH_hs_0026885	"Homo sapiens UDP-Gal:betaGlcNAc beta 1,3-galactosyltransferase, polypeptide 1 (B3GALT1)"	1	8708	NM_020981	NP_066191.1	ENSG00000172318	ENST00000392690	ENSP00000376456
B3GALT1	-0.116726	0.319262	-0.556868	0.00398573	-0.586299	0.00216631	PH_hs_0026885	"Homo sapiens UDP-Gal:betaGlcNAc beta 1,3-galactosyltransferase, polypeptide 1 (B3GALT1)"	1	8708	NM_020981	NP_066191.1	ENSG00000172318	ENST00000392690	ENSP00000376456
B3GAT1	0.126314	0.354504	0.592483	0.0346732	0.475641	0.0158514	PH_hs_0018568	"Homo sapiens beta-1,3-glucuronyltransferase 1 (B3GAT1)"	1	27087	"NM_054025,NM_018644"	"NP_473366.1,NP_061114.2"	ENSG00000109956	"ENST00000531778,ENST00000312527,ENST00000524765,ENST00000531510,ENST00000392580"	"ENSP00000307875,ENSP00000433847,ENSP00000376359"
B3GAT1	0.126314	0.354504	0.592483	0.0346732	0.475641	0.0158514	PH_hs_0018568	"Homo sapiens beta-1,3-glucuronyltransferase 1 (B3GAT1)"	1	27087	"NM_054025,NM_018644"	"NP_473366.1,NP_061114.2"	ENSG00000109956	"ENST00000531778,ENST00000312527,ENST00000524765,ENST00000531510,ENST00000392580"	"ENSP00000307875,ENSP00000433847,ENSP00000376359"
B4GALNT2	-0.564435	0.0469926	-0.442745	0.0833626	-0.497111	0.0718216	PH_hs_0018151	"Homo sapiens beta-1,4-N-acetyl-galactosaminyl transferase 2 (B4GALNT2)"	1	124872	"NM_153446,NM_001159387,NM_001159388"	"NP_703147.2,NP_001152859.1,NP_001152860.1"	ENSG00000167080	"ENST00000504681,ENST00000393354,ENST00000300404"	"ENSP00000425510,ENSP00000377022,ENSP00000300404"
B4GALNT4	-0.348899	0.12715	-0.625885	0.0218569	-0.242427	0.540878	PH_hs_0042203	"Homo sapiens beta-1,4-N-acetyl-galactosaminyl transferase 4 (B4GALNT4)"	1	338707	NM_178537	NP_848632.2	ENSG00000182272	"ENST00000530717,ENST00000329962,ENST00000524443,ENST00000526584,ENST00000534778"	"ENSP00000328277,ENSP00000434463,ENSP00000432372"
BACH1	-0.0148679	0.962744	-0.32462	0.0534864	-0.199	0.141779	PH_hs_0045622	"Homo sapiens BTB and CNC homology 1, basic leucine zipper transcription factor 1 (BACH1)"	1	571	NR_027655	-	ENSG00000156273	ENST00000462262
BACH2	-0.917763	0.027921	-1.27373	0.224028	-0.988295	0.422625	PH_hs_0060869	"Homo sapiens BTB and CNC homology 1, basic leucine zipper transcription factor 2 (BACH2)"	1	60468	"NM_021813,NM_001170794"	"NP_068585.1,NP_001164265.1"	ENSG00000112182	"ENST00000257749,ENST00000343122,ENST00000481150,ENST00000406998,ENST00000453877,ENST00000470301,ENST00000493201,ENST00000472023,ENST00000494747,ENST00000537989"	"ENSP00000257749,ENSP00000345642,ENSP00000384145,ENSP00000397668,ENSP00000437473"
BAGE	0.255611	0.685614	0.599314	0.0539886	1.39396	0.0184353	PH_hs_0062492	Homo sapiens B melanoma antigen (BAGE)	1	574	NM_001187	NP_001178.1	NA	NA	NA
BAGE	0.255611	0.685614	0.599314	0.0539886	1.39396	0.0184353	PH_hs_0062492	Homo sapiens B melanoma antigen (BAGE)	1	574	NM_001187	NP_001178.1	NA	NA	NA
BAGE2|BAGE4|BAGE3|BAGE5	-0.410144	0.0114987	-0.36086	0.0142731	-0.137845	0.539329	PH_hs_0062274	"Homo sapiens B melanoma antigen family, member 2 (BAGE2)|Homo sapiens B melanoma antigen family, member 4 (BAGE4)|Homo sapiens B melanoma antigen family, member 3 (BAGE3)|Homo sapiens B melanoma antigen family, member 5 (BAGE5)"	4	85319|85317|85318|85316	NM_182482|NM_181704|NM_182481|NM_182484	NP_872288.2|NP_859055.1|NP_872287.1|NP_872290.1	ENSG00000279973|ENSG00000279973	ENST00000624155|ENST00000624155	ENSP00000485185|ENSP00000485185
BAGE2|BAGE4|BAGE3|BAGE5	-0.410144	0.0114987	-0.36086	0.0142731	-0.137845	0.539329	PH_hs_0062274	"Homo sapiens B melanoma antigen family, member 2 (BAGE2)|Homo sapiens B melanoma antigen family, member 4 (BAGE4)|Homo sapiens B melanoma antigen family, member 3 (BAGE3)|Homo sapiens B melanoma antigen family, member 5 (BAGE5)"	4	85319|85317|85318|85316	NM_182482|NM_181704|NM_182481|NM_182484	NP_872288.2|NP_859055.1|NP_872287.1|NP_872290.1	ENSG00000279973|ENSG00000279973	ENST00000624155|ENST00000624155	ENSP00000485185|ENSP00000485185
BAK1	0.143449	0.397434	0.386027	0.017712	-0.0573525	0.906442	PH_hs_0060710	Homo sapiens BCL2-antagonist/killer 1 (BAK1)	1	578	NM_001188	NP_001179.1	ENSG00000030110	"ENST00000374467,ENST00000442998,ENST00000360661"	"ENSP00000363591,ENSP00000391258,ENSP00000353878"
BANF2	0.151746	0.615832	-0.0165088	0.971833	-1.03099	0.0488944	PH_hs_0006322	Homo sapiens barrier to autointegration factor 2 (BANF2)	1	140836	NM_178477	NP_848572.3	ENSG00000125888	"ENST00000545418,ENST00000427254,ENST00000377805,ENST00000246090,ENST00000467330"	"ENSP00000439128,ENSP00000398738,ENSP00000367036,ENSP00000246090"
BANF2	0.146484	0.338968	0.407678	0.168271	0.435924	0.0442991	PH_hs_0031550	Homo sapiens barrier to autointegration factor 2 (BANF2)	1	140836	"NM_178477,NM_001159495,NM_001014977"	"NP_848572.3,NP_001152967.1,NP_001014977.2"	ENSG00000125888	"ENST00000545418,ENST00000427254,ENST00000377805,ENST00000246090,ENST00000467330"	"ENSP00000439128,ENSP00000398738,ENSP00000367036,ENSP00000246090"
BARD1	0.297289	0.0414856	0.138652	0.491253	0.0493564	0.766447	PH_hs_0003556	Homo sapiens BRCA1 associated RING domain 1 (BARD1)	1	580	NM_000465	NP_000456.2	ENSG00000138376	"ENST00000260947,ENST00000471590,ENST00000432456,ENST00000455743,ENST00000421162,ENST00000465841,ENST00000471787,ENST00000479904,ENST00000619009,ENST00000617164,ENST00000613374,ENST00000613706,ENST00000613192,ENST00000620057"	"ENSP00000260947,ENSP00000405020,ENSP00000412186,ENSP00000392245,ENSP00000482293,ENSP00000480470,ENSP00000484464,ENSP00000484976,ENSP00000483275,ENSP00000481988"
BATF2	-0.146415	0.669148	-0.440297	0.0256062	-0.501096	0.0114492	PH_hs_0047316	"Homo sapiens basic leucine zipper transcription factor, ATF-like 2 (BATF2)"	1	116071	NM_138456	NP_612465.3	ENSG00000168062	"ENST00000301887,ENST00000435842,ENST00000527454,ENST00000527716,ENST00000534177"	"ENSP00000301887,ENSP00000398911,ENSP00000434915,ENSP00000435640"
BATF2	-0.146415	0.669148	-0.440297	0.0256062	-0.501096	0.0114492	PH_hs_0047316	"Homo sapiens basic leucine zipper transcription factor, ATF-like 2 (BATF2)"	1	116071	NM_138456	NP_612465.3	ENSG00000168062	"ENST00000301887,ENST00000435842,ENST00000527454,ENST00000527716,ENST00000534177"	"ENSP00000301887,ENSP00000398911,ENSP00000434915,ENSP00000435640"
BBX	-0.310261	0.0379989	-0.311997	0.035425	-0.0762493	0.682894	PH_hs_0048565	Homo sapiens bobby sox homolog (Drosophila)	1	56987	"NM_001142568,NM_020235"	"NP_001136040.1,NP_064620.2"	ENSG00000114439	"ENST00000415149,ENST00000402543,ENST00000325805,ENST00000474137,ENST00000485939,ENST00000427402,ENST00000416476,ENST00000454540,ENST00000431630,ENST00000449335,ENST00000456817,ENST00000458458,ENST00000456419,ENST00000402163,ENST00000406780,ENST00000413213,ENST00000449271,ENST00000425868,ENST00000449213,ENST00000457496,ENST00000429270,ENST00000472032,ENST00000497629,ENST00000473542,ENST0000044325…	"ENSP00000408358,ENSP00000385317,ENSP00000319974,ENSP00000413320,ENSP00000403860,ENSP00000396373,ENSP00000392230,ENSP00000408297,ENSP00000400543,ENSP00000404654,ENSP00000413274,ENSP00000385518,ENSP00000385530,ENSP00000403806,ENSP00000406554,ENSP00000412390,ENSP00000407662,ENSP00000404943,ENSP00000414673,ENSP00000402372,ENSP00000401524"
BBX	-0.310261	0.0379989	-0.311997	0.035425	-0.0762493	0.682894	PH_hs_0048565	Homo sapiens bobby sox homolog (Drosophila)	1	56987	"NM_001142568,NM_020235"	"NP_001136040.1,NP_064620.2"	ENSG00000114439	"ENST00000415149,ENST00000402543,ENST00000325805,ENST00000474137,ENST00000485939,ENST00000427402,ENST00000416476,ENST00000454540,ENST00000431630,ENST00000449335,ENST00000456817,ENST00000458458,ENST00000456419,ENST00000402163,ENST00000406780,ENST00000413213,ENST00000449271,ENST00000425868,ENST00000449213,ENST00000457496,ENST00000429270,ENST00000472032,ENST00000497629,ENST00000473542,ENST0000044325…	"ENSP00000408358,ENSP00000385317,ENSP00000319974,ENSP00000413320,ENSP00000403860,ENSP00000396373,ENSP00000392230,ENSP00000408297,ENSP00000400543,ENSP00000404654,ENSP00000413274,ENSP00000385518,ENSP00000385530,ENSP00000403806,ENSP00000406554,ENSP00000412390,ENSP00000407662,ENSP00000404943,ENSP00000414673,ENSP00000402372,ENSP00000401524"
BCAM	0.217301	0.377931	0.453811	0.0406692	0.0213568	0.896161	PH_hs_0009334	Homo sapiens basal cell adhesion molecule (Lutheran blood group)	1	4059	"NM_001013257,NM_005581"	"NP_001013275.1,NP_005572.2"	ENSG00000187244	"ENST00000589651,ENST00000270233,ENST00000588303,ENST00000591520,ENST00000588603,ENST00000590108,ENST00000590196,ENST00000589558,ENST00000588714,ENST00000590624,ENST00000611077"	"ENSP00000476710,ENSP00000270233,ENSP00000467100,ENSP00000468189,ENSP00000481153"
BCAT1	-0.467981	0.0183313	-0.264533	0.0295739	-0.109829	0.639501	PH_hs_0047859	"Homo sapiens branched chain amino-acid transaminase 1, cytosolic (BCAT1)"	1	586	"NM_001178094,NM_001178093,NM_001178092,NM_001178091,NM_005504"	"NP_001171565.1,NP_001171564.1,NP_001171563.1,NP_001171562.1,NP_005495.2"	ENSG00000060982	"ENST00000261192,ENST00000538118,ENST00000342945,ENST00000539282,ENST00000543099,ENST00000539780,ENST00000544418,ENST00000612790,ENST00000546285,ENST00000355164"	"ENSP00000261192,ENSP00000440817,ENSP00000339805,ENSP00000443459,ENSP00000440827,ENSP00000481749,ENSP00000438593"
BCAT1	-0.467981	0.0183313	-0.264533	0.0295739	-0.109829	0.639501	PH_hs_0047859	"Homo sapiens branched chain amino-acid transaminase 1, cytosolic (BCAT1)"	1	586	"NM_001178094,NM_001178093,NM_001178092,NM_001178091,NM_005504"	"NP_001171565.1,NP_001171564.1,NP_001171563.1,NP_001171562.1,NP_005495.2"	ENSG00000060982	"ENST00000261192,ENST00000538118,ENST00000342945,ENST00000539282,ENST00000543099,ENST00000539780,ENST00000544418,ENST00000612790,ENST00000546285,ENST00000355164"	"ENSP00000261192,ENSP00000440817,ENSP00000339805,ENSP00000443459,ENSP00000440827,ENSP00000481749,ENSP00000438593"
BCL10	0.409259	0.22945	0.658108	0.0344104	0.222149	0.521073	PH_hs_0061324	Homo sapiens B-cell CLL/lymphoma 10 (BCL10)	1	8915	NM_003921	NP_003912.1	ENSG00000142867	"ENST00000370580,ENST00000620248"	"ENSP00000359612,ENSP00000480561"
BCL2L1	-0.192839	0.542216	-0.254558	0.678289	0.328115	0.0387277	PH_hs_0015713	Homo sapiens BCL2-like 1 (BCL2L1)	1	598	"NM_138578,NM_001191"	"NP_612815.1,NP_001182.1"	ENSG00000171552	"ENST00000376062,ENST00000376055,ENST00000307677,ENST00000450273,ENST00000422920,ENST00000456404,ENST00000420488,ENST00000439267,ENST00000434194"	"ENSP00000365230,ENSP00000365223,ENSP00000302564,ENSP00000406203,ENSP00000411252,ENSP00000395545,ENSP00000390760,ENSP00000389688,ENSP00000401173"
BCL2L11	-0.12198	0.304588	-0.395242	0.053339	-0.121848	0.351484	PH_hs_0061414	Homo sapiens BCL2-like 11 (apoptosis facilitator)	1	10018	"NM_001204112,NM_001204111,NM_001204110,NM_001204109,NM_001204108,NM_001204107,NM_001204106,NM_138627,NM_138626,NM_138625,NM_138624,NM_138623,NM_138622,NM_207003,NM_138621,NM_006538"	"NP_001191041.1,NP_001191040.1,NP_001191039.1,NP_001191038.1,NP_001191037.1,NP_001191036.1,NP_001191035.1,NP_619533.1,NP_619532.1,NP_619531.1,NP_619530.1,NP_619529.1,NP_619528.1,NP_996886.1,NP_619527.1,NP_006529.1"	ENSG00000153094	"ENST00000432179,ENST00000308659,ENST00000393256,ENST00000393252,ENST00000433098,ENST00000405953,ENST00000415458,ENST00000436733,ENST00000437029,ENST00000452231,ENST00000361493,ENST00000431217,ENST00000439718,ENST00000438054,ENST00000337565,ENST00000622509,ENST00000619294,ENST00000610735,ENST00000622612,ENST00000357757,ENST00000615946,ENST00000621302,ENST00000620862"	"ENSP00000411870,ENSP00000309226,ENSP00000376943,ENSP00000376941,ENSP00000401662,ENSP00000384641,ENSP00000393781,ENSP00000403727,ENSP00000412892,ENSP00000391292,ENSP00000354879,ENSP00000394640,ENSP00000411137,ENSP00000389225,ENSP00000338374,ENSP00000482175,ENSP00000479714,ENSP00000481030,ENSP00000484360,ENSP00000350398,ENSP00000481423,ENSP00000481652,ENSP00000478133"
BCL2L11	-0.295194	0.665836	0.101899	0.738055	0.782655	0.00354341	PH_hs_0060300	Homo sapiens BCL2-like 11 (apoptosis facilitator)	1	10018	NM_001204113	NP_001191042.1	ENSG00000153094	"ENST00000432179,ENST00000308659,ENST00000393256,ENST00000393252,ENST00000433098,ENST00000405953,ENST00000415458,ENST00000436733,ENST00000437029,ENST00000452231,ENST00000361493,ENST00000431217,ENST00000439718,ENST00000438054,ENST00000337565,ENST00000622509,ENST00000619294,ENST00000610735,ENST00000622612,ENST00000357757,ENST00000615946,ENST00000621302,ENST00000620862"	"ENSP00000411870,ENSP00000309226,ENSP00000376943,ENSP00000376941,ENSP00000401662,ENSP00000384641,ENSP00000393781,ENSP00000403727,ENSP00000412892,ENSP00000391292,ENSP00000354879,ENSP00000394640,ENSP00000411137,ENSP00000389225,ENSP00000338374,ENSP00000482175,ENSP00000479714,ENSP00000481030,ENSP00000484360,ENSP00000350398,ENSP00000481423,ENSP00000481652,ENSP00000478133"
BCL2L11	-0.0369171	0.792557	0.413286	0.0323748	0.34142	0.0489265	PH_hs_0022197	Homo sapiens BCL2-like 11 (apoptosis facilitator)	1	10018	"NM_001204109,NM_001204108,NM_138626,NM_138624,NM_138622,NM_138621"	"NP_001191038.1,NP_001191037.1,NP_619532.1,NP_619530.1,NP_619528.1,NP_619527.1"	ENSG00000153094	"ENST00000432179,ENST00000308659,ENST00000393256,ENST00000393252,ENST00000433098,ENST00000405953,ENST00000415458,ENST00000436733,ENST00000437029,ENST00000452231,ENST00000361493,ENST00000431217,ENST00000439718,ENST00000438054,ENST00000337565,ENST00000622509,ENST00000619294,ENST00000610735,ENST00000622612,ENST00000357757,ENST00000615946,ENST00000621302,ENST00000620862"	"ENSP00000411870,ENSP00000309226,ENSP00000376943,ENSP00000376941,ENSP00000401662,ENSP00000384641,ENSP00000393781,ENSP00000403727,ENSP00000412892,ENSP00000391292,ENSP00000354879,ENSP00000394640,ENSP00000411137,ENSP00000389225,ENSP00000338374,ENSP00000482175,ENSP00000479714,ENSP00000481030,ENSP00000484360,ENSP00000350398,ENSP00000481423,ENSP00000481652,ENSP00000478133"
BCL2L11	-0.0369171	0.792557	0.413286	0.0323748	0.34142	0.0489265	PH_hs_0022197	Homo sapiens BCL2-like 11 (apoptosis facilitator)	1	10018	"NM_001204109,NM_001204108,NM_138626,NM_138624,NM_138622,NM_138621"	"NP_001191038.1,NP_001191037.1,NP_619532.1,NP_619530.1,NP_619528.1,NP_619527.1"	ENSG00000153094	"ENST00000432179,ENST00000308659,ENST00000393256,ENST00000393252,ENST00000433098,ENST00000405953,ENST00000415458,ENST00000436733,ENST00000437029,ENST00000452231,ENST00000361493,ENST00000431217,ENST00000439718,ENST00000438054,ENST00000337565,ENST00000622509,ENST00000619294,ENST00000610735,ENST00000622612,ENST00000357757,ENST00000615946,ENST00000621302,ENST00000620862"	"ENSP00000411870,ENSP00000309226,ENSP00000376943,ENSP00000376941,ENSP00000401662,ENSP00000384641,ENSP00000393781,ENSP00000403727,ENSP00000412892,ENSP00000391292,ENSP00000354879,ENSP00000394640,ENSP00000411137,ENSP00000389225,ENSP00000338374,ENSP00000482175,ENSP00000479714,ENSP00000481030,ENSP00000484360,ENSP00000350398,ENSP00000481423,ENSP00000481652,ENSP00000478133"
BCL2L15	-0.0501847	0.586672	0.511822	0.0178635	0.333161	0.562724	PH_hs_0039653	Homo sapiens BCL2-like 15 (BCL2L15)	1	440603	NM_001010922	NP_001010922.1	ENSG00000188761	"ENST00000369580,ENST00000393316,ENST00000488450,ENST00000393320,ENST00000471267,ENST00000486485"	"ENSP00000376992,ENSP00000376995,ENSP00000417458"
BCL7A	-0.0806665	0.768655	-0.115078	0.401318	-0.472443	0.016497	PH_hs_0031716	Homo sapiens B-cell CLL/lymphoma 7A (BCL7A)	1	605	"NM_001024808,NM_020993"	"NP_001019979.1,NP_066273.1"	ENSG00000110987	"ENST00000538010,ENST00000261822,ENST00000432926"	"ENSP00000445868,ENSP00000261822"
BCL9L	-0.0481799	0.946121	-0.975667	0.0455294	-0.881187	0.12225	PH_hs_0024992	Homo sapiens B-cell CLL/lymphoma 9-like (BCL9L)	1	283149	NM_182557	NP_872363.1	ENSG00000186174	"ENST00000334801,ENST00000526143,ENST00000530293,ENST00000527266,ENST00000532899"	"ENSP00000335320,ENSP00000482938,ENSP00000432804"
BEAN1	0.214022	0.159202	0.811863	0.00644176	0.123356	0.783228	PH_hs_0005610	"Homo sapiens brain expressed, associated with NEDD4, 1 (BEAN1)"	1	146227	"NM_001136106,NM_001178020"	"NP_001129578.1,NP_001171491.1"	ENSG00000166546	"ENST00000536005,ENST00000562849,ENST00000299694,ENST00000561796,ENST00000569272,ENST00000618932,ENST00000564819,ENST00000563075,ENST00000562146,ENST00000566654,ENST00000622872"	"ENSP00000442793,ENSP00000456822,ENSP00000299694,ENSP00000455212,ENSP00000477843,ENSP00000456430,ENSP00000462088,ENSP00000483700"
BET1	-0.317722	0.471572	-0.438381	0.34248	-0.621717	0.0521254	PH_hs_0044745	Homo sapiens Bet1 golgi vesicular membrane trafficking protein (BET1)	1	10282	NM_005868	NP_005859.1	ENSG00000105829	"ENST00000357520,ENST00000424151,ENST00000471446,ENST00000222547,ENST00000433727,ENST00000457139,ENST00000425626"	"ENSP00000350125,ENSP00000222547,ENSP00000391228,ENSP00000401260,ENSP00000413063"
BET1L	-0.355793	0.0964522	-0.34179	0.0310198	-0.139211	0.229466	PH_hs_0015469	Homo sapiens Bet1 golgi vesicular membrane trafficking protein-like (BET1L)	1	51272	"NM_001098787,NM_016526"	"NP_001092257.1,NP_057610.2"	ENSG00000177951	"ENST00000410108,ENST00000325147,ENST00000382762,ENST00000529614,ENST00000332865,ENST00000486280,ENST00000479463"	"ENSP00000386558,ENSP00000339093,ENSP00000372210,ENSP00000436643,ENSP00000333470,ENSP00000436205"
BEX2|BEX1	0.45646	0.124717	0.356067	0.0233077	0.620886	0.0241794	PH_hs_0049585	"Homo sapiens brain expressed X-linked 2 (BEX2)|Homo sapiens brain expressed, X-linked 1 (BEX1)"	4	84707|55859	"NM_001168401,NM_032621,NM_001168400,NM_001168399|NM_018476"	"NP_001161873.1,NP_116010.1,NP_001161872.1,NP_001161871.1|NP_060946.3"	ENSG00000133134|ENSG00000133169	"ENST00000372677,ENST00000372674,ENST00000449185,ENST00000536889|ENST00000372728"	"ENSP00000361762,ENSP00000361759,ENSP00000394915,ENSP00000442521|ENSP00000361813"
BEX2|BEX1	0.45646	0.124717	0.356067	0.0233077	0.620886	0.0241794	PH_hs_0049585	"Homo sapiens brain expressed X-linked 2 (BEX2)|Homo sapiens brain expressed, X-linked 1 (BEX1)"	4	84707|55859	"NM_001168401,NM_032621,NM_001168400,NM_001168399|NM_018476"	"NP_001161873.1,NP_116010.1,NP_001161872.1,NP_001161871.1|NP_060946.3"	ENSG00000133134|ENSG00000133169	"ENST00000372677,ENST00000372674,ENST00000449185,ENST00000536889|ENST00000372728"	"ENSP00000361762,ENSP00000361759,ENSP00000394915,ENSP00000442521|ENSP00000361813"
BHLHE22	0.0421541	0.860186	0.710025	0.047954	1.10775	0.131023	PH_hs_0030007	"Homo sapiens basic helix-loop-helix family, member e22 (BHLHE22)"	1	27319	NM_152414	NP_689627.1	ENSG00000180828	ENST00000321870	ENSP00000318799
BIRC3	-0.55341	0.0322829	-0.2158	0.586511	0.0412178	0.858261	PH_hs_0007351	Homo sapiens baculoviral IAP repeat containing 3 (BIRC3)	1	330	"NM_182962,NM_001165"	"NP_892007.1,NP_001156.1"	ENSG00000023445	"ENST00000526421,ENST00000263464,ENST00000528940,ENST00000532808,ENST00000527309,ENST00000527336,ENST00000615299"	"ENSP00000263464,ENSP00000432907,ENSP00000431718,ENSP00000481903"
BLOC1S4	0.252819	0.0367695	-0.0224617	0.927487	0.00985222	0.929111	PH_hs_0000783	"Homo sapiens biogenesis of lysosomal organelles complex-1, subunit 4, cappuccino (BLOC1S4)"	1	55330	NM_018366	NP_060836.1	ENSG00000186222	ENST00000320776	ENSP00000318128
BMP3	-0.369491	0.0188345	-0.420331	0.00696424	-0.420331	0.00547102	PH_hs_0006762	Homo sapiens bone morphogenetic protein 3 (BMP3)	1	651	NM_001201	NP_001192.2	ENSG00000152785	ENST00000282701	ENSP00000282701
BMP3	-0.369491	0.0188345	-0.420331	0.00696424	-0.420331	0.00547102	PH_hs_0006762	Homo sapiens bone morphogenetic protein 3 (BMP3)	1	651	NM_001201	NP_001192.2	ENSG00000152785	ENST00000282701	ENSP00000282701
BMP3	-0.369491	0.0188345	-0.420331	0.00696424	-0.420331	0.00547102	PH_hs_0006762	Homo sapiens bone morphogenetic protein 3 (BMP3)	1	651	NM_001201	NP_001192.2	ENSG00000152785	ENST00000282701	ENSP00000282701
BMS1	-0.338762	0.0400886	-0.0223278	0.849482	-0.0618414	0.569619	PH_hs_0001073	Homo sapiens BMS1 ribosome biogenesis factor (BMS1)	1	9790	NM_014753	NP_055568.3	ENSG00000165733	ENST00000374518	ENSP00000363642
BORA	-0.263285	0.0416874	-0.201228	0.0600091	-0.0288564	0.84189	PH_hs_0023813	"Homo sapiens bora, aurora kinase A activator (BORA)"	1	79866	NM_024808	NP_079084.3	ENSG00000136122	"ENST00000390667,ENST00000618209,ENST00000377814,ENST00000377815,ENST00000471712,ENST00000464754,ENST00000613797"	"ENSP00000375082,ENSP00000479349,ENSP00000367045,ENSP00000367046,ENSP00000479266"
BPIFA2	-0.0125933	0.921796	0.561558	0.0407277	0.443589	0.0108382	PH_hs_0008853	"Homo sapiens BPI fold containing family A, member 2 (BPIFA2)"	1	140683	NM_080574	NP_542141.1	ENSG00000131050	"ENST00000253362,ENST00000354932"	"ENSP00000253362,ENSP00000347012"
BPIFA2	-0.0125933	0.921796	0.561558	0.0407277	0.443589	0.0108382	PH_hs_0008853	"Homo sapiens BPI fold containing family A, member 2 (BPIFA2)"	1	140683	NM_080574	NP_542141.1	ENSG00000131050	"ENST00000253362,ENST00000354932"	"ENSP00000253362,ENSP00000347012"
BPIFB2	-0.0415306	0.653223	0.326317	0.0262292	0.236299	0.0845627	PH_hs_0013510	"Homo sapiens BPI fold containing family B, member 2 (BPIFB2)"	1	80341	NM_025227	NP_079503.1	ENSG00000078898	ENST00000170150	ENSP00000170150
BRF1	-0.048615	0.630393	0.247664	0.0471247	0.0809527	0.403649	PH_hs_0025169	"Homo sapiens BRF1, RNA polymerase III transcription initiation factor 90 kDa subunit (BRF1)"	1	2972	"NM_001242789,NM_001242788,NM_001242787,NM_001242786,NM_001519,NM_145685"	"NP_001229718.1,NP_001229717.1,NP_001229716.1,NP_001229715.1,NP_001510.2,NP_663718.1"	ENSG00000185024	"ENST00000392557,ENST00000379937,ENST00000546474,ENST00000547374,ENST00000547530,ENST00000446501,ENST00000551787,ENST00000546997,ENST00000327359,ENST00000440513,ENST00000549044,ENST00000547562,ENST00000547052,ENST00000549655,ENST00000552127,ENST00000546417,ENST00000550208,ENST00000550375,ENST00000550692,ENST00000548421,ENST00000379932,ENST00000619151"	"ENSP00000376340,ENSP00000369269,ENSP00000448323,ENSP00000448387,ENSP00000389859,ENSP00000446901,ENSP00000329029,ENSP00000388877,ENSP00000450151,ENSP00000448723,ENSP00000449788,ENSP00000450258,ENSP00000449173,ENSP00000447521,ENSP00000448823,ENSP00000446707,ENSP00000369264,ENSP00000480452"
BRK1	-0.218184	0.0442198	-0.171081	0.306482	-0.179297	0.061054	PH_hs_0019746	"Homo sapiens BRICK1, SCAR/WAVE actin-nucleating complex subunit (BRK1)"	1	55845	NM_018462	NP_060932.2	ENSG00000254999	ENST00000530758	ENSP00000432472
BROX	-0.119898	0.389241	-0.285414	0.0418653	-0.378951	0.0151749	PH_hs_0044253	Homo sapiens BRO1 domain and CAAX motif containing (BROX)	1	148362	NM_144695	NP_653296.2	ENSG00000162819	"ENST00000340934,ENST00000496267,ENST00000426638,ENST00000473962,ENST00000469236,ENST00000489191,ENST00000539697,ENST00000537020,ENST00000612948"	"ENSP00000343742,ENSP00000398862,ENSP00000441080,ENSP00000440041,ENSP00000478496"
BROX	-0.119898	0.389241	-0.285414	0.0418653	-0.378951	0.0151749	PH_hs_0044253	Homo sapiens BRO1 domain and CAAX motif containing (BROX)	1	148362	NM_144695	NP_653296.2	ENSG00000162819	"ENST00000340934,ENST00000496267,ENST00000426638,ENST00000473962,ENST00000469236,ENST00000489191,ENST00000539697,ENST00000537020,ENST00000612948"	"ENSP00000343742,ENSP00000398862,ENSP00000441080,ENSP00000440041,ENSP00000478496"
BSND	0.110847	0.496577	-0.437357	0.0340495	-0.241576	0.38809	PH_hs_0042090	Homo sapiens barttin CLCNK-type chloride channel accessory beta subunit (BSND)	1	7809	NM_057176	NP_476517.1	ENSG00000162399	ENST00000371265	ENSP00000360312
BTBD17	0.0766493	0.658918	0.666289	0.015776	0.665388	0.0485776	PH_hs_0033516	Homo sapiens BTB (POZ)	1	388419	NM_001080466	NP_001073935.1	ENSG00000204347	ENST00000375366	ENSP00000364515
BTBD17	0.0766493	0.658918	0.666289	0.015776	0.665388	0.0485776	PH_hs_0033516	Homo sapiens BTB (POZ)	1	388419	NM_001080466	NP_001073935.1	ENSG00000204347	ENST00000375366	ENSP00000364515
BTBD3	-0.648993	0.444128	0.0148683	0.971909	-1.16246	0.0398556	PH_hs_0000823	Homo sapiens BTB (POZ)	1	22903	"NM_014962,NM_181443"	"NP_055777.1,NP_852108.2"	ENSG00000132640	"ENST00000254977,ENST00000399006,ENST00000405977,ENST00000449299,ENST00000450368,ENST00000422390,ENST00000455911,ENST00000430557,ENST00000488503,ENST00000471120,ENST00000473416,ENST00000473180,ENST00000618918,ENST00000378226,ENST00000618296"	"ENSP00000254977,ENSP00000381971,ENSP00000384545,ENSP00000410502,ENSP00000404268,ENSP00000397809,ENSP00000408817,ENSP00000404582,ENSP00000483520,ENSP00000367471,ENSP00000477589"
BTF3L4	0.253201	0.163176	0.51338	0.0377029	0.67992	0.0220354	PH_hs_0060934	Homo sapiens basic transcription factor 3-like 4 (BTF3L4)	1	91408	"NM_001136497,NM_001243767,NM_152265"	"NP_001129969.1,NP_001230696.1,NP_689478.1"	ENSG00000134717	"ENST00000313334,ENST00000477828,ENST00000489308,ENST00000526132,ENST00000472944,ENST00000524414,ENST00000484036,ENST00000533836"	"ENSP00000360664,ENSP00000434611,ENSP00000434824,ENSP00000436712,ENSP00000433418"
BTF3L4	0.253201	0.163176	0.51338	0.0377029	0.67992	0.0220354	PH_hs_0060934	Homo sapiens basic transcription factor 3-like 4 (BTF3L4)	1	91408	"NM_001136497,NM_001243767,NM_152265"	"NP_001129969.1,NP_001230696.1,NP_689478.1"	ENSG00000134717	"ENST00000313334,ENST00000477828,ENST00000489308,ENST00000526132,ENST00000472944,ENST00000524414,ENST00000484036,ENST00000533836"	"ENSP00000360664,ENSP00000434611,ENSP00000434824,ENSP00000436712,ENSP00000433418"
BTG1	0.00313763	0.991709	-0.186459	0.111608	-0.680496	0.0275006	PH_hs_0036552	"Homo sapiens B-cell translocation gene 1, anti-proliferative (BTG1)"	1	694	NM_001731	NP_001722.1	ENSG00000133639	"ENST00000256015,ENST00000552315"	"ENSP00000256015,ENSP00000447551"
BTG2	0.27472	0.0260398	0.350044	0.243455	0.474198	0.00420252	PH_hs_0004330	"Homo sapiens BTG family, member 2 (BTG2)"	1	7832	NM_006763	NP_006754.1	ENSG00000159388	"ENST00000475157,ENST00000290551"	"ENSP00000433553,ENSP00000290551"
BTG2	0.27472	0.0260398	0.350044	0.243455	0.474198	0.00420252	PH_hs_0004330	"Homo sapiens BTG family, member 2 (BTG2)"	1	7832	NM_006763	NP_006754.1	ENSG00000159388	"ENST00000475157,ENST00000290551"	"ENSP00000433553,ENSP00000290551"
C10orf126	0.301228	0.0891528	0.575369	0.0128415	0.735345	0.0208855	PH_hs_0018207	PREDICTED: Homo sapiens chromosome 10 open reading frame 126 (C10orf126)	1	283080	"XM_011519451,NM_001278522"	"XP_011517753.1,NP_001265451.1"	NA	NA	NA
C10orf126	0.301228	0.0891528	0.575369	0.0128415	0.735345	0.0208855	PH_hs_0018207	PREDICTED: Homo sapiens chromosome 10 open reading frame 126 (C10orf126)	1	283080	"XM_011519451,NM_001278522"	"XP_011517753.1,NP_001265451.1"	NA	NA	NA
C10orf53	0.0724395	0.471585	-0.411141	0.00675134	-0.243	0.211196	PH_hs_0044476	Homo sapiens chromosome 10 open reading frame 53 (C10orf53)	1	282966	NM_182554	NP_872360.2	ENSG00000178645	"ENST00000374113,ENST00000374111,ENST00000374112,ENST00000535836"	"ENSP00000363227,ENSP00000363225,ENSP00000363226,ENSP00000437726"
C10orf55	0.0723586	0.762938	-0.586981	0.0315438	-0.235849	0.415547	PH_hs_0033965	Homo sapiens chromosome 10 open reading frame 55 (C10orf55)	1	414236	NM_001001791	NP_001001791.2	ENSG00000222047	"ENST00000409178,ENST00000412307"	ENSP00000409225
C11orf1	-0.312148	0.0237917	-0.137023	0.140137	0.0148025	0.939071	PH_hs_0044123	Homo sapiens chromosome 11 open reading frame 1 (C11orf1)	1	64776	NM_022761	NP_073598.1	ENSG00000137720	"ENST00000528125,ENST00000260276,ENST00000530214,ENST00000530799,ENST00000529270"	"ENSP00000433224,ENSP00000260276,ENSP00000435864,ENSP00000432128,ENSP00000431180"
C11orf42	0.246286	0.685809	0.307782	0.0638528	0.688516	0.004424	PH_hs_0014261	Homo sapiens chromosome 11 open reading frame 42 (C11orf42)	1	160298	NM_173525	NP_775796.2	ENSG00000180878	ENST00000316375	ENSP00000321021
C11orf49	-0.192955	0.61918	-0.167279	0.258918	-0.35713	0.0539474	PH_hs_0015080	Homo sapiens chromosome 11 open reading frame 49 (C11orf49)	1	79096	"NM_001003677,NM_001003676,NM_024113,NM_001003678"	"NP_001003677.1,NP_001003676.1,NP_077018.1,NP_001003678.1"	ENSG00000149179	"ENST00000533124,ENST00000528488,ENST00000525279,ENST00000522712,ENST00000278460,ENST00000531648,ENST00000527234,ENST00000378618,ENST00000532840,ENST00000395460,ENST00000532633,ENST00000378615,ENST00000526424,ENST00000525895,ENST00000527667,ENST00000527784,ENST00000527268,ENST00000534249,ENST00000526827,ENST00000529980,ENST00000525953,ENST00000534581,ENST00000624693"	"ENSP00000436595,ENSP00000432186,ENSP00000278460,ENSP00000367881,ENSP00000378844,ENSP00000437259,ENSP00000367878,ENSP00000434380,ENSP00000432535,ENSP00000436097,ENSP00000436571,ENSP00000433494,ENSP00000433707"
C11orf58	-0.211947	0.0460343	2.14e-05	0.999899	-0.0762096	0.657064	PH_hs_0031340	Homo sapiens chromosome 11 open reading frame 58 (C11orf58)	1	10944	NM_014267	NP_055082.1	ENSG00000110696	"ENST00000527893,ENST00000228136,ENST00000524439,ENST00000528634,ENST00000525684,ENST00000525256,ENST00000525106,ENST00000524461,ENST00000531658,ENST00000524508"	"ENSP00000228136,ENSP00000432207,ENSP00000431237,ENSP00000432534"
C11orf63	0.0316386	0.895258	-0.236893	0.203902	0.414315	0.0264583	PH_hs_0044109	Homo sapiens chromosome 11 open reading frame 63 (C11orf63)	1	79864	NM_199124	NP_954575.1	ENSG00000109944	"ENST00000307257,ENST00000531316,ENST00000534362,ENST00000227349"	"ENSP00000307695,ENSP00000431669,ENSP00000227349"
C12orf42	0.817271	0.0124851	0.0620359	0.88743	-0.0112203	0.963182	PH_hs_0007189	Homo sapiens chromosome 12 open reading frame 42 (C12orf42)	1	374470	"NM_198521,NM_001099336"	"NP_940923.2,NP_001092806.1"	ENSG00000179088	"ENST00000547347,ENST00000547470,ENST00000549927,ENST00000551303,ENST00000550650,ENST00000546526,ENST00000552977,ENST00000548883,ENST00000548048,ENST00000551134,ENST00000548789,ENST00000552578,ENST00000550497,ENST00000552372,ENST00000548196,ENST00000378113"	"ENSP00000446908,ENSP00000447908,ENSP00000449362,ENSP00000449447,ENSP00000447795,ENSP00000367353"
C12orf49	-0.107832	0.552691	-0.423961	0.1283	-0.591855	0.0325414	PH_hs_0006632	Homo sapiens chromosome 12 open reading frame 49 (C12orf49)	1	79794	NM_024738	NP_079014.1	ENSG00000111412	"ENST00000261318,ENST00000547630,ENST00000548356,ENST00000547606"	"ENSP00000261318,ENSP00000446478,ENSP00000449151,ENSP00000447722"
C12orf50	-0.0461257	0.945257	0.490313	0.554824	0.999841	0.000561006	PH_hs_0063447	Homo sapiens chromosome 12 open reading frame 50 (C12orf50)	1	160419	NM_152589	NP_689802.1	ENSG00000165805	"ENST00000298699,ENST00000550553,ENST00000551944,ENST00000551163,ENST00000546547"	"ENSP00000298699,ENSP00000448344,ENSP00000448855"
C12orf71	-0.228499	0.481843	-1.35528	0.00917511	-1.35528	0.00917581	PH_hs_0060622	Homo sapiens chromosome 12 open reading frame 71 (C12orf71)	1	728858	NM_001080406	NP_001073875.1	ENSG00000214700	ENST00000429849	ENSP00000413728
C12orf71	-0.228499	0.481843	-1.35528	0.00917511	-1.35528	0.00917581	PH_hs_0060622	Homo sapiens chromosome 12 open reading frame 71 (C12orf71)	1	728858	NM_001080406	NP_001073875.1	ENSG00000214700	ENST00000429849	ENSP00000413728
C12orf73	-0.24826	0.21911	-0.6653	0.0479789	-0.315303	0.194289	PH_hs_0003117	Homo sapiens chromosome 12 open reading frame 73 (C12orf73)	1	728568	NM_001135570	NP_001129042.1	ENSG00000204954	"ENST00000543740,ENST00000378090,ENST00000547975,ENST00000549478,ENST00000553183,ENST00000549960,ENST00000547945,ENST00000552460,ENST00000552940,ENST00000546819,ENST00000546540"	"ENSP00000367330,ENSP00000447452,ENSP00000448771,ENSP00000446981,ENSP00000449951,ENSP00000449839,ENSP00000450253,ENSP00000448863,ENSP00000447403,ENSP00000447827"
C14orf119	-0.304439	0.483151	-0.375615	0.345284	-0.692165	0.0439093	PH_hs_0023632	Homo sapiens chromosome 14 open reading frame 119 (C14orf119)	1	55017	NM_017924	NP_060394.1	ENSG00000179933	"ENST00000319074,ENST00000554203"	"ENSP00000322238,ENSP00000450861"
C14orf178	0.0886868	0.447472	0.882415	0.00380107	0.655149	0.0536829	PH_hs_0018266	Homo sapiens chromosome 14 open reading frame 178 (C14orf178)	1	283579	"NM_174943,NM_001173978"	"NP_777603.1,NP_001167449.1"	ENSG00000197734	"ENST00000355883,ENST00000557011,ENST00000556047,ENST00000439131"	"ENSP00000348145,ENSP00000451236,ENSP00000451531,ENSP00000407405"
C14orf178	0.0886868	0.447472	0.882415	0.00380107	0.655149	0.0536829	PH_hs_0018266	Homo sapiens chromosome 14 open reading frame 178 (C14orf178)	1	283579	"NM_174943,NM_001173978"	"NP_777603.1,NP_001167449.1"	ENSG00000197734	"ENST00000355883,ENST00000557011,ENST00000556047,ENST00000439131"	"ENSP00000348145,ENSP00000451236,ENSP00000451531,ENSP00000407405"
C14orf180	-0.249019	0.271009	-0.469081	0.0322965	-0.435119	0.0473645	PH_hs_0009252	Homo sapiens chromosome 14 open reading frame 180 (C14orf180)	1	400258	NM_001008404	NP_001008404.1	ENSG00000184601	"ENST00000557649,ENST00000331952,ENST00000410013"	"ENSP00000452502,ENSP00000333041,ENSP00000386487"
C14orf180	-0.249019	0.271009	-0.469081	0.0322965	-0.435119	0.0473645	PH_hs_0009252	Homo sapiens chromosome 14 open reading frame 180 (C14orf180)	1	400258	NM_001008404	NP_001008404.1	ENSG00000184601	"ENST00000557649,ENST00000331952,ENST00000410013"	"ENSP00000452502,ENSP00000333041,ENSP00000386487"
C14orf37	0.502015	0.569929	0.689933	0.0370211	1.51308	0.00334599	PH_hs_0048400	Homo sapiens chromosome 14 open reading frame 37 (C14orf37)	1	145407	NM_001001872	NP_001001872.2	ENSG00000139971	"ENST00000556788,ENST00000267485,ENST00000557175,ENST00000334342,ENST00000555101,ENST00000554218"	"ENSP00000267485,ENSP00000477692"
C14orf37	0.502015	0.569929	0.689933	0.0370211	1.51308	0.00334599	PH_hs_0048400	Homo sapiens chromosome 14 open reading frame 37 (C14orf37)	1	145407	NM_001001872	NP_001001872.2	ENSG00000139971	"ENST00000556788,ENST00000267485,ENST00000557175,ENST00000334342,ENST00000555101,ENST00000554218"	"ENSP00000267485,ENSP00000477692"
C16orf46	0.237963	0.0800031	0.831007	0.00568673	0.782326	0.00466164	PH_hs_0037874	Homo sapiens chromosome 16 open reading frame 46 (C16orf46)	1	123775	NM_001100873	NP_001094343.1	ENSG00000166455	"ENST00000378611,ENST00000299578,ENST00000444657,ENST00000565253"	"ENSP00000367874,ENSP00000299578,ENSP00000455877"
C16orf46	0.237963	0.0800031	0.831007	0.00568673	0.782326	0.00466164	PH_hs_0037874	Homo sapiens chromosome 16 open reading frame 46 (C16orf46)	1	123775	NM_001100873	NP_001094343.1	ENSG00000166455	"ENST00000378611,ENST00000299578,ENST00000444657,ENST00000565253"	"ENSP00000367874,ENSP00000299578,ENSP00000455877"
C17orf107	0.174544	0.0794671	0.289104	0.406894	0.303622	0.0158645	PH_hs_0042923	Homo sapiens chromosome 17 open reading frame 107 (C17orf107)	1	100130311	NM_001145536	NP_001139008.1	ENSG00000205710	"ENST00000521575,ENST00000381365"	"ENSP00000429241,ENSP00000370770"
C17orf51	-0.248283	0.237145	-1.65268	0.000187111	-0.654959	0.507974	PH_hs_0048125	Homo sapiens chromosome 17 open reading frame 51 (C17orf51)	1	339263	NM_001113434	NP_001106905.1	ENSG00000212719	"ENST00000540508,ENST00000538604,ENST00000391411,ENST00000535846,ENST00000412778"	"ENSP00000384286,ENSP00000445158"
C17orf80	-0.0279787	0.840797	0.0095836	0.903469	-0.344271	0.0248793	PH_hs_0061631	Homo sapiens chromosome 17 open reading frame 80 (C17orf80)	1	55028	NM_001100622	NP_001094092.1	ENSG00000141219	"ENST00000255557,ENST00000577615,ENST00000585109,ENST00000268942,ENST00000426147,ENST00000582391,ENST00000535032,ENST00000582793,ENST00000359042"	"ENSP00000255557,ENSP00000464132,ENSP00000462818,ENSP00000268942,ENSP00000396970,ENSP00000463019,ENSP00000440551,ENSP00000463718,ENSP00000351937"
C17orf96	-0.0348576	0.949409	-1.05438	0.0264979	-0.140541	0.873668	PH_hs_0042667	Homo sapiens chromosome 17 open reading frame 96 (C17orf96)	1	100170841	NM_001130677	NP_001124149.1	ENSG00000273604	ENST00000621654	ENSP00000484710
C18orf12	0.160103	0.448054	-0.013351	0.931405	-0.342172	0.0183123	PH_hs_0016427	PREDICTED: Homo sapiens chromosome 18 open reading frame 12 (C18orf12)	1	84322	"XR_109479,XR_172245"	"-,-"	ENSG00000280197	ENST00000623329
C19orf68	0.26574	0.309417	-0.735021	0.0278053	-0.597071	0.0909047	PH_hs_0046550	PREDICTED: Homo sapiens chromosome 19 open reading frame 68 (C19orf68)	1	374920	"XM_011526937,XM_011526936,XM_011526935,XM_006723205,XM_006723204,XM_005259449,NM_199341"	"XP_011525239.1,XP_011525238.1,XP_011525237.1,XP_006723268.1,XP_006723267.1,XP_005259506.1,NP_955373.3"	ENSG00000185453	"ENST00000328759,ENST00000593921,ENST00000614654"	"ENSP00000331363,ENSP00000480314"
C1GALT1	0.0296822	0.892144	-0.671856	0.0307873	-0.588512	0.0970256	PH_hs_0028016	"Homo sapiens core 1 synthase, glycoprotein-N-acetylgalactosamine 3-beta-galactosyltransferase 1 (C1GALT1)"	1	56913	NM_020156	NP_064541.1	ENSG00000106392	"ENST00000429911,ENST00000419721,ENST00000467716,ENST00000476068,ENST00000223122,ENST00000402468,ENST00000436587"	"ENSP00000407666,ENSP00000415400,ENSP00000223122,ENSP00000384550,ENSP00000389176"
C1orf110	-0.0998846	0.363087	-0.38285	0.00834461	-0.0990459	0.714356	PH_hs_0019430	Homo sapiens chromosome 1 open reading frame 110 (C1orf110)	1	339512	NM_178550	NP_848645.3	ENSG00000185860	"ENST00000524691,ENST00000367912,ENST00000367910,ENST00000524710,ENST00000367911"	"ENSP00000356888,ENSP00000356886,ENSP00000356887"
C1orf127	-0.399145	0.0491808	-0.465539	0.0378815	-0.407354	0.188664	PH_hs_0046269	Homo sapiens chromosome 1 open reading frame 127 (C1orf127)	1	148345	NM_001170754	NP_001164225.1	ENSG00000175262	"ENST00000476357,ENST00000418570,ENST00000468348,ENST00000520253,ENST00000377004"	"ENSP00000387816,ENSP00000467607,ENSP00000429704,ENSP00000366203"
C1orf127	-0.399145	0.0491808	-0.465539	0.0378815	-0.407354	0.188664	PH_hs_0046269	Homo sapiens chromosome 1 open reading frame 127 (C1orf127)	1	148345	NM_001170754	NP_001164225.1	ENSG00000175262	"ENST00000476357,ENST00000418570,ENST00000468348,ENST00000520253,ENST00000377004"	"ENSP00000387816,ENSP00000467607,ENSP00000429704,ENSP00000366203"
C1orf162	0.31736	0.0392692	-0.016573	0.914985	-0.257709	0.0742757	PH_hs_0014933	Homo sapiens chromosome 1 open reading frame 162 (C1orf162)	1	128346	NM_174896	NP_777556.1	ENSG00000143110	"ENST00000343534,ENST00000369718,ENST00000464591"	"ENSP00000344218,ENSP00000358732"
C1orf177	-0.363683	0.246937	-0.373392	0.328161	-0.668081	0.0466698	PH_hs_0018281	Homo sapiens chromosome 1 open reading frame 177 (C1orf177)	1	163747	"NM_152607,NM_001110533"	"NP_689820.2,NP_001104003.1"	ENSG00000162398	"ENST00000358193,ENST00000371273"	"ENSP00000350924,ENSP00000360320"
C1orf186	-0.501784	0.0809508	-0.500394	0.0482722	-0.398435	0.033998	PH_hs_0036656	Homo sapiens chromosome 1 open reading frame 186 (C1orf186)	1	440712	NM_001007544	NP_001007545.1	ENSG00000263961	"ENST00000604113,ENST00000585172,ENST00000582619,ENST00000331555,ENST00000582596,ENST00000584198,ENST00000577298,ENST00000603378,ENST00000603488,ENST00000604112,ENST00000582070"	"ENSP00000356093,ENSP00000474759,ENSP00000474994,ENSP00000463990"
C1orf186	-0.501784	0.0809508	-0.500394	0.0482722	-0.398435	0.033998	PH_hs_0036656	Homo sapiens chromosome 1 open reading frame 186 (C1orf186)	1	440712	NM_001007544	NP_001007545.1	ENSG00000263961	"ENST00000604113,ENST00000585172,ENST00000582619,ENST00000331555,ENST00000582596,ENST00000584198,ENST00000577298,ENST00000603378,ENST00000603488,ENST00000604112,ENST00000582070"	"ENSP00000356093,ENSP00000474759,ENSP00000474994,ENSP00000463990"
C1orf21	0.0761278	0.425896	0.164953	0.151532	-0.380164	0.0446898	PH_hs_0048266	Homo sapiens chromosome 1 open reading frame 21 (C1orf21)	1	81563	NM_030806	NP_110433.1	ENSG00000116667	"ENST00000235307,ENST00000489143,ENST00000367514,ENST00000477517"	ENSP00000235307
C1orf210	-0.270404	0.776672	-2.3488	0.0145218	-0.252374	0.805892	PH_hs_0009651	Homo sapiens chromosome 1 open reading frame 210 (C1orf210)	1	149466	"NM_001164829,NM_182517"	"NP_001158301.1,NP_872323.1"	ENSG00000253313	"ENST00000523677,ENST00000423420"	"ENSP00000430918,ENSP00000429399"
C1orf216	0.230908	0.252999	0.198406	0.438336	0.366647	0.039656	PH_hs_0043064	Homo sapiens chromosome 1 open reading frame 216 (C1orf216)	1	127703	NM_152374	NP_689587.1	ENSG00000142686	"ENST00000270815,ENST00000503824,ENST00000453178"	ENSP00000425166
C1orf54	0.316299	0.0841585	0.641543	0.0158367	0.873575	0.00778982	PH_hs_0005074	Homo sapiens chromosome 1 open reading frame 54 (C1orf54)	1	79630	NM_024579	NP_078855.2	ENSG00000118292	"ENST00000369102,ENST00000369099,ENST00000369098"	"ENSP00000358098,ENSP00000358095,ENSP00000358094"
C1orf54	0.316299	0.0841585	0.641543	0.0158367	0.873575	0.00778982	PH_hs_0005074	Homo sapiens chromosome 1 open reading frame 54 (C1orf54)	1	79630	NM_024579	NP_078855.2	ENSG00000118292	"ENST00000369102,ENST00000369099,ENST00000369098"	"ENSP00000358098,ENSP00000358095,ENSP00000358094"
C1QC	0.218788	0.333779	0.768603	0.0251791	0.890844	0.0315335	PH_hs_0027193	"Homo sapiens complement component 1, q subcomponent, C chain (C1QC)"	1	714	"NM_172369,NM_001114101"	"NP_758957.2,NP_001107573.1"	ENSG00000159189	"ENST00000374640,ENST00000374639,ENST00000374637"	"ENSP00000363771,ENSP00000363770,ENSP00000363768"
C1QC	0.218788	0.333779	0.768603	0.0251791	0.890844	0.0315335	PH_hs_0027193	"Homo sapiens complement component 1, q subcomponent, C chain (C1QC)"	1	714	"NM_172369,NM_001114101"	"NP_758957.2,NP_001107573.1"	ENSG00000159189	"ENST00000374640,ENST00000374639,ENST00000374637"	"ENSP00000363771,ENSP00000363770,ENSP00000363768"
C1QL1	0.0317281	0.735907	0.500684	0.00880573	0.347782	0.0734657	PH_hs_0008058	"Homo sapiens complement component 1, q subcomponent-like 1 (C1QL1)"	1	10882	NM_006688	NP_006679.1	ENSG00000131094	ENST00000253407	ENSP00000253407
C1QL2	-0.157896	0.620342	0.00054275	0.997101	-1.6686	0.026027	PH_hs_0020127	"Homo sapiens complement component 1, q subcomponent-like 2 (C1QL2)"	1	165257	NM_182528	NP_872334.2	ENSG00000144119	ENST00000272520	ENSP00000272520
C1QL4	-0.128509	0.74791	0.402214	0.613808	0.845173	0.017877	PH_hs_0018494	"Homo sapiens complement component 1, q subcomponent-like 4 (C1QL4)"	1	338761	NM_001008223	NP_001008224.1	ENSG00000186897	ENST00000334221	ENSP00000335285
C1QTNF1	-0.103656	0.701603	-0.348116	0.530465	-0.445426	0.0165838	PH_hs_0011807	Homo sapiens C1q and tumor necrosis factor related protein 1 (C1QTNF1)	1	114897	"NM_198594,NM_153372,NM_198593,NM_030968,NR_049769"	"NP_940996.1,NP_699203.1,NP_940995.1,NP_112230.1,-"	ENSG00000173918	"ENST00000578229,ENST00000580454,ENST00000579760,ENST00000582295,ENST00000339142,ENST00000311661,ENST00000392445,ENST00000581774,ENST00000583904,ENST00000580474,ENST00000582625,ENST00000354124"	"ENSP00000463337,ENSP00000462990,ENSP00000463922,ENSP00000340864,ENSP00000311265,ENSP00000376240,ENSP00000462481,ENSP00000463008,ENSP00000463108,ENSP00000343230"
C1QTNF5|MFRP	-0.62077	0.550743	-1.60647	0.113902	-2.06167	0.0281541	PH_hs_0009512	Homo sapiens C1q and tumor necrosis factor related protein 5 (C1QTNF5)|Homo sapiens membrane frizzled-related protein (MFRP)	4	114902|83552	NM_015645|NM_031433	NP_056460.1|NP_113621.1	ENSG00000223953|ENSG00000259159	"ENST00000525657,ENST00000528368|ENST00000530681,ENST00000619721"	"ENSP00000431140|ENSP00000456533,ENSP00000481824"
C1QTNF5|MFRP	0.303706	0.358682	0.643597	0.0457583	0.59448	0.524631	PH_hs_0026859	Homo sapiens C1q and tumor necrosis factor related protein 5 (C1QTNF5)|Homo sapiens membrane frizzled-related protein (MFRP)	4	114902|83552	NM_015645|NM_031433	NP_056460.1|NP_113621.1	ENSG00000223953|ENSG00000259159	"ENST00000525657,ENST00000528368|ENST00000530681,ENST00000619721"	"ENSP00000431140|ENSP00000456533,ENSP00000481824"
C1QTNF6	-0.285894	0.0233402	-0.0821984	0.382016	-0.245655	0.0309523	PH_hs_0001919	Homo sapiens C1q and tumor necrosis factor related protein 6 (C1QTNF6)	1	114904	"NM_031910,NM_182486"	"NP_114116.3,NP_872292.1"	ENSG00000133466	"ENST00000397110,ENST00000337843,ENST00000470655,ENST00000493023,ENST00000434784,ENST00000467564,ENST00000497071"	"ENSP00000380299,ENSP00000338812,ENSP00000399243"
C1QTNF6	-0.285894	0.0233402	-0.0821984	0.382016	-0.245655	0.0309523	PH_hs_0001919	Homo sapiens C1q and tumor necrosis factor related protein 6 (C1QTNF6)	1	114904	"NM_031910,NM_182486"	"NP_114116.3,NP_872292.1"	ENSG00000133466	"ENST00000397110,ENST00000337843,ENST00000470655,ENST00000493023,ENST00000434784,ENST00000467564,ENST00000497071"	"ENSP00000380299,ENSP00000338812,ENSP00000399243"
C1QTNF7	0.197674	0.255047	0.589217	0.0231148	0.021619	0.97337	PH_hs_0009245	Homo sapiens C1q and tumor necrosis factor related protein 7 (C1QTNF7)	1	114905	"NM_031911,NM_001135171,NM_001135170"	"NP_114117.1,NP_001128643.1,NP_001128642.1"	ENSG00000163145	"ENST00000397700,ENST00000295297,ENST00000512144,ENST00000510958,ENST00000382383,ENST00000444304,ENST00000429690"	"ENSP00000380812,ENSP00000295297,ENSP00000371820,ENSP00000388914,ENSP00000410722"
C1QTNF8	0.367851	0.422665	0.120938	0.594612	0.503142	0.0236118	PH_hs_0034595	Homo sapiens C1q and tumor necrosis factor related protein 8 (C1QTNF8)	1	390664	NM_207419	NP_997302.2	ENSG00000184471	"ENST00000328449,ENST00000621771"	"ENSP00000330426,ENSP00000479192"
C1QTNF9|C1QTNF9B	0.356697	0.182195	0.670121	0.144477	0.641576	0.0342405	PH_hs_0062284	Homo sapiens C1q and tumor necrosis factor related protein 9 (C1QTNF9)|Homo sapiens C1q and tumor necrosis factor related protein 9B (C1QTNF9B)	4	338872|387911	NM_178540|NM_001007537	NP_848635.2|NP_001007538.1	ENSG00000240654|ENSG00000205863	"ENST00000382071,ENST00000332018|ENST00000382145,ENST00000556521,ENST00000382140,ENST00000382137"	"ENSP00000371503,ENSP00000333737|ENSP00000371580,ENSP00000371575,ENSP00000371572"
C1RL-AS1	-0.0596761	0.652779	0.475655	0.0441306	-0.241782	0.734674	PH_hs_0046967	Homo sapiens C1RL antisense RNA 1 (C1RL-AS1)	1	283314	NR_026947	-	ENSG00000205885	"ENST00000435921,ENST00000541775,ENST00000536679,ENST00000382215,ENST00000535078"
C20orf197	0.197749	0.183469	-0.318319	0.0353369	-0.0538787	0.78825	PH_hs_0023870	Homo sapiens chromosome 20 open reading frame 197 (C20orf197)	1	284756	NM_173644	NP_775915.1	NA	NA	NA
C21orf62	-0.258899	0.156006	-0.0466286	0.870354	-0.446317	0.0480917	PH_hs_0019805	Homo sapiens chromosome 21 open reading frame 62 (C21orf62)	1	56245	"NM_001162496,NM_001162495,NM_019596"	"NP_001155968.2,NP_001155967.2,NP_062542.5"	ENSG00000262938	"ENST00000576372,ENST00000576061,ENST00000573131,ENST00000571812,ENST00000610926"	"ENSP00000461359,ENSP00000460629,ENSP00000461325,ENSP00000461558,ENSP00000479857"
C2CD2L	-0.0558257	0.784421	-0.0174733	0.865567	-0.427508	0.0178358	PH_hs_0002379	Homo sapiens C2CD2-like (C2CD2L)	1	9854	NM_014807	NP_055622.3	ENSG00000172375	"ENST00000534024,ENST00000528271,ENST00000529600,ENST00000529885,ENST00000527854,ENST00000336702,ENST00000529874,ENST00000525598,ENST00000528586,ENST00000533458"	"ENSP00000338885,ENSP00000433600"
C2CD3	0.206277	0.0803422	-0.781745	0.00261315	-0.536334	0.118668	PH_hs_0035868	Homo sapiens C2 calcium-dependent domain containing 3 (C2CD3)	1	26005	NM_015531	NP_056346.3	ENSG00000168014	"ENST00000442398,ENST00000542452,ENST00000538625,ENST00000540452,ENST00000313663,ENST00000414160,ENST00000538361,ENST00000542484,ENST00000535645,ENST00000540057,ENST00000537285,ENST00000366334,ENST00000415191,ENST00000539061,ENST00000436679,ENST00000541922,ENST00000535954,ENST00000544293,ENST00000542930,ENST00000334126"	"ENSP00000404577,ENSP00000323339,ENSP00000388750,ENSP00000441742,ENSP00000445933,ENSP00000439343,ENSP00000334379"
C2CD4C	-0.691371	0.0293988	-0.909695	0.00115212	-0.731175	0.0234553	PH_hs_0012517	Homo sapiens C2 calcium-dependent domain containing 4C (C2CD4C)	1	126567	NM_001136263	NP_001129735.1	ENSG00000183186	ENST00000332235	ENSP00000328677
C2CD4C	-0.691371	0.0293988	-0.909695	0.00115212	-0.731175	0.0234553	PH_hs_0012517	Homo sapiens C2 calcium-dependent domain containing 4C (C2CD4C)	1	126567	NM_001136263	NP_001129735.1	ENSG00000183186	ENST00000332235	ENSP00000328677
C2CD4C	-0.691371	0.0293988	-0.909695	0.00115212	-0.731175	0.0234553	PH_hs_0012517	Homo sapiens C2 calcium-dependent domain containing 4C (C2CD4C)	1	126567	NM_001136263	NP_001129735.1	ENSG00000183186	ENST00000332235	ENSP00000328677
C2orf16	-0.49517	0.725547	-2.40534	0.0238744	-2.17958	0.16892	PH_hs_0048011	Homo sapiens chromosome 2 open reading frame 16 (C2orf16)	1	84226	NM_032266	NP_115642.3	ENSG00000221843	ENST00000408964	ENSP00000386190
C2orf27B	-0.278935	0.0846964	0.291444	0.0447563	0.0204503	0.93046	PH_hs_0031815	Homo sapiens chromosome 2 open reading frame 27B (C2orf27B)	1	408029	NM_214461	NP_999626.1	NA	NA	NA
C2orf42	0.315769	0.0287678	-0.177482	0.07297	-0.0868263	0.217891	PH_hs_0024934	Homo sapiens chromosome 2 open reading frame 42 (C2orf42)	1	54980	NM_017880	NP_060350.1	ENSG00000115998	"ENST00000264434,ENST00000420306,ENST00000447804,ENST00000417865,ENST00000419381,ENST00000470096,ENST00000457952,ENST00000428010,ENST00000425268,ENST00000428751,ENST00000417203,ENST00000495353,ENST00000487560,ENST00000464505"	"ENSP00000264434,ENSP00000404515,ENSP00000396751,ENSP00000407799,ENSP00000389921,ENSP00000391119,ENSP00000394401,ENSP00000388437,ENSP00000405955,ENSP00000399442"
C2orf50	0.0389452	0.78437	0.428749	0.0628832	0.420208	0.00704172	PH_hs_0044193	Homo sapiens chromosome 2 open reading frame 50 (C2orf50)	1	130813	NM_182500	NP_872306.1	ENSG00000150873	"ENST00000381585,ENST00000405022"	"ENSP00000370997,ENSP00000384186"
C2orf54	-0.0578931	0.891388	0.471171	0.449108	0.948969	0.00808048	PH_hs_0011428	Homo sapiens chromosome 2 open reading frame 54 (C2orf54)	1	79919	"NM_024861,NM_001085437"	"NP_079137.3,NP_001078906.2"	ENSG00000172478	"ENST00000402775,ENST00000307486,ENST00000388934,ENST00000414499,ENST00000454476"	"ENSP00000385338,ENSP00000302779,ENSP00000373586,ENSP00000390935,ENSP00000394874"
C2orf57	0.097532	0.571545	0.399927	0.0634651	0.467021	0.0255679	PH_hs_0005377	Homo sapiens chromosome 2 open reading frame 57 (C2orf57)	1	165100	NM_152614	NP_689827.2	ENSG00000177673	ENST00000313965	ENSP00000315557
C2orf61	-0.252565	0.394683	-1.04896	0.0975835	-1.32979	0.0112598	PH_hs_0045337	Homo sapiens chromosome 2 open reading frame 61 (C2orf61)	1	285051	NM_001163561	NP_001157033.1	ENSG00000239605	"ENST00000496939,ENST00000464527,ENST00000482548,ENST00000449846,ENST00000294947,ENST00000445927"	"ENSP00000414210,ENSP00000294947,ENSP00000408527"
C2orf72	-0.657893	0.0173654	-0.293231	0.541037	-0.506065	0.139914	PH_hs_0028766	Homo sapiens chromosome 2 open reading frame 72 (C2orf72)	1	257407	NM_001144994	NP_001138466.1	ENSG00000204128	"ENST00000373640,ENST00000477463,ENST00000463834"	ENSP00000362743
C2orf72	0.146251	0.27904	0.576064	0.0540657	0.501053	0.0260215	PH_hs_0035352	Homo sapiens chromosome 2 open reading frame 72 (C2orf72)	1	257407	NM_001144994	NP_001138466.1	ENSG00000204128	"ENST00000373640,ENST00000477463,ENST00000463834"	ENSP00000362743
C2orf72	0.146251	0.27904	0.576064	0.0540657	0.501053	0.0260215	PH_hs_0035352	Homo sapiens chromosome 2 open reading frame 72 (C2orf72)	1	257407	NM_001144994	NP_001138466.1	ENSG00000204128	"ENST00000373640,ENST00000477463,ENST00000463834"	ENSP00000362743
C2orf78	-0.337167	0.376094	-4.42795	0.345667	-9.48209	6.77e-05	PH_hs_0033892	Homo sapiens chromosome 2 open reading frame 78 (C2orf78)	1	388960	NM_001080474	NP_001073943.1	ENSG00000187833	ENST00000409561	ENSP00000387124
C3orf33	0.352015	0.157594	-0.360523	0.308192	-0.554849	0.03449	PH_hs_0028203	Homo sapiens chromosome 3 open reading frame 33 (C3orf33)	1	285315	NM_173657	NP_775928.1	ENSG00000174928	"ENST00000482061,ENST00000340171,ENST00000465810,ENST00000486435,ENST00000534941"	"ENSP00000418410,ENSP00000342512,ENSP00000420246,ENSP00000417361,ENSP00000445446"
C3orf38	-0.534278	0.0346048	-0.174741	0.279798	-0.0702338	0.785605	PH_hs_0048880	Homo sapiens chromosome 3 open reading frame 38 (C3orf38)	1	285237	NM_173824	NP_776185.2	ENSG00000179021	"ENST00000318887,ENST00000486971,ENST00000464919,ENST00000485219"	"ENSP00000322469,ENSP00000418774"
C3orf80	0.311205	0.0954954	0.0712937	0.834483	0.515839	0.00793301	PH_hs_0035646	Homo sapiens chromosome 3 open reading frame 80 (C3orf80)	1	401097	NM_001168214	NP_001161686.1	ENSG00000180044	"ENST00000490320,ENST00000610477,ENST00000326474"	ENSP00000313324
C4B|C4A|C4B_2	-0.144219	0.165244	0.0871466	0.559387	0.331916	0.0358885	PH_hs_0031857	Homo sapiens complement component 4B (Chido blood group)|Homo sapiens complement component 4A (Rodgers blood group)|Homo sapiens complement component 4B (Chido blood group)	4	721|720|100293534	"NM_001002029|NM_001252204,NM_007293|NM_001242823"	"NP_001002029.3|NP_001239133.1,NP_009224.2|NP_001229752.1"	ENSG00000236625|ENSG00000244207|ENSG00000233312	"ENST00000449788,ENST00000466309,ENST00000479863,ENST00000466356,ENST00000469413,ENST00000494210,ENST00000473162,ENST00000496668,ENST00000473927,ENST00000483198,ENST00000462943,ENST00000480076,ENST00000459759,ENST00000546399|ENST00000375295,ENST00000491759,ENST00000488233,ENST00000467619,ENST00000488360,ENST00000488693,ENST00000492166,ENST00000490545,ENST00000470477,ENST00000475612,ENST0000048252…	"ENSP00000414200,ENSP00000446528|ENSP00000364444,ENSP00000449828,ENSP00000484103|ENSP00000412786,ENSP00000449433"
C5AR1	-0.230685	0.460985	-0.0354487	0.876979	-0.635527	0.0241512	PH_hs_0030878	Homo sapiens complement component 5a receptor 1 (C5AR1)	1	728	NM_001736	NP_001727.1	ENSG00000197405	"ENST00000595501,ENST00000594787,ENST00000355085"	"ENSP00000470613,ENSP00000347197"
C5orf30	0.0177013	0.805296	0.309987	0.0689752	0.348711	0.0132557	PH_hs_0002282	Homo sapiens chromosome 5 open reading frame 30 (C5orf30)	1	90355	NM_033211	NP_149988.1	ENSG00000181751	"ENST00000319933,ENST00000515669,ENST00000510890"	"ENSP00000326110,ENSP00000422836,ENSP00000421270"
C5orf34	-0.430122	0.0277069	-0.196729	0.116667	0.072836	0.70424	PH_hs_0004965	Homo sapiens chromosome 5 open reading frame 34 (C5orf34)	1	375444	NM_198566	NP_940968.1	ENSG00000172244	"ENST00000306862,ENST00000506213,ENST00000503655,ENST00000509489,ENST00000514462"	"ENSP00000303490,ENSP00000426724,ENSP00000424486"
C5orf49	0.33162	0.110986	0.851462	0.0241033	0.991289	0.0128228	PH_hs_0046256	Homo sapiens chromosome 5 open reading frame 49 (C5orf49)	1	134121	NM_001089584	NP_001083053.1	ENSG00000215217	"ENST00000399810,ENST00000509627"	"ENSP00000382708,ENSP00000426019"
C5orf49	0.33162	0.110986	0.851462	0.0241033	0.991289	0.0128228	PH_hs_0046256	Homo sapiens chromosome 5 open reading frame 49 (C5orf49)	1	134121	NM_001089584	NP_001083053.1	ENSG00000215217	"ENST00000399810,ENST00000509627"	"ENSP00000382708,ENSP00000426019"
C5orf58	-0.219628	0.052289	-0.219628	0.0454892	-0.219628	0.0378537	PH_hs_0042192	Homo sapiens chromosome 5 open reading frame 58 (C5orf58)	1	133874	NM_001102609	NP_001096079.1	ENSG00000234511	"ENST00000521850,ENST00000517575,ENST00000524171,ENST00000421269,ENST00000518395,ENST00000593851"
C5orf58	-0.219628	0.052289	-0.219628	0.0454892	-0.219628	0.0378537	PH_hs_0042192	Homo sapiens chromosome 5 open reading frame 58 (C5orf58)	1	133874	NM_001102609	NP_001096079.1	ENSG00000234511	"ENST00000521850,ENST00000517575,ENST00000524171,ENST00000421269,ENST00000518395,ENST00000593851"
C5orf58	-0.219628	0.052289	-0.219628	0.0454892	-0.219628	0.0378537	PH_hs_0042192	Homo sapiens chromosome 5 open reading frame 58 (C5orf58)	1	133874	NM_001102609	NP_001096079.1	ENSG00000234511	"ENST00000521850,ENST00000517575,ENST00000524171,ENST00000421269,ENST00000518395,ENST00000593851"
C5orf63	-0.257115	0.101852	-0.399548	0.43839	-0.613915	0.012582	PH_hs_0046412	Homo sapiens chromosome 5 open reading frame 63 (C5orf63)	1	401207	NM_001164478	NP_001157950.1	ENSG00000164241	"ENST00000508527,ENST00000606937,ENST00000607731,ENST00000606042,ENST00000509733,ENST00000515558,ENST00000535381,ENST00000296662"	"ENSP00000475157,ENSP00000475810,ENSP00000476160,ENSP00000475733,ENSP00000475415,ENSP00000454153,ENSP00000453964"
C5orf64	0.47603	0.510397	0.792602	0.0610331	1.39586	0.0138498	PH_hs_0042661	Homo sapiens chromosome 5 open reading frame 64 (C5orf64)	1	285668	NM_173667	NP_775938.1	ENSG00000178722	"ENST00000507461,ENST00000511407,ENST00000505642,ENST00000510414,ENST00000502395,ENST00000313303"
C5orf66	0.392551	0.751208	-0.0892956	0.92829	-1.3575	0.00348943	PH_hs_0046937	Homo sapiens chromosome 5 open reading frame 66 (C5orf66)	1	100996485	NM_001277348	NP_001264277.1	NA	NA	NA
C6orf222	-0.323861	0.294614	-0.484936	0.320813	-0.892404	0.0281608	PH_hs_0009836	Homo sapiens chromosome 6 open reading frame 222 (C6orf222)	1	389384	NM_001010903	NP_001010903.3	ENSG00000189325	ENST00000437635	ENSP00000418983
C6orf223	0.105878	0.378298	0.378135	0.0465856	0.471497	0.0215908	PH_hs_0022663	Homo sapiens chromosome 6 open reading frame 223 (C6orf223)	1	221416	"NM_001171992,NM_153246"	"NP_001165463.1,NP_694978.2"	ENSG00000181577	"ENST00000442114,ENST00000336600,ENST00000439969,ENST00000448947"	"ENSP00000477091,ENSP00000426159,ENSP00000423262"
C6orf223	0.105878	0.378298	0.378135	0.0465856	0.471497	0.0215908	PH_hs_0022663	Homo sapiens chromosome 6 open reading frame 223 (C6orf223)	1	221416	"NM_001171992,NM_153246"	"NP_001165463.1,NP_694978.2"	ENSG00000181577	"ENST00000442114,ENST00000336600,ENST00000439969,ENST00000448947"	"ENSP00000477091,ENSP00000426159,ENSP00000423262"
C6orf229	-0.284644	0.396155	-0.870745	0.155705	-1.28764	0.0234485	PH_hs_0062645	Homo sapiens chromosome 6 open reading frame 229 (C6orf229)	1	101928603	NM_001282492	NP_001269421.1	ENSG00000260286	ENST00000565469	ENSP00000454913
C6orf7	0.0811878	0.630004	-0.501096	0.0125561	-0.387217	0.0611433	PH_hs_0060436	PREDICTED: Homo sapiens chromosome 6 open reading frame 7 (C6orf7)	1	89758	"XM_011536237,XM_011536236,NR_131786"	"XP_011534539.1,XP_011534538.1,-"	NA	NA	NA
C7orf31	-0.170919	0.210913	-0.20705	0.0444216	-0.000784678	0.994147	PH_hs_0061660	Homo sapiens chromosome 7 open reading frame 31 (C7orf31)	1	136895	NM_138811	NP_620166.3	ENSG00000153790	"ENST00000409280,ENST00000283905,ENST00000443822,ENST00000415598,ENST00000444434"	"ENSP00000386604,ENSP00000283905,ENSP00000388472,ENSP00000391212,ENSP00000403281"
C7orf55	-0.355065	0.0245482	-0.199606	0.126838	0.0361695	0.833386	PH_hs_0044816	Homo sapiens chromosome 7 open reading frame 55 (C7orf55)	1	154791	"NM_197964,NR_073060,NR_073058,NR_073059"	"NP_932068.2,-,-,-"	ENSG00000164898	"ENST00000468383,ENST00000481123,ENST00000482181,ENST00000488886,ENST00000297534"	ENSP00000297534
C8orf46	-0.312039	0.380199	-0.142555	0.763979	-0.956311	0.00666839	PH_hs_0022737	Homo sapiens chromosome 8 open reading frame 46 (C8orf46)	1	254778	NM_152765	NP_689978.2	ENSG00000169085	"ENST00000482608,ENST00000519702,ENST00000498712,ENST00000470796,ENST00000490228,ENST00000305454,ENST00000521495,ENST00000521813,ENST00000460144,ENST00000450307,ENST00000484919,ENST00000522977,ENST00000480005,ENST00000485639,ENST00000488582"	"ENSP00000302260,ENSP00000430501,ENSP00000430388,ENSP00000473681,ENSP00000430141,ENSP00000429883"
C9orf89	0.213207	0.076014	-0.0773871	0.781608	-0.278992	0.0275628	PH_hs_0044288	Homo sapiens chromosome 9 open reading frame 89 (C9orf89)	1	84270	NM_032310	NP_115686.3	ENSG00000165233	"ENST00000375464,ENST00000466409,ENST00000495641,ENST00000466929,ENST00000468781,ENST00000490488,ENST00000498243,ENST00000475574,ENST00000488630"	"ENSP00000364613,ENSP00000437237"
C9orf92	0.0576743	0.906569	-0.181094	0.536299	0.410681	0.0242824	PH_hs_0062706	Homo sapiens chromosome 9 open reading frame 92 (C9orf92)	1	100129385	"NR_073471,NM_001271829"	"-,NP_001258758.1"	ENSG00000205549	"ENST00000380685,ENST00000380683,ENST00000433347"	"ENSP00000370060,ENSP00000370058,ENSP00000412109"
CA2	0.19871	0.152907	0.303863	0.191551	0.439152	0.013121	PH_hs_0009339	Homo sapiens carbonic anhydrase II (CA2)	1	760	NM_000067	NP_000058.1	ENSG00000104267	"ENST00000285379,ENST00000520127,ENST00000520996,ENST00000518231,ENST00000522742"	"ENSP00000285379,ENSP00000428443,ENSP00000428947"
CA3	-0.582129	0.317771	-1.51275	0.0128087	-0.32437	0.594801	PH_hs_0004698	Homo sapiens carbonic anhydrase III (CA3)	1	761	NM_005181	NP_005172.1	ENSG00000164879	"ENST00000520921,ENST00000285381,ENST00000522207"	"ENSP00000429760,ENSP00000285381"
CA5B	-0.0258359	0.761016	-0.269715	0.108801	-0.224993	0.0470548	PH_hs_0039389	"Homo sapiens carbonic anhydrase VB, mitochondrial (CA5B)"	1	11238	NM_007220	NP_009151.1	ENSG00000169239	"ENST00000498004,ENST00000318636,ENST00000478923,ENST00000474624,ENST00000380319,ENST00000479740,ENST00000380313,ENST00000478341,ENST00000496188,ENST00000454127"	"ENSP00000418622,ENSP00000314099,ENSP00000417553,ENSP00000417236,ENSP00000417021"
CABLES1	0.0298362	0.813204	-0.359753	0.0279986	-0.545481	0.00660389	PH_hs_0044567	Homo sapiens Cdk5 and Abl enzyme substrate 1 (CABLES1)	1	91768	"NM_001256438,NM_001100619,NM_138375,NR_023359"	"NP_001243367.1,NP_001094089.1,NP_612384.1,-"	ENSG00000134508	"ENST00000400473,ENST00000579963,ENST00000580153,ENST00000256925,ENST00000582882,ENST00000583220,ENST00000580644,ENST00000578052,ENST00000585061,ENST00000420687"	"ENSP00000383321,ENSP00000464435,ENSP00000461994,ENSP00000256925,ENSP00000476575,ENSP00000413851"
CABLES1	0.0298362	0.813204	-0.359753	0.0279986	-0.545481	0.00660389	PH_hs_0044567	Homo sapiens Cdk5 and Abl enzyme substrate 1 (CABLES1)	1	91768	"NM_001256438,NM_001100619,NM_138375,NR_023359"	"NP_001243367.1,NP_001094089.1,NP_612384.1,-"	ENSG00000134508	"ENST00000400473,ENST00000579963,ENST00000580153,ENST00000256925,ENST00000582882,ENST00000583220,ENST00000580644,ENST00000578052,ENST00000585061,ENST00000420687"	"ENSP00000383321,ENSP00000464435,ENSP00000461994,ENSP00000256925,ENSP00000476575,ENSP00000413851"
CABLES1	-0.0645066	0.596276	-0.336469	0.0138689	-0.256856	0.0659066	PH_hs_0001608	Homo sapiens Cdk5 and Abl enzyme substrate 1 (CABLES1)	1	91768	"NM_001256438,NM_001100619,NM_138375,NR_023359"	"NP_001243367.1,NP_001094089.1,NP_612384.1,-"	ENSG00000134508	"ENST00000400473,ENST00000579963,ENST00000580153,ENST00000256925,ENST00000582882,ENST00000583220,ENST00000580644,ENST00000578052,ENST00000585061,ENST00000420687"	"ENSP00000383321,ENSP00000464435,ENSP00000461994,ENSP00000256925,ENSP00000476575,ENSP00000413851"
CABP4	-0.444107	0.0400207	-0.447797	0.0383295	-0.439747	0.0404411	PH_hs_0008409	Homo sapiens calcium binding protein 4 (CABP4)	1	57010	NM_145200	NP_660201.1	ENSG00000175544	"ENST00000538060,ENST00000438189,ENST00000542025,ENST00000545040,ENST00000542233,ENST00000325656,ENST00000545777"	"ENSP00000401555,ENSP00000324960,ENSP00000439145"
CABP4	-0.444107	0.0400207	-0.447797	0.0383295	-0.439747	0.0404411	PH_hs_0008409	Homo sapiens calcium binding protein 4 (CABP4)	1	57010	NM_145200	NP_660201.1	ENSG00000175544	"ENST00000538060,ENST00000438189,ENST00000542025,ENST00000545040,ENST00000542233,ENST00000325656,ENST00000545777"	"ENSP00000401555,ENSP00000324960,ENSP00000439145"
CABP4	-0.444107	0.0400207	-0.447797	0.0383295	-0.439747	0.0404411	PH_hs_0008409	Homo sapiens calcium binding protein 4 (CABP4)	1	57010	NM_145200	NP_660201.1	ENSG00000175544	"ENST00000538060,ENST00000438189,ENST00000542025,ENST00000545040,ENST00000542233,ENST00000325656,ENST00000545777"	"ENSP00000401555,ENSP00000324960,ENSP00000439145"
CABYR	-0.0953371	0.615331	-0.773092	0.0015544	-0.159213	0.780798	PH_hs_0063551	Homo sapiens calcium binding tyrosine-(Y)	1	26256	"NM_153768,NM_012189"	"NP_722452.1,NP_036321.2"	ENSG00000154040	"ENST00000399496,ENST00000627314,ENST00000399481,ENST00000327201,ENST00000463087,ENST00000579956,ENST00000584752,ENST00000585037,ENST00000581872,ENST00000486759,ENST00000577705,ENST00000415309,ENST00000621648,ENST00000581397,ENST00000399499,ENST00000579102,ENST00000631138,ENST00000582229,ENST00000625720"	"ENSP00000382419,ENSP00000486801,ENSP00000382404,ENSP00000317095,ENSP00000432870,ENSP00000464595,ENSP00000462009,ENSP00000463737,ENSP00000462474,ENSP00000431142,ENSP00000463781,ENSP00000399973,ENSP00000483621,ENSP00000462811,ENSP00000382421,ENSP00000462748,ENSP00000462947"
CACNA1G	-0.198658	0.853855	-2.41421	0.0329514	-1.77998	0.152151	PH_hs_0048264	"Homo sapiens calcium channel, voltage-dependent, T type, alpha 1G subunit (CACNA1G)"	1	8913	"NM_001256361,NM_001256360,NM_001256359,NM_198396,NM_198388,NM_198387,NM_198386,NM_198385,NM_198384,NM_198383,NM_198382,NM_198380,NM_198379,NM_198378,NM_198376,NM_018896,NM_001256334,NM_001256333,NM_001256332,NM_001256331,NM_001256330,NM_001256329,NM_001256328,NM_001256327,NM_001256326,NM_001256325,NM_001256324,NM_198377,NR_046058,NR_046057,NR_046056,NR_046055,NR_046054"	"NP_001243290.1,NP_001243289.1,NP_001243288.1,NP_938406.1,NP_938202.1,NP_938201.1,NP_938200.1,NP_938199.1,NP_938198.1,NP_938197.1,NP_938196.1,NP_938194.1,NP_938193.1,NP_938192.1,NP_938190.1,NP_061496.2,NP_001243263.1,NP_001243262.1,NP_001243261.1,NP_001243260.1,NP_001243259.1,NP_001243258.1,NP_001243257.1,NP_001243256.1,NP_001243255.1,NP_001243254.1,NP_001243253.1,NP_938191.2,-,-,-,-,-"	ENSG00000006283	"ENST00000360761,ENST00000352832,ENST00000442258,ENST00000416767,ENST00000502264,ENST00000512389,ENST00000513964,ENST00000514717,ENST00000510366,ENST00000503485,ENST00000507510,ENST00000511765,ENST00000507336,ENST00000506406,ENST00000504076,ENST00000513689,ENST00000507609,ENST00000503436,ENST00000510115,ENST00000515165,ENST00000514181,ENST00000515765,ENST00000514079,ENST00000507896,ENST0000051176…	"ENSP00000353990,ENSP00000339302,ENSP00000409759,ENSP00000392390,ENSP00000425522,ENSP00000426261,ENSP00000425451,ENSP00000422407,ENSP00000426814,ENSP00000427238,ENSP00000423112,ENSP00000427247,ENSP00000420918,ENSP00000426313,ENSP00000425153,ENSP00000426172,ENSP00000423045,ENSP00000427231,ENSP00000427173,ENSP00000426098,ENSP00000425698,ENSP00000426232,ENSP00000423317,ENSP00000421518,ENSP0000042466…
CACNG1	-0.166605	0.636992	-0.232169	0.58633	-0.94232	0.0439496	PH_hs_0008881	"Homo sapiens calcium channel, voltage-dependent, gamma subunit 1 (CACNG1)"	1	786	NM_000727	NP_000718.1	ENSG00000108878	ENST00000226021	ENSP00000226021
CACNG2	0.150367	0.834165	0.812573	0.163327	1.06895	0.020432	PH_hs_0013734	"Homo sapiens calcium channel, voltage-dependent, gamma subunit 2 (CACNG2)"	1	10369	NM_006078	NP_006069.1	ENSG00000166862	"ENST00000300105,ENST00000480002"	ENSP00000300105
CACNG6	0.487352	0.143493	0.674683	0.204706	0.826256	0.0215469	PH_hs_0016211	"Homo sapiens calcium channel, voltage-dependent, gamma subunit 6 (CACNG6)"	1	59285	"NM_145815,NM_145814,NM_031897"	"NP_665814.1,NP_665813.1,NP_114103.2"	ENSG00000130433	"ENST00000252729,ENST00000346968,ENST00000352529"	"ENSP00000252729,ENSP00000319097,ENSP00000319135"
CACNG7	0.374774	0.14228	0.912243	0.021071	0.744461	0.0559852	PH_hs_0016210	"Homo sapiens calcium channel, voltage-dependent, gamma subunit 7 (CACNG7)"	1	59284	NM_031896	NP_114102.2	ENSG00000105605	"ENST00000468076,ENST00000391767,ENST00000222212,ENST00000391766"	"ENSP00000375647,ENSP00000222212,ENSP00000375646"
CACNG8	-0.329962	0.76354	-3.27943	0.0199029	-1.48477	0.226514	PH_hs_0061490	"Homo sapiens calcium channel, voltage-dependent, gamma subunit 8 (CACNG8)"	1	59283	NM_031895	NP_114101.4	ENSG00000142408	ENST00000270458	ENSP00000270458
CADM3	0.0695113	0.407235	0.462321	0.0332649	0.410475	0.0721932	PH_hs_0024045	Homo sapiens cell adhesion molecule 3 (CADM3)	1	57863	"NM_001127173,NM_021189"	"NP_001120645.1,NP_067012.1"	ENSG00000162706	"ENST00000368124,ENST00000368125,ENST00000416746"	"ENSP00000357106,ENSP00000357107,ENSP00000387802"
CADPS2	0.202409	0.296272	0.542798	0.0525303	0.394921	0.182446	PH_hs_0046228	Homo sapiens Ca++-dependent secretion activator 2 (CADPS2)	1	93664	"NM_001167940,NM_001009571,NM_017954"	"NP_001161412.1,NP_001009571.2,NP_060424.9"	ENSG00000081803	"ENST00000462699,ENST00000412584,ENST00000449022,ENST00000397721,ENST00000476131,ENST00000334010,ENST00000615869,ENST00000313070"	"ENSP00000419418,ENSP00000400401,ENSP00000398481,ENSP00000380833,ENSP00000333940,ENSP00000484355,ENSP00000325581"
CALCR	-0.000597385	0.997387	0.0658477	0.847894	-0.444848	0.041383	PH_hs_0000072	Homo sapiens calcitonin receptor (CALCR)	1	799	"NM_001164738,NM_001164737,NM_001742"	"NP_001158210.1,NP_001158209.1,NP_001733.1"	ENSG00000004948	"ENST00000421592,ENST00000394441,ENST00000426151,ENST00000423724,ENST00000415529,ENST00000359558,ENST00000360249"	"ENSP00000399552,ENSP00000377959,ENSP00000389295,ENSP00000391369,ENSP00000413179,ENSP00000352561,ENSP00000353385"
CALCRL	0.204903	0.441444	0.394777	0.325642	0.347177	0.0397858	PH_hs_0029234	Homo sapiens calcitonin receptor-like (CALCRL)	1	10203	"NM_001271751,NM_005795"	"NP_001258680.1,NP_005786.1"	ENSG00000064989	"ENST00000392370,ENST00000409998,ENST00000410068,ENST00000447403,ENST00000410102,ENST00000474212,ENST00000485973,ENST00000461244,ENST00000479784"	"ENSP00000376177,ENSP00000386972,ENSP00000387190,ENSP00000415626,ENSP00000386599"
CALHM1	-0.116596	0.778591	-1.07763	0.041491	-0.414619	0.51283	PH_hs_0018747	Homo sapiens calcium homeostasis modulator 1 (CALHM1)	1	255022	NM_001001412	NP_001001412.3	ENSG00000185933	ENST00000329905	ENSP00000329926
CALHM3	-0.445273	0.46977	-0.253973	0.562383	-0.979517	0.0516489	PH_hs_0042059	Homo sapiens calcium homeostasis modulator 3 (CALHM3)	1	119395	NM_001129742	NP_001123214.1	ENSG00000183128	ENST00000369783	ENSP00000358798
CALML4	0.019451	0.786988	-0.300747	0.116959	-0.177609	0.0475107	PH_hs_0034671	Homo sapiens calmodulin-like 4 (CALML4)	1	91860	"NM_033429,NM_001031733"	"NP_219501.2,NP_001026903.2"	ENSG00000129007	"ENST00000478113,ENST00000395465,ENST00000448060,ENST00000395463,ENST00000467188,ENST00000467889,ENST00000354678,ENST00000540479"	"ENSP00000432629,ENSP00000378848,ENSP00000400755,ENSP00000435285,ENSP00000419081,ENSP00000456532,ENSP00000438177"
CALN1	0.240135	0.254469	0.423728	0.260972	0.574032	0.0382104	PH_hs_0013241	Homo sapiens calneuron 1 (CALN1)	1	83698	"NM_001017440,NM_031468"	"NP_001017440.1,NP_113656.2"	ENSG00000183166	"ENST00000329008,ENST00000395275,ENST00000395276,ENST00000431984,ENST00000446128,ENST00000405452"	"ENSP00000332498,ENSP00000378690,ENSP00000378691,ENSP00000410704,ENSP00000411806,ENSP00000384354"
CALN1	0.324793	0.0762638	0.77893	0.0127081	0.751983	0.0104463	PH_hs_0005635	Homo sapiens calneuron 1 (CALN1)	1	83698	"NM_001017440,NM_031468"	"NP_001017440.1,NP_113656.2"	ENSG00000183166	"ENST00000329008,ENST00000395275,ENST00000395276,ENST00000431984,ENST00000446128,ENST00000405452"	"ENSP00000332498,ENSP00000378690,ENSP00000378691,ENSP00000410704,ENSP00000411806,ENSP00000384354"
CALN1	0.324793	0.0762638	0.77893	0.0127081	0.751983	0.0104463	PH_hs_0005635	Homo sapiens calneuron 1 (CALN1)	1	83698	"NM_001017440,NM_031468"	"NP_001017440.1,NP_113656.2"	ENSG00000183166	"ENST00000329008,ENST00000395275,ENST00000395276,ENST00000431984,ENST00000446128,ENST00000405452"	"ENSP00000332498,ENSP00000378690,ENSP00000378691,ENSP00000410704,ENSP00000411806,ENSP00000384354"
CAMK2B	0.305345	0.167478	0.679242	0.00546854	0.906189	0.00775086	PH_hs_0043481	Homo sapiens calcium/calmodulin-dependent protein kinase II beta (CAMK2B)	1	816	"NM_001220,NM_172080,NM_172082,NM_172078,NM_172083,NM_172084,NM_172081,NM_172079"	"NP_001211.3,NP_742077.1,NP_742079.1,NP_742075.1,NP_742080.1,NP_742081.1,NP_742078.1,NP_742076.1"	ENSG00000058404	"ENST00000350811,ENST00000395749,ENST00000523845,ENST00000425809,ENST00000440254,ENST00000358707,ENST00000466584,ENST00000353625,ENST00000497584,ENST00000489429,ENST00000353185,ENST00000347193,ENST00000346990,ENST00000258682,ENST00000395747,ENST00000433930,ENST00000497127,ENST00000495819,ENST00000415369,ENST00000424197,ENST00000484972,ENST00000421607,ENST00000462128,ENST00000470984,ENST0000042720…	"ENSP00000326375,ENSP00000379098,ENSP00000428912,ENSP00000410445,ENSP00000397937,ENSP00000351542,ENSP00000326427,ENSP00000326600,ENSP00000326544,ENSP00000326518,ENSP00000258682,ENSP00000379096,ENSP00000388951,ENSP00000390419,ENSP00000400387,ENSP00000388445,ENSP00000390292"
CAMK2B	0.305345	0.167478	0.679242	0.00546854	0.906189	0.00775086	PH_hs_0043481	Homo sapiens calcium/calmodulin-dependent protein kinase II beta (CAMK2B)	1	816	"NM_001220,NM_172080,NM_172082,NM_172078,NM_172083,NM_172084,NM_172081,NM_172079"	"NP_001211.3,NP_742077.1,NP_742079.1,NP_742075.1,NP_742080.1,NP_742081.1,NP_742078.1,NP_742076.1"	ENSG00000058404	"ENST00000350811,ENST00000395749,ENST00000523845,ENST00000425809,ENST00000440254,ENST00000358707,ENST00000466584,ENST00000353625,ENST00000497584,ENST00000489429,ENST00000353185,ENST00000347193,ENST00000346990,ENST00000258682,ENST00000395747,ENST00000433930,ENST00000497127,ENST00000495819,ENST00000415369,ENST00000424197,ENST00000484972,ENST00000421607,ENST00000462128,ENST00000470984,ENST0000042720…	"ENSP00000326375,ENSP00000379098,ENSP00000428912,ENSP00000410445,ENSP00000397937,ENSP00000351542,ENSP00000326427,ENSP00000326600,ENSP00000326544,ENSP00000326518,ENSP00000258682,ENSP00000379096,ENSP00000388951,ENSP00000390419,ENSP00000400387,ENSP00000388445,ENSP00000390292"
CAMK2D	-0.225593	0.121065	-0.314951	0.0339434	0.0797281	0.761706	PH_hs_0063446	Homo sapiens calcium/calmodulin-dependent protein kinase II delta (CAMK2D)	1	817	"NM_001221,NM_172127,NM_172128"	"NP_001212.2,NP_742125.1,NP_742126.1"	ENSG00000145349	"ENST00000394524,ENST00000513132,ENST00000511664,ENST00000342666,ENST00000515496,ENST00000514328,ENST00000394522,ENST00000505990,ENST00000379773,ENST00000508738,ENST00000509594,ENST00000509907,ENST00000505132,ENST00000296402"	"ENSP00000378032,ENSP00000424247,ENSP00000425824,ENSP00000339740,ENSP00000423482,ENSP00000423677,ENSP00000378030,ENSP00000424245,ENSP00000369098,ENSP00000422566,ENSP00000423753,ENSP00000296402"
CAMTA1	0.416489	0.0348986	-0.0301957	0.817169	-0.046683	0.836264	PH_hs_0023251	Homo sapiens calmodulin binding transcription activator 1 (CAMTA1)	1	23261	NM_015215	NP_056030.1	ENSG00000171735	"ENST00000303635,ENST00000490738,ENST00000476163,ENST00000473578,ENST00000557126,ENST00000467404,ENST00000461311,ENST00000486138,ENST00000482934,ENST00000470648,ENST00000461580,ENST00000472283,ENST00000467267,ENST00000495233,ENST00000490905,ENST00000476864"	"ENSP00000306522,ENSP00000451388,ENSP00000451510,ENSP00000450530,ENSP00000452184,ENSP00000452505,ENSP00000451443,ENSP00000451720,ENSP00000452024,ENSP00000452319"
CAND2	-0.200519	0.629067	-1.04249	0.00847681	-1.04249	0.00835441	PH_hs_0031882	Homo sapiens cullin-associated and neddylation-dissociated 2 (putative)	1	23066	"NM_012298,NM_001162499"	"NP_036430.1,NP_001155971.1"	ENSG00000144712	"ENST00000295989,ENST00000446928,ENST00000456430,ENST00000466558,ENST00000454887,ENST00000626378"	"ENSP00000295989,ENSP00000390996,ENSP00000387641,ENSP00000403093,ENSP00000486760"
CAND2	-0.200519	0.629067	-1.04249	0.00847681	-1.04249	0.00835441	PH_hs_0031882	Homo sapiens cullin-associated and neddylation-dissociated 2 (putative)	1	23066	"NM_012298,NM_001162499"	"NP_036430.1,NP_001155971.1"	ENSG00000144712	"ENST00000295989,ENST00000446928,ENST00000456430,ENST00000466558,ENST00000454887,ENST00000626378"	"ENSP00000295989,ENSP00000390996,ENSP00000387641,ENSP00000403093,ENSP00000486760"
CAPN2	-0.176277	0.254839	-0.281339	0.0363519	-0.267439	0.0318676	PH_hs_0016936	"Homo sapiens calpain 2, (m/II)"	1	824	"NM_001748,NM_001146068"	"NP_001739.2,NP_001139540.1"	ENSG00000162909	"ENST00000434648,ENST00000295006,ENST00000483579,ENST00000480581,ENST00000474026,ENST00000487223,ENST00000492565,ENST00000472601,ENST00000498027,ENST00000492664,ENST00000463997,ENST00000433674"	"ENSP00000399949,ENSP00000295006,ENSP00000413158"
CAPN2	-0.176277	0.254839	-0.281339	0.0363519	-0.267439	0.0318676	PH_hs_0016936	"Homo sapiens calpain 2, (m/II)"	1	824	"NM_001748,NM_001146068"	"NP_001739.2,NP_001139540.1"	ENSG00000162909	"ENST00000434648,ENST00000295006,ENST00000483579,ENST00000480581,ENST00000474026,ENST00000487223,ENST00000492565,ENST00000472601,ENST00000498027,ENST00000492664,ENST00000463997,ENST00000433674"	"ENSP00000399949,ENSP00000295006,ENSP00000413158"
CAPN8	0.287505	0.713933	0.605593	0.0894566	1.29799	0.0151447	PH_hs_0043436	Homo sapiens calpain 8 (CAPN8)	1	388743	NM_001143962	NP_001137434.1	ENSG00000203697	"ENST00000484873,ENST00000442247,ENST00000430824,ENST00000482401,ENST00000482183,ENST00000419193,ENST00000366873,ENST00000467384,ENST00000465098,ENST00000525760,ENST00000366872"	"ENSP00000436371,ENSP00000409233,ENSP00000390294,ENSP00000401665,ENSP00000355838,ENSP00000434013,ENSP00000435953,ENSP00000355837"
CAPN9	0.214149	0.78314	0.587062	0.20326	1.29416	0.0327085	PH_hs_0023968	Homo sapiens calpain 9 (CAPN9)	1	10753	"NM_016452,NM_006615"	"NP_057536.1,NP_006606.1"	ENSG00000135773	"ENST00000271971,ENST00000354537,ENST00000480004,ENST00000366666"	"ENSP00000271971,ENSP00000346538,ENSP00000355626"
CAPSL	0.135403	0.400417	0.538573	0.0205926	0.541901	0.0859824	PH_hs_0003620	Homo sapiens calcyphosine-like (CAPSL)	1	133690	"NM_001042625,NM_144647"	"NP_001036090.1,NP_653248.3"	ENSG00000152611	"ENST00000397367,ENST00000513623,ENST00000514524,ENST00000397366"	"ENSP00000380524,ENSP00000424806,ENSP00000421018,ENSP00000380523"
CARD10	-0.216824	0.793515	0.63115	0.177354	0.905517	0.0193647	PH_hs_0031262	"Homo sapiens caspase recruitment domain family, member 10 (CARD10)"	1	29775	NM_014550	NP_055365.2	ENSG00000100065	"ENST00000488141,ENST00000403299,ENST00000467812,ENST00000406271,ENST00000251973,ENST00000437756,ENST00000486118,ENST00000433485,ENST00000476871,ENST00000494166"	"ENSP00000384570,ENSP00000385799,ENSP00000251973,ENSP00000416239,ENSP00000393411"
CARD11	-0.171004	0.605724	-0.574202	0.0212252	-0.511972	0.222481	PH_hs_0015270	"Homo sapiens caspase recruitment domain family, member 11 (CARD11)"	1	84433	NM_032415	NP_115791.3	ENSG00000198286	"ENST00000396946,ENST00000480332,ENST00000355508,ENST00000356408"	"ENSP00000380150,ENSP00000347695,ENSP00000348779"
CARD16	-0.511035	0.183318	-1.28871	0.000516939	-0.674835	0.291344	PH_hs_0045309	"Homo sapiens caspase recruitment domain family, member 16 (CARD16)"	1	114769	"NM_001017534,NM_052889"	"NP_001017534.1,NP_443121.1"	ENSG00000204397	"ENST00000375706,ENST00000375704,ENST00000525374,ENST00000528513,ENST00000527065"	"ENSP00000364858,ENSP00000364856,ENSP00000433700,ENSP00000432485"
CARD17	-0.168206	0.473435	-0.967953	0.0336636	-0.619569	0.329562	PH_hs_0062680	"Homo sapiens caspase recruitment domain family, member 17 (CARD17)"	1	440068	NM_001007232	NP_001007233.1	ENSG00000255221	ENST00000375707	ENSP00000364859
CARTPT	0.0177512	0.810642	0.425858	0.0390437	0.460941	0.0851513	PH_hs_0030873	Homo sapiens CART prepropeptide (CARTPT)	1	9607	NM_004291	NP_004282.1	ENSG00000164326	"ENST00000296777,ENST00000513096"	ENSP00000296777
CASC5	0.708754	0.0512062	0.0748288	0.72248	0.00996373	0.909064	PH_hs_0020827	Homo sapiens cancer susceptibility candidate 5 (CASC5)	1	57082	"NM_144508,NM_170589"	"NP_653091.3,NP_733468.3"	ENSG00000137812	"ENST00000346991,ENST00000528975,ENST00000614337,ENST00000532056,ENST00000399668,ENST00000533001,ENST00000534204,ENST00000526913,ENST00000532406,ENST00000528967,ENST00000532347,ENST00000531626,ENST00000527044"	"ENSP00000335463,ENSP00000454087,ENSP00000454002,ENSP00000382576,ENSP00000453857,ENSP00000432565,ENSP00000436851,ENSP00000432654"
CASKIN2	-0.526037	0.514485	-1.67109	0.0398411	-1.02344	0.531546	PH_hs_0014158	Homo sapiens CASK interacting protein 2 (CASKIN2)	1	57513	"NM_020753,NM_001142643"	"NP_065804.2,NP_001136115.1"	ENSG00000177303	"ENST00000321617,ENST00000433559,ENST00000580021,ENST00000581870,ENST00000583258,ENST00000583246,ENST00000580075"	"ENSP00000325355,ENSP00000406963,ENSP00000464300,ENSP00000463211"
CASP7	0.230509	0.364458	-0.125496	0.138447	-0.292085	0.0182362	PH_hs_0000966	"Homo sapiens caspase 7, apoptosis-related cysteine peptidase (CASP7)"	1	840	"NM_001267058,NM_001267057,NM_001267056,NM_033340,NM_001227,NM_033339,NM_033338"	"NP_001253987.1,NP_001253986.1,NP_001253985.1,NP_203126.1,NP_001218.1,NP_203125.1,NP_203124.1"	ENSG00000165806	"ENST00000429617,ENST00000369331,ENST00000345633,ENST00000369318,ENST00000369315,ENST00000468790,ENST00000487232,ENST00000452490,ENST00000369321,ENST00000621607,ENST00000614447,ENST00000621345"	"ENSP00000400094,ENSP00000358337,ENSP00000298701,ENSP00000358324,ENSP00000358321,ENSP00000398107,ENSP00000358327,ENSP00000478999,ENSP00000478285,ENSP00000480584"
CASP7	0.770403	0.0486128	-0.0987147	0.820242	-0.391864	0.134267	PH_hs_0060754	"Homo sapiens caspase 7, apoptosis-related cysteine peptidase (CASP7)"	1	840	"NM_001267058,NM_001267057,NM_001267056,NM_033340,NM_001227,NM_033339,NM_033338"	"NP_001253987.1,NP_001253986.1,NP_001253985.1,NP_203126.1,NP_001218.1,NP_203125.1,NP_203124.1"	ENSG00000165806	"ENST00000429617,ENST00000369331,ENST00000345633,ENST00000369318,ENST00000369315,ENST00000468790,ENST00000487232,ENST00000452490,ENST00000369321,ENST00000621607,ENST00000614447,ENST00000621345"	"ENSP00000400094,ENSP00000358337,ENSP00000298701,ENSP00000358324,ENSP00000358321,ENSP00000398107,ENSP00000358327,ENSP00000478999,ENSP00000478285,ENSP00000480584"
CASZ1	-0.0754392	0.708844	0.278209	0.100849	0.253153	0.0369489	PH_hs_0023123	Homo sapiens castor zinc finger 1 (CASZ1)	1	54897	NM_017766	NP_060236.3	ENSG00000130940	"ENST00000377022,ENST00000478524,ENST00000447850,ENST00000344008,ENST00000490176,ENST00000496432,ENST00000492173,ENST00000478728,ENST00000472814"	"ENSP00000366221,ENSP00000467769,ENSP00000339445"
CATSPER1	0.375848	0.0545464	-0.24431	0.231808	-0.375455	0.0448257	PH_hs_0027956	"Homo sapiens cation channel, sperm associated 1 (CATSPER1)"	1	117144	NM_053054	NP_444282.3	ENSG00000175294	"ENST00000312106,ENST00000529244"	ENSP00000309052
CATSPERB	-0.0959998	0.627784	-0.370268	0.254924	-0.798113	0.0228611	PH_hs_0048469	Homo sapiens catsper channel auxiliary subunit beta (CATSPERB)	1	79820	NM_024764	NP_079040.2	ENSG00000133962	"ENST00000557036,ENST00000256343,ENST00000556429,ENST00000556901,ENST00000553329,ENST00000554560,ENST00000556661,ENST00000553676"	"ENSP00000451083,ENSP00000256343,ENSP00000450878,ENSP00000452224,ENSP00000451455,ENSP00000451047"
CBL	0.148002	0.209436	0.401368	0.0168126	0.435466	0.0160124	PH_hs_0060649	"Homo sapiens Cbl proto-oncogene, E3 ubiquitin protein ligase (CBL)"	1	867	NM_005188	NP_005179.2	ENSG00000110395	ENST00000264033	ENSP00000264033
CBL	0.148002	0.209436	0.401368	0.0168126	0.435466	0.0160124	PH_hs_0060649	"Homo sapiens Cbl proto-oncogene, E3 ubiquitin protein ligase (CBL)"	1	867	NM_005188	NP_005179.2	ENSG00000110395	ENST00000264033	ENSP00000264033
CBLB	0.317225	0.377655	0.825939	0.0903155	0.973249	0.0539176	PH_hs_0025558	"Homo sapiens Cbl proto-oncogene B, E3 ubiquitin protein ligase (CBLB)"	1	868	NM_170662	NP_733762.2	ENSG00000114423	"ENST00000394030,ENST00000264122,ENST00000476370,ENST00000407712,ENST00000403724,ENST00000405772,ENST00000438603,ENST00000447441,ENST00000443752"	"ENSP00000377598,ENSP00000264122,ENSP00000384170,ENSP00000384816,ENSP00000384938,ENSP00000409750,ENSP00000400949,ENSP00000393906"
CBS	0.156723	0.809993	0.494591	0.175486	0.945474	0.0337489	PH_hs_0022824	Homo sapiens cystathionine-beta-synthase (CBS)	1	875	"NM_001178009,NM_001178008,NM_000071"	"NP_001171480.1,NP_001171479.1,NP_000062.1"	ENSG00000160200	"ENST00000461686,ENST00000398158,ENST00000398165,ENST00000359624,ENST00000352178,ENST00000451248,ENST00000462349,ENST00000491776,ENST00000458223,ENST00000430013,ENST00000496485,ENST00000486098,ENST00000441030,ENST00000470912,ENST00000465732,ENST00000488526,ENST00000478709"	"ENSP00000381225,ENSP00000381231,ENSP00000352643,ENSP00000344460,ENSP00000402823,ENSP00000408014,ENSP00000405929,ENSP00000388235"
CBX2	-0.339677	0.594911	0.0298019	0.836579	0.804877	0.0102838	PH_hs_0024418	Homo sapiens chromobox homolog 2 (CBX2)	1	84733	NM_032647	NP_116036.1	ENSG00000173894	"ENST00000310942,ENST00000571484,ENST00000269399"	"ENSP00000308750,ENSP00000269399"
CBY3	0.216172	0.595878	0.142197	0.542977	-0.213382	0.0387494	PH_hs_0061744	Homo sapiens chibby homolog 3 (Drosophila)	1	646019	NM_001164444	NP_001157916.1	ENSG00000204659	ENST00000376974	ENSP00000366173
CC2D1B	0.0203765	0.803631	0.024994	0.822843	-0.205894	0.0542385	PH_hs_0016001	Homo sapiens coiled-coil and C2 domain containing 1B (CC2D1B)	1	200014	NM_032449	NP_115825.1	ENSG00000154222	"ENST00000470844,ENST00000371586,ENST00000491136,ENST00000284376,ENST00000438021,ENST00000460261,ENST00000450942,ENST00000460370,ENST00000492426,ENST00000485966,ENST00000494789"	"ENSP00000360642,ENSP00000284376,ENSP00000395921,ENSP00000402440"
CCDC142	-0.0264919	0.809864	0.345535	0.235985	0.363787	0.0141404	PH_hs_0048681	Homo sapiens coiled-coil domain containing 142 (CCDC142)	1	84865	NM_032779	NP_116168.3	ENSG00000135637	"ENST00000454193,ENST00000393965,ENST00000290418,ENST00000473278,ENST00000486335,ENST00000497232,ENST00000471713,ENST00000474681,ENST00000472962"	"ENSP00000415532,ENSP00000377537,ENSP00000290418"
CCDC149	0.0190637	0.818917	0.393672	0.0307762	0.552838	0.020736	PH_hs_0046220	Homo sapiens coiled-coil domain containing 149 (CCDC149)	1	91050	"NM_173463,NM_001130726"	"NP_775734.2,NP_001124198.1"	ENSG00000181982	"ENST00000504487,ENST00000389609,ENST00000502801,ENST00000507096,ENST00000508236,ENST00000324309,ENST00000512432"	"ENSP00000425715,ENSP00000374260,ENSP00000427529"
CCDC149	0.0190637	0.818917	0.393672	0.0307762	0.552838	0.020736	PH_hs_0046220	Homo sapiens coiled-coil domain containing 149 (CCDC149)	1	91050	"NM_173463,NM_001130726"	"NP_775734.2,NP_001124198.1"	ENSG00000181982	"ENST00000504487,ENST00000389609,ENST00000502801,ENST00000507096,ENST00000508236,ENST00000324309,ENST00000512432"	"ENSP00000425715,ENSP00000374260,ENSP00000427529"
CCDC152	-0.301842	0.719727	-1.67661	0.000361082	-1.17205	0.0781145	PH_hs_0042866	Homo sapiens coiled-coil domain containing 152 (CCDC152)	1	100129792	NM_001134848	NP_001128320.1	ENSG00000198865	"ENST00000361970,ENST00000388827"	"ENSP00000354888,ENSP00000373479"
CCDC162P	-0.230478	0.475706	0.0987011	0.283553	-0.298361	0.0210732	PH_hs_0033640	"Homo sapiens coiled-coil domain containing 162, pseudogene (CCDC162P)"	1	221262	NR_028595	-	ENSG00000203799	"ENST00000615766,ENST00000514758,ENST00000429614,ENST00000422819,ENST00000368966,ENST00000508210,ENST00000506861,ENST00000368965,ENST00000473454,ENST00000440451,ENST00000621947"
CCDC171	-0.587544	0.231542	-0.61531	0.409053	-0.94372	0.0470114	PH_hs_0035369	Homo sapiens coiled-coil domain containing 171 (CCDC171)	1	203238	NM_173550	NP_775821.2	ENSG00000164989	"ENST00000535968,ENST00000478913,ENST00000472806,ENST00000486641,ENST00000498725,ENST00000470191,ENST00000432954,ENST00000449575,ENST00000474193,ENST00000380701"	"ENSP00000438838,ENSP00000399526,ENSP00000409055,ENSP00000370077"
CCDC180|LOC100499484-C9ORF174	-0.160753	0.161936	-0.433339	0.00570895	-0.433339	0.00436716	PH_hs_0035533	Homo sapiens coiled-coil domain containing 180 (CCDC180)|Homo sapiens LOC100499484-C9orf174 readthrough (LOC100499484-C9ORF174)	4	100499483|57653	"NM_020893|NR_036527,NR_036529,NR_036528"	"NP_065944.2|-,-,-"	ENSG00000197816|ENSG00000255036	"ENST00000472746,ENST00000494917,ENST00000460482,ENST00000529487,ENST00000528678,ENST00000530011,ENST00000471314,ENST00000527182,ENST00000483504,ENST00000526038,ENST00000534189,ENST00000530551,ENST00000487976|ENST00000375206,ENST00000534123,ENST00000532526,ENST00000529787,ENST00000357054"	ENSP00000434727|
CCDC180|LOC100499484-C9ORF174	-0.160753	0.161936	-0.433339	0.00570895	-0.433339	0.00436716	PH_hs_0035533	Homo sapiens coiled-coil domain containing 180 (CCDC180)|Homo sapiens LOC100499484-C9orf174 readthrough (LOC100499484-C9ORF174)	4	100499483|57653	"NM_020893|NR_036527,NR_036529,NR_036528"	"NP_065944.2|-,-,-"	ENSG00000197816|ENSG00000255036	"ENST00000472746,ENST00000494917,ENST00000460482,ENST00000529487,ENST00000528678,ENST00000530011,ENST00000471314,ENST00000527182,ENST00000483504,ENST00000526038,ENST00000534189,ENST00000530551,ENST00000487976|ENST00000375206,ENST00000534123,ENST00000532526,ENST00000529787,ENST00000357054"	ENSP00000434727|
CCDC186	-0.506362	0.0405775	-0.0990313	0.533445	-0.227446	0.213184	PH_hs_0029270	Homo sapiens coiled-coil domain containing 186 (CCDC186)	1	55088	NM_018017	NP_060487.2	ENSG00000165813	"ENST00000369287,ENST00000428953,ENST00000497592,ENST00000490661,ENST00000369285,ENST00000369286"	"ENSP00000358293,ENSP00000415344,ENSP00000358291,ENSP00000358292"
CCDC23	0.0914553	0.747092	-0.120134	0.728158	-0.204479	0.0509274	PH_hs_0031544	Homo sapiens coiled-coil domain containing 23 (CCDC23)	1	374969	NM_199342	NP_955374.1	ENSG00000177868	"ENST00000372522,ENST00000372521,ENST00000497437"	"ENSP00000361600,ENSP00000361599"
CCDC57	0.0380266	0.688778	-0.331438	0.642987	-0.349408	0.0387582	PH_hs_0036186	Homo sapiens coiled-coil domain containing 57 (CCDC57)	1	284001	NM_198082	NP_932348.2	ENSG00000176155	"ENST00000584717,ENST00000583053,ENST00000389641,ENST00000392345,ENST00000583593,ENST00000582100,ENST00000392346,ENST00000419322,ENST00000483145,ENST00000582040,ENST00000327026,ENST00000475635,ENST00000392343,ENST00000577530,ENST00000578187,ENST00000578910,ENST00000581625,ENST00000582885,ENST00000392347"	"ENSP00000462653,ENSP00000374292,ENSP00000376156,ENSP00000463946,ENSP00000376157,ENSP00000408124,ENSP00000376154,ENSP00000462121,ENSP00000376158"
CCDC7	-0.185848	0.518931	-0.926369	0.00912829	-0.926369	0.00893406	PH_hs_0005334	Homo sapiens coiled-coil domain containing 7 (CCDC7)	1	79741	NM_024688	NP_078964.2	ENSG00000150076	"ENST00000375025,ENST00000375030,ENST00000375028,ENST00000302316,ENST00000623087"	"ENSP00000364165,ENSP00000364170,ENSP00000364168,ENSP00000303710,ENSP00000485403"
CCDC7	-0.185848	0.518931	-0.926369	0.00912829	-0.926369	0.00893406	PH_hs_0005334	Homo sapiens coiled-coil domain containing 7 (CCDC7)	1	79741	NM_024688	NP_078964.2	ENSG00000150076	"ENST00000375025,ENST00000375030,ENST00000375028,ENST00000302316,ENST00000623087"	"ENSP00000364165,ENSP00000364170,ENSP00000364168,ENSP00000303710,ENSP00000485403"
CCDC81	-0.266493	0.277153	-0.709172	0.208858	-0.422585	0.0285436	PH_hs_0008593	Homo sapiens coiled-coil domain containing 81 (CCDC81)	1	60494	"NM_021827,NM_001156474"	"NP_068599.3,NP_001149946.1"	ENSG00000149201	"ENST00000354755,ENST00000531271,ENST00000445632,ENST00000530845,ENST00000532466,ENST00000532215,ENST00000529603,ENST00000528728,ENST00000531587,ENST00000525247"	"ENSP00000346800,ENSP00000434959,ENSP00000415528,ENSP00000437165"
CCDC85B	-0.408989	0.0255943	-0.036366	0.797349	0.0685094	0.348757	PH_hs_0028935	Homo sapiens coiled-coil domain containing 85B (CCDC85B)	1	11007	NM_006848	NP_006839.2	ENSG00000175602	ENST00000312579	ENSP00000311695
CCDC88C	0.35156	0.146437	-0.198169	0.0435779	-0.0861153	0.430718	PH_hs_0035665	Homo sapiens coiled-coil domain containing 88C (CCDC88C)	1	440193	NM_001080414	NP_001073883.2	ENSG00000015133	"ENST00000556726,ENST00000389857,ENST00000334448,ENST00000557455,ENST00000555995,ENST00000557507,ENST00000554051,ENST00000554872,ENST00000553437,ENST00000389856,ENST00000553403,ENST00000554165,ENST00000556767,ENST00000331194"	"ENSP00000452406,ENSP00000374507,ENSP00000374506,ENSP00000451392,ENSP00000330332"
CCK	-0.225069	0.183477	-0.536341	0.143115	-0.657707	0.0336036	PH_hs_0042028	Homo sapiens cholecystokinin (CCK)	1	885	"NM_000729,NM_001174138"	"NP_000720.1,NP_001167609.1"	ENSG00000187094	"ENST00000334681,ENST00000396169,ENST00000434608,ENST00000484359"	"ENSP00000335657,ENSP00000379472,ENSP00000409124"
CCL1	-0.481351	0.0811348	-0.564435	0.0479969	-0.564435	0.047309	PH_hs_0004189	Homo sapiens chemokine (C-C motif)	1	6346	NM_002981	NP_002972.1	ENSG00000108702	ENST00000225842	ENSP00000225842
CCL11	0.171963	0.803667	0.469627	0.158089	1.07296	0.0404139	PH_hs_0003565	Homo sapiens chemokine (C-C motif)	1	6356	NM_002986	NP_002977.1	ENSG00000172156	ENST00000305869	ENSP00000302234
CCL14|CCL15-CCL14	-0.0159393	0.883486	0.443267	0.0207988	-0.0223373	0.952232	PH_hs_0049664	Homo sapiens chemokine (C-C motif)|Homo sapiens CCL15-CCL14 readthrough (NMD candidate)	4	6358|348249	"NM_032962,NM_032963|NR_027922,NR_027921"	"NP_116738.1,NP_116739.1|-,-"	ENSG00000277236	"ENST00000633434,ENST00000632700,ENST00000619040,ENST00000618060"	"ENSP00000488545,ENSP00000487948,ENSP00000483302,ENSP00000482426"
CCL15|CCL15-CCL14	-0.567026	0.307746	-1.99494	0.150718	-2.3862	0.00119513	PH_hs_0049665	Homo sapiens chemokine (C-C motif)|Homo sapiens CCL15-CCL14 readthrough (NMD candidate)	4	6359|348249	"NM_032965|NR_027922,NR_027921"	"NP_116741.2|-,-"	ENSG00000275718	"ENST00000614368,ENST00000617897"	"ENSP00000484262,ENSP00000484078"
CCL2	1.52862	0.0163624	-0.204525	0.409679	-1.17745	0.017627	PH_hs_0035772	Homo sapiens chemokine (C-C motif)	1	6347	NM_002982	NP_002973.1	ENSG00000108691	"ENST00000624362,ENST00000580907,ENST00000225831,ENST00000582017"	"ENSP00000462156,ENSP00000225831"
CCL2	0.81536	0.00521394	-0.0404215	0.608992	-0.759054	0.0199452	PH_hs_0015664	Homo sapiens chemokine (C-C motif)	1	6347	NM_002982	NP_002973.1	ENSG00000108691	"ENST00000624362,ENST00000580907,ENST00000225831,ENST00000582017"	"ENSP00000462156,ENSP00000225831"
CCL3|CCL3L1|CCL3L3	-0.194729	0.362029	-0.562846	0.0240968	-0.635466	0.0145309	PH_hs_0028953	Homo sapiens chemokine (C-C motif)|Homo sapiens chemokine (C-C motif)|Homo sapiens chemokine (C-C motif)	4	6348|6349|414062	NM_002983|NM_021006|NM_001001437	NP_002974.1|NP_066286.1|NP_001001437.2	ENSG00000274221|ENSG00000276085|ENSG00000276085	"ENST00000616221,ENST00000633297,ENST00000633327|ENST00000616702|ENST00000616702"	ENSP00000483712||
CCNJL	-0.473043	0.0905683	-1.34756	0.000546698	-1.13626	0.00217929	PH_hs_0035358	Homo sapiens cyclin J-like (CCNJL)	1	79616	NM_024565	NP_078841.3	ENSG00000135083	"ENST00000393977,ENST00000377503,ENST00000257536,ENST00000519673,ENST00000520748,ENST00000518764,ENST00000521643,ENST00000541762"	"ENSP00000377547,ENSP00000257536,ENSP00000427960,ENSP00000428836,ENSP00000446367"
CCNO	-0.451343	0.021068	-0.108707	0.526375	-0.171008	0.214126	PH_hs_0000382	Homo sapiens cyclin O (CCNO)	1	10309	NM_021147	NP_066970.3	ENSG00000152669	"ENST00000501463,ENST00000282572"	"ENSP00000422485,ENSP00000282572"
CCR5	0.169076	0.113261	0.524157	0.08521	0.66548	0.0454663	PH_hs_0031237	Homo sapiens chemokine (C-C motif)	1	1234	"NM_001100168,NM_000579"	"NP_001093638.1,NP_000570.1"	ENSG00000160791	"ENST00000292303,ENST00000445772"	"ENSP00000292303,ENSP00000404881"
CCR6	0.449362	0.582818	0.713848	0.197804	1.54956	0.0298264	PH_hs_0061088	Homo sapiens chemokine (C-C motif)	1	1235	"NM_004367,NM_031409"	"NP_004358.2,NP_113597.2"	ENSG00000112486	"ENST00000341935,ENST00000349984,ENST00000400926"	"ENSP00000343952,ENSP00000339393,ENSP00000383715"
CCSER1	-0.129429	0.723768	-0.179071	0.589104	-0.506307	0.0191945	PH_hs_0046408	Homo sapiens coiled-coil serine-rich protein 1 (CCSER1)	1	401145	NM_001145065	NP_001138537.1	ENSG00000184305	"ENST00000509176,ENST00000432775,ENST00000505073,ENST00000509109,ENST00000508550,ENST00000514352,ENST00000508086,ENST00000502478,ENST00000513522,ENST00000504150,ENST00000503421,ENST00000510519,ENST00000515693"	"ENSP00000425040,ENSP00000389283,ENSP00000420964,ENSP00000421693,ENSP00000426310,ENSP00000427172,ENSP00000424033,ENSP00000421678,ENSP00000424376"
CD14	0.134124	0.807261	0.726404	0.0189473	0.412544	0.385666	PH_hs_0004352	Homo sapiens CD14 molecule (CD14)	1	929	"NM_001174105,NM_001174104,NM_001040021,NM_000591"	"NP_001167576.1,NP_001167575.1,NP_001035110.1,NP_000582.1"	ENSG00000170458	"ENST00000302014,ENST00000498971,ENST00000519715,ENST00000512545,ENST00000401743"	"ENSP00000304236,ENSP00000426543,ENSP00000430884,ENSP00000425447,ENSP00000385519"
CD160	0.0604357	0.614864	-0.712615	0.00787449	-0.381227	0.310742	PH_hs_0004672	Homo sapiens CD160 molecule (CD160)	1	11126	NM_007053	NP_008984.1	ENSG00000117281	"ENST00000616463,ENST00000369288,ENST00000401557,ENST00000584442,ENST00000235933"	"ENSP00000483935,ENSP00000358294,ENSP00000385199,ENSP00000462594,ENSP00000235933"
CD180	-0.387882	0.123874	-0.651453	0.00676834	0.0164314	0.891801	PH_hs_0004900	Homo sapiens CD180 molecule (CD180)	1	4064	NM_005582	NP_005573.2	ENSG00000134061	"ENST00000256447,ENST00000515027"	ENSP00000256447
CD19	-0.0251806	0.939268	-0.503906	0.252357	-1.07118	0.0321953	PH_hs_0005224	Homo sapiens CD19 molecule (CD19)	1	930	"NM_001178098,NM_001770"	"NP_001171569.1,NP_001761.3"	ENSG00000177455	"ENST00000324662,ENST00000565089,ENST00000567541,ENST00000566890,ENST00000567368,ENST00000538922,ENST00000611258"	"ENSP00000313419,ENSP00000456201,ENSP00000437940,ENSP00000481090"
CD1C	0.201354	0.673654	0.502959	0.0490928	0.566593	0.0187391	PH_hs_0000177	Homo sapiens CD1c molecule (CD1C)	1	911	NM_001765	NP_001756.2	ENSG00000158481	"ENST00000368170,ENST00000443761"	"ENSP00000357152,ENSP00000408755"
CD1C	0.201354	0.673654	0.502959	0.0490928	0.566593	0.0187391	PH_hs_0000177	Homo sapiens CD1c molecule (CD1C)	1	911	NM_001765	NP_001756.2	ENSG00000158481	"ENST00000368170,ENST00000443761"	"ENSP00000357152,ENSP00000408755"
CD200	-0.00334989	0.996704	-0.0190979	0.932515	0.939588	0.00966781	PH_hs_0031349	Homo sapiens CD200 molecule (CD200)	1	4345	"NM_001004196,NM_005944"	"NP_001004196.2,NP_005935.4"	ENSG00000091972	"ENST00000607597,ENST00000606471,ENST00000607516,ENST00000498096,ENST00000473539,ENST00000315711,ENST00000383681,ENST00000478595"	"ENSP00000476114,ENSP00000475860,ENSP00000418576,ENSP00000420298,ENSP00000312766,ENSP00000373179,ENSP00000419816"
CD200R1L	-0.213556	0.67328	-1.67781	0.00130594	-1.67781	0.00127314	PH_hs_0043440	Homo sapiens CD200 receptor 1-like (CD200R1L)	1	344807	"NM_001199215,NM_001008784"	"NP_001186144.1,NP_001008784.2"	ENSG00000206531	"ENST00000398214,ENST00000488794,ENST00000486723,ENST00000448932,ENST00000617549"	"ENSP00000381272,ENSP00000418413,ENSP00000420461,ENSP00000415132,ENSP00000477541"
CD200R1L	-0.213556	0.67328	-1.67781	0.00130594	-1.67781	0.00127314	PH_hs_0043440	Homo sapiens CD200 receptor 1-like (CD200R1L)	1	344807	"NM_001199215,NM_001008784"	"NP_001186144.1,NP_001008784.2"	ENSG00000206531	"ENST00000398214,ENST00000488794,ENST00000486723,ENST00000448932,ENST00000617549"	"ENSP00000381272,ENSP00000418413,ENSP00000420461,ENSP00000415132,ENSP00000477541"
CD300C	0.410421	0.0117891	-0.135528	0.678168	-0.184511	0.0954457	PH_hs_0035320	Homo sapiens CD300c molecule (CD300C)	1	10871	NM_006678	NP_006669.1	ENSG00000167850	ENST00000330793	ENSP00000329507
CD36	0.824926	0.0283403	-0.129444	0.726887	-0.280538	0.202985	PH_hs_0044704	Homo sapiens CD36 molecule (thrombospondin receptor)	1	948	"NM_001127444,NM_001127443,NM_000072,NM_001001547"	"NP_001120916.1,NP_001120915.1,NP_000063.2,NP_001001547.1"	ENSG00000135218	"ENST00000435819,ENST00000480599,ENST00000309881,ENST00000534394,ENST00000526804,ENST00000478292,ENST00000438020,ENST00000436384,ENST00000428497,ENST00000441109,ENST00000482059,ENST00000394788,ENST00000447544,ENST00000426978,ENST00000413265,ENST00000419819,ENST00000441034,ENST00000464213,ENST00000488048,ENST00000433696,ENST00000432207,ENST00000538969,ENST00000544133"	"ENSP00000399421,ENSP00000308165,ENSP00000431296,ENSP00000410371,ENSP00000398760,ENSP00000409762,ENSP00000433659,ENSP00000378268,ENSP00000415743,ENSP00000416388,ENSP00000407690,ENSP00000392298,ENSP00000396258,ENSP00000435698,ENSP00000401863,ENSP00000411411,ENSP00000439543,ENSP00000441956"
CD36	0.508217	0.00978769	0.539883	0.0249956	0.493802	0.00959534	PH_hs_0048997	Homo sapiens CD36 molecule (thrombospondin receptor)	1	948	NM_001001548	NP_001001548.1	ENSG00000135218	"ENST00000435819,ENST00000480599,ENST00000309881,ENST00000534394,ENST00000526804,ENST00000478292,ENST00000438020,ENST00000436384,ENST00000428497,ENST00000441109,ENST00000482059,ENST00000394788,ENST00000447544,ENST00000426978,ENST00000413265,ENST00000419819,ENST00000441034,ENST00000464213,ENST00000488048,ENST00000433696,ENST00000432207,ENST00000538969,ENST00000544133"	"ENSP00000399421,ENSP00000308165,ENSP00000431296,ENSP00000410371,ENSP00000398760,ENSP00000409762,ENSP00000433659,ENSP00000378268,ENSP00000415743,ENSP00000416388,ENSP00000407690,ENSP00000392298,ENSP00000396258,ENSP00000435698,ENSP00000401863,ENSP00000411411,ENSP00000439543,ENSP00000441956"
CD36	0.508217	0.00978769	0.539883	0.0249956	0.493802	0.00959534	PH_hs_0048997	Homo sapiens CD36 molecule (thrombospondin receptor)	1	948	NM_001001548	NP_001001548.1	ENSG00000135218	"ENST00000435819,ENST00000480599,ENST00000309881,ENST00000534394,ENST00000526804,ENST00000478292,ENST00000438020,ENST00000436384,ENST00000428497,ENST00000441109,ENST00000482059,ENST00000394788,ENST00000447544,ENST00000426978,ENST00000413265,ENST00000419819,ENST00000441034,ENST00000464213,ENST00000488048,ENST00000433696,ENST00000432207,ENST00000538969,ENST00000544133"	"ENSP00000399421,ENSP00000308165,ENSP00000431296,ENSP00000410371,ENSP00000398760,ENSP00000409762,ENSP00000433659,ENSP00000378268,ENSP00000415743,ENSP00000416388,ENSP00000407690,ENSP00000392298,ENSP00000396258,ENSP00000435698,ENSP00000401863,ENSP00000411411,ENSP00000439543,ENSP00000441956"
CD36	0.508217	0.00978769	0.539883	0.0249956	0.493802	0.00959534	PH_hs_0048997	Homo sapiens CD36 molecule (thrombospondin receptor)	1	948	NM_001001548	NP_001001548.1	ENSG00000135218	"ENST00000435819,ENST00000480599,ENST00000309881,ENST00000534394,ENST00000526804,ENST00000478292,ENST00000438020,ENST00000436384,ENST00000428497,ENST00000441109,ENST00000482059,ENST00000394788,ENST00000447544,ENST00000426978,ENST00000413265,ENST00000419819,ENST00000441034,ENST00000464213,ENST00000488048,ENST00000433696,ENST00000432207,ENST00000538969,ENST00000544133"	"ENSP00000399421,ENSP00000308165,ENSP00000431296,ENSP00000410371,ENSP00000398760,ENSP00000409762,ENSP00000433659,ENSP00000378268,ENSP00000415743,ENSP00000416388,ENSP00000407690,ENSP00000392298,ENSP00000396258,ENSP00000435698,ENSP00000401863,ENSP00000411411,ENSP00000439543,ENSP00000441956"
CD38	-0.0730849	0.497003	-0.136208	0.348184	0.397055	0.0136351	PH_hs_0022850	Homo sapiens CD38 molecule (CD38)	1	952	NM_001775	NP_001766.2	ENSG00000004468	"ENST00000502843,ENST00000226279,ENST00000506191,ENST00000511430,ENST00000510674"	"ENSP00000427277,ENSP00000226279,ENSP00000423047"
CD3EAP	-0.270975	0.067807	-0.260335	0.380305	-0.371903	0.0266176	PH_hs_0028490	"Homo sapiens CD3e molecule, epsilon associated protein (CD3EAP)"	1	10849	NM_012099	NP_036231.1	ENSG00000117877	"ENST00000309424,ENST00000592852,ENST00000589804,ENST00000590794"	"ENSP00000310966,ENSP00000467771,ENSP00000465099,ENSP00000466503"
CD53	0.572019	0.0375591	-0.0396759	0.795134	-0.399377	0.0526615	PH_hs_0025876	Homo sapiens CD53 molecule (CD53)	1	963	"NM_001040033,NM_000560"	"NP_001035122.1,NP_000551.1"	ENSG00000143119	"ENST00000271324,ENST00000471220,ENST00000476408,ENST00000497404,ENST00000464329"	ENSP00000271324
CD53	0.572019	0.0375591	-0.0396759	0.795134	-0.399377	0.0526615	PH_hs_0025876	Homo sapiens CD53 molecule (CD53)	1	963	"NM_001040033,NM_000560"	"NP_001035122.1,NP_000551.1"	ENSG00000143119	"ENST00000271324,ENST00000471220,ENST00000476408,ENST00000497404,ENST00000464329"	ENSP00000271324
CD63	-0.0377118	0.832104	-0.250274	0.0428133	-0.136715	0.110882	PH_hs_0026052	Homo sapiens CD63 molecule (CD63)	1	967	"NM_001267698,NM_001257401,NM_001257400,NM_001257392,NM_001257391,NM_001257390,NM_001257389,NM_001780"	"NP_001254627.1,NP_001244330.1,NP_001244329.1,NP_001244321.1,NP_001244320.1,NP_001244319.1,NP_001244318.1,NP_001771.1"	ENSG00000135404	"ENST00000548898,ENST00000548117,ENST00000552067,ENST00000548160,ENST00000546939,ENST00000552692,ENST00000549117,ENST00000257857,ENST00000550050,ENST00000552754,ENST00000550776,ENST00000555199,ENST00000552164,ENST00000551173,ENST00000546457,ENST00000420846"	"ENSP00000447938,ENSP00000449684,ENSP00000449654,ENSP00000447356,ENSP00000449337,ENSP00000447730,ENSP00000257857,ENSP00000449435,ENSP00000446807,ENSP00000448091,ENSP00000449281,ENSP00000446752,ENSP00000450191,ENSP00000393502"
CD72	-0.12682	0.411109	-0.268998	0.153074	0.543798	0.00503622	PH_hs_0063448	Homo sapiens CD72 molecule (CD72)	1	971	NM_001782	NP_001773.1	ENSG00000137101	"ENST00000396757,ENST00000490239,ENST00000463720,ENST00000477364,ENST00000378431,ENST00000470387,ENST00000465754,ENST00000482121,ENST00000378430,ENST00000259633,ENST00000612238"	"ENSP00000379980,ENSP00000367688,ENSP00000367687,ENSP00000259633,ENSP00000483742"
CD74	-0.403219	0.204353	-0.345864	0.0107928	-0.13166	0.265452	PH_hs_0044580	"Homo sapiens CD74 molecule, major histocompatibility complex, class II invariant chain (CD74)"	1	972	"NM_001025158,NM_001025159,NM_004355"	"NP_001020329.1,NP_001020330.1,NP_004346.1"	ENSG00000019582	"ENST00000377795,ENST00000353334,ENST00000518797,ENST00000524315,ENST00000009530,ENST00000523208,ENST00000517752,ENST00000522246,ENST00000523813,ENST00000523836,ENST00000517791,ENST00000522153"	"ENSP00000367026,ENSP00000230685,ENSP00000430614,ENSP00000429024,ENSP00000009530,ENSP00000430654,ENSP00000429641,ENSP00000429478"
CD74	0.232327	0.254723	-0.275865	0.339206	-0.372386	0.0145519	PH_hs_0027479	"Homo sapiens CD74 molecule, major histocompatibility complex, class II invariant chain (CD74)"	1	972	"NM_001025159,NM_004355"	"NP_001020330.1,NP_004346.1"	ENSG00000019582	"ENST00000377795,ENST00000353334,ENST00000518797,ENST00000524315,ENST00000009530,ENST00000523208,ENST00000517752,ENST00000522246,ENST00000523813,ENST00000523836,ENST00000517791,ENST00000522153"	"ENSP00000367026,ENSP00000230685,ENSP00000430614,ENSP00000429024,ENSP00000009530,ENSP00000430654,ENSP00000429641,ENSP00000429478"
CD8B	0.481377	0.455163	-0.891668	0.00324754	-0.96083	0.00415083	PH_hs_0030044	Homo sapiens CD8b molecule (CD8B)	1	926	NM_004931	NP_004922.1	ENSG00000172116	"ENST00000393759,ENST00000349455,ENST00000331469,ENST00000390655,ENST00000393761,ENST00000431506"	"ENSP00000377356,ENSP00000340592,ENSP00000331172,ENSP00000375070,ENSP00000377358,ENSP00000394806"
CD8B	0.481377	0.455163	-0.891668	0.00324754	-0.96083	0.00415083	PH_hs_0030044	Homo sapiens CD8b molecule (CD8B)	1	926	NM_004931	NP_004922.1	ENSG00000172116	"ENST00000393759,ENST00000349455,ENST00000331469,ENST00000390655,ENST00000393761,ENST00000431506"	"ENSP00000377356,ENSP00000340592,ENSP00000331172,ENSP00000375070,ENSP00000377358,ENSP00000394806"
CDC25C	0.384153	0.157908	-0.0705388	0.834798	-0.400434	0.0505241	PH_hs_0063627	Homo sapiens cell division cycle 25C (CDC25C)	1	995	"NM_001790,NM_022809"	"NP_001781.2,NP_073720.1"	ENSG00000158402	"ENST00000323760,ENST00000415130,ENST00000513970,ENST00000514555,ENST00000514017,ENST00000503022,ENST00000510119,ENST00000504831,ENST00000348983"	"ENSP00000321656,ENSP00000392631,ENSP00000424795,ENSP00000425470,ENSP00000423525,ENSP00000427251,ENSP00000427105,ENSP00000345205"
CDC42	0.419705	0.0740737	0.623726	0.158884	0.837636	0.023686	PH_hs_0045692	Homo sapiens cell division cycle 42 (CDC42)	1	998	NM_044472	NP_426359.1	ENSG00000070831	"ENST00000344548,ENST00000315554,ENST00000498236,ENST00000411827,ENST00000400259"	"ENSP00000341072,ENSP00000314458,ENSP00000398327,ENSP00000383118"
CDC42EP1	-1.1562	0.0442913	-0.310432	0.578551	-0.267542	0.621041	PH_hs_0008886	Homo sapiens CDC42 effector protein (Rho GTPase binding)	1	11135	NM_152243	NP_689449.1	ENSG00000128283	"ENST00000249014,ENST00000430687,ENST00000415670,ENST00000434728"	"ENSP00000249014,ENSP00000411682,ENSP00000405006,ENSP00000403710"
CDC42EP4	0.243713	0.282761	-0.571537	0.0657292	-0.535157	0.0459464	PH_hs_0030903	Homo sapiens CDC42 effector protein (Rho GTPase binding)	1	23580	NM_012121	NP_036253.2	ENSG00000179604	"ENST00000335793,ENST00000439510,ENST00000581014,ENST00000580315,ENST00000579611,ENST00000581045,ENST00000582303,ENST00000578516,ENST00000630622"	"ENSP00000338258,ENSP00000404270,ENSP00000464104,ENSP00000462231,ENSP00000463877,ENSP00000485861"
CDC45	-0.0784509	0.326521	-0.0155704	0.934199	-0.173729	0.0537679	PH_hs_0006287	Homo sapiens cell division cycle 45 (CDC45)	1	8318	"NM_001178010,NM_001178011,NM_003504"	"NP_001171481.1,NP_001171482.1,NP_003495.1"	ENSG00000093009	"ENST00000407835,ENST00000438587,ENST00000455750,ENST00000491520,ENST00000483431,ENST00000404724,ENST00000487669,ENST00000428937,ENST00000471470,ENST00000493724,ENST00000263201,ENST00000437685"	"ENSP00000385240,ENSP00000397434,ENSP00000413138,ENSP00000384978,ENSP00000388280,ENSP00000263201,ENSP00000405726"
CDC73	-0.292369	0.151071	-0.329932	0.0186894	-0.0656225	0.824193	PH_hs_0049184	Homo sapiens cell division cycle 73 (CDC73)	1	79577	NM_024529	NP_078805.3	ENSG00000134371	"ENST00000367435,ENST00000482484,ENST00000477868"	ENSP00000356405
CDH15	-0.169557	0.386482	-0.220423	0.333806	-0.81739	0.0515804	PH_hs_0008885	"Homo sapiens cadherin 15, type 1, M-cadherin (myotubule)"	1	1013	NM_004933	NP_004924.1	ENSG00000129910	"ENST00000521087,ENST00000524089,ENST00000289746"	ENSP00000289746
CDH19	0.351866	0.0903872	0.696675	0.0139552	0.773416	0.00902124	PH_hs_0060594	"Homo sapiens cadherin 19, type 2 (CDH19)"	1	28513	"NM_001271028,NM_021153,NR_073130"	"NP_001257957.1,NP_066976.1,-"	ENSG00000071991	"ENST00000262150,ENST00000579658,ENST00000540086,ENST00000454642,ENST00000580157"	"ENSP00000262150,ENSP00000463085,ENSP00000439593,ENSP00000401998,ENSP00000464477"
CDH19	0.351866	0.0903872	0.696675	0.0139552	0.773416	0.00902124	PH_hs_0060594	"Homo sapiens cadherin 19, type 2 (CDH19)"	1	28513	"NM_001271028,NM_021153,NR_073130"	"NP_001257957.1,NP_066976.1,-"	ENSG00000071991	"ENST00000262150,ENST00000579658,ENST00000540086,ENST00000454642,ENST00000580157"	"ENSP00000262150,ENSP00000463085,ENSP00000439593,ENSP00000401998,ENSP00000464477"
CDH20	-0.310828	0.597782	-1.57987	0.023117	-1.12719	0.136473	PH_hs_0015610	"Homo sapiens cadherin 20, type 2 (CDH20)"	1	28316	NM_031891	NP_114097.2	ENSG00000101542	"ENST00000262717,ENST00000538374,ENST00000587582,ENST00000536675"	"ENSP00000262717,ENSP00000442226,ENSP00000444767"
CDH23	-0.124908	0.572353	-0.327586	0.0491003	0.024159	0.943326	PH_hs_0062151	Homo sapiens cadherin-related 23 (CDH23)	1	64072	NM_001171931	NP_001165402.1	ENSG00000107736	"ENST00000224721,ENST00000461841,ENST00000299366,ENST00000616684,ENST00000466757,ENST00000470494,ENST00000442677,ENST00000398792,ENST00000475158,ENST00000619887,ENST00000398788,ENST00000398842,ENST00000622827,ENST00000398809"	"ENSP00000224721,ENSP00000473454,ENSP00000299366,ENSP00000482036,ENSP00000473539,ENSP00000480146,ENSP00000388894,ENSP00000478374,ENSP00000381768,ENSP00000381822,ENSP00000483211,ENSP00000381789"
CDH24	0.396019	0.592649	0.941829	0.0426815	0.638813	0.38432	PH_hs_0047891	"Homo sapiens cadherin 24, type 2 (CDH24)"	1	64403	"NM_144985,NM_022478"	"NP_659422.2,NP_071923.2"	ENSG00000139880	"ENST00000485922,ENST00000554034,ENST00000267383,ENST00000487137,ENST00000397359,ENST00000610348"	"ENSP00000452493,ENSP00000267383,ENSP00000434821,ENSP00000380517,ENSP00000478078"
CDH5	-0.044969	0.932962	0.23483	0.134709	0.628054	0.0215945	PH_hs_0004397	"Homo sapiens cadherin 5, type 2 (vascular endothelium)"	1	1003	NM_001795	NP_001786.2	ENSG00000179776	"ENST00000341529,ENST00000565334,ENST00000562048,ENST00000568155,ENST00000568023,ENST00000563425,ENST00000539168,ENST00000614547"	"ENSP00000344115,ENSP00000456028,ENSP00000455302,ENSP00000456093,ENSP00000455655,ENSP00000458878,ENSP00000461880,ENSP00000479381"
CDH8	0.353491	0.199456	0.709124	0.0859019	0.782926	0.044035	PH_hs_0061046	"Homo sapiens cadherin 8, type 2 (CDH8)"	1	1006	NM_001796	NP_001787.2	ENSG00000150394	"ENST00000577730,ENST00000585315,ENST00000577390,ENST00000299345,ENST00000583483,ENST00000580044,ENST00000577536,ENST00000584337,ENST00000582242,ENST00000583382,ENST00000584966,ENST00000577228,ENST00000584506,ENST00000582980"	"ENSP00000462018,ENSP00000463266,ENSP00000462701,ENSP00000299345,ENSP00000463511,ENSP00000462976,ENSP00000462847"
CDHR3	-0.0825352	0.908785	0.0335771	0.910006	0.431534	0.00887457	PH_hs_0024070	Homo sapiens cadherin-related family member 3 (CDHR3)	1	222256	NM_152750	NP_689963.2	ENSG00000128536	"ENST00000487084,ENST00000474330,ENST00000470188,ENST00000488386,ENST00000472116,ENST00000317716,ENST00000478080,ENST00000461766,ENST00000496633,ENST00000466045,ENST00000471910,ENST00000466351,ENST00000468477,ENST00000468143"	"ENSP00000419593,ENSP00000325954,ENSP00000417771,ENSP00000417198,ENSP00000419017,ENSP00000418958"
CDIPT-AS1	-0.14186	0.203475	0.132105	0.519473	0.270963	0.0440684	PH_hs_0033676	Homo sapiens CDIPT antisense RNA 1 (head to head)	1	440356	"NR_024370,NR_015396"	"-,-"	ENSG00000214725	"ENST00000565014,ENST00000398859"
CDK11A|CDK11B	0.109193	0.547872	0.46944	0.0347528	0.632038	0.0454805	PH_hs_0032090	Homo sapiens cyclin-dependent kinase 11A (CDK11A)|Homo sapiens cyclin-dependent kinase 11B (CDK11B)	4	728642|984	"NM_033529,NM_024011|NM_033489,NM_033487,NM_033486"	"NP_277071.2,NP_076916.2|NP_277024.2,NP_277022.1,NP_277021.2"	ENSG00000008128|ENSG00000248333	"ENST00000356200,ENST00000463652,ENST00000356937,ENST00000378638,ENST00000509982,ENST00000404249,ENST00000460465,ENST00000357760,ENST00000358779,ENST00000378633,ENST00000478901,ENST00000468397,ENST00000491311,ENST00000495016,ENST00000468800,ENST00000464748,ENST00000489300,ENST00000492390,ENST00000474916,ENST00000479362,ENST00000498810,ENST00000487462,ENST00000401096|ENST00000341832,ENST0000040724…	"ENSP00000348529,ENSP00000367905,ENSP00000422149,ENSP00000384442,ENSP00000462289,ENSP00000350403,ENSP00000351629,ENSP00000367900,ENSP00000423900,ENSP00000383874|ENSP00000463048,ENSP00000464036,ENSP00000481846,ENSP00000464016,ENSP00000484222,ENSP00000485937,ENSP00000485705,ENSP00000485849,ENSP00000463200"
CDK11A|CDK11B	0.109193	0.547872	0.46944	0.0347528	0.632038	0.0454805	PH_hs_0032090	Homo sapiens cyclin-dependent kinase 11A (CDK11A)|Homo sapiens cyclin-dependent kinase 11B (CDK11B)	4	728642|984	"NM_033529,NM_024011|NM_033489,NM_033487,NM_033486"	"NP_277071.2,NP_076916.2|NP_277024.2,NP_277022.1,NP_277021.2"	ENSG00000008128|ENSG00000248333	"ENST00000356200,ENST00000463652,ENST00000356937,ENST00000378638,ENST00000509982,ENST00000404249,ENST00000460465,ENST00000357760,ENST00000358779,ENST00000378633,ENST00000478901,ENST00000468397,ENST00000491311,ENST00000495016,ENST00000468800,ENST00000464748,ENST00000489300,ENST00000492390,ENST00000474916,ENST00000479362,ENST00000498810,ENST00000487462,ENST00000401096|ENST00000341832,ENST0000040724…	"ENSP00000348529,ENSP00000367905,ENSP00000422149,ENSP00000384442,ENSP00000462289,ENSP00000350403,ENSP00000351629,ENSP00000367900,ENSP00000423900,ENSP00000383874|ENSP00000463048,ENSP00000464036,ENSP00000481846,ENSP00000464016,ENSP00000484222,ENSP00000485937,ENSP00000485705,ENSP00000485849,ENSP00000463200"
CDK5R2	0.232364	0.334369	0.92966	0.0112851	0.799838	0.0297855	PH_hs_0009610	"Homo sapiens cyclin-dependent kinase 5, regulatory subunit 2 (p39)"	1	8941	NM_003936	NP_003927.1	ENSG00000171450	ENST00000302625	ENSP00000304250
CDK5R2	0.232364	0.334369	0.92966	0.0112851	0.799838	0.0297855	PH_hs_0009610	"Homo sapiens cyclin-dependent kinase 5, regulatory subunit 2 (p39)"	1	8941	NM_003936	NP_003927.1	ENSG00000171450	ENST00000302625	ENSP00000304250
CDKL1	-0.0563721	0.683648	-0.171259	0.366239	0.263071	0.040484	PH_hs_0043141	Homo sapiens cyclin-dependent kinase-like 1 (CDC2-related kinase)	1	8814	NM_004196	NP_004187.2	ENSG00000100490	"ENST00000395834,ENST00000525911,ENST00000534267,ENST00000216378,ENST00000356146,ENST00000542671,ENST00000529347,ENST00000528197,ENST00000531052,ENST00000530553,ENST00000534566"	"ENSP00000379176,ENSP00000431449,ENSP00000435044,ENSP00000216378"
CDKN1A	-0.0363041	0.856021	-0.314042	0.116611	-0.484007	0.0386058	PH_hs_0024155	"Homo sapiens cyclin-dependent kinase inhibitor 1A (p21, Cip1)"	1	1026	"NM_078467,NM_000389,NM_001220778,NM_001220777"	"NP_510867.1,NP_000380.1,NP_001207707.1,NP_001207706.1"	ENSG00000124762	"ENST00000459970,ENST00000244741,ENST00000373711,ENST00000478800,ENST00000462537,ENST00000405375,ENST00000615513,ENST00000448526"	"ENSP00000244741,ENSP00000362815,ENSP00000384849,ENSP00000482768,ENSP00000409259"
CDON	0.427153	0.12635	0.688887	0.0197634	0.557444	0.0622462	PH_hs_0002973	"Homo sapiens cell adhesion associated, oncogene regulated (CDON)"	1	50937	NM_001243597	NP_001230526.1	ENSG00000064309	"ENST00000392693,ENST00000531738,ENST00000263577,ENST00000534661,ENST00000531830,ENST00000525625,ENST00000531586,ENST00000527967,ENST00000534818"	"ENSP00000376458,ENSP00000432901,ENSP00000263577,ENSP00000436755,ENSP00000432571,ENSP00000434212,ENSP00000436940,ENSP00000437176"
CDRT15|CDRT15P1|CDRT15L2|CDRT15P2	0.0264755	0.791684	0.435724	0.0109633	0.0975734	0.690569	PH_hs_0049503	Homo sapiens CMT1A duplicated region transcript 15 (CDRT15)|Homo sapiens CMT1A duplicated region transcript 15 pseudogene 1 (CDRT15P1)|Homo sapiens CMT1A duplicated region transcript 15-like 2 (CDRT15L2)|Homo sapiens CMT1A duplicated region transcript 15 pseudogene 2 (CDRT15P2)	4	146822|94158|256223|644694	NM_001007530|NR_003261|NM_001190790|NR_033865	NP_001007531.1|-|NP_001177719.1|-	ENSG00000223510|ENSG00000214819	"ENST00000420162,ENST00000431716|ENST00000399044"	"ENSP00000402355,ENSP00000399575|ENSP00000382000"
CDRT15L2	-0.0243226	0.955437	-0.419783	0.102833	-0.732201	0.00840371	PH_hs_0061439	Homo sapiens CMT1A duplicated region transcript 15-like 2 (CDRT15L2)	1	256223	NM_001190790	NP_001177719.1	ENSG00000214819	ENST00000399044	ENSP00000382000
CDRT15L2	0.232529	0.0732205	0.396452	0.174133	0.350591	0.0439626	PH_hs_0031730	Homo sapiens CMT1A duplicated region transcript 15-like 2 (CDRT15L2)	1	256223	NM_001190790	NP_001177719.1	ENSG00000214819	ENST00000399044	ENSP00000382000
CDS2	0.692617	0.579529	-1.79281	0.0153187	-0.692755	0.594547	PH_hs_0060817	Homo sapiens CDP-diacylglycerol synthase (phosphatidate cytidylyltransferase)	1	8760	NM_003818	NP_003809.1	ENSG00000101290	"ENST00000460006,ENST00000467923,ENST00000450570,ENST00000468817,ENST00000486875,ENST00000379070"	"ENSP00000419879,ENSP00000403205"
CDX1	0.724579	0.0495484	0.095518	0.696936	-0.404678	0.117464	PH_hs_0027033	Homo sapiens caudal type homeobox 1 (CDX1)	1	1044	NM_001804	NP_001795.2	ENSG00000113722	"ENST00000231656,ENST00000616154"	"ENSP00000231656,ENSP00000477928"
CECR6	-0.172952	0.588899	-0.561209	0.256097	-1.25821	0.0540212	PH_hs_0032177	"Homo sapiens cat eye syndrome chromosome region, candidate 6 (CECR6)"	1	27439	"NM_001163079,NM_031890"	"NP_001156551.1,NP_114096.1"	ENSG00000183307	"ENST00000399875,ENST00000331437"	"ENSP00000382764,ENSP00000329318"
CEL|CELP	-0.352105	0.350259	-0.499376	0.406106	-0.987576	0.0534796	PH_hs_0061236	Homo sapiens carboxyl ester lipase (CEL)|Homo sapiens carboxyl ester lipase pseudogene (CELP)	4	1056|1057	NM_001807|NR_001275	NP_001798.2|-	ENSG00000170835	"ENST00000372080,ENST00000621209"	"ENSP00000361151,ENSP00000480238"
CELA2A	-0.514619	0.386799	-0.956219	0.33261	-0.966462	0.0407514	PH_hs_0030845	"Homo sapiens chymotrypsin-like elastase family, member 2A (CELA2A)"	1	63036	NM_033440	NP_254275.1	ENSG00000142615	"ENST00000459653,ENST00000359621,ENST00000497590"	ENSP00000352639
CELA3B	-1.14044	0.0136531	-0.531244	0.455197	-0.939256	0.0615737	PH_hs_0032032	"Homo sapiens chymotrypsin-like elastase family, member 3B (CELA3B)"	1	23436	NM_007352	NP_031378.1	ENSG00000219073	"ENST00000337107,ENST00000374666,ENST00000400277,ENST00000473526"	"ENSP00000338369,ENSP00000363798,ENSP00000383135"
CELA3B	0.388746	0.017917	0.334929	0.08205	0.537791	0.0483458	PH_hs_0045650	"Homo sapiens chymotrypsin-like elastase family, member 3B (CELA3B)"	1	23436	NM_007352	NP_031378.1	ENSG00000219073	"ENST00000337107,ENST00000374666,ENST00000400277,ENST00000473526"	"ENSP00000338369,ENSP00000363798,ENSP00000383135"
CELA3B	0.388746	0.017917	0.334929	0.08205	0.537791	0.0483458	PH_hs_0045650	"Homo sapiens chymotrypsin-like elastase family, member 3B (CELA3B)"	1	23436	NM_007352	NP_031378.1	ENSG00000219073	"ENST00000337107,ENST00000374666,ENST00000400277,ENST00000473526"	"ENSP00000338369,ENSP00000363798,ENSP00000383135"
CELF2	-0.191074	0.248579	-0.233619	0.0444225	-0.159912	0.448698	PH_hs_0049151	"Homo sapiens CUGBP, Elav-like family member 2 (CELF2)"	1	10659	"NM_001083591,NM_001025076,NM_006561,NM_001025077"	"NP_001077060.1,NP_001020247.1,NP_006552.3,NP_001020248.1"	ENSG00000048740	"ENST00000416382,ENST00000631460,ENST00000633200,ENST00000631816,ENST00000633077,ENST00000632065,ENST00000632728,ENST00000399850,ENST00000417956,ENST00000608830,ENST00000609870,ENST00000609692,ENST00000354897,ENST00000542579"	"ENSP00000406451,ENSP00000488582,ENSP00000488438,ENSP00000488268,ENSP00000488690,ENSP00000488422,ENSP00000487802,ENSP00000382743,ENSP00000404834,ENSP00000476999,ENSP00000476392,ENSP00000476656,ENSP00000346971,ENSP00000443926"
CELF4	-0.323217	0.62758	-1.39183	0.0230496	-0.618281	0.554386	PH_hs_0025457	"Homo sapiens CUGBP, Elav-like family member 4 (CELF4)"	1	56853	"NM_001025089,NM_001025088,NM_001025087,NM_020180"	"NP_001020260.1,NP_001020259.1,NP_001020258.1,NP_064565.1"	ENSG00000101489	"ENST00000586009,ENST00000588591,ENST00000334919,ENST00000591287,ENST00000590112,ENST00000590011,ENST00000601019,ENST00000361795,ENST00000603232,ENST00000587911,ENST00000591282,ENST00000593271,ENST00000589386,ENST00000588597,ENST00000587657,ENST00000591421,ENST00000587074,ENST00000601392,ENST00000587819,ENST00000589229,ENST00000587924,ENST00000587449,ENST00000420428"	"ENSP00000465348,ENSP00000468256,ENSP00000335631,ENSP00000464917,ENSP00000468428,ENSP00000469627,ENSP00000355089,ENSP00000474788,ENSP00000471616,ENSP00000464794,ENSP00000464996,ENSP00000465125,ENSP00000468109,ENSP00000467056,ENSP00000470649,ENSP00000467732,ENSP00000465211,ENSP00000467571,ENSP00000410584"
CELF4	0.0876459	0.57943	0.834109	0.0150472	0.913227	0.024815	PH_hs_0049144	"Homo sapiens CUGBP, Elav-like family member 4 (CELF4)"	1	56853	"NM_001025089,NM_001025088,NM_001025087,NM_020180"	"NP_001020260.1,NP_001020259.1,NP_001020258.1,NP_064565.1"	ENSG00000101489	"ENST00000586009,ENST00000588591,ENST00000334919,ENST00000591287,ENST00000590112,ENST00000590011,ENST00000601019,ENST00000361795,ENST00000603232,ENST00000587911,ENST00000591282,ENST00000593271,ENST00000589386,ENST00000588597,ENST00000587657,ENST00000591421,ENST00000587074,ENST00000601392,ENST00000587819,ENST00000589229,ENST00000587924,ENST00000587449,ENST00000420428"	"ENSP00000465348,ENSP00000468256,ENSP00000335631,ENSP00000464917,ENSP00000468428,ENSP00000469627,ENSP00000355089,ENSP00000474788,ENSP00000471616,ENSP00000464794,ENSP00000464996,ENSP00000465125,ENSP00000468109,ENSP00000467056,ENSP00000470649,ENSP00000467732,ENSP00000465211,ENSP00000467571,ENSP00000410584"
CELF4	0.0876459	0.57943	0.834109	0.0150472	0.913227	0.024815	PH_hs_0049144	"Homo sapiens CUGBP, Elav-like family member 4 (CELF4)"	1	56853	"NM_001025089,NM_001025088,NM_001025087,NM_020180"	"NP_001020260.1,NP_001020259.1,NP_001020258.1,NP_064565.1"	ENSG00000101489	"ENST00000586009,ENST00000588591,ENST00000334919,ENST00000591287,ENST00000590112,ENST00000590011,ENST00000601019,ENST00000361795,ENST00000603232,ENST00000587911,ENST00000591282,ENST00000593271,ENST00000589386,ENST00000588597,ENST00000587657,ENST00000591421,ENST00000587074,ENST00000601392,ENST00000587819,ENST00000589229,ENST00000587924,ENST00000587449,ENST00000420428"	"ENSP00000465348,ENSP00000468256,ENSP00000335631,ENSP00000464917,ENSP00000468428,ENSP00000469627,ENSP00000355089,ENSP00000474788,ENSP00000471616,ENSP00000464794,ENSP00000464996,ENSP00000465125,ENSP00000468109,ENSP00000467056,ENSP00000470649,ENSP00000467732,ENSP00000465211,ENSP00000467571,ENSP00000410584"
CEMP1	-0.350945	0.329867	-0.647918	0.05358	-0.860413	0.00339717	PH_hs_0042931	Homo sapiens cementum protein 1 (CEMP1)	1	752014	NM_001048212	NP_001041677.1	ENSG00000205923	"ENST00000567119,ENST00000565480"	"ENSP00000457380,ENSP00000455479"
CEMP1	-0.350945	0.329867	-0.647918	0.05358	-0.860413	0.00339717	PH_hs_0042931	Homo sapiens cementum protein 1 (CEMP1)	1	752014	NM_001048212	NP_001041677.1	ENSG00000205923	"ENST00000567119,ENST00000565480"	"ENSP00000457380,ENSP00000455479"
CENPJ	-0.644875	0.00345523	-0.929318	0.125753	-0.424632	0.33858	PH_hs_0048625	Homo sapiens centromere protein J (CENPJ)	1	55835	"NM_018451,NR_047595,NR_047594"	"NP_060921.3,-,-"	ENSG00000151849	"ENST00000381884,ENST00000471870,ENST00000493190,ENST00000418179,ENST00000616936,ENST00000545981"	"ENSP00000371308,ENSP00000399334,ENSP00000477511,ENSP00000441090"
CENPU	-0.139494	0.487759	-0.237537	0.0374532	-0.220365	0.201324	PH_hs_0048063	Homo sapiens centromere protein U (CENPU)	1	79682	NM_024629	NP_078905.2	ENSG00000151725	"ENST00000281453,ENST00000510146,ENST00000502461,ENST00000508095,ENST00000506535,ENST00000514781"	"ENSP00000281453,ENSP00000423248,ENSP00000423167"
CEP112	0.177467	0.175492	0.459453	0.0308522	0.54027	0.00704522	PH_hs_0026418	Homo sapiens centrosomal protein 112kDa (CEP112)	1	201134	NM_001037325	NP_001032402.1	ENSG00000154240	"ENST00000535342,ENST00000581739,ENST00000583466,ENST00000317442,ENST00000580694,ENST00000581734,ENST00000537949,ENST00000585168,ENST00000582795,ENST00000580482,ENST00000582760,ENST00000582861,ENST00000578878,ENST00000584627,ENST00000584987,ENST00000578971,ENST00000583358,ENST00000580624,ENST00000577322,ENST00000392769"	"ENSP00000442784,ENSP00000464597,ENSP00000320592,ENSP00000462567,ENSP00000440775,ENSP00000463445,ENSP00000463914,ENSP00000464164,ENSP00000376522"
CEP112	0.177467	0.175492	0.459453	0.0308522	0.54027	0.00704522	PH_hs_0026418	Homo sapiens centrosomal protein 112kDa (CEP112)	1	201134	NM_001037325	NP_001032402.1	ENSG00000154240	"ENST00000535342,ENST00000581739,ENST00000583466,ENST00000317442,ENST00000580694,ENST00000581734,ENST00000537949,ENST00000585168,ENST00000582795,ENST00000580482,ENST00000582760,ENST00000582861,ENST00000578878,ENST00000584627,ENST00000584987,ENST00000578971,ENST00000583358,ENST00000580624,ENST00000577322,ENST00000392769"	"ENSP00000442784,ENSP00000464597,ENSP00000320592,ENSP00000462567,ENSP00000440775,ENSP00000463445,ENSP00000463914,ENSP00000464164,ENSP00000376522"
CEP162	-0.254724	0.0345794	-0.22017	0.293317	0.0219247	0.859848	PH_hs_0011894	Homo sapiens centrosomal protein 162kDa (CEP162)	1	22832	NM_014895	NP_055710.2	ENSG00000135315	"ENST00000461137,ENST00000257766,ENST00000403245,ENST00000487999,ENST00000497936,ENST00000435955,ENST00000617909"	"ENSP00000257766,ENSP00000385215,ENSP00000410813,ENSP00000481760"
CEP170B	0.217524	0.268223	0.495853	0.00909173	0.163799	0.657924	PH_hs_0010777	Homo sapiens centrosomal protein 170B (CEP170B)	1	283638	"NM_001112726,NM_015005"	"NP_001106197.1,NP_055820.2"	ENSG00000099814	"ENST00000556508,ENST00000414716,ENST00000251181,ENST00000453495"	"ENSP00000451249,ENSP00000404151,ENSP00000407238"
CEP290	-0.116778	0.219058	-0.22149	0.0453934	0.124371	0.283638	PH_hs_0061305	Homo sapiens centrosomal protein 290kDa (CEP290)	1	80184	NM_025114	NP_079390.3	ENSG00000198707	"ENST00000547691,ENST00000552810,ENST00000604024,ENST00000547926,ENST00000550962,ENST00000552770,ENST00000309041,ENST00000397838"	"ENSP00000446905,ENSP00000448012,ENSP00000473863,ENSP00000448573,ENSP00000447623,ENSP00000447527,ENSP00000308021,ENSP00000380938"
CEP295NL	-0.271384	0.613382	0.271317	0.734403	1.3366	0.0178145	PH_hs_0044997	Homo sapiens CEP295 N-terminal like (CEP295NL)	1	100653515	"NM_001243541,NM_001243540"	"NP_001230470.1,NP_001230469.1"	ENSG00000178404	"ENST00000586713,ENST00000322630,ENST00000590267,ENST00000587052,ENST00000619342"	"ENSP00000465968,ENSP00000312767,ENSP00000483863"
CEP350	-0.161031	0.506691	-0.274707	0.0359059	-0.014687	0.865242	PH_hs_0024925	Homo sapiens centrosomal protein 350kDa (CEP350)	1	9857	NM_014810	NP_055625.4	ENSG00000135837	"ENST00000367607,ENST00000491495,ENST00000357434,ENST00000418229,ENST00000490047,ENST00000429851,ENST00000437245,ENST00000484356,ENST00000490141,ENST00000417046,ENST00000496440"	"ENSP00000356579,ENSP00000435808,ENSP00000350016,ENSP00000407044,ENSP00000432910,ENSP00000412460,ENSP00000409395,ENSP00000401608"
CEP68	0.115918	0.430519	0.168041	0.219619	-0.339668	0.0365062	PH_hs_0008688	Homo sapiens centrosomal protein 68kDa (CEP68)	1	23177	NM_015147	NP_055962.2	ENSG00000011523	"ENST00000475851,ENST00000377990,ENST00000260569,ENST00000497039,ENST00000537589"	"ENSP00000367229,ENSP00000260569,ENSP00000443357"
CERKL	-0.0704073	0.628229	-0.645466	0.0209663	-0.348368	0.252787	PH_hs_0049273	Homo sapiens ceramide kinase-like (CERKL)	1	375298	"NM_001160277,NM_001030313,NM_001030312,NM_001030311,NM_201548,NR_027690,NR_027689"	"NP_001153749.1,NP_001025484.1,NP_001025483.1,NP_001025482.1,NP_963842.1,-,-"	ENSG00000188452	"ENST00000410087,ENST00000409440,ENST00000374969,ENST00000452174,ENST00000339098,ENST00000374970,ENST00000374967,ENST00000494398,ENST00000421817,ENST00000479558,ENST00000466715,ENST00000460319,ENST00000476070,ENST00000497337"	"ENSP00000386725,ENSP00000387080,ENSP00000364108,ENSP00000409198,ENSP00000341159,ENSP00000364109,ENSP00000364106,ENSP00000411466"
CERS3	-0.548682	0.0825461	-0.415816	0.275174	-0.63265	0.0161084	PH_hs_0025042	Homo sapiens ceramide synthase 3 (CERS3)	1	204219	NM_178842	NP_849164.2	ENSG00000154227	"ENST00000284382,ENST00000538112,ENST00000394113,ENST00000560944,ENST00000560348,ENST00000558884,ENST00000559023,ENST00000559639"	"ENSP00000284382,ENSP00000437640,ENSP00000377672,ENSP00000453816,ENSP00000453598"
CES2	0.25897	0.500013	0.446159	0.216516	0.639707	0.0186852	PH_hs_0040662	Homo sapiens carboxylesterase 2 (CES2)	1	8824	"NR_036684,NM_003869,NM_198061"	"-,NP_003860.2,NP_932327.1"	ENSG00000172831	"ENST00000417689,ENST00000561697,ENST00000317091,ENST00000568470,ENST00000566182,ENST00000570032,ENST00000566359,ENST00000561843,ENST00000564420,ENST00000567128,ENST00000568347,ENST00000563988"	"ENSP00000394452,ENSP00000463641,ENSP00000317842,ENSP00000456167,ENSP00000463166,ENSP00000457721,ENSP00000464620"
CES4A	-0.240447	0.752958	0.513368	0.220132	0.805518	0.0288799	PH_hs_0016728	Homo sapiens carboxylesterase 4A (CES4A)	1	283848	"NM_173815,NM_001190202,NM_001190201"	"NP_776176.5,NP_001177131.1,NP_001177130.1"	ENSG00000172824	"ENST00000540947,ENST00000567587,ENST00000538199,ENST00000535543,ENST00000540579,ENST00000535696,ENST00000543561,ENST00000544986,ENST00000535948,ENST00000397205,ENST00000544478"	"ENSP00000444052,ENSP00000458664,ENSP00000441103,ENSP00000444182,ENSP00000441907,ENSP00000441644"
CFAP221	-0.422773	0.208533	-1.19929	0.0390107	-0.385619	0.306042	PH_hs_0035685	Homo sapiens cilia and flagella associated protein 221 (CFAP221)	1	200373	"NM_001271049,NR_073132"	"NP_001257978.1,-"	ENSG00000163075	"ENST00000295220,ENST00000463985,ENST00000413057,ENST00000442513,ENST00000594033,ENST00000413369,ENST00000598644,ENST00000594371,ENST00000488358,ENST00000475569,ENST00000594141,ENST00000597189,ENST00000599827,ENST00000443972,ENST00000600951,ENST00000434869,ENST00000464578"	"ENSP00000295220,ENSP00000470662,ENSP00000391760,ENSP00000409912,ENSP00000470784,ENSP00000393222,ENSP00000472563,ENSP00000470283,ENSP00000472069,ENSP00000471092,ENSP00000413299,ENSP00000471998,ENSP00000399793"
CFAP44	0.0412789	0.861342	-0.44273	0.36166	-0.36006	0.0459057	PH_hs_0025523	Homo sapiens cilia and flagella associated protein 44 (CFAP44)	1	55779	NM_018338	NP_060808.2	ENSG00000206530	"ENST00000489244,ENST00000465636,ENST00000461734,ENST00000484923,ENST00000465510,ENST00000490481,ENST00000488854,ENST00000295868,ENST00000475568,ENST00000465186,ENST00000489938,ENST00000479422,ENST00000473143,ENST00000393845"	"ENSP00000418257,ENSP00000417371,ENSP00000418795,ENSP00000419269,ENSP00000419844,ENSP00000295868,ENSP00000418743,ENSP00000420375,ENSP00000419671,ENSP00000377428"
CFAP44	-0.447338	0.0217251	-0.22665	0.594717	-0.0571474	0.669186	PH_hs_0048500	Homo sapiens cilia and flagella associated protein 44 (CFAP44)	1	55779	NM_001164496	NP_001157968.1	ENSG00000206530	"ENST00000489244,ENST00000465636,ENST00000461734,ENST00000484923,ENST00000465510,ENST00000490481,ENST00000488854,ENST00000295868,ENST00000475568,ENST00000465186,ENST00000489938,ENST00000479422,ENST00000473143,ENST00000393845"	"ENSP00000418257,ENSP00000417371,ENSP00000418795,ENSP00000419269,ENSP00000419844,ENSP00000295868,ENSP00000418743,ENSP00000420375,ENSP00000419671,ENSP00000377428"
CFAP46	0.319335	0.0778858	0.823967	0.0495419	0.772442	0.0699581	PH_hs_0060977	Homo sapiens cilia and flagella associated protein 46 (CFAP46)	1	54777	NM_001200049	NP_001186978.2	ENSG00000171811	"ENST00000368586,ENST00000448925,ENST00000476633,ENST00000417862,ENST00000486104,ENST00000466834,ENST00000368585,ENST00000475340"	"ENSP00000357575,ENSP00000417039,ENSP00000357574"
CFAP61	-0.0392398	0.822302	-0.215849	0.0356097	-0.215849	0.0277802	PH_hs_0024195	Homo sapiens cilia and flagella associated protein 61 (CFAP61)	1	26074	NM_015585	NP_056400.3	ENSG00000089101	"ENST00000340348,ENST00000377306,ENST00000245957,ENST00000494029,ENST00000377303,ENST00000475466,ENST00000472660,ENST00000442372,ENST00000431753,ENST00000471716,ENST00000468719,ENST00000476414,ENST00000493330,ENST00000497372,ENST00000377293,ENST00000377308,ENST00000486624,ENST00000488640,ENST00000469994,ENST00000451767,ENST00000389656"	"ENSP00000345553,ENSP00000366521,ENSP00000245957,ENSP00000420438,ENSP00000366518,ENSP00000417086,ENSP00000420498,ENSP00000397311,ENSP00000388074,ENSP00000366508,ENSP00000366523,ENSP00000414537,ENSP00000374307"
CFAP61	-0.0392398	0.822302	-0.215849	0.0356097	-0.215849	0.0277802	PH_hs_0024195	Homo sapiens cilia and flagella associated protein 61 (CFAP61)	1	26074	NM_015585	NP_056400.3	ENSG00000089101	"ENST00000340348,ENST00000377306,ENST00000245957,ENST00000494029,ENST00000377303,ENST00000475466,ENST00000472660,ENST00000442372,ENST00000431753,ENST00000471716,ENST00000468719,ENST00000476414,ENST00000493330,ENST00000497372,ENST00000377293,ENST00000377308,ENST00000486624,ENST00000488640,ENST00000469994,ENST00000451767,ENST00000389656"	"ENSP00000345553,ENSP00000366521,ENSP00000245957,ENSP00000420438,ENSP00000366518,ENSP00000417086,ENSP00000420498,ENSP00000397311,ENSP00000388074,ENSP00000366508,ENSP00000366523,ENSP00000414537,ENSP00000374307"
CFHR1|CFHR2	0.21957	0.0678226	0.642103	0.00543425	0.540258	0.0463376	PH_hs_0049595	Homo sapiens complement factor H-related 1 (CFHR1)|Homo sapiens complement factor H-related 2 (CFHR2)	4	3078|3080	NM_002113|NM_005666	NP_002104.2|NP_005657.1	ENSG00000244414|ENSG00000080910	"ENST00000320493,ENST00000367424,ENST00000472961,ENST00000468079,ENST00000480960|ENST00000485647,ENST00000476712,ENST00000367415,ENST00000489703,ENST00000496448,ENST00000473386"	"ENSP00000314299,ENSP00000356394|ENSP00000476677,ENSP00000356385"
CFHR1|CFHR2	0.21957	0.0678226	0.642103	0.00543425	0.540258	0.0463376	PH_hs_0049595	Homo sapiens complement factor H-related 1 (CFHR1)|Homo sapiens complement factor H-related 2 (CFHR2)	4	3078|3080	NM_002113|NM_005666	NP_002104.2|NP_005657.1	ENSG00000244414|ENSG00000080910	"ENST00000320493,ENST00000367424,ENST00000472961,ENST00000468079,ENST00000480960|ENST00000485647,ENST00000476712,ENST00000367415,ENST00000489703,ENST00000496448,ENST00000473386"	"ENSP00000314299,ENSP00000356394|ENSP00000476677,ENSP00000356385"
CFHR3	-0.420085	0.596248	-0.96215	0.127116	-1.36006	0.0229056	PH_hs_0045946	Homo sapiens complement factor H-related 3 (CFHR3)	1	10878	"NM_001166624,NM_021023"	"NP_001160096.1,NP_066303.2"	ENSG00000116785	"ENST00000367425,ENST00000471440,ENST00000367427,ENST00000391985,ENST00000461558,ENST00000617219"	"ENSP00000356395,ENSP00000436258,ENSP00000356397,ENSP00000375845,ENSP00000481905"
CFLAR	0.606381	0.0733918	-0.0540149	0.841015	-0.241637	0.0433975	PH_hs_0045636	Homo sapiens CASP8 and FADD-like apoptosis regulator (CFLAR)	1	8837	NM_001127184	NP_001120656.1	ENSG00000003402	"ENST00000309955,ENST00000443227,ENST00000341222,ENST00000341582,ENST00000342795,ENST00000395148,ENST00000441224,ENST00000433445,ENST00000423241,ENST00000490965,ENST00000439154,ENST00000425030,ENST00000417748,ENST00000440180,ENST00000461820,ENST00000457277,ENST00000461422,ENST00000494258,ENST00000470178,ENST00000462763,ENST00000479953,ENST00000460961,ENST00000474842,ENST00000470664,ENST0000034087…	"ENSP00000312455,ENSP00000413270,ENSP00000339335,ENSP00000345807,ENSP00000342809,ENSP00000378580,ENSP00000411897,ENSP00000391029,ENSP00000399420,ENSP00000398551,ENSP00000409570,ENSP00000412882,ENSP00000406775,ENSP00000411535,ENSP00000469608,ENSP00000471749,ENSP00000469917,ENSP00000471805,ENSP00000339326"
CGB|CGB5|CGB7|CGB8	0.401271	0.252522	-0.0431177	0.917103	-0.804674	0.0270163	PH_hs_0062047	"Homo sapiens chorionic gonadotropin, beta polypeptide (CGB)|Homo sapiens chorionic gonadotropin, beta polypeptide 5 (CGB5)|Homo sapiens chorionic gonadotropin, beta polypeptide 7 (CGB7)|Homo sapiens chorionic gonadotropin, beta polypeptide 8 (CGB8)"	4	1082|93659|94027|94115	NM_000737|NM_033043|NM_033142|NM_033183	NP_000728.1|NP_149032.1|NP_149133.1|NP_149439.1	ENSG00000104827|ENSG00000189052|ENSG00000196337|ENSG00000213030	"ENST00000357383|ENST00000301408|ENST00000596965,ENST00000597853,ENST00000593309,ENST00000598442,ENST00000377280|ENST00000448456"	"ENSP00000349954|ENSP00000301408|ENSP00000469076,ENSP00000470813,ENSP00000366493|ENSP00000403649"
CGB|CGB8|CGB5|CGB7	0.500399	0.0328512	0.839795	0.0175705	0.801247	0.0243358	PH_hs_0039252	"Homo sapiens chorionic gonadotropin, beta polypeptide (CGB)|Homo sapiens chorionic gonadotropin, beta polypeptide 8 (CGB8)|Homo sapiens chorionic gonadotropin, beta polypeptide 5 (CGB5)|Homo sapiens chorionic gonadotropin, beta polypeptide 7 (CGB7)"	4	1082|94115|93659|94027	NM_000737|NM_033183|NM_033043|NM_033142	NP_000728.1|NP_149439.1|NP_149032.1|NP_149133.1	ENSG00000104827|ENSG00000213030|ENSG00000189052|ENSG00000196337	"ENST00000357383|ENST00000448456|ENST00000301408|ENST00000596965,ENST00000597853,ENST00000593309,ENST00000598442,ENST00000377280"	"ENSP00000349954|ENSP00000403649|ENSP00000301408|ENSP00000469076,ENSP00000470813,ENSP00000366493"
CGB|CGB8|CGB5|CGB7	0.500399	0.0328512	0.839795	0.0175705	0.801247	0.0243358	PH_hs_0039252	"Homo sapiens chorionic gonadotropin, beta polypeptide (CGB)|Homo sapiens chorionic gonadotropin, beta polypeptide 8 (CGB8)|Homo sapiens chorionic gonadotropin, beta polypeptide 5 (CGB5)|Homo sapiens chorionic gonadotropin, beta polypeptide 7 (CGB7)"	4	1082|94115|93659|94027	NM_000737|NM_033183|NM_033043|NM_033142	NP_000728.1|NP_149439.1|NP_149032.1|NP_149133.1	ENSG00000104827|ENSG00000213030|ENSG00000189052|ENSG00000196337	"ENST00000357383|ENST00000448456|ENST00000301408|ENST00000596965,ENST00000597853,ENST00000593309,ENST00000598442,ENST00000377280"	"ENSP00000349954|ENSP00000403649|ENSP00000301408|ENSP00000469076,ENSP00000470813,ENSP00000366493"
CGB|CGB8|CGB5|CGB7	0.500399	0.0328512	0.839795	0.0175705	0.801247	0.0243358	PH_hs_0039252	"Homo sapiens chorionic gonadotropin, beta polypeptide (CGB)|Homo sapiens chorionic gonadotropin, beta polypeptide 8 (CGB8)|Homo sapiens chorionic gonadotropin, beta polypeptide 5 (CGB5)|Homo sapiens chorionic gonadotropin, beta polypeptide 7 (CGB7)"	4	1082|94115|93659|94027	NM_000737|NM_033183|NM_033043|NM_033142	NP_000728.1|NP_149439.1|NP_149032.1|NP_149133.1	ENSG00000104827|ENSG00000213030|ENSG00000189052|ENSG00000196337	"ENST00000357383|ENST00000448456|ENST00000301408|ENST00000596965,ENST00000597853,ENST00000593309,ENST00000598442,ENST00000377280"	"ENSP00000349954|ENSP00000403649|ENSP00000301408|ENSP00000469076,ENSP00000470813,ENSP00000366493"
CGB1|CGB2	-0.43447	0.348471	-0.824411	0.36121	-1.63556	0.0188	PH_hs_0062259	"Homo sapiens chorionic gonadotropin, beta polypeptide 1 (CGB1)|Homo sapiens chorionic gonadotropin, beta polypeptide 2 (CGB2)"	4	114335|114336	NM_033377|NM_033378	NP_203695.2|NP_203696.2	ENSG00000267631|ENSG00000104818	"ENST00000301407,ENST00000601167|ENST00000474913,ENST00000359342"	"ENSP00000301407,ENSP00000472896|ENSP00000471177,ENSP00000352295"
CGB2|CGB1	0.0886069	0.478037	0.527073	0.0191773	0.439062	0.0213228	PH_hs_0062260	"Homo sapiens chorionic gonadotropin, beta polypeptide 2 (CGB2)|Homo sapiens chorionic gonadotropin, beta polypeptide 1 (CGB1)"	4	114336|114335	NM_033378|NM_033377	NP_203696.2|NP_203695.2	ENSG00000104818|ENSG00000267631	"ENST00000474913,ENST00000359342|ENST00000301407,ENST00000601167"	"ENSP00000471177,ENSP00000352295|ENSP00000301407,ENSP00000472896"
CGB2|CGB1	0.0886069	0.478037	0.527073	0.0191773	0.439062	0.0213228	PH_hs_0062260	"Homo sapiens chorionic gonadotropin, beta polypeptide 2 (CGB2)|Homo sapiens chorionic gonadotropin, beta polypeptide 1 (CGB1)"	4	114336|114335	NM_033378|NM_033377	NP_203696.2|NP_203695.2	ENSG00000104818|ENSG00000267631	"ENST00000474913,ENST00000359342|ENST00000301407,ENST00000601167"	"ENSP00000471177,ENSP00000352295|ENSP00000301407,ENSP00000472896"
CGB8|CGB|CGB5|CGB7	-0.291772	0.199143	-0.263655	0.505397	-1.27313	0.0100496	PH_hs_0062258	"Homo sapiens chorionic gonadotropin, beta polypeptide 8 (CGB8)|Homo sapiens chorionic gonadotropin, beta polypeptide (CGB)|Homo sapiens chorionic gonadotropin, beta polypeptide 5 (CGB5)|Homo sapiens chorionic gonadotropin, beta polypeptide 7 (CGB7)"	4	94115|1082|93659|94027	NM_033183|NM_000737|NM_033043|NM_033142	NP_149439.1|NP_000728.1|NP_149032.1|NP_149133.1	ENSG00000213030|ENSG00000104827|ENSG00000189052|ENSG00000196337	"ENST00000448456|ENST00000357383|ENST00000301408|ENST00000596965,ENST00000597853,ENST00000593309,ENST00000598442,ENST00000377280"	"ENSP00000403649|ENSP00000349954|ENSP00000301408|ENSP00000469076,ENSP00000470813,ENSP00000366493"
CGREF1	0.146784	0.734754	-0.48432	0.00986347	-0.48432	0.00869992	PH_hs_0045941	Homo sapiens cell growth regulator with EF-hand domain 1 (CGREF1)	1	10669	NM_001166240	NP_001159712.1	ENSG00000138028	"ENST00000440612,ENST00000402550,ENST00000402394,ENST00000405600,ENST00000312734,ENST00000404694,ENST00000467539,ENST00000260595"	"ENSP00000394306,ENSP00000385103,ENSP00000385452,ENSP00000386113,ENSP00000324025,ENSP00000385574,ENSP00000260595"
CGREF1	0.146784	0.734754	-0.48432	0.00986347	-0.48432	0.00869992	PH_hs_0045941	Homo sapiens cell growth regulator with EF-hand domain 1 (CGREF1)	1	10669	NM_001166240	NP_001159712.1	ENSG00000138028	"ENST00000440612,ENST00000402550,ENST00000402394,ENST00000405600,ENST00000312734,ENST00000404694,ENST00000467539,ENST00000260595"	"ENSP00000394306,ENSP00000385103,ENSP00000385452,ENSP00000386113,ENSP00000324025,ENSP00000385574,ENSP00000260595"
CHAC1	-0.258063	0.212811	-0.146971	0.422349	-0.288134	0.0260881	PH_hs_0009370	Homo sapiens ChaC glutathione-specific gamma-glutamylcyclotransferase 1 (CHAC1)	1	79094	"NM_001142776,NM_024111"	"NP_001136248.1,NP_077016.2"	ENSG00000128965	"ENST00000444189,ENST00000446533,ENST00000617961,ENST00000487220,ENST00000617768"	"ENSP00000395466,ENSP00000398105,ENSP00000481816,ENSP00000452707,ENSP00000484644"
CHAD	0.214117	0.102072	0.587146	0.0146224	0.55516	0.0217053	PH_hs_0005269	Homo sapiens chondroadherin (CHAD)	1	1101	NM_001267	NP_001258.2	ENSG00000136457	"ENST00000506187,ENST00000508540,ENST00000258969"	"ENSP00000425672,ENSP00000423812,ENSP00000258969"
CHAD	0.214117	0.102072	0.587146	0.0146224	0.55516	0.0217053	PH_hs_0005269	Homo sapiens chondroadherin (CHAD)	1	1101	NM_001267	NP_001258.2	ENSG00000136457	"ENST00000506187,ENST00000508540,ENST00000258969"	"ENSP00000425672,ENSP00000423812,ENSP00000258969"
CHCHD10	-0.465738	0.013913	-0.214636	0.0700274	-0.0541701	0.501496	PH_hs_0044870	Homo sapiens coiled-coil-helix-coiled-coil-helix domain containing 10 (CHCHD10)	1	400916	NM_213720	NP_998885.1	ENSG00000273607	"ENST00000631145,ENST00000620558,ENST00000629095,ENST00000626885,ENST00000626041"	"ENSP00000486207,ENSP00000480602,ENSP00000487006,ENSP00000486793"
CHD3	0.125678	0.167819	0.326383	0.0522594	0.190633	0.0731615	PH_hs_0040667	Homo sapiens chromodomain helicase DNA binding protein 3 (CHD3)	1	1107	"NM_001005273,NM_005852,NM_001005271"	"NP_001005273.1,NP_005843.2,NP_001005271.2"	ENSG00000170004	"ENST00000380358,ENST00000358181,ENST00000330494,ENST00000570758,ENST00000574022,ENST00000452447,ENST00000572579,ENST00000571249,ENST00000479080,ENST00000470531,ENST00000466233,ENST00000473376,ENST00000572750,ENST00000439235,ENST00000573936,ENST00000449744,ENST00000481999"	"ENSP00000369716,ENSP00000350907,ENSP00000332628,ENSP00000405861,ENSP00000458861,ENSP00000467547,ENSP00000395252,ENSP00000459321,ENSP00000411959"
CHD5	-0.16935	0.395819	-0.546501	0.0541164	-0.418548	0.168596	PH_hs_0018829	Homo sapiens chromodomain helicase DNA binding protein 5 (CHD5)	1	26038	NM_015557	NP_056372.1	ENSG00000116254	"ENST00000262450,ENST00000475121,ENST00000462991,ENST00000377999,ENST00000496404,ENST00000491020"	"ENSP00000262450,ENSP00000466440,ENSP00000466706,ENSP00000367238,ENSP00000433676,ENSP00000468624"
CHD7	-0.293311	0.0442022	-0.137716	0.568641	-0.30966	0.0332118	PH_hs_0024579	Homo sapiens chromodomain helicase DNA binding protein 7 (CHD7)	1	55636	NM_017780	NP_060250.2	ENSG00000171316	"ENST00000528280,ENST00000532149,ENST00000618450,ENST00000531695,ENST00000529472,ENST00000527921,ENST00000527900,ENST00000527825,ENST00000525508,ENST00000524602,ENST00000526846,ENST00000423902"	"ENSP00000433336,ENSP00000432627,ENSP00000436027,ENSP00000437061,ENSP00000436492,ENSP00000392028"
CHD7	-0.293311	0.0442022	-0.137716	0.568641	-0.30966	0.0332118	PH_hs_0024579	Homo sapiens chromodomain helicase DNA binding protein 7 (CHD7)	1	55636	NM_017780	NP_060250.2	ENSG00000171316	"ENST00000528280,ENST00000532149,ENST00000618450,ENST00000531695,ENST00000529472,ENST00000527921,ENST00000527900,ENST00000527825,ENST00000525508,ENST00000524602,ENST00000526846,ENST00000423902"	"ENSP00000433336,ENSP00000432627,ENSP00000436027,ENSP00000437061,ENSP00000436492,ENSP00000392028"
CHGA	-0.102937	0.881703	0.290081	0.392732	1.06951	0.0253163	PH_hs_0022372	Homo sapiens chromogranin A (CHGA)	1	1113	NM_001275	NP_001266.1	ENSG00000100604	"ENST00000216492,ENST00000556076,ENST00000334654,ENST00000553866,ENST00000556098,ENST00000556876"	"ENSP00000216492,ENSP00000450801,ENSP00000334023"
CHIA	0.280438	0.0318047	0.665642	0.00308226	0.54327	0.0049697	PH_hs_0007476	"Homo sapiens chitinase, acidic (CHIA)"	1	27159	"NM_001258005,NM_001258001,NM_021797,NM_001258004,NM_001258003,NM_001258002,NM_201653,NM_001040623"	"NP_001244934.1,NP_001244930.1,NP_068569.2,NP_001244933.1,NP_001244932.1,NP_001244931.1,NP_970615.2,NP_001035713.1"	ENSG00000134216	"ENST00000422815,ENST00000483391,ENST00000369740,ENST00000352594,ENST00000477918,ENST00000353665,ENST00000489524,ENST00000430615,ENST00000451398,ENST00000343320"	"ENSP00000387671,ENSP00000436946,ENSP00000358755,ENSP00000271312,ENSP00000338970,ENSP00000433309,ENSP00000391132,ENSP00000390476,ENSP00000341828"
CHIA	0.280438	0.0318047	0.665642	0.00308226	0.54327	0.0049697	PH_hs_0007476	"Homo sapiens chitinase, acidic (CHIA)"	1	27159	"NM_001258005,NM_001258001,NM_021797,NM_001258004,NM_001258003,NM_001258002,NM_201653,NM_001040623"	"NP_001244934.1,NP_001244930.1,NP_068569.2,NP_001244933.1,NP_001244932.1,NP_001244931.1,NP_970615.2,NP_001035713.1"	ENSG00000134216	"ENST00000422815,ENST00000483391,ENST00000369740,ENST00000352594,ENST00000477918,ENST00000353665,ENST00000489524,ENST00000430615,ENST00000451398,ENST00000343320"	"ENSP00000387671,ENSP00000436946,ENSP00000358755,ENSP00000271312,ENSP00000338970,ENSP00000433309,ENSP00000391132,ENSP00000390476,ENSP00000341828"
CHIA	0.280438	0.0318047	0.665642	0.00308226	0.54327	0.0049697	PH_hs_0007476	"Homo sapiens chitinase, acidic (CHIA)"	1	27159	"NM_001258005,NM_001258001,NM_021797,NM_001258004,NM_001258003,NM_001258002,NM_201653,NM_001040623"	"NP_001244934.1,NP_001244930.1,NP_068569.2,NP_001244933.1,NP_001244932.1,NP_001244931.1,NP_970615.2,NP_001035713.1"	ENSG00000134216	"ENST00000422815,ENST00000483391,ENST00000369740,ENST00000352594,ENST00000477918,ENST00000353665,ENST00000489524,ENST00000430615,ENST00000451398,ENST00000343320"	"ENSP00000387671,ENSP00000436946,ENSP00000358755,ENSP00000271312,ENSP00000338970,ENSP00000433309,ENSP00000391132,ENSP00000390476,ENSP00000341828"
CHL1	0.103292	0.825202	-0.957805	0.0428003	-0.52762	0.373776	PH_hs_0047443	Homo sapiens cell adhesion molecule L1-like (CHL1)	1	10752	"NM_001253387,NM_001253388,NM_006614"	"NP_001240316.1,NP_001240317.1,NP_006605.2"	ENSG00000134121	"ENST00000256509,ENST00000481167,ENST00000397491,ENST00000427688,ENST00000421198,ENST00000489224,ENST00000453040,ENST00000435603,ENST00000486881,ENST00000449294,ENST00000461289,ENST00000471332,ENST00000470880,ENST00000470005,ENST00000445697,ENST00000620033"	"ENSP00000256509,ENSP00000380628,ENSP00000403311,ENSP00000413628,ENSP00000413109,ENSP00000397445,ENSP00000390440,ENSP00000395239,ENSP00000483512"
CHMP4B	0.770694	0.0401546	0.991287	0.233763	0.331973	0.402509	PH_hs_0040162	Homo sapiens charged multivesicular body protein 4B (CHMP4B)	1	128866	NM_176812	NP_789782.1	ENSG00000101421	ENST00000217402	ENSP00000217402
CHODL-AS1	-0.732477	0.0015488	1.07694	0.000444654	1.21728	0.119414	PH_hs_0037891	Homo sapiens CHODL antisense RNA 1 (CHODL-AS1)	1	54075	NR_024354	-	NA	NA	NA
CHODL-AS1	-0.732477	0.0015488	1.07694	0.000444654	1.21728	0.119414	PH_hs_0037891	Homo sapiens CHODL antisense RNA 1 (CHODL-AS1)	1	54075	NR_024354	-	NA	NA	NA
CHRDL1	0.0874772	0.851336	-0.115016	0.66996	0.770711	0.0419539	PH_hs_0048492	Homo sapiens chordin-like 1 (CHRDL1)	1	91851	"NM_001143983,NM_145234,NM_001143982,NM_001143981"	"NP_001137455.2,NP_660277.2,NP_001137454.1,NP_001137453.1"	ENSG00000101938	"ENST00000372045,ENST00000394797,ENST00000372042,ENST00000482160,ENST00000444321"	"ENSP00000361115,ENSP00000378276,ENSP00000361112,ENSP00000418443,ENSP00000399739"
CHRM1	-0.0743711	0.916078	-0.017403	0.899007	0.946819	0.0118062	PH_hs_0029494	"Homo sapiens cholinergic receptor, muscarinic 1 (CHRM1)"	1	1128	NM_000738	NP_000729.2	ENSG00000168539	"ENST00000306960,ENST00000543973,ENST00000536524"	"ENSP00000306490,ENSP00000441188,ENSP00000444482"
CHRM5	0.145055	0.522371	0.425165	0.156384	0.669869	0.0519056	PH_hs_0047823	"Homo sapiens cholinergic receptor, muscarinic 5 (CHRM5)"	1	1133	NM_012125	NP_036257.1	ENSG00000184984	"ENST00000560035,ENST00000383263,ENST00000557872"	"ENSP00000452742,ENSP00000372750,ENSP00000453745"
CHRNA2	-0.178811	0.563951	-0.0737131	0.846802	-1.12958	0.0296446	PH_hs_0047879	"Homo sapiens cholinergic receptor, nicotinic, alpha 2 (neuronal)"	1	1135	NM_000742	NP_000733.2	ENSG00000120903	"ENST00000520933,ENST00000520600,ENST00000523529,ENST00000523695,ENST00000240132,ENST00000522008,ENST00000524096,ENST00000518712,ENST00000520650,ENST00000521921,ENST00000520208,ENST00000407991"	"ENSP00000429616,ENSP00000430612,ENSP00000240132,ENSP00000430422,ENSP00000430856,ENSP00000429953,ENSP00000430994,ENSP00000385026"
CHRNA3	0.131762	0.256572	0.521422	0.109972	0.559516	0.0148666	PH_hs_0045694	"Homo sapiens cholinergic receptor, nicotinic, alpha 3 (neuronal)"	1	1136	"NR_046313,NM_001166694"	"-,NP_001160166.1"	ENSG00000080644	"ENST00000559002,ENST00000559658,ENST00000348639,ENST00000326828,ENST00000558903,ENST00000561128,ENST00000559080,ENST00000559941"	"ENSP00000452896,ENSP00000267951,ENSP00000315602,ENSP00000453993"
CHRNA7	-0.269193	0.33176	-0.338293	0.295485	-0.617535	0.00491864	PH_hs_0040493	"Homo sapiens cholinergic receptor, nicotinic, alpha 7 (neuronal)"	1	1139	"NM_000746,NM_001190455"	"NP_000737.1,NP_001177384.1"	ENSG00000175344	"ENST00000454250,ENST00000306901,ENST00000437966"	"ENSP00000407546,ENSP00000303727,ENSP00000399087"
CHRND	0.120153	0.580695	0.419245	0.0378371	0.194281	0.0737259	PH_hs_0022707	"Homo sapiens cholinergic receptor, nicotinic, delta (muscle)"	1	1144	"NM_001256657,NM_000751,NR_046334,NR_046333"	"NP_001243586.1,NP_000742.1,-,-"	ENSG00000135902	"ENST00000441621,ENST00000449596,ENST00000258385,ENST00000412233,ENST00000446616,ENST00000543200"	"ENSP00000408819,ENSP00000404950,ENSP00000258385,ENSP00000398143,ENSP00000410801,ENSP00000438380"
CHRNE	0.105249	0.486772	0.163239	0.65495	0.294908	0.0264741	PH_hs_0015915	"Homo sapiens cholinergic receptor, nicotinic, epsilon (muscle)"	1	1145	NM_000080	NP_000071.1	ENSG00000108556	"ENST00000293780,ENST00000572438,ENST00000575637"	ENSP00000293780
CHRNG	0.784935	0.0430716	-0.0574291	0.936586	0.270241	0.759388	PH_hs_0013145	"Homo sapiens cholinergic receptor, nicotinic, gamma (muscle)"	1	1146	NM_005199	NP_005190.4	ENSG00000196811	"ENST00000485094,ENST00000389494,ENST00000389492"	"ENSP00000374145,ENSP00000374143"
CHST2	-0.0970357	0.750625	-0.326995	0.0236045	-0.121225	0.113651	PH_hs_0000929	Homo sapiens carbohydrate (N-acetylglucosamine-6-O)	1	9435	NM_004267	NP_004258.2	ENSG00000175040	ENST00000309575	ENSP00000307911
CHST5	0.186295	0.327561	0.908481	0.0115549	0.79185	0.01362	PH_hs_0061429	Homo sapiens carbohydrate (N-acetylglucosamine 6-O)	1	23563	NM_024533	NP_078809.2	ENSG00000135702	"ENST00000336257,ENST00000565039"	"ENSP00000338783,ENSP00000454375"
CHST5	0.186295	0.327561	0.908481	0.0115549	0.79185	0.01362	PH_hs_0061429	Homo sapiens carbohydrate (N-acetylglucosamine 6-O)	1	23563	NM_024533	NP_078809.2	ENSG00000135702	"ENST00000336257,ENST00000565039"	"ENSP00000338783,ENSP00000454375"
CIART	-0.0779037	0.756247	-0.783084	0.0202873	-0.114943	0.857791	PH_hs_0031242	Homo sapiens circadian associated repressor of transcription (CIART)	1	148523	NM_144697	NP_653298.1	ENSG00000159208	"ENST00000447007,ENST00000369095,ENST00000369094,ENST00000417398,ENST00000290363,ENST00000469255,ENST00000497211"	"ENSP00000406199,ENSP00000358091,ENSP00000358090,ENSP00000398291,ENSP00000290363"
CIART	-0.110199	0.65052	0.00185781	0.981609	-0.28161	0.018729	PH_hs_0003590	Homo sapiens circadian associated repressor of transcription (CIART)	1	148523	NM_144697	NP_653298.1	ENSG00000159208	"ENST00000447007,ENST00000369095,ENST00000369094,ENST00000417398,ENST00000290363,ENST00000469255,ENST00000497211"	"ENSP00000406199,ENSP00000358091,ENSP00000358090,ENSP00000398291,ENSP00000290363"
CKLF|CKLF-CMTM1	0.147476	0.170779	-0.238617	0.541376	-0.25583	0.0488296	PH_hs_0062100	Homo sapiens chemokine-like factor (CKLF)|Homo sapiens CKLF-CMTM1 readthrough (CKLF-CMTM1)	4	51192|100529251	"NM_001040138,NM_016951,NM_181640|NM_001204098"	"NP_001035228.1,NP_058647.1,NP_857591.1|NP_001191027.1"	ENSG00000217555|ENSG00000254788	"ENST00000534692,ENST00000264001,ENST00000351137,ENST00000345436,ENST00000362093,ENST00000526149,ENST00000417030,ENST00000563092|ENST00000527845,ENST00000527729,ENST00000532838,ENST00000529718,ENST00000615332,ENST00000616804"	"ENSP00000431270,ENSP00000264001,ENSP00000264003,ENSP00000290771,ENSP00000355417,ENSP00000416678|ENSP00000435007,ENSP00000433998,ENSP00000433857,ENSP00000433503,ENSP00000484781,ENSP00000479319"
CLASP1	-0.0514556	0.711569	-0.30656	0.053109	-0.17812	0.134606	PH_hs_0025548	Homo sapiens cytoplasmic linker associated protein 1 (CLASP1)	1	23332	"NM_001207051,NM_001142274,NM_001142273,NM_015282"	"NP_001193980.1,NP_001135746.1,NP_001135745.1,NP_056097.1"	ENSG00000074054	"ENST00000409078,ENST00000452274,ENST00000472776,ENST00000463621,ENST00000430234,ENST00000491646,ENST00000418989,ENST00000449975,ENST00000474065,ENST00000480007,ENST00000485112,ENST00000455322,ENST00000541377,ENST00000397587,ENST00000263710"	"ENSP00000386442,ENSP00000400562,ENSP00000392886,ENSP00000402101,ENSP00000389372,ENSP00000441625,ENSP00000380717,ENSP00000263710"
CLCA3P	-0.293734	0.481173	-0.33564	0.236255	-0.747165	0.0328042	PH_hs_0026903	"Homo sapiens chloride channel accessory 3, pseudogene (CLCA3P)"	1	9629	NR_024604	-	ENSG00000153923	"ENST00000284054,ENST00000490028,ENST00000466454"
CLCN1	-0.554515	0.0161776	-0.322836	0.026816	-0.365928	0.518198	PH_hs_0006755	"Homo sapiens chloride channel, voltage-sensitive 1 (CLCN1)"	1	1180	"NM_000083,NR_046453"	"NP_000074.2,-"	ENSG00000188037	"ENST00000343257,ENST00000432192,ENST00000455478,ENST00000495612"	"ENSP00000339867,ENSP00000395949,ENSP00000400027"
CLCN1	-0.554515	0.0161776	-0.322836	0.026816	-0.365928	0.518198	PH_hs_0006755	"Homo sapiens chloride channel, voltage-sensitive 1 (CLCN1)"	1	1180	"NM_000083,NR_046453"	"NP_000074.2,-"	ENSG00000188037	"ENST00000343257,ENST00000432192,ENST00000455478,ENST00000495612"	"ENSP00000339867,ENSP00000395949,ENSP00000400027"
CLCN2	0.055957	0.666674	0.342314	0.0193432	-0.126556	0.222516	PH_hs_0019682	"Homo sapiens chloride channel, voltage-sensitive 2 (CLCN2)"	1	1181	"NM_001171087,NM_001171088,NM_001171089,NM_004366"	"NP_001164558.1,NP_001164559.1,NP_001164560.1,NP_004357.3"	ENSG00000114859	"ENST00000265593,ENST00000344937,ENST00000430397,ENST00000434054,ENST00000457512,ENST00000491162,ENST00000485667,ENST00000475279,ENST00000465231"	"ENSP00000265593,ENSP00000345056,ENSP00000396231,ENSP00000400425,ENSP00000391928"
CLCN6	-0.180807	0.604061	-0.048455	0.941243	0.952224	0.00108622	PH_hs_0028254	"Homo sapiens chloride channel, voltage-sensitive 6 (CLCN6)"	1	1185	"NM_001256959,NM_001286,NR_046428"	"NP_001243888.1,NP_001277.1,-"	ENSG00000011021	"ENST00000346436,ENST00000376497,ENST00000376496,ENST00000376490,ENST00000376491,ENST00000376492,ENST00000494028,ENST00000312413"	"ENSP00000234488,ENSP00000365680,ENSP00000365679,ENSP00000308367"
CLDN12	-0.301152	0.551269	-0.284818	0.463572	1.08428	0.000339189	PH_hs_0030721	Homo sapiens claudin 12 (CLDN12)	1	9069	"NM_012129,NM_001185073,NM_001185072"	"NP_036261.1,NP_001172002.1,NP_001172001.1"	ENSG00000157224	"ENST00000416322,ENST00000496677,ENST00000287916,ENST00000462636,ENST00000495768,ENST00000394604,ENST00000394605,ENST00000498033,ENST00000483862,ENST00000498326,ENST00000427904,ENST00000451941,ENST00000478752,ENST00000485696,ENST00000476475"	"ENSP00000411399,ENSP00000419053,ENSP00000287916,ENSP00000378102,ENSP00000378103,ENSP00000391062"
CLDN12	-0.450855	0.0106811	-0.274736	0.250246	0.032212	0.852813	PH_hs_0048455	Homo sapiens claudin 12 (CLDN12)	1	9069	"NM_012129,NM_001185073,NM_001185072"	"NP_036261.1,NP_001172002.1,NP_001172001.1"	ENSG00000157224	"ENST00000416322,ENST00000496677,ENST00000287916,ENST00000462636,ENST00000495768,ENST00000394604,ENST00000394605,ENST00000498033,ENST00000483862,ENST00000498326,ENST00000427904,ENST00000451941,ENST00000478752,ENST00000485696,ENST00000476475"	"ENSP00000411399,ENSP00000419053,ENSP00000287916,ENSP00000378102,ENSP00000378103,ENSP00000391062"
CLDN5	-0.209782	0.28484	-0.113281	0.608778	-0.577214	0.0389745	PH_hs_0029088	Homo sapiens claudin 5 (CLDN5)	1	7122	"NM_001130861,NM_003277"	"NP_001124333.1,NP_003268.2"	ENSG00000184113	"ENST00000406028,ENST00000618236,ENST00000403084,ENST00000413119"	"ENSP00000385477,ENSP00000480623,ENSP00000384554,ENSP00000400612"
CLDN6	-0.979925	0.00856577	-1.18122	0.519769	-0.00120398	0.996744	PH_hs_0043926	Homo sapiens claudin 6 (CLDN6)	1	9074	NM_021195	NP_067018.2	ENSG00000184697	"ENST00000396925,ENST00000572154,ENST00000328796"	"ENSP00000380131,ENSP00000458783,ENSP00000328674"
CLDN8	-0.571759	0.0493298	-0.510868	0.0718146	-0.504435	0.0745038	PH_hs_0009847	Homo sapiens claudin 8 (CLDN8)	1	9073	NM_199328	NP_955360.1	ENSG00000156284	ENST00000399899	ENSP00000382783
CLDND1	0.0216887	0.91532	-0.344042	0.0376862	-0.191636	0.378188	PH_hs_0005965	Homo sapiens claudin domain containing 1 (CLDND1)	1	56650	"NM_001040199,NM_001040181,NM_001040200,NM_001040183,NM_001040182,NM_019895"	"NP_001035289.1,NP_001035271.1,NP_001035290.1,NP_001035273.1,NP_001035272.1,NP_063948.1"	ENSG00000080822	"ENST00000502288,ENST00000507874,ENST00000341181,ENST00000394180,ENST00000506885,ENST00000503004,ENST00000394185,ENST00000394181,ENST00000513873,ENST00000510545,ENST00000511081,ENST00000513287,ENST00000506927,ENST00000511667,ENST00000513452,ENST00000502299,ENST00000512147,ENST00000508902,ENST00000510541,ENST00000508503,ENST00000514537,ENST00000507411,ENST00000515620,ENST00000507944,ENST0000050865…	"ENSP00000423592,ENSP00000422428,ENSP00000340247,ENSP00000377734,ENSP00000422116,ENSP00000421226,ENSP00000377739,ENSP00000377735,ENSP00000426164,ENSP00000423590,ENSP00000424669,ENSP00000426869,ENSP00000423732,ENSP00000425539,ENSP00000420913,ENSP00000427119,ENSP00000421413,ENSP00000424484,ENSP00000423151,ENSP00000423093,ENSP00000425204,ENSP00000427658,ENSP00000427385,ENSP00000424589,ENSP0000042525…
CLEC18C|CLEC18B|CLEC18A	0.0723777	0.482253	0.356594	0.166187	0.391254	0.0414833	PH_hs_0030431	"Homo sapiens C-type lectin domain family 18, member C (CLEC18C)|Homo sapiens C-type lectin domain family 18, member B (CLEC18B)|Homo sapiens C-type lectin domain family 18, member A (CLEC18A)"	4	283971|497190|348174	"NM_173619|NM_001011880|NM_182619,NM_001271197,NM_001136214"	"NP_775890.2|NP_001011880.2|NP_872425.2,NP_001258126.1,NP_001129686.1"	ENSG00000157335|ENSG00000157335|ENSG00000157322	ENST00000611356|ENST00000611356|ENST00000620064	ENSP00000478937|ENSP00000478937|ENSP00000483531
CLEC3B	0.424839	0.651627	-0.51089	0.512514	-1.24927	0.00205844	PH_hs_0061756	"Homo sapiens C-type lectin domain family 3, member B (CLEC3B)"	1	7123	NM_003278	NP_003269.2	ENSG00000163815	"ENST00000490386,ENST00000296130,ENST00000428034"	"ENSP00000296130,ENSP00000396013"
CLEC3B	0.245693	0.0729041	-0.162999	0.254812	-0.539587	0.0109036	PH_hs_0004018	"Homo sapiens C-type lectin domain family 3, member B (CLEC3B)"	1	7123	NM_003278	NP_003269.2	ENSG00000163815	"ENST00000490386,ENST00000296130,ENST00000428034"	"ENSP00000296130,ENSP00000396013"
CLEC4D	0.249169	0.199721	-0.0881128	0.494823	-0.356722	0.0527032	PH_hs_0032798	"Homo sapiens C-type lectin domain family 4, member D (CLEC4D)"	1	338339	NM_080387	NP_525126.2	ENSG00000166527	"ENST00000382064,ENST00000299665"	"ENSP00000371496,ENSP00000299665"
CLIC6	-0.45217	0.441586	-1.08511	0.038813	-0.725303	0.191297	PH_hs_0017133	Homo sapiens chloride intracellular channel 6 (CLIC6)	1	54102	NM_053277	NP_444507.1	ENSG00000159212	"ENST00000360731,ENST00000349499"	"ENSP00000353959,ENSP00000290332"
CLIP4	0.320275	0.668936	-0.518984	0.316003	-0.916898	0.0448675	PH_hs_0028187	"Homo sapiens CAP-GLY domain containing linker protein family, member 4 (CLIP4)"	1	79745	NM_024692	NP_078968.3	ENSG00000115295	"ENST00000401605,ENST00000401617,ENST00000415891,ENST00000404424,ENST00000456385,ENST00000320081,ENST00000449202,ENST00000491701,ENST00000471165,ENST00000438819,ENST00000493551,ENST00000481628"	"ENSP00000384242,ENSP00000385148,ENSP00000414417,ENSP00000385594,ENSP00000399029,ENSP00000327009,ENSP00000393354,ENSP00000392296"
CLMP	-0.698737	0.0866976	0.466159	0.215902	1.20295	0.0361684	PH_hs_0042237	Homo sapiens CXADR-like membrane protein (CLMP)	1	79827	NM_024769	NP_079045.1	ENSG00000166250	"ENST00000448775,ENST00000530371,ENST00000527977,ENST00000529128"	ENSP00000405577
CLN3	0.645129	0.0232984	-0.0497497	0.912978	-0.219389	0.0506871	PH_hs_0030338	"Homo sapiens ceroid-lipofuscinosis, neuronal 3 (CLN3)"	1	1201	"NM_000086,NM_001042432"	"NP_000077.1,NP_001035897.1"	ENSG00000261832	"ENST00000568224,ENST00000623866"	"ENSP00000454253,ENSP00000485589"
CLN3	0.645129	0.0232984	-0.0497497	0.912978	-0.219389	0.0506871	PH_hs_0030338	"Homo sapiens ceroid-lipofuscinosis, neuronal 3 (CLN3)"	1	1201	"NM_000086,NM_001042432"	"NP_000077.1,NP_001035897.1"	ENSG00000261832	"ENST00000568224,ENST00000623866"	"ENSP00000454253,ENSP00000485589"
CMAHP	0.593066	0.0341188	-1.25199	0.278876	0.132882	0.397888	PH_hs_0038900	"Homo sapiens cytidine monophospho-N-acetylneuraminic acid hydroxylase, pseudogene (CMAHP)"	1	8418	NR_002174	-	NA	NA	NA
CMKLR1	0.348898	0.0526643	0.480964	0.069807	0.259628	0.258089	PH_hs_0011636	Homo sapiens chemerin chemokine-like receptor 1 (CMKLR1)	1	1240	"NM_001142345,NM_001142344,NM_001142343,NM_004072"	"NP_001135817.1,NP_001135816.1,NP_001135815.1,NP_004063.1"	ENSG00000174600	"ENST00000312143,ENST00000552995,ENST00000550402,ENST00000550573,ENST00000549466,ENST00000412676"	"ENSP00000311733,ENSP00000447579,ENSP00000449716,ENSP00000448925,ENSP00000448362,ENSP00000401293"
CMTM2	-0.255573	0.231696	-0.297273	0.256913	-0.600736	0.0426458	PH_hs_0011560	Homo sapiens CKLF-like MARVEL transmembrane domain containing 2 (CMTM2)	1	146225	"NM_144673,NM_001199317"	"NP_653274.1,NP_001186246.1"	ENSG00000140932	"ENST00000379486,ENST00000268595,ENST00000569316,ENST00000532362"	"ENSP00000368800,ENSP00000268595,ENSP00000454319"
CMTM4	0.375934	0.0480132	-0.208877	0.336627	0.130755	0.319101	PH_hs_0032671	Homo sapiens CKLF-like MARVEL transmembrane domain containing 4 (CMTM4)	1	146223	"NM_181521,NM_178818"	"NP_852662.1,NP_848933.1"	ENSG00000183723	"ENST00000581487,ENST00000330687,ENST00000561680,ENST00000394106,ENST00000563952"	"ENSP00000333833,ENSP00000464316,ENSP00000377666,ENSP00000456380"
CNNM3	-0.146133	0.405808	-0.0678628	0.397149	-0.190628	0.0525741	PH_hs_0024964	Homo sapiens cyclin and CBS domain divalent metal cation transport mediator 3 (CNNM3)	1	26505	"NM_199078,NM_017623"	"NP_951060.1,NP_060093.3"	ENSG00000168763	"ENST00000377060,ENST00000305510,ENST00000465224,ENST00000494595,ENST00000480035"	"ENSP00000366260,ENSP00000305449"
CNOT2	-0.417723	0.0406151	-0.169796	0.21589	-0.0694233	0.513823	PH_hs_0047530	"Homo sapiens CCR4-NOT transcription complex, subunit 2 (CNOT2)"	1	4848	"NM_001199303,NM_001199302,NM_014515,NR_037615"	"NP_001186232.1,NP_001186231.1,NP_055330.1,-"	ENSG00000111596	"ENST00000552231,ENST00000547780,ENST00000418359,ENST00000552319,ENST00000550160,ENST00000551661,ENST00000553078,ENST00000551132,ENST00000548021,ENST00000552915,ENST00000549443,ENST00000548741,ENST00000552483,ENST00000552422,ENST00000551179,ENST00000547321,ENST00000550641,ENST00000553020,ENST00000548159,ENST00000549750,ENST00000551043,ENST00000547867,ENST00000551873,ENST00000550194,ENST0000054859…	"ENSP00000450318,ENSP00000450283,ENSP00000412091,ENSP00000448453,ENSP00000448490,ENSP00000449385,ENSP00000449801,ENSP00000447497,ENSP00000448255,ENSP00000450077,ENSP00000448024,ENSP00000449084,ENSP00000449659,ENSP00000449577,ENSP00000449260,ENSP00000448660,ENSP00000450090,ENSP00000449446,ENSP00000449917,ENSP00000483096,ENSP00000448883,ENSP00000446507,ENSP00000448298,ENSP00000448808,ENSP0000044781…
CNOT8	-0.292627	0.0525603	-0.182251	0.139263	-0.125319	0.491862	PH_hs_0002358	"Homo sapiens CCR4-NOT transcription complex, subunit 8 (CNOT8)"	1	9337	NM_004779	NP_004770.4	ENSG00000155508	"ENST00000521174,ENST00000523270,ENST00000518782,ENST00000523698,ENST00000517876,ENST00000520472,ENST00000519211,ENST00000522458,ENST00000519903,ENST00000521450,ENST00000403027,ENST00000517568,ENST00000524105,ENST00000285896,ENST00000519430,ENST00000520671,ENST00000521583,ENST00000518028,ENST00000519404,ENST00000519394,ENST00000521729,ENST00000518775,ENST00000522644,ENST00000521402,ENST0000052213…	"ENSP00000428565,ENSP00000430493,ENSP00000430215,ENSP00000429108,ENSP00000428550,ENSP00000428359,ENSP00000431034,ENSP00000384747,ENSP00000428090,ENSP00000429576,ENSP00000285896,ENSP00000429310,ENSP00000428305,ENSP00000429882,ENSP00000429810,ENSP00000430833,ENSP00000428842,ENSP00000428600,ENSP00000429394,ENSP00000428576"
CNPY1	-0.69677	0.11441	-1.50726	0.00320302	-1.50726	0.00317009	PH_hs_0061873	Homo sapiens canopy FGF signaling regulator 1 (CNPY1)	1	285888	NM_001103176	NP_001096646.1	ENSG00000146910	"ENST00000406197,ENST00000321736"	"ENSP00000384514,ENSP00000317439"
CNPY1	-0.69677	0.11441	-1.50726	0.00320302	-1.50726	0.00317009	PH_hs_0061873	Homo sapiens canopy FGF signaling regulator 1 (CNPY1)	1	285888	NM_001103176	NP_001096646.1	ENSG00000146910	"ENST00000406197,ENST00000321736"	"ENSP00000384514,ENSP00000317439"
CNRIP1	-0.327411	0.0416984	-0.0140305	0.965807	-0.35543	0.392543	PH_hs_0045998	Homo sapiens cannabinoid receptor interacting protein 1 (CNRIP1)	1	25927	"NM_001111101,NM_015463"	"NP_001104571.1,NP_056278.1"	ENSG00000119865	"ENST00000409559,ENST00000263655,ENST00000481714,ENST00000409862"	"ENSP00000386883,ENSP00000263655,ENSP00000386544"
CNST	0.440377	0.154994	-0.0777656	0.8447	-0.345653	0.0415184	PH_hs_0014992	"Homo sapiens consortin, connexin sorting protein (CNST)"	1	163882	NM_152609	NP_689822.2	ENSG00000162852	"ENST00000483271,ENST00000366513,ENST00000366512,ENST00000366511"	"ENSP00000355470,ENSP00000355469,ENSP00000355468"
CNTFR	-0.264984	0.681662	-0.469329	0.0492103	0.793666	0.011246	PH_hs_0011526	Homo sapiens ciliary neurotrophic factor receptor (CNTFR)	1	1271	"NM_001207011,NM_147164,NM_001842"	"NP_001193940.1,NP_671693.1,NP_001833.1"	ENSG00000122756	"ENST00000351266,ENST00000378980,ENST00000417345,ENST00000610543"	"ENSP00000242338,ENSP00000368265,ENSP00000388082,ENSP00000480451"
CNTFR	-0.264984	0.681662	-0.469329	0.0492103	0.793666	0.011246	PH_hs_0011526	Homo sapiens ciliary neurotrophic factor receptor (CNTFR)	1	1271	"NM_001207011,NM_147164,NM_001842"	"NP_001193940.1,NP_671693.1,NP_001833.1"	ENSG00000122756	"ENST00000351266,ENST00000378980,ENST00000417345,ENST00000610543"	"ENSP00000242338,ENSP00000368265,ENSP00000388082,ENSP00000480451"
CNTFR-AS1	-0.0677534	0.68992	0.431757	0.053878	-0.568374	0.430668	PH_hs_0008845	Homo sapiens CNTFR antisense RNA 1 (CNTFR-AS1)	1	415056	NR_024369	-	NA	NA	NA
CNTN3	-0.469864	0.177081	-1.55888	0.0108468	-0.37064	0.48555	PH_hs_0026757	Homo sapiens contactin 3 (plasmacytoma associated)	1	5067	NM_020872	NP_065923.1	ENSG00000113805	"ENST00000263665,ENST00000477856"	ENSP00000263665
CNTN5	-0.84228	0.248126	-2.33429	0.0435587	-0.931126	0.227606	PH_hs_0060433	Homo sapiens contactin 5 (CNTN5)	1	53942	NM_001243271	NP_001230200.1	ENSG00000149972	"ENST00000525047,ENST00000528727,ENST00000527185,ENST00000528682,ENST00000524871,ENST00000418526,ENST00000530458,ENST00000525236,ENST00000527682,ENST00000524560,ENST00000619298,ENST00000279463"	"ENSP00000433575,ENSP00000436185,ENSP00000435637,ENSP00000393229,ENSP00000478120,ENSP00000279463"
CNTNAP3	-0.0958423	0.666777	0.526494	0.0695212	-1.44179	0.0231294	PH_hs_0062172	Homo sapiens contactin associated protein-like 3 (CNTNAP3)	1	79937	NM_033655	NP_387504.2	ENSG00000276386	ENST00000617175
CNTNAP5	-0.214753	0.554693	-0.697605	0.224945	-1.38477	0.0406979	PH_hs_0025609	Homo sapiens contactin associated protein-like 5 (CNTNAP5)	1	129684	NM_130773	NP_570129.1	ENSG00000155052	"ENST00000423939,ENST00000431078,ENST00000470921"	ENSP00000399013
COBL	-0.211962	0.36195	-0.609597	0.0204479	-0.376898	0.13036	PH_hs_0022238	Homo sapiens cordon-bleu WH2 repeat protein (COBL)	1	23242	NM_015198	NP_056013.2	ENSG00000106078	"ENST00000431948,ENST00000445054,ENST00000265136,ENST00000462395,ENST00000452534,ENST00000395540,ENST00000441453,ENST00000632460,ENST00000449281,ENST00000395542"	"ENSP00000413498,ENSP00000401204,ENSP00000265136,ENSP00000405059,ENSP00000378910,ENSP00000399500,ENSP00000488001,ENSP00000391864,ENSP00000378912"
COL11A1	-0.412282	0.0902113	-0.594639	0.0024494	-0.594639	0.00188314	PH_hs_0025731	"Homo sapiens collagen, type XI, alpha 1 (COL11A1)"	1	1301	"NM_001190709,NM_080630,NM_080629,NM_001854"	"NP_001177638.1,NP_542197.3,NP_542196.2,NP_001845.3"	ENSG00000060718	"ENST00000370096,ENST00000470170,ENST00000512756,ENST00000465209,ENST00000461720,ENST00000475980,ENST00000427239,ENST00000447608,ENST00000353414,ENST00000358392"	"ENSP00000359114,ENSP00000426533,ENSP00000408640,ENSP00000410177,ENSP00000302551,ENSP00000351163"
COL11A1	-0.412282	0.0902113	-0.594639	0.0024494	-0.594639	0.00188314	PH_hs_0025731	"Homo sapiens collagen, type XI, alpha 1 (COL11A1)"	1	1301	"NM_001190709,NM_080630,NM_080629,NM_001854"	"NP_001177638.1,NP_542197.3,NP_542196.2,NP_001845.3"	ENSG00000060718	"ENST00000370096,ENST00000470170,ENST00000512756,ENST00000465209,ENST00000461720,ENST00000475980,ENST00000427239,ENST00000447608,ENST00000353414,ENST00000358392"	"ENSP00000359114,ENSP00000426533,ENSP00000408640,ENSP00000410177,ENSP00000302551,ENSP00000351163"
COL14A1	0.00737224	0.978016	0.263346	0.324363	-2.1154	0.0506958	PH_hs_0047293	"Homo sapiens collagen, type XIV, alpha 1 (COL14A1)"	1	7373	NM_021110	NP_066933.1	ENSG00000187955	"ENST00000498051,ENST00000309791,ENST00000297848,ENST00000432943,ENST00000523142,ENST00000434620,ENST00000440844,ENST00000247781,ENST00000537875"	"ENSP00000428851,ENSP00000311809,ENSP00000297848,ENSP00000429123,ENSP00000409461,ENSP00000403640,ENSP00000247781,ENSP00000443974"
COL18A1-AS1	-0.245895	0.110308	-0.476282	0.0867592	-0.676232	0.0033546	PH_hs_0034436	Homo sapiens COL18A1 antisense RNA 1 (COL18A1-AS1)	1	378832	"NR_028082,NR_027498"	"-,-"	ENSG00000183535	"ENST00000397787,ENST00000485206"
COL1A1	0.102788	0.605228	0.505237	0.0510421	0.430451	0.111765	PH_hs_0010359	"Homo sapiens collagen, type I, alpha 1 (COL1A1)"	1	1277	NM_000088	NP_000079.2	ENSG00000108821	"ENST00000225964,ENST00000510710,ENST00000486572,ENST00000511732,ENST00000494334,ENST00000476387,ENST00000504289,ENST00000463440,ENST00000471344,ENST00000485870,ENST00000495677,ENST00000474644,ENST00000507689"	"ENSP00000225964,ENSP00000460459"
COL20A1	0.21234	0.228113	0.279442	0.117789	0.379735	0.0537389	PH_hs_0035732	"Homo sapiens collagen, type XX, alpha 1 (COL20A1)"	1	57642	NM_020882	NP_065933.2	ENSG00000101203	"ENST00000358894,ENST00000479501,ENST00000422202,ENST00000415763,ENST00000455906,ENST00000471582,ENST00000494913,ENST00000496810"	"ENSP00000351767,ENSP00000414753,ENSP00000410799,ENSP00000406345"
COL23A1	-0.0910915	0.801109	-1.18832	0.0130058	-0.343344	0.666649	PH_hs_0024949	"Homo sapiens collagen, type XXIII, alpha 1 (COL23A1)"	1	91522	NM_173465	NP_775736.2	ENSG00000050767	"ENST00000390654,ENST00000484750,ENST00000407622"	"ENSP00000375069,ENSP00000385092"
COL25A1	-0.128086	0.473752	0.644079	0.0146311	0.412785	0.612445	PH_hs_0026870	"Homo sapiens collagen, type XXV, alpha 1 (COL25A1)"	1	84570	"NM_001256074,NM_032518"	"NP_001243003.1,NP_115907.2"	ENSG00000188517	"ENST00000494183,ENST00000512961,ENST00000399132,ENST00000399127,ENST00000399126,ENST00000505377,ENST00000505591,ENST00000610288,ENST00000622134"	"ENSP00000437131,ENSP00000426841,ENSP00000382083,ENSP00000382078,ENSP00000382077,ENSP00000422266,ENSP00000482699,ENSP00000484110"
COL2A1	0.193122	0.563611	0.138378	0.337613	0.956855	0.0154787	PH_hs_0024730	"Homo sapiens collagen, type II, alpha 1 (COL2A1)"	1	1280	"NM_001844,NM_033150"	"NP_001835.3,NP_149162.2"	ENSG00000139219	"ENST00000380518,ENST00000493991,ENST00000337299,ENST00000546974,ENST00000483376,ENST00000474996,ENST00000466884,ENST00000490609,ENST00000465743"	"ENSP00000369889,ENSP00000338213"
COL6A2	0.0434479	0.867594	-0.753567	0.608089	0.735735	0.0348732	PH_hs_0035939	"Homo sapiens collagen, type VI, alpha 2 (COL6A2)"	1	1292	"NM_058175,NM_058174"	"NP_478055.2,NP_478054.2"	ENSG00000142173	"ENST00000300527,ENST00000436769,ENST00000409416,ENST00000397763,ENST00000460886,ENST00000485591,ENST00000413758,ENST00000310645"	"ENSP00000300527,ENSP00000390418,ENSP00000387115,ENSP00000380870,ENSP00000395751,ENSP00000312529"
COL8A2	0.213343	0.0964344	0.421518	0.0476781	-0.235209	0.455069	PH_hs_0017115	"Homo sapiens collagen, type VIII, alpha 2 (COL8A2)"	1	1296	NM_005202	NP_005193.1	ENSG00000171812	"ENST00000303143,ENST00000397799,ENST00000481785,ENST00000615990"	"ENSP00000305913,ENSP00000380901,ENSP00000436433,ENSP00000484406"
COLEC11	0.268048	0.597202	0.519458	0.0197621	0.0880439	0.730664	PH_hs_0002751	Homo sapiens collectin sub-family member 11 (COLEC11)	1	78989	"NM_001255986,NM_001255989,NM_001255988,NM_001255987,NM_001255985,NM_001255984,NM_001255983,NM_001255982,NM_199235,NM_024027,NR_045659"	"NP_001242915.1,NP_001242918.1,NP_001242917.1,NP_001242916.1,NP_001242914.1,NP_001242913.1,NP_001242912.1,NP_001242911.1,NP_954705.1,NP_076932.1,-"	ENSG00000118004	"ENST00000419002,ENST00000487365,ENST00000460971,ENST00000236693,ENST00000349077,ENST00000416132,ENST00000438814,ENST00000403096,ENST00000402794,ENST00000404205,ENST00000402922,ENST00000382062,ENST00000418971"	"ENSP00000236693,ENSP00000339168,ENSP00000410919,ENSP00000393167,ENSP00000385130,ENSP00000384882,ENSP00000385827,ENSP00000385653,ENSP00000371494,ENSP00000411770"
COMMD6	-0.219354	0.462251	-0.116274	0.589776	0.56934	0.00290821	PH_hs_0049425	Homo sapiens COMM domain containing 6 (COMMD6)	1	170622	"NM_203497,NM_203495"	"NP_987093.1,NP_987091.1"	ENSG00000188243	"ENST00000377615,ENST00000483290,ENST00000377619,ENST00000486516,ENST00000497707,ENST00000355801,ENST00000377612,ENST00000460675,ENST00000464050,ENST00000477377,ENST00000471682,ENST00000406936,ENST00000626103"	"ENSP00000366841,ENSP00000366845,ENSP00000348054,ENSP00000366838,ENSP00000385660,ENSP00000485825"
COMP	-0.16383	0.477896	-0.655234	0.228631	-1.07601	0.00789425	PH_hs_0027533	Homo sapiens cartilage oligomeric matrix protein (COMP)	1	1311	NM_000095	NP_000086.2	ENSG00000105664	"ENST00000542601,ENST00000222271,ENST00000425807,ENST00000612179"	"ENSP00000439156,ENSP00000222271,ENSP00000403792"
COQ2	0.244368	0.0479608	0.0318416	0.828549	-0.166338	0.0891798	PH_hs_0022584	Homo sapiens coenzyme Q2 4-hydroxybenzoate polyprenyltransferase (COQ2)	1	27235	NM_015697	NP_056512.5	ENSG00000173085	"ENST00000503391,ENST00000503915,ENST00000311469,ENST00000311461,ENST00000514935"	"ENSP00000426242,ENSP00000427146,ENSP00000310873,ENSP00000311835"
CORT|APITD1-CORT	-0.348287	0.0172044	-0.109549	0.243439	0.0332702	0.713159	PH_hs_0024898	Homo sapiens cortistatin (CORT)|Homo sapiens APITD1-CORT readthrough (APITD1-CORT)	4	1325|100526739	"NM_001302|NM_001270517,NM_198544,NM_001243768,NM_199006,NR_037187"	"NP_001293.3|NP_001257446.1,NP_940946.1,NP_001230697.1,NP_950171.2,-"	ENSG00000241563|ENSG00000251503	"ENST00000377049|ENST00000400900,ENST00000470413,ENST00000465026,ENST00000602446,ENST00000602296,ENST00000602787"	"ENSP00000366248|ENSP00000383692,ENSP00000433615,ENSP00000473279,ENSP00000473401,ENSP00000473509"
COX15	-0.284308	0.155976	-0.227648	0.0443381	-0.0432407	0.507396	PH_hs_0032234	Homo sapiens cytochrome c oxidase assembly homolog 15 (yeast)	1	1355	"NM_004376,NM_078470"	"NP_004367.2,NP_510870.1"	ENSG00000014919	"ENST00000370483,ENST00000016171,ENST00000497381"	"ENSP00000359514,ENSP00000016171"
COX18	-0.235685	0.503801	-0.81951	0.307136	-1.22638	0.0029411	PH_hs_0049114	Homo sapiens COX18 cytochrome c oxidase assembly factor (COX18)	1	285521	NM_173827	NP_776188.1	ENSG00000163626	"ENST00000295890,ENST00000449739,ENST00000507544,ENST00000510031,ENST00000421792"	"ENSP00000295890,ENSP00000394583,ENSP00000425261,ENSP00000424978"
COX6B2	0.10917	0.238895	0.289646	0.451005	0.484829	0.0379581	PH_hs_0032685	Homo sapiens cytochrome c oxidase subunit VIb polypeptide 2 (testis)	1	125965	NM_144613	NP_653214.2	ENSG00000160471	"ENST00000588572,ENST00000326529,ENST00000593184,ENST00000590900,ENST00000589879,ENST00000588586,ENST00000586191,ENST00000589467,ENST00000587357,ENST00000587854"	"ENSP00000467959,ENSP00000320672,ENSP00000467266,ENSP00000467128,ENSP00000476768"
CP	-0.637872	0.0949947	-1.29028	0.000636941	-0.73729	0.25644	PH_hs_0049260	Homo sapiens ceruloplasmin (ferroxidase)	1	1356	NM_000096	NP_000087.1	ENSG00000047457	"ENST00000481169,ENST00000479771,ENST00000460674,ENST00000264613,ENST00000494544,ENST00000474204,ENST00000473296,ENST00000463556,ENST00000490639,ENST00000497902,ENST00000462336,ENST00000489736,ENST00000497797,ENST00000471356,ENST00000455472"	"ENSP00000418773,ENSP00000420367,ENSP00000264613,ENSP00000420545,ENSP00000426888"
CPAMD8	-0.220042	0.656181	0.805955	0.153565	1.19619	0.0126565	PH_hs_0018243	"Homo sapiens C3 and PZP-like, alpha-2-macroglobulin domain containing 8 (CPAMD8)"	1	27151	NM_015692	NP_056507.2	ENSG00000160111	"ENST00000443236,ENST00000594249,ENST00000600235,ENST00000596224,ENST00000597335,ENST00000602132,ENST00000598547,ENST00000598792,ENST00000601782,ENST00000597709,ENST00000598104,ENST00000596572,ENST00000593739,ENST00000599287,ENST00000595323,ENST00000593420,ENST00000602159,ENST00000291440,ENST00000601637,ENST00000388925"	"ENSP00000402505,ENSP00000471545,ENSP00000473216,ENSP00000469163,ENSP00000291440,ENSP00000373577"
CPEB3	-0.517121	0.0166308	0.113862	0.775026	0.280863	0.0330305	PH_hs_0031731	Homo sapiens cytoplasmic polyadenylation element binding protein 3 (CPEB3)	1	22849	"NM_001178137,NM_014912"	"NP_001171608.1,NP_055727.3"	ENSG00000107864	"ENST00000412050,ENST00000265997,ENST00000614585"	"ENSP00000398310,ENSP00000265997,ENSP00000482128"
CPEB3	-0.517121	0.0166308	0.113862	0.775026	0.280863	0.0330305	PH_hs_0031731	Homo sapiens cytoplasmic polyadenylation element binding protein 3 (CPEB3)	1	22849	"NM_001178137,NM_014912"	"NP_001171608.1,NP_055727.3"	ENSG00000107864	"ENST00000412050,ENST00000265997,ENST00000614585"	"ENSP00000398310,ENSP00000265997,ENSP00000482128"
CPNE2	0.0935417	0.400196	0.362899	0.0321031	0.431089	0.00913705	PH_hs_0016597	Homo sapiens copine II (CPNE2)	1	221184	NM_152727	NP_689940.3	ENSG00000140848	"ENST00000290776,ENST00000535318,ENST00000566259,ENST00000565874,ENST00000567487,ENST00000565766,ENST00000566042,ENST00000565951,ENST00000566910,ENST00000567011"	"ENSP00000290776,ENSP00000439018,ENSP00000455883,ENSP00000456042,ENSP00000455443,ENSP00000457579"
CPNE2	0.0935417	0.400196	0.362899	0.0321031	0.431089	0.00913705	PH_hs_0016597	Homo sapiens copine II (CPNE2)	1	221184	NM_152727	NP_689940.3	ENSG00000140848	"ENST00000290776,ENST00000535318,ENST00000566259,ENST00000565874,ENST00000567487,ENST00000565766,ENST00000566042,ENST00000565951,ENST00000566910,ENST00000567011"	"ENSP00000290776,ENSP00000439018,ENSP00000455883,ENSP00000456042,ENSP00000455443,ENSP00000457579"
CPNE4	0.158759	0.510232	0.570895	0.101299	0.426628	0.034103	PH_hs_0063653	Homo sapiens copine IV (CPNE4)	1	131034	NM_130808	NP_570720.1	ENSG00000196353	"ENST00000514439,ENST00000512055,ENST00000515418,ENST00000503204,ENST00000512332,ENST00000511604,ENST00000502818,ENST00000505881,ENST00000514999,ENST00000505957,ENST00000506687,ENST00000505331,ENST00000617767,ENST00000429747"	"ENSP00000421705,ENSP00000424853,ENSP00000423811,ENSP00000421646,ENSP00000425506,ENSP00000427561,ENSP00000421394,ENSP00000478878,ENSP00000411904"
CPPED1	-0.168947	0.118108	-0.300762	0.0193733	-0.23421	0.115083	PH_hs_0022973	Homo sapiens calcineurin-like phosphoesterase domain containing 1 (CPPED1)	1	55313	"NM_018340,NM_001099455"	"NP_060810.2,NP_001092925.1"	ENSG00000103381	"ENST00000381774,ENST00000433677,ENST00000261660,ENST00000539677"	"ENSP00000371193,ENSP00000411127,ENSP00000261660"
CPSF4L	-0.0393227	0.868841	-0.669295	0.0122076	-0.669295	0.0116792	PH_hs_0034981	Homo sapiens cleavage and polyadenylation specific factor 4-like (CPSF4L)	1	642843	NM_001129885	NP_001123357.1	ENSG00000187959	"ENST00000344935,ENST00000397671"	"ENSP00000343900,ENSP00000380788"
CPSF4L	-0.0393227	0.868841	-0.669295	0.0122076	-0.669295	0.0116792	PH_hs_0034981	Homo sapiens cleavage and polyadenylation specific factor 4-like (CPSF4L)	1	642843	NM_001129885	NP_001123357.1	ENSG00000187959	"ENST00000344935,ENST00000397671"	"ENSP00000343900,ENSP00000380788"
CPSF7	-0.113862	0.408381	-0.297061	0.102874	-0.437531	0.034477	PH_hs_0025976	"Homo sapiens cleavage and polyadenylation specific factor 7, 59kDa (CPSF7)"	1	79869	"NM_001142565,NM_001136040,NM_024811"	"NP_001136037.1,NP_001129512.1,NP_079087.3"	ENSG00000149532	"ENST00000340437,ENST00000394888,ENST00000439958,ENST00000494016,ENST00000448745,ENST00000537641,ENST00000477890,ENST00000544669,ENST00000539952,ENST00000535222,ENST00000544990,ENST00000544585,ENST00000413232,ENST00000537162,ENST00000543545,ENST00000541963,ENST00000536548,ENST00000450000,ENST00000449811,ENST00000413184,ENST00000536145,ENST00000545934,ENST00000463244,ENST00000489728,ENST0000047468…	"ENSP00000345412,ENSP00000378352,ENSP00000397203,ENSP00000407394,ENSP00000437860,ENSP00000438381,ENSP00000446193,ENSP00000440414,ENSP00000437531,ENSP00000393828,ENSP00000442819,ENSP00000443504,ENSP00000446330,ENSP00000437467,ENSP00000391359,ENSP00000392400,ENSP00000414295,ENSP00000437768,ENSP00000487286"
CPTP	-0.0347726	0.867895	0.355358	0.0302685	0.340068	0.0828188	PH_hs_0030743	Homo sapiens ceramide-1-phosphate transfer protein (CPTP)	1	80772	NM_001029885	NP_001025056.1	ENSG00000224051	"ENST00000464957,ENST00000343938,ENST00000488011"	"ENSP00000343890,ENSP00000462636"
CPXM2	0.0811299	0.331715	-0.347936	0.0156151	-0.313983	0.504601	PH_hs_0024372	Homo sapiens carboxypeptidase X (M14 family)	1	119587	NM_198148	NP_937791.2	ENSG00000121898	"ENST00000368854,ENST00000241305,ENST00000481775,ENST00000615851"	"ENSP00000241305,ENSP00000483180"
CR1	0.899423	0.0244724	0.00854523	0.966463	-0.127572	0.580569	PH_hs_0045571	Homo sapiens complement component (3b/4b)	1	1378	"NM_000651,NM_000573"	"NP_000642.3,NP_000564.2"	ENSG00000203710	"ENST00000367050,ENST00000367051,ENST00000367053,ENST00000367052,ENST00000400960,ENST00000530487,ENST00000534202,ENST00000367049,ENST00000434033,ENST00000450439,ENST00000436595,ENST00000529814"	"ENSP00000356018,ENSP00000356020,ENSP00000356019,ENSP00000383744,ENSP00000436139,ENSP00000356016,ENSP00000434718"
CRACR2A	-0.193587	0.257287	-0.0175244	0.96039	-0.438703	0.0211807	PH_hs_0023508	Homo sapiens calcium release activated channel regulator 2A (CRACR2A)	1	84766	NM_032680	NP_116069.1	ENSG00000130038	"ENST00000333750,ENST00000440314,ENST00000535292,ENST00000252322,ENST00000514026,ENST00000535507"	"ENSP00000331047,ENSP00000409382,ENSP00000438777,ENSP00000252322"
CRB1	0.299923	0.110366	0.613688	0.0302683	0.347035	0.129525	PH_hs_0021449	"Homo sapiens crumbs family member 1, photoreceptor morphogenesis associated (CRB1)"	1	23418	"NM_001257966,NM_001257965,NM_001193640,NM_201253,NR_047563,NR_047564"	"NP_001244895.1,NP_001244894.1,NP_001180569.1,NP_957705.1,-,-"	ENSG00000134376	"ENST00000475659,ENST00000484075,ENST00000367400,ENST00000367399,ENST00000476483,ENST00000367397,ENST00000480086,ENST00000448952,ENST00000538660,ENST00000535699"	"ENSP00000433932,ENSP00000356370,ENSP00000356369,ENSP00000356367,ENSP00000395407,ENSP00000438091,ENSP00000438786"
CRB2	-0.360725	0.630901	0.421493	0.234451	0.665782	0.0480904	PH_hs_0038563	Homo sapiens crumbs family member 2 (CRB2)	1	286204	NM_173689	NP_775960.4	ENSG00000148204	"ENST00000359999,ENST00000373631,ENST00000460253"	"ENSP00000353092,ENSP00000362734,ENSP00000435279"
CREBBP	-0.241691	0.0408311	-0.189564	0.23368	-0.24159	0.0225982	PH_hs_0048605	Homo sapiens CREB binding protein (CREBBP)	1	1387	"NM_001079846,NM_004380"	"NP_001073315.1,NP_004371.2"	ENSG00000005339	"ENST00000262367,ENST00000382070,ENST00000571763,ENST00000576720,ENST00000574740,ENST00000573517,ENST00000570939,ENST00000572569,ENST00000573672,ENST00000571826,ENST00000572134,ENST00000575237"	"ENSP00000262367,ENSP00000371502,ENSP00000460474,ENSP00000461002,ENSP00000459490,ENSP00000458254"
CREBBP	-0.241691	0.0408311	-0.189564	0.23368	-0.24159	0.0225982	PH_hs_0048605	Homo sapiens CREB binding protein (CREBBP)	1	1387	"NM_001079846,NM_004380"	"NP_001073315.1,NP_004371.2"	ENSG00000005339	"ENST00000262367,ENST00000382070,ENST00000571763,ENST00000576720,ENST00000574740,ENST00000573517,ENST00000570939,ENST00000572569,ENST00000573672,ENST00000571826,ENST00000572134,ENST00000575237"	"ENSP00000262367,ENSP00000371502,ENSP00000460474,ENSP00000461002,ENSP00000459490,ENSP00000458254"
CREG2	-0.222259	0.149996	0.396112	0.0255766	0.123387	0.787614	PH_hs_0022083	Homo sapiens cellular repressor of E1A-stimulated genes 2 (CREG2)	1	200407	NM_153836	NP_722578.1	ENSG00000175874	"ENST00000324768,ENST00000495455,ENST00000486966"	ENSP00000315203
CRELD2	-0.315774	0.197548	-0.230093	0.0491301	0.00168369	0.984721	PH_hs_0002461	Homo sapiens cysteine-rich with EGF-like domains 2 (CRELD2)	1	79174	"NM_024324,NM_001135101"	"NP_077300.3,NP_001128573.1"	ENSG00000184164	"ENST00000450207,ENST00000404488,ENST00000328268,ENST00000483652,ENST00000407217,ENST00000403427,ENST00000482956,ENST00000498354,ENST00000462253,ENST00000444954,ENST00000487969"	"ENSP00000387769,ENSP00000383938,ENSP00000332223,ENSP00000386034,ENSP00000384111"
CRHR2	-0.0897642	0.6548	0.351641	0.294945	0.42088	0.021097	PH_hs_0004056	Homo sapiens corticotropin releasing hormone receptor 2 (CRHR2)	1	1395	"NM_001202481,NM_001202475,NM_001202483,NM_001202482,NM_001883"	"NP_001189410.1,NP_001189404.1,NP_001189412.1,NP_001189411.1,NP_001874.2"	ENSG00000106113	"ENST00000471646,ENST00000452278,ENST00000348438,ENST00000445981,ENST00000423776,ENST00000462882,ENST00000341843,ENST00000506074"	"ENSP00000418722,ENSP00000401930,ENSP00000340943,ENSP00000401241,ENSP00000416620,ENSP00000344304,ENSP00000426498"
CRISP3	0.557108	0.0272068	-0.36593	0.372347	-0.478396	0.482999	PH_hs_0061609	Homo sapiens cysteine-rich secretory protein 3 (CRISP3)	1	10321	"NM_001190986,NM_006061"	"NP_001177915.1,NP_006052.2"	ENSG00000096006	"ENST00000263045,ENST00000371159,ENST00000354620,ENST00000433368"	"ENSP00000263045,ENSP00000360201,ENSP00000346636,ENSP00000389026"
CRMP1	-0.275017	0.487039	-0.688726	0.425188	-1.50547	0.00675567	PH_hs_0009357	Homo sapiens collapsin response mediator protein 1 (CRMP1)	1	1400	"NM_001014809,NM_001313"	"NP_001014809.1,NP_001304.1"	ENSG00000072832	"ENST00000506216,ENST00000324989,ENST00000397890,ENST00000513911,ENST00000511535,ENST00000512574"	"ENSP00000321606,ENSP00000380987,ENSP00000425742"
CRTC1	-0.332569	0.273747	-0.0811694	0.818772	-0.370192	0.00727726	PH_hs_0000609	Homo sapiens CREB regulated transcription coactivator 1 (CRTC1)	1	23373	"NM_001098482,NM_015321"	"NP_001091952.1,NP_056136.2"	ENSG00000105662	"ENST00000321949,ENST00000338797,ENST00000594658,ENST00000601916"	"ENSP00000323332,ENSP00000345001,ENSP00000468893,ENSP00000469285"
CRYBB1	0.0658194	0.65819	-0.0756041	0.766236	-0.314883	0.0384572	PH_hs_0002941	"Homo sapiens crystallin, beta B1 (CRYBB1)"	1	1414	NM_001887	NP_001878.1	ENSG00000100122	ENST00000215939	ENSP00000215939
CRYBG3	-0.204662	0.13822	-0.268932	0.0302409	-0.0310117	0.870781	PH_hs_0047927	Homo sapiens beta-gamma crystallin domain containing 3 (CRYBG3)	1	131544	NM_153605	NP_705833.3	ENSG00000080200	"ENST00000389622,ENST00000495403,ENST00000485253"	"ENSP00000374273,ENSP00000418420"
CRYGD	-0.0471731	0.927911	0.0363925	0.941884	-0.484269	0.0300299	PH_hs_0027827	"Homo sapiens crystallin, gamma D (CRYGD)"	1	1421	NM_006891	NP_008822.2	ENSG00000118231	ENST00000264376	ENSP00000264376
CSDC2	-0.0338671	0.853734	0.487044	0.0445967	-0.0249156	0.946719	PH_hs_0005932	"Homo sapiens cold shock domain containing C2, RNA binding (CSDC2)"	1	27254	NM_014460	NP_055275.1	ENSG00000172346	"ENST00000306149,ENST00000460790"	"ENSP00000302485,ENSP00000417127"
CSF1	-0.227967	0.762031	-2.05164	0.00915272	-1.43241	0.0181473	PH_hs_0010421	Homo sapiens colony stimulating factor 1 (macrophage)	1	1435	"NM_172211,NM_000757"	"NP_757350.1,NP_000748.3"	ENSG00000184371	"ENST00000527192,ENST00000525659,ENST00000357302,ENST00000329608,ENST00000488198,ENST00000369802,ENST00000420111,ENST00000369801,ENST00000526001"	"ENSP00000434527,ENSP00000431547,ENSP00000349854,ENSP00000327513,ENSP00000433837,ENSP00000358817,ENSP00000407317,ENSP00000358816"
CSF1	-0.227967	0.762031	-2.05164	0.00915272	-1.43241	0.0181473	PH_hs_0010421	Homo sapiens colony stimulating factor 1 (macrophage)	1	1435	"NM_172211,NM_000757"	"NP_757350.1,NP_000748.3"	ENSG00000184371	"ENST00000527192,ENST00000525659,ENST00000357302,ENST00000329608,ENST00000488198,ENST00000369802,ENST00000420111,ENST00000369801,ENST00000526001"	"ENSP00000434527,ENSP00000431547,ENSP00000349854,ENSP00000327513,ENSP00000433837,ENSP00000358817,ENSP00000407317,ENSP00000358816"
CSF1	-0.0735549	0.77304	0.525653	0.00512656	-0.0244652	0.956566	PH_hs_0061746	Homo sapiens colony stimulating factor 1 (macrophage)	1	1435	"NM_172211,NM_000757"	"NP_757350.1,NP_000748.3"	ENSG00000184371	"ENST00000527192,ENST00000525659,ENST00000357302,ENST00000329608,ENST00000488198,ENST00000369802,ENST00000420111,ENST00000369801,ENST00000526001"	"ENSP00000434527,ENSP00000431547,ENSP00000349854,ENSP00000327513,ENSP00000433837,ENSP00000358817,ENSP00000407317,ENSP00000358816"
CSF1R	0.104917	0.241024	-0.252445	0.180022	-0.235707	0.0379456	PH_hs_0010440	Homo sapiens colony stimulating factor 1 receptor (CSF1R)	1	1436	NM_005211	NP_005202.2	ENSG00000182578	"ENST00000504875,ENST00000286301,ENST00000509861,ENST00000515068,ENST00000515239,ENST00000513609,ENST00000502660,ENST00000511344,ENST00000543093"	"ENSP00000422212,ENSP00000286301,ENSP00000427545,ENSP00000421174,ENSP00000445282"
CSF2RA	0.248586	0.0364853	-0.00962886	0.96036	-0.17722	0.0805161	PH_hs_0028661	"Homo sapiens colony stimulating factor 2 receptor, alpha, low-affinity (granulocyte-macrophage)"	1	1438	"NM_001161532,NM_001161530,NM_001161529,NM_172249,NM_172247,NM_172246,NM_172245,NM_006140,NR_027760"	"NP_001155004.1,NP_001155002.1,NP_001155001.1,NP_758452.1,NP_758450.1,NP_758449.1,NP_758448.1,NP_006131.2,-"	ENSG00000198223	"ENST00000381529,ENST00000381524,ENST00000493312,ENST00000412290,ENST00000419094,ENST00000381509,ENST00000494969,ENST00000481245,ENST00000355805,ENST00000486791,ENST00000355432,ENST00000381500,ENST00000477940,ENST00000478256,ENST00000475259,ENST00000491683,ENST00000498153,ENST00000501036,ENST00000417535,ENST00000432318"	"ENSP00000370940,ENSP00000370935,ENSP00000410667,ENSP00000397452,ENSP00000370920,ENSP00000476684,ENSP00000348058,ENSP00000436825,ENSP00000347606,ENSP00000370911,ENSP00000440491,ENSP00000394227,ENSP00000416437"
CSGALNACT2	0.598927	0.0713944	-0.203449	0.299047	-0.323444	0.0378712	PH_hs_0038464	Homo sapiens chondroitin sulfate N-acetylgalactosaminyltransferase 2 (CSGALNACT2)	1	55454	NM_018590	NP_061060.3	ENSG00000169826	ENST00000374466	ENSP00000363590
CSMD2	-1.50623	0.0110054	-1.5862	0.484454	-0.113825	0.811651	PH_hs_0029282	Homo sapiens CUB and Sushi multiple domains 2 (CSMD2)	1	114784	NM_052896	NP_443128.2	ENSG00000121904	"ENST00000241312,ENST00000465819,ENST00000373380,ENST00000489419,ENST00000373377,ENST00000338325,ENST00000471438,ENST00000373388,ENST00000373381,ENST00000619121"	"ENSP00000241312,ENSP00000362478,ENSP00000362475,ENSP00000340311,ENSP00000362486,ENSP00000362479,ENSP00000483463"
CSNK1G1	-0.0484864	0.732584	0.446087	0.0745942	0.495251	0.0214887	PH_hs_0049185	"Homo sapiens casein kinase 1, gamma 1 (CSNK1G1)"	1	53944	NM_022048	NP_071331.2	ENSG00000169118	"ENST00000303052,ENST00000607537,ENST00000606225"	"ENSP00000305777,ENSP00000475724,ENSP00000475325"
CSPG4	-0.132793	0.31301	-0.47872	0.0203279	-0.657161	0.00148685	PH_hs_0025491	Homo sapiens chondroitin sulfate proteoglycan 4 (CSPG4)	1	1464	NM_001897	NP_001888.2	ENSG00000173546	ENST00000308508	ENSP00000312506
CSPG4	-0.132793	0.31301	-0.47872	0.0203279	-0.657161	0.00148685	PH_hs_0025491	Homo sapiens chondroitin sulfate proteoglycan 4 (CSPG4)	1	1464	NM_001897	NP_001888.2	ENSG00000173546	ENST00000308508	ENSP00000312506
CSPP1	0.230238	0.12342	0.467768	0.0082362	0.358182	0.0146119	PH_hs_0040976	Homo sapiens centrosome and spindle pole associated protein 1 (CSPP1)	1	79848	NM_024790	NP_079066.5	ENSG00000104218	"ENST00000521919,ENST00000262210,ENST00000519701,ENST00000519163,ENST00000519668,ENST00000521168,ENST00000521324"	"ENSP00000429546,ENSP00000262210,ENSP00000428793,ENSP00000428694,ENSP00000430092"
CSPP1	0.230238	0.12342	0.467768	0.0082362	0.358182	0.0146119	PH_hs_0040976	Homo sapiens centrosome and spindle pole associated protein 1 (CSPP1)	1	79848	NM_024790	NP_079066.5	ENSG00000104218	"ENST00000521919,ENST00000262210,ENST00000519701,ENST00000519163,ENST00000519668,ENST00000521168,ENST00000521324"	"ENSP00000429546,ENSP00000262210,ENSP00000428793,ENSP00000428694,ENSP00000430092"
CSRNP2	0.142995	0.414561	-0.305604	0.0977175	-0.410983	0.0396853	PH_hs_0027588	Homo sapiens cysteine-serine-rich nuclear protein 2 (CSRNP2)	1	81566	"NM_030809,NR_045072"	"NP_110436.1,-"	ENSG00000110925	"ENST00000228515,ENST00000548206,ENST00000548981,ENST00000550533,ENST00000552899,ENST00000546935,ENST00000552680,ENST00000550461"	"ENSP00000228515,ENSP00000447983,ENSP00000447657,ENSP00000447065,ENSP00000449152"
CSRP2BP	-0.317883	0.104916	-0.240537	0.0472575	-0.111729	0.365331	PH_hs_0023065	Homo sapiens CSRP2 binding protein (CSRP2BP)	1	57325	"NM_020536,NR_028402"	"NP_065397.3,-"	ENSG00000149474	"ENST00000464792,ENST00000489422,ENST00000484001,ENST00000492286,ENST00000435364,ENST00000377681,ENST00000489634"	"ENSP00000424752,ENSP00000392318,ENSP00000366909,ENSP00000425909"
CSTF2T	0.0344088	0.863758	0.245589	0.0411872	0.266252	0.0332521	PH_hs_0047450	"Homo sapiens cleavage stimulation factor, 3' pre-RNA, subunit 2, 64kDa, tau variant (CSTF2T)"	1	23283	NM_015235	NP_056050.1	ENSG00000177613	ENST00000331173	ENSP00000332444
CSTF2T	0.0344088	0.863758	0.245589	0.0411872	0.266252	0.0332521	PH_hs_0047450	"Homo sapiens cleavage stimulation factor, 3' pre-RNA, subunit 2, 64kDa, tau variant (CSTF2T)"	1	23283	NM_015235	NP_056050.1	ENSG00000177613	ENST00000331173	ENSP00000332444
CTAG1B|CTAG1A|CTAG2	0.587237	0.0291618	0.706901	0.0370311	0.786452	0.0175868	PH_hs_0049587	Homo sapiens cancer/testis antigen 1B (CTAG1B)|Homo sapiens cancer/testis antigen 1A (CTAG1A)|Homo sapiens cancer/testis antigen 2 (CTAG2)	4	1485|246100|30848	"NM_001327|NM_139250|NM_020994,NM_172377"	"NP_001318.1|NP_640343.1|NP_066274.2,NP_758965.2"	ENSG00000184033|ENSG00000268651|ENSG00000126890	"ENST00000328435,ENST00000359887,ENST00000595485|ENST00000599837,ENST00000593606|ENST00000247306,ENST00000369585"	"ENSP00000332602,ENSP00000352953,ENSP00000469269|ENSP00000469441,ENSP00000472220|ENSP00000247306,ENSP00000358598"
CTAG1B|CTAG1A|CTAG2	0.587237	0.0291618	0.706901	0.0370311	0.786452	0.0175868	PH_hs_0049587	Homo sapiens cancer/testis antigen 1B (CTAG1B)|Homo sapiens cancer/testis antigen 1A (CTAG1A)|Homo sapiens cancer/testis antigen 2 (CTAG2)	4	1485|246100|30848	"NM_001327|NM_139250|NM_020994,NM_172377"	"NP_001318.1|NP_640343.1|NP_066274.2,NP_758965.2"	ENSG00000184033|ENSG00000268651|ENSG00000126890	"ENST00000328435,ENST00000359887,ENST00000595485|ENST00000599837,ENST00000593606|ENST00000247306,ENST00000369585"	"ENSP00000332602,ENSP00000352953,ENSP00000469269|ENSP00000469441,ENSP00000472220|ENSP00000247306,ENSP00000358598"
CTAG1B|CTAG1A|CTAG2	0.587237	0.0291618	0.706901	0.0370311	0.786452	0.0175868	PH_hs_0049587	Homo sapiens cancer/testis antigen 1B (CTAG1B)|Homo sapiens cancer/testis antigen 1A (CTAG1A)|Homo sapiens cancer/testis antigen 2 (CTAG2)	4	1485|246100|30848	"NM_001327|NM_139250|NM_020994,NM_172377"	"NP_001318.1|NP_640343.1|NP_066274.2,NP_758965.2"	ENSG00000184033|ENSG00000268651|ENSG00000126890	"ENST00000328435,ENST00000359887,ENST00000595485|ENST00000599837,ENST00000593606|ENST00000247306,ENST00000369585"	"ENSP00000332602,ENSP00000352953,ENSP00000469269|ENSP00000469441,ENSP00000472220|ENSP00000247306,ENSP00000358598"
CTAGE1	-0.975593	0.105609	-1.16788	0.127672	-1.76063	0.00213824	PH_hs_0019309	Homo sapiens cutaneous T-cell lymphoma-associated antigen 1 (CTAGE1)	1	64693	NM_172241	NP_758441.2	ENSG00000212710	"ENST00000525417,ENST00000391403"	"ENSP00000436900,ENSP00000375220"
CTAGE1	0.320626	0.0504747	0.594624	0.0178084	0.210335	0.218378	PH_hs_0060718	Homo sapiens cutaneous T-cell lymphoma-associated antigen 1 (CTAGE1)	1	64693	NM_172241	NP_758441.2	ENSG00000212710	"ENST00000525417,ENST00000391403"	"ENSP00000436900,ENSP00000375220"
CTAGE1	0.320626	0.0504747	0.594624	0.0178084	0.210335	0.218378	PH_hs_0060718	Homo sapiens cutaneous T-cell lymphoma-associated antigen 1 (CTAGE1)	1	64693	NM_172241	NP_758441.2	ENSG00000212710	"ENST00000525417,ENST00000391403"	"ENSP00000436900,ENSP00000375220"
CTAGE9|CTAGE15|CTAGE6|CTAGE8|CTAGE4	-0.15362	0.583522	-1.36706	0.0223127	-1.31374	0.0157643	PH_hs_0062747	"Homo sapiens CTAGE family, member 9 (CTAGE9)|Homo sapiens CTAGE family, member 15 (CTAGE15)|Homo sapiens CTAGE family, member 6 (CTAGE6)|Homo sapiens CTAGE family, member 8 (CTAGE8)|Homo sapiens CTAGE family, member 4 (CTAGE4)"	4	643854|441294|340307|100142659|100128553	NM_001145659|NM_001008747|NM_178561|NM_001278507|NM_198495	NP_001139131.1|NP_001008747.1|NP_848656.2|NP_001265436.1|NP_940897.2	ENSG00000236761|ENSG00000271079|ENSG00000271321|ENSG00000244693|ENSG00000225932	ENST00000314099|ENST00000420911|ENST00000470691|ENST00000487179|ENST00000486333	ENSP00000395587|ENSP00000474204|ENSP00000474388|ENSP00000417289|ENSP00000419539
CTAGE9|CTAGE15|CTAGE6|CTAGE8|CTAGE4	-0.15362	0.583522	-1.36706	0.0223127	-1.31374	0.0157643	PH_hs_0062747	"Homo sapiens CTAGE family, member 9 (CTAGE9)|Homo sapiens CTAGE family, member 15 (CTAGE15)|Homo sapiens CTAGE family, member 6 (CTAGE6)|Homo sapiens CTAGE family, member 8 (CTAGE8)|Homo sapiens CTAGE family, member 4 (CTAGE4)"	4	643854|441294|340307|100142659|100128553	NM_001145659|NM_001008747|NM_178561|NM_001278507|NM_198495	NP_001139131.1|NP_001008747.1|NP_848656.2|NP_001265436.1|NP_940897.2	ENSG00000236761|ENSG00000271079|ENSG00000271321|ENSG00000244693|ENSG00000225932	ENST00000314099|ENST00000420911|ENST00000470691|ENST00000487179|ENST00000486333	ENSP00000395587|ENSP00000474204|ENSP00000474388|ENSP00000417289|ENSP00000419539
CTDSP2	0.160297	0.642407	-0.646021	0.0701496	-1.27071	0.0229713	PH_hs_0028221	"Homo sapiens CTD (carboxy-terminal domain, RNA polymerase II, polypeptide A)"	1	10106	NM_005730	NP_005721.3	ENSG00000175215	"ENST00000398073,ENST00000548823,ENST00000547169,ENST00000549039,ENST00000547701,ENST00000551594,ENST00000550144,ENST00000552294,ENST00000622025"	"ENSP00000381148,ENSP00000447046,ENSP00000448386,ENSP00000446705,ENSP00000448951,ENSP00000448299,ENSP00000480551"
CTNND2	0.156749	0.414333	0.559572	0.095396	0.502675	0.02434	PH_hs_0030239	Homo sapiens catenin (cadherin-associated protein)	1	1501	NM_001332	NP_001323.1	ENSG00000169862	"ENST00000304623,ENST00000495388,ENST00000513588,ENST00000511377,ENST00000504499,ENST00000503622,ENST00000506324,ENST00000504354,ENST00000502551,ENST00000506735,ENST00000507430,ENST00000511278,ENST00000514132,ENST00000513598,ENST00000508761,ENST00000509868,ENST00000458100"	"ENSP00000307134,ENSP00000421093,ENSP00000426510,ENSP00000421000,ENSP00000426887,ENSP00000422389,ENSP00000426625,ENSP00000424296,ENSP00000391155"
CTSE	0.32611	0.0151973	0.124336	0.757385	-0.675424	0.34742	PH_hs_0027528	Homo sapiens cathepsin E (CTSE)	1	1510	"NM_148964,NM_001910"	"NP_683865.1,NP_001901.1"	ENSG00000196188	"ENST00000358184,ENST00000360218,ENST00000468617,ENST00000486757"	"ENSP00000350911,ENSP00000353350"
CTSW	-0.706272	0.0638718	-1.26693	0.00258783	-0.679134	0.347525	PH_hs_0019636	Homo sapiens cathepsin W (CTSW)	1	1521	NM_001335	NP_001326.2	ENSG00000172543	"ENST00000307886,ENST00000524681,ENST00000528419,ENST00000526034"	"ENSP00000311300,ENSP00000436568,ENSP00000434267"
CTTN	-0.262833	0.0491324	-0.567597	0.14425	-0.72036	0.102251	PH_hs_0023607	Homo sapiens cortactin (CTTN)	1	2017	"NM_001184740,NM_138565,NM_005231"	"NP_001171669.1,NP_612632.1,NP_005222.2"	ENSG00000085733	"ENST00000346329,ENST00000301843,ENST00000482755,ENST00000527622,ENST00000376561,ENST00000415461,ENST00000525276,ENST00000532334,ENST00000527962,ENST00000483662,ENST00000498223,ENST00000525852,ENST00000393747,ENST00000529736,ENST00000533931"	"ENSP00000317189,ENSP00000301843,ENSP00000365745,ENSP00000431421,ENSP00000436613"
CTTNBP2NL	-0.215072	0.430768	-0.778404	0.00223219	-0.658553	0.0278973	PH_hs_0044769	Homo sapiens CTTNBP2 N-terminal like (CTTNBP2NL)	1	55917	NM_018704	NP_061174.1	ENSG00000143079	"ENST00000271277,ENST00000441739,ENST00000502356,ENST00000607039"	"ENSP00000271277,ENSP00000390976"
CTTNBP2NL	-0.215072	0.430768	-0.778404	0.00223219	-0.658553	0.0278973	PH_hs_0044769	Homo sapiens CTTNBP2 N-terminal like (CTTNBP2NL)	1	55917	NM_018704	NP_061174.1	ENSG00000143079	"ENST00000271277,ENST00000441739,ENST00000502356,ENST00000607039"	"ENSP00000271277,ENSP00000390976"
CUBN	-0.232038	0.754705	0.0955017	0.720293	0.553419	0.0487924	PH_hs_0010013	Homo sapiens cubilin (intrinsic factor-cobalamin receptor)	1	8029	NM_001081	NP_001072.2	ENSG00000107611	"ENST00000377833,ENST00000438254,ENST00000433666,ENST00000377823"	"ENSP00000367064,ENSP00000391830,ENSP00000415970,ENSP00000367054"
CWC27	-0.46912	0.0167688	-0.132422	0.365339	-0.0530085	0.63475	PH_hs_0002070	Homo sapiens CWC27 spliceosome-associated protein homolog (S. cerevisiae)	1	10283	NM_005869	NP_005860.2	ENSG00000153015	"ENST00000381070,ENST00000508024,ENST00000485990,ENST00000506168,ENST00000545000"	"ENSP00000370460,ENSP00000426802"
CX3CR1	-0.147336	0.53011	-0.181057	0.222273	-0.643211	0.0327326	PH_hs_0004551	Homo sapiens chemokine (C-X3-C motif)	1	1524	"NM_001171174,NM_001171172,NM_001171171,NM_001337"	"NP_001164645.1,NP_001164643.1,NP_001164642.1,NP_001328.1"	ENSG00000168329	"ENST00000399220,ENST00000435290,ENST00000412814,ENST00000541347,ENST00000542107,ENST00000358309"	"ENSP00000382166,ENSP00000394960,ENSP00000408835,ENSP00000439140,ENSP00000444928,ENSP00000351059"
CXADR	0.2564	0.776353	0.915117	0.191144	1.32298	0.00852315	PH_hs_0045704	Homo sapiens coxsackie virus and adenovirus receptor (CXADR)	1	1525	"NM_001207064,NM_001338,NM_001207065,NM_001207063"	"NP_001193993.1,NP_001329.1,NP_001193994.1,NP_001193992.1"	ENSG00000154639	"ENST00000284878,ENST00000400166,ENST00000356275,ENST00000400165,ENST00000400169"	"ENSP00000284878,ENSP00000383030,ENSP00000348620,ENSP00000383029,ENSP00000383033"
CXCL1	-0.149266	0.691248	-1.40278	0.00240306	-1.34799	0.00306927	PH_hs_0030857	Homo sapiens chemokine (C-X-C motif)	1	2919	"NR_046035,NM_001511"	"-,NP_001502.1"	ENSG00000163739	"ENST00000509101,ENST00000395761"	ENSP00000379110
CXCL1	-0.149266	0.691248	-1.40278	0.00240306	-1.34799	0.00306927	PH_hs_0030857	Homo sapiens chemokine (C-X-C motif)	1	2919	"NR_046035,NM_001511"	"-,NP_001502.1"	ENSG00000163739	"ENST00000509101,ENST00000395761"	ENSP00000379110
CXCL11	0.0803883	0.725536	-0.394593	0.252646	-1.18873	0.00608164	PH_hs_0005769	Homo sapiens chemokine (C-X-C motif)	1	6373	NM_005409	NP_005400.1	ENSG00000169248	"ENST00000306621,ENST00000503860"	"ENSP00000306884,ENSP00000425819"
CXCL16	0.0478467	0.702804	0.0432584	0.896018	-1.39086	0.00223678	PH_hs_0046139	Homo sapiens chemokine (C-X-C motif)	1	58191	"NM_022059,NM_001100812"	"NP_071342.2,NP_001094282.1"	ENSG00000161921	"ENST00000293778,ENST00000576153,ENST00000574412,ENST00000575168,ENST00000573123"	"ENSP00000293778,ENSP00000459592,ENSP00000460145"
CXCL3	0.0201933	0.860493	0.489287	0.00674349	0.309377	0.133324	PH_hs_0005014	Homo sapiens chemokine (C-X-C motif)	1	2921	NM_002090	NP_002081.2	ENSG00000163734	"ENST00000296026,ENST00000511669,ENST00000502974,ENST00000510390"	ENSP00000296026
CXCL8	0.811909	0.00470175	0.0574511	0.639709	0.0674954	0.478444	PH_hs_0000069	Homo sapiens chemokine (C-X-C motif)	1	3576	NM_000584	NP_000575.1	ENSG00000169429	"ENST00000307407,ENST00000401931,ENST00000483500"	"ENSP00000306512,ENSP00000385908"
CXCR1	0.285115	0.0708609	0.614033	0.0407204	0.560076	0.095481	PH_hs_0011528	Homo sapiens chemokine (C-X-C motif)	1	3577	NM_000634	NP_000625.1	ENSG00000163464	ENST00000295683	ENSP00000295683
CXCR3	-0.709253	0.0848563	-1.50181	0.0288087	-0.955389	0.09554	PH_hs_0048568	Homo sapiens chemokine (C-X-C motif)	1	2833	"NM_001142797,NM_001504"	"NP_001136269.1,NP_001495.1"	ENSG00000186810	"ENST00000373691,ENST00000373693"	"ENSP00000362795,ENSP00000362797"
CXorf49|CXorf49B	-0.244416	0.189758	-0.315983	0.0215818	-0.135579	0.400176	PH_hs_0062133	Homo sapiens chromosome X open reading frame 49 (CXorf49)|Homo sapiens chromosome X open reading frame 49B (CXorf49B)	4	100130361|100132994	NM_001145140|NM_001145139	NP_001138612.1|NP_001138611.1	ENSG00000215115|ENSG00000215113	"ENST00000452468,ENST00000535490|ENST00000542739,ENST00000440412"	ENSP00000480355|ENSP00000482270
CXXC4	0.0908898	0.333588	0.572025	0.0792937	0.736434	0.00957057	PH_hs_0061914	Homo sapiens CXXC finger protein 4 (CXXC4)	1	80319	NM_025212	NP_079488.2	ENSG00000168772	"ENST00000394767,ENST00000466963,ENST00000515509"	ENSP00000378248
CYB5A	-0.352565	0.0804876	-0.324861	0.0196738	-0.150465	0.180381	PH_hs_0045556	Homo sapiens cytochrome b5 type A (microsomal)	1	1528	"NM_001190807,NM_001914,NM_148923"	"NP_001177736.1,NP_001905.1,NP_683725.1"	ENSG00000166347	"ENST00000340533,ENST00000580678,ENST00000299438,ENST00000494131,ENST00000583418,ENST00000397914,ENST00000579064"	"ENSP00000341625,ENSP00000299438,ENSP00000436461,ENSP00000381011"
CYBB	0.191017	0.129729	-0.495047	0.0430862	-0.281931	0.0981847	PH_hs_0004967	"Homo sapiens cytochrome b-245, beta polypeptide (CYBB)"	1	1536	NM_000397	NP_000388.2	ENSG00000165168	"ENST00000378588,ENST00000492288"	ENSP00000367851
CYP11B1|CYP11B2	-0.319798	0.0167665	-0.0347343	0.635049	-0.0544009	0.370686	PH_hs_0035658	"Homo sapiens cytochrome P450, family 11, subfamily B, polypeptide 1 (CYP11B1)|Homo sapiens cytochrome P450, family 11, subfamily B, polypeptide 2 (CYP11B2)"	4	1584|1585	"NM_000497,NM_001026213|NM_000498"	"NP_000488.3,NP_001021384.1|NP_000489.3"	ENSG00000160882|ENSG00000179142	"ENST00000314111,ENST00000519285,ENST00000292427,ENST00000517471,ENST00000377675|ENST00000323110"	"ENSP00000430144,ENSP00000292427,ENSP00000428043,ENSP00000366903|ENSP00000325822"
CYP17A1	-1.50029	0.0291397	-0.485323	0.446695	-0.918428	0.13087	PH_hs_0025651	"Homo sapiens cytochrome P450, family 17, subfamily A, polypeptide 1 (CYP17A1)"	1	1586	NM_000102	NP_000093.1	ENSG00000148795	"ENST00000369887,ENST00000469683,ENST00000489268"	ENSP00000358903
CYP1B1	0.19665	0.764807	0.210054	0.639036	1.0648	0.0109401	PH_hs_0009308	"Homo sapiens cytochrome P450, family 1, subfamily B, polypeptide 1 (CYP1B1)"	1	1545	NM_000104	NP_000095.2	ENSG00000138061	"ENST00000491456,ENST00000610745,ENST00000494864,ENST00000614273,ENST00000492443,ENST00000613082,ENST00000490576"	"ENSP00000478561,ENSP00000479876,ENSP00000483678,ENSP00000478839"
CYP20A1	0.19831	0.434908	-0.225314	0.367751	-0.593505	0.0430376	PH_hs_0026067	"Homo sapiens cytochrome P450, family 20, subfamily A, polypeptide 1 (CYP20A1)"	1	57404	NM_177538	NP_803882.1	ENSG00000119004	"ENST00000356079,ENST00000449301,ENST00000461371,ENST00000429815,ENST00000463131,ENST00000428265,ENST00000489360,ENST00000431118,ENST00000443941,ENST00000613925,ENST00000611416"	"ENSP00000348380,ENSP00000414831,ENSP00000407860,ENSP00000398046,ENSP00000388070,ENSP00000411341,ENSP00000482757,ENSP00000477866"
CYP24A1	-0.389219	0.316732	-0.312843	0.419354	-0.676576	0.0186368	PH_hs_0027729	"Homo sapiens cytochrome P450, family 24, subfamily A, polypeptide 1 (CYP24A1)"	1	1591	"NM_001128915,NM_000782"	"NP_001122387.1,NP_000773.2"	ENSG00000019186	"ENST00000216862,ENST00000395955,ENST00000460643,ENST00000395954,ENST00000487593,ENST00000472970"	"ENSP00000216862,ENSP00000379285,ENSP00000379284"
CYP26C1	-0.417136	0.0420174	-0.914457	0.00407599	-0.562712	0.176636	PH_hs_0024123	"Homo sapiens cytochrome P450, family 26, subfamily C, polypeptide 1 (CYP26C1)"	1	340665	NM_183374	NP_899230.2	ENSG00000187553	"ENST00000624358,ENST00000285949"	"ENSP00000485098,ENSP00000285949"
CYP26C1	-0.417136	0.0420174	-0.914457	0.00407599	-0.562712	0.176636	PH_hs_0024123	"Homo sapiens cytochrome P450, family 26, subfamily C, polypeptide 1 (CYP26C1)"	1	340665	NM_183374	NP_899230.2	ENSG00000187553	"ENST00000624358,ENST00000285949"	"ENSP00000485098,ENSP00000285949"
CYP27C1	0.241644	0.190662	0.328161	0.348125	0.785954	0.00688754	PH_hs_0036599	"Homo sapiens cytochrome P450, family 27, subfamily C, polypeptide 1 (CYP27C1)"	1	339761	NM_001001665	NP_001001665.3	ENSG00000186684	"ENST00000335247,ENST00000409327"	"ENSP00000334128,ENSP00000387198"
CYP2A13	-0.30892	0.360468	-0.525203	0.0147527	-1.3559	0.224088	PH_hs_0032038	"Homo sapiens cytochrome P450, family 2, subfamily A, polypeptide 13 (CYP2A13)"	1	1553	NM_000766	NP_000757.2	ENSG00000197838	ENST00000330436	ENSP00000332679
CYP2B6	0.400435	0.130326	0.794164	0.0266546	0.733033	0.0407039	PH_hs_0036841	"Homo sapiens cytochrome P450, family 2, subfamily B, polypeptide 6 (CYP2B6)"	1	1555	NM_000767	NP_000758.1	ENSG00000197408	"ENST00000324071,ENST00000598834,ENST00000593831,ENST00000594187,ENST00000597612"	"ENSP00000324648,ENSP00000470582"
CYP2B6	0.400435	0.130326	0.794164	0.0266546	0.733033	0.0407039	PH_hs_0036841	"Homo sapiens cytochrome P450, family 2, subfamily B, polypeptide 6 (CYP2B6)"	1	1555	NM_000767	NP_000758.1	ENSG00000197408	"ENST00000324071,ENST00000598834,ENST00000593831,ENST00000594187,ENST00000597612"	"ENSP00000324648,ENSP00000470582"
CYP2C18	0.0958351	0.344626	0.449165	0.0387984	-0.554945	0.659448	PH_hs_0028606	"Homo sapiens cytochrome P450, family 2, subfamily C, polypeptide 18 (CYP2C18)"	1	1562	"NM_001128925,NM_000772"	"NP_001122397.1,NP_000763.1"	ENSG00000108242	"ENST00000285979,ENST00000339022"	"ENSP00000285979,ENSP00000341293"
CYP2R1	0.243185	0.0450548	-0.058487	0.688939	-0.209392	0.214275	PH_hs_0032929	"Homo sapiens cytochrome P450, family 2, subfamily R, polypeptide 1 (CYP2R1)"	1	120227	NM_024514	NP_078790.2	ENSG00000186104	"ENST00000334636,ENST00000532805,ENST00000530609,ENST00000534686,ENST00000525015,ENST00000532378,ENST00000526489,ENST00000526276,ENST00000532641,ENST00000529043"	"ENSP00000334592,ENSP00000465097,ENSP00000466060,ENSP00000432087,ENSP00000466604,ENSP00000435484"
CYP2S1	0.0655451	0.411878	0.250748	0.0304057	0.0486032	0.744465	PH_hs_0031453	"Homo sapiens cytochrome P450, family 2, subfamily S, polypeptide 1 (CYP2S1)"	1	29785	NM_030622	NP_085125.1	ENSG00000167600	"ENST00000310054,ENST00000597754,ENST00000593545,ENST00000600561,ENST00000595590,ENST00000593890"	"ENSP00000308032,ENSP00000471637,ENSP00000472555,ENSP00000471016,ENSP00000469593,ENSP00000469850"
CYP39A1	-0.0358945	0.829676	-0.440951	0.179926	-0.91321	0.0140963	PH_hs_0024421	"Homo sapiens cytochrome P450, family 39, subfamily A, polypeptide 1 (CYP39A1)"	1	51302	NM_016593	NP_057677.2	ENSG00000146233	"ENST00000275016,ENST00000489657,ENST00000476076,ENST00000480804,ENST00000619708"	"ENSP00000275016,ENSP00000477769"
CYP4X1	0.540866	0.546824	1.14251	0.0953547	1.42708	0.0426531	PH_hs_0028459	"Homo sapiens cytochrome P450, family 4, subfamily X, polypeptide 1 (CYP4X1)"	1	260293	NM_178033	NP_828847.1	ENSG00000186377	"ENST00000371901,ENST00000466294"	ENSP00000360968
CYSLTR1	0.532489	0.121823	-0.332567	0.211296	-0.561785	0.043555	PH_hs_0022985	Homo sapiens cysteinyl leukotriene receptor 1 (CYSLTR1)	1	10800	NM_006639	NP_006630.1	ENSG00000173198	"ENST00000373304,ENST00000493254,ENST00000614798"	"ENSP00000362401,ENSP00000478492"
CYTH2	0.28931	0.11048	-0.109221	0.709934	-0.349249	0.0530643	PH_hs_0000903	Homo sapiens cytohesin 2 (CYTH2)	1	9266	"NM_017457,NM_004228"	"NP_059431.1,NP_004219.3"	ENSG00000105443	"ENST00000452733,ENST00000460595,ENST00000391881,ENST00000493260,ENST00000462117,ENST00000474049,ENST00000325139,ENST00000595765,ENST00000474209,ENST00000467412,ENST00000600597,ENST00000427476,ENST00000620214"	"ENSP00000408236,ENSP00000375753,ENSP00000314566,ENSP00000472602,ENSP00000486578,ENSP00000482082"
CYTH2	-0.0819404	0.631214	0.602257	0.0423373	0.37385	0.481549	PH_hs_0039437	Homo sapiens cytohesin 2 (CYTH2)	1	9266	"NM_017457,NM_004228"	"NP_059431.1,NP_004219.3"	ENSG00000105443	"ENST00000452733,ENST00000460595,ENST00000391881,ENST00000493260,ENST00000462117,ENST00000474049,ENST00000325139,ENST00000595765,ENST00000474209,ENST00000467412,ENST00000600597,ENST00000427476,ENST00000620214"	"ENSP00000408236,ENSP00000375753,ENSP00000314566,ENSP00000472602,ENSP00000486578,ENSP00000482082"
DACT2	-0.380692	0.01235	0.499869	0.0888053	1.20851	0.000479957	PH_hs_0013193	Homo sapiens dishevelled-binding antagonist of beta-catenin 2 (DACT2)	1	168002	NM_214462	NP_999627.2	ENSG00000164488	"ENST00000366796,ENST00000366795,ENST00000610183,ENST00000607983"	"ENSP00000355761,ENSP00000355760,ENSP00000476573,ENSP00000476434"
DACT2	-0.380692	0.01235	0.499869	0.0888053	1.20851	0.000479957	PH_hs_0013193	Homo sapiens dishevelled-binding antagonist of beta-catenin 2 (DACT2)	1	168002	NM_214462	NP_999627.2	ENSG00000164488	"ENST00000366796,ENST00000366795,ENST00000610183,ENST00000607983"	"ENSP00000355761,ENSP00000355760,ENSP00000476573,ENSP00000476434"
DAP3	-0.375714	0.0236782	-0.204172	0.0768106	-0.12264	0.164884	PH_hs_0023346	Homo sapiens death associated protein 3 (DAP3)	1	7818	"NM_001199851,NM_001199850,NM_001199849,NM_004632,NM_033657"	"NP_001186780.1,NP_001186779.1,NP_001186778.1,NP_004623.1,NP_387506.1"	ENSG00000132676	"ENST00000461479,ENST00000471642,ENST00000471214,ENST00000479076,ENST00000368336,ENST00000343043,ENST00000496863,ENST00000421487,ENST00000465375,ENST00000462002,ENST00000470830,ENST00000463575,ENST00000497826,ENST00000471523,ENST00000608852,ENST00000479151,ENST00000466384,ENST00000462978,ENST00000477394,ENST00000475056,ENST00000490249,ENST00000497433,ENST00000463295,ENST00000476444,ENST0000049177…	"ENSP00000476592,ENSP00000476899,ENSP00000357320,ENSP00000341692,ENSP00000412605,ENSP00000476889,ENSP00000476816,ENSP00000476291,ENSP00000476840,ENSP00000477025,ENSP00000477265,ENSP00000476558,ENSP00000476624,ENSP00000477139,ENSP00000477453,ENSP00000476706,ENSP00000445003"
DAPK2	0.0944738	0.5976	0.733676	0.0528421	0.655331	0.115137	PH_hs_0007533	Homo sapiens death-associated protein kinase 2 (DAPK2)	1	23604	NM_014326	NP_055141.2	ENSG00000035664	"ENST00000559007,ENST00000457488,ENST00000559731,ENST00000558064,ENST00000557867,ENST00000612884,ENST00000558076,ENST00000558482,ENST00000559897,ENST00000561162,ENST00000559306,ENST00000261891,ENST00000558069"	"ENSP00000453639,ENSP00000408277,ENSP00000453101,ENSP00000484390,ENSP00000453284,ENSP00000452970,ENSP00000261891,ENSP00000453235"
DBNDD2	0.233651	0.311359	0.77265	0.00375996	0.842285	0.0143045	PH_hs_0045561	Homo sapiens dysbindin (dystrobrevin binding protein 1)	1	55861	"NM_018478,NM_001048226,NM_001048225"	"NP_060948.3,NP_001041691.2,NP_001041690.2"	ENSG00000244274	"ENST00000372723,ENST00000372722,ENST00000357275,ENST00000372720,ENST00000372717,ENST00000360981,ENST00000372712,ENST00000372710,ENST00000443296"	"ENSP00000361808,ENSP00000361807,ENSP00000349822,ENSP00000361805,ENSP00000361802,ENSP00000354250,ENSP00000361797,ENSP00000361795,ENSP00000414161"
DBNDD2	0.233651	0.311359	0.77265	0.00375996	0.842285	0.0143045	PH_hs_0045561	Homo sapiens dysbindin (dystrobrevin binding protein 1)	1	55861	"NM_018478,NM_001048226,NM_001048225"	"NP_060948.3,NP_001041691.2,NP_001041690.2"	ENSG00000244274	"ENST00000372723,ENST00000372722,ENST00000357275,ENST00000372720,ENST00000372717,ENST00000360981,ENST00000372712,ENST00000372710,ENST00000443296"	"ENSP00000361808,ENSP00000361807,ENSP00000349822,ENSP00000361805,ENSP00000361802,ENSP00000354250,ENSP00000361797,ENSP00000361795,ENSP00000414161"
DBNDD2|SYS1-DBNDD2	-0.281462	0.0758636	-0.325281	0.0242078	-0.30163	0.0834597	PH_hs_0049536	Homo sapiens dysbindin (dystrobrevin binding protein 1)|Homo sapiens SYS1-DBNDD2 readthrough (NMD candidate)	4	55861|767557	"NM_001048223,NM_001048221,NM_018478,NM_001197140,NM_001197139,NM_001048224,NM_001048226,NM_001048225,NM_001048222|NR_003189"	"NP_001041688.1,NP_001041686.1,NP_060948.3,NP_001184069.1,NP_001184068.1,NP_001041689.1,NP_001041691.2,NP_001041690.2,NP_001041687.1|-"	ENSG00000244274	"ENST00000372723,ENST00000372722,ENST00000357275,ENST00000372720,ENST00000372717,ENST00000360981,ENST00000372712,ENST00000372710,ENST00000443296"	"ENSP00000361808,ENSP00000361807,ENSP00000349822,ENSP00000361805,ENSP00000361802,ENSP00000354250,ENSP00000361797,ENSP00000361795,ENSP00000414161"
DCAF4	0.392775	0.0618513	0.544474	0.126841	0.512387	0.0401786	PH_hs_0023836	Homo sapiens DDB1 and CUL4 associated factor 4 (DCAF4)	1	26094	"NM_001163509,NM_001163508,NM_181341,NM_181340,NM_015604"	"NP_001156981.1,NP_001156980.1,NP_851938.2,NP_851937.1,NP_056419.2"	ENSG00000119599	"ENST00000358377,ENST00000353777,ENST00000509320,ENST00000394234,ENST00000509153,ENST00000555042,ENST00000514191,ENST00000505361,ENST00000510612,ENST00000508412,ENST00000514486,ENST00000553457,ENST00000513337,ENST00000557203,ENST00000555992"	"ENSP00000351147,ENSP00000345176,ENSP00000422270,ENSP00000377781,ENSP00000426178,ENSP00000452131,ENSP00000451186"
DCAF5	0.0253462	0.880083	-0.418121	0.02392	-0.547039	0.00943806	PH_hs_0034222	Homo sapiens DDB1 and CUL4 associated factor 5 (DCAF5)	1	8816	NM_003861	NP_003852.1	ENSG00000139990	"ENST00000341516,ENST00000554215,ENST00000556847,ENST00000557386,ENST00000553293,ENST00000556111,ENST00000389997,ENST00000554681,ENST00000553943"	"ENSP00000341351,ENSP00000451551,ENSP00000452052,ENSP00000451845,ENSP00000452077,ENSP00000374647,ENSP00000451394"
DCAF5	0.0253462	0.880083	-0.418121	0.02392	-0.547039	0.00943806	PH_hs_0034222	Homo sapiens DDB1 and CUL4 associated factor 5 (DCAF5)	1	8816	NM_003861	NP_003852.1	ENSG00000139990	"ENST00000341516,ENST00000554215,ENST00000556847,ENST00000557386,ENST00000553293,ENST00000556111,ENST00000389997,ENST00000554681,ENST00000553943"	"ENSP00000341351,ENSP00000451551,ENSP00000452052,ENSP00000451845,ENSP00000452077,ENSP00000374647,ENSP00000451394"
DCBLD1	0.0241919	0.9159	-0.941149	0.00775458	-1.14015	0.00593704	PH_hs_0026248	"Homo sapiens discoidin, CUB and LCCL domain containing 1 (DCBLD1)"	1	285761	NM_173674	NP_775945.1	ENSG00000164465	"ENST00000528138,ENST00000525483,ENST00000533950,ENST00000528162,ENST00000296955,ENST00000338728,ENST00000533453,ENST00000481630,ENST00000424717,ENST00000534777,ENST00000478345,ENST00000487076"	"ENSP00000296955,ENSP00000342422,ENSP00000391700"
DCBLD1	0.0241919	0.9159	-0.941149	0.00775458	-1.14015	0.00593704	PH_hs_0026248	"Homo sapiens discoidin, CUB and LCCL domain containing 1 (DCBLD1)"	1	285761	NM_173674	NP_775945.1	ENSG00000164465	"ENST00000528138,ENST00000525483,ENST00000533950,ENST00000528162,ENST00000296955,ENST00000338728,ENST00000533453,ENST00000481630,ENST00000424717,ENST00000534777,ENST00000478345,ENST00000487076"	"ENSP00000296955,ENSP00000342422,ENSP00000391700"
DCBLD2	-0.41985	0.0201446	-0.191394	0.406369	0.0351737	0.840331	PH_hs_0031999	"Homo sapiens discoidin, CUB and LCCL domain containing 2 (DCBLD2)"	1	131566	NM_080927	NP_563615.3	ENSG00000057019	"ENST00000326840,ENST00000326857,ENST00000496736,ENST00000494614,ENST00000479144,ENST00000470393,ENST00000460008,ENST00000469648,ENST00000486004,ENST00000449482"	"ENSP00000321573,ENSP00000321646,ENSP00000396803"
DCHS2	0.230921	0.723489	0.285907	0.242534	0.795276	0.00766967	PH_hs_0046061	PREDICTED: Homo sapiens dachsous cadherin-related 2 (DCHS2)	1	54798	"XM_011532045,NM_001142552"	"XP_011530347.1,NP_001136024.1"	ENSG00000197410	"ENST00000357232,ENST00000623568,ENST00000339452,ENST00000624983,ENST00000507542,ENST00000504580,ENST00000456341,ENST00000623607"	"ENSP00000349768,ENSP00000345062,ENSP00000485514"
DCLK1	0.068472	0.671113	0.678036	0.0168923	0.588825	0.00358042	PH_hs_0060183	Homo sapiens doublecortin-like kinase 1 (DCLK1)	1	9201	NM_001195430	NP_001182359.1	ENSG00000133083	"ENST00000360631,ENST00000379893,ENST00000255448,ENST00000477664,ENST00000486239,ENST00000460982,ENST00000379892,ENST00000615680"	"ENSP00000353846,ENSP00000369223,ENSP00000255448,ENSP00000369222,ENSP00000484452"
DCLK1	0.068472	0.671113	0.678036	0.0168923	0.588825	0.00358042	PH_hs_0060183	Homo sapiens doublecortin-like kinase 1 (DCLK1)	1	9201	NM_001195430	NP_001182359.1	ENSG00000133083	"ENST00000360631,ENST00000379893,ENST00000255448,ENST00000477664,ENST00000486239,ENST00000460982,ENST00000379892,ENST00000615680"	"ENSP00000353846,ENSP00000369223,ENSP00000255448,ENSP00000369222,ENSP00000484452"
DCLK2	0.435053	0.521444	0.330387	0.510197	1.14024	0.00338704	PH_hs_0043599	Homo sapiens doublecortin-like kinase 2 (DCLK2)	1	166614	"NM_001040261,NM_001040260,NR_036614"	"NP_001035351.4,NP_001035350.2,-"	ENSG00000170390	"ENST00000296550,ENST00000411937,ENST00000506325,ENST00000302176,ENST00000507694"	"ENSP00000296550,ENSP00000401916,ENSP00000427235,ENSP00000303887"
DCN	0.29488	0.635153	0.509423	0.0976176	0.621032	0.0480725	PH_hs_0044591	Homo sapiens decorin (DCN)	1	1634	"NM_133503,NM_001920,NM_133504,NM_133505,NM_133506,NM_133507"	"NP_598010.1,NP_001911.1,NP_598011.1,NP_598012.1,NP_598013.1,NP_598014.1"	ENSG00000011465	"ENST00000052754,ENST00000548218,ENST00000552962,ENST00000441303,ENST00000420120,ENST00000547568,ENST00000546391,ENST00000456569,ENST00000550758,ENST00000547937,ENST00000552145,ENST00000550563,ENST00000549513,ENST00000546370,ENST00000546745,ENST00000550099,ENST00000551354,ENST00000548768,ENST00000425043,ENST00000393155"	"ENSP00000052754,ENSP00000448853,ENSP00000447654,ENSP00000399815,ENSP00000413723,ENSP00000447674,ENSP00000446530,ENSP00000398514,ENSP00000449408,ENSP00000449782,ENSP00000447886,ENSP00000449014,ENSP00000449438,ENSP00000446527,ENSP00000448857,ENSP00000448057,ENSP00000448274,ENSP00000401021,ENSP00000376862"
DCP1B	0.00451642	0.981046	-0.867126	0.133237	-0.48267	0.026963	PH_hs_0023277	Homo sapiens decapping mRNA 1B (DCP1B)	1	196513	NM_152640	NP_689853.3	ENSG00000151065	"ENST00000280665,ENST00000543381,ENST00000540622,ENST00000536665,ENST00000541700,ENST00000537725,ENST00000535873"	"ENSP00000280665,ENSP00000445011,ENSP00000444374,ENSP00000482714"
DCSTAMP	0.155657	0.432217	-0.306246	0.103188	-0.381071	0.0405699	PH_hs_0012255	Homo sapiens dendrocyte expressed seven transmembrane protein (DCSTAMP)	1	81501	"NM_001257317,NM_030788"	"NP_001244246.1,NP_110415.1"	ENSG00000164935	"ENST00000519562,ENST00000517364,ENST00000518023,ENST00000297581,ENST00000517991,ENST00000518051,ENST00000520080,ENST00000622554"	"ENSP00000297581,ENSP00000428869,ENSP00000480546"
DCT	0.0685495	0.86854	0.110228	0.733466	0.36748	0.0332882	PH_hs_0015572	Homo sapiens dopachrome tautomerase (DCT)	1	1638	"NM_001129889,NM_001922"	"NP_001123361.1,NP_001913.2"	ENSG00000080166	"ENST00000377028,ENST00000483392,ENST00000490854,ENST00000472871,ENST00000446125"	"ENSP00000366227,ENSP00000431275,ENSP00000392762"
DCXR	-0.502793	0.0379928	-0.20745	0.0656568	-0.11669	0.533848	PH_hs_0001021	Homo sapiens dicarbonyl/L-xylulose reductase (DCXR)	1	51181	"NM_001195218,NM_016286"	"NP_001182147.1,NP_057370.1"	ENSG00000169738	"ENST00000577532,ENST00000306869,ENST00000579004,ENST00000579334,ENST00000580320,ENST00000577286,ENST00000579842,ENST00000580750,ENST00000578885,ENST00000582074,ENST00000581584,ENST00000578273,ENST00000582900,ENST00000579821,ENST00000585085,ENST00000577996,ENST00000577712,ENST00000579155,ENST00000582613,ENST00000584318,ENST00000585164"	"ENSP00000463354,ENSP00000303356,ENSP00000464332,ENSP00000464507,ENSP00000462272,ENSP00000464518,ENSP00000462725,ENSP00000462226"
DDC	0.0758717	0.909056	0.16153	0.704949	1.35211	0.0251924	PH_hs_0060350	Homo sapiens dopa decarboxylase (aromatic L-amino acid decarboxylase)	1	1644	NM_001242890	NP_001229819.1	ENSG00000132437	"ENST00000357936,ENST00000431062,ENST00000444733,ENST00000426377,ENST00000495320,ENST00000444124,ENST00000430300,ENST00000494914,ENST00000380984,ENST00000489162,ENST00000420203,ENST00000615193,ENST00000617822,ENST00000622873"	"ENSP00000350616,ENSP00000399184,ENSP00000393724,ENSP00000395069,ENSP00000403644,ENSP00000389422,ENSP00000370371,ENSP00000408626,ENSP00000484104,ENSP00000478385,ENSP00000479110"
DDO	0.172715	0.692371	0.712561	0.0123117	0.669605	0.0197781	PH_hs_0010447	Homo sapiens D-aspartate oxidase (DDO)	1	8528	"NM_004032,NM_003649"	"NP_004023.2,NP_003640.2"	ENSG00000203797	"ENST00000368924,ENST00000368923,ENST00000479373"	"ENSP00000357920,ENSP00000357919,ENSP00000436642"
DDO	0.172715	0.692371	0.712561	0.0123117	0.669605	0.0197781	PH_hs_0010447	Homo sapiens D-aspartate oxidase (DDO)	1	8528	"NM_004032,NM_003649"	"NP_004023.2,NP_003640.2"	ENSG00000203797	"ENST00000368924,ENST00000368923,ENST00000479373"	"ENSP00000357920,ENSP00000357919,ENSP00000436642"
DDR2	0.0443802	0.725907	0.77891	0.0335559	0.983026	0.00350344	PH_hs_0025814	Homo sapiens discoidin domain receptor tyrosine kinase 2 (DDR2)	1	4921	"NM_001014796,NM_006182"	"NP_001014796.1,NP_006173.2"	ENSG00000162733	"ENST00000446985,ENST00000415555,ENST00000367922,ENST00000367921,ENST00000458105,ENST00000433757"	"ENSP00000400309,ENSP00000391310,ENSP00000356899,ENSP00000356898,ENSP00000417030,ENSP00000396864"
DDR2	0.0443802	0.725907	0.77891	0.0335559	0.983026	0.00350344	PH_hs_0025814	Homo sapiens discoidin domain receptor tyrosine kinase 2 (DDR2)	1	4921	"NM_001014796,NM_006182"	"NP_001014796.1,NP_006173.2"	ENSG00000162733	"ENST00000446985,ENST00000415555,ENST00000367922,ENST00000367921,ENST00000458105,ENST00000433757"	"ENSP00000400309,ENSP00000391310,ENSP00000356899,ENSP00000356898,ENSP00000417030,ENSP00000396864"
DDX19B	-0.276517	0.0250796	-0.141087	0.294721	-0.07937	0.568432	PH_hs_0049695	Homo sapiens DEAD (Asp-Glu-Ala-Asp)	1	11269	"NM_001257175,NM_001257174,NM_001257173,NM_001257172,NM_001014449,NM_001014451,NM_007242"	"NP_001244104.1,NP_001244103.1,NP_001244102.1,NP_001244101.1,NP_001014449.1,NP_001014451.1,NP_009173.1"	ENSG00000157349	"ENST00000566216,ENST00000563392,ENST00000570055,ENST00000563206,ENST00000451014,ENST00000569099,ENST00000568625,ENST00000288071,ENST00000562519,ENST00000393657,ENST00000568008,ENST00000562912,ENST00000568460,ENST00000355992,ENST00000568408,ENST00000569224,ENST00000629131"	"ENSP00000454495,ENSP00000456574,ENSP00000455813,ENSP00000392639,ENSP00000456757,ENSP00000288071,ENSP00000455193,ENSP00000377267,ENSP00000454571,ENSP00000459407,ENSP00000457633,ENSP00000348271,ENSP00000457366,ENSP00000486802"
DDX43	0.236028	0.615607	-0.570342	0.0136168	-0.826266	0.00687727	PH_hs_0027231	Homo sapiens DEAD (Asp-Glu-Ala-Asp)	1	55510	NM_018665	NP_061135.2	ENSG00000080007	"ENST00000370336,ENST00000464221,ENST00000479773"	ENSP00000359361
DDX43	0.236028	0.615607	-0.570342	0.0136168	-0.826266	0.00687727	PH_hs_0027231	Homo sapiens DEAD (Asp-Glu-Ala-Asp)	1	55510	NM_018665	NP_061135.2	ENSG00000080007	"ENST00000370336,ENST00000464221,ENST00000479773"	ENSP00000359361
DDX56	-0.310917	0.200571	-0.539829	0.0443452	-0.507732	0.0574939	PH_hs_0040744	Homo sapiens DEAD (Asp-Glu-Ala-Asp)	1	54606	"NM_001257189,NM_019082"	"NP_001244118.1,NP_061955.1"	ENSG00000136271	"ENST00000258772,ENST00000446987,ENST00000421223,ENST00000479602,ENST00000485367,ENST00000467318,ENST00000433257,ENST00000431640,ENST00000448192,ENST00000415758,ENST00000473924,ENST00000479440"	"ENSP00000258772,ENSP00000402989,ENSP00000392139,ENSP00000411456,ENSP00000393488,ENSP00000390553,ENSP00000388310"
DEF6	0.0716115	0.664266	-0.0742497	0.75259	-0.252149	0.026537	PH_hs_0027084	Homo sapiens differentially expressed in FDCP 6 homolog (mouse)	1	50619	NM_022047	NP_071330.3	ENSG00000023892	"ENST00000316637,ENST00000444278,ENST00000468102"	"ENSP00000319831,ENSP00000415357"
DEF8	0.0524577	0.507303	-0.395254	0.0486291	-0.217199	0.0597689	PH_hs_0031281	Homo sapiens differentially expressed in FDCP 8 homolog (mouse)	1	54849	"NM_001242820,NM_001242819,NM_001242818,NM_001242817,NM_001242816,NM_207514"	"NP_001229749.1,NP_001229748.1,NP_001229747.1,NP_001229746.1,NP_001229745.1,NP_997397.1"	ENSG00000140995	"ENST00000563594,ENST00000567999,ENST00000566079,ENST00000561784,ENST00000566820,ENST00000562578,ENST00000561741,ENST00000268676,ENST00000562986,ENST00000569453,ENST00000568096,ENST00000567243,ENST00000567884,ENST00000569803,ENST00000569061,ENST00000418391,ENST00000561959,ENST00000567874,ENST00000570182,ENST00000563795,ENST00000564836,ENST00000568760,ENST00000562044,ENST00000563848,ENST0000056380…	"ENSP00000458019,ENSP00000457072,ENSP00000456954,ENSP00000455654,ENSP00000455783,ENSP00000454534,ENSP00000457309,ENSP00000268676,ENSP00000455987,ENSP00000456501,ENSP00000456157,ENSP00000454478,ENSP00000412784,ENSP00000456706,ENSP00000456095,ENSP00000456799,ENSP00000457627,ENSP00000454930,ENSP00000480073,ENSP00000482524"
DEFA5	0.0134784	0.909865	0.487879	0.0583488	0.478682	0.00790118	PH_hs_0042513	"Homo sapiens defensin, alpha 5, Paneth cell-specific (DEFA5)"	1	1670	NM_021010	NP_066290.1	ENSG00000164816	ENST00000330590	ENSP00000329890
DEFB1	-0.393306	0.236246	-0.378194	0.0281845	-0.323277	0.0385274	PH_hs_0042515	"Homo sapiens defensin, beta 1 (DEFB1)"	1	1672	NM_005218	NP_005209.1	ENSG00000164825	ENST00000297439	ENSP00000297439
DEFB1	-0.393306	0.236246	-0.378194	0.0281845	-0.323277	0.0385274	PH_hs_0042515	"Homo sapiens defensin, beta 1 (DEFB1)"	1	1672	NM_005218	NP_005209.1	ENSG00000164825	ENST00000297439	ENSP00000297439
DEFB106B|DEFB106A	-0.0716166	0.601037	-0.792714	0.0190549	-1.07292	0.00637033	PH_hs_0023083	"Homo sapiens defensin, beta 106B (DEFB106B)|Homo sapiens defensin, beta 106A (DEFB106A)"	4	503841|245909	NM_001040704|NM_152251	NP_001035794.1|NP_689464.1	ENSG00000187082|ENSG00000186579	ENST00000335479|ENST00000335186	ENSP00000334364|ENSP00000335307
DEFB106B|DEFB106A	-0.0716166	0.601037	-0.792714	0.0190549	-1.07292	0.00637033	PH_hs_0023083	"Homo sapiens defensin, beta 106B (DEFB106B)|Homo sapiens defensin, beta 106A (DEFB106A)"	4	503841|245909	NM_001040704|NM_152251	NP_001035794.1|NP_689464.1	ENSG00000187082|ENSG00000186579	ENST00000335479|ENST00000335186	ENSP00000334364|ENSP00000335307
DEFB126	0.0380463	0.799033	0.599147	0.0349162	0.33227	0.599908	PH_hs_0006991	"Homo sapiens defensin, beta 126 (DEFB126)"	1	81623	NM_030931	NP_112193.1	ENSG00000125788	"ENST00000382398,ENST00000542572"	ENSP00000371835
DEGS2	-0.118368	0.401963	0.290612	0.248427	0.420958	0.0424069	PH_hs_0009731	Homo sapiens delta(4)	1	123099	NM_206918	NP_996801.2	ENSG00000168350	"ENST00000305631,ENST00000553834,ENST00000557117"	"ENSP00000307126,ENSP00000450637"
DENND1B	-0.206054	0.303446	-0.50934	0.0140878	-0.430093	0.0349737	PH_hs_0032909	Homo sapiens DENN/MADD domain containing 1B (DENND1B)	1	163486	NM_144977	NP_659414.2	ENSG00000213047	"ENST00000391979,ENST00000294737,ENST00000463124,ENST00000235453,ENST00000367396,ENST00000496935,ENST00000422998,ENST00000294738,ENST00000468589,ENST00000495550,ENST00000477581,ENST00000620048"	"ENSP00000375839,ENSP00000294737,ENSP00000235453,ENSP00000356366,ENSP00000410025,ENSP00000479816"
DENND1B	-0.206054	0.303446	-0.50934	0.0140878	-0.430093	0.0349737	PH_hs_0032909	Homo sapiens DENN/MADD domain containing 1B (DENND1B)	1	163486	NM_144977	NP_659414.2	ENSG00000213047	"ENST00000391979,ENST00000294737,ENST00000463124,ENST00000235453,ENST00000367396,ENST00000496935,ENST00000422998,ENST00000294738,ENST00000468589,ENST00000495550,ENST00000477581,ENST00000620048"	"ENSP00000375839,ENSP00000294737,ENSP00000235453,ENSP00000356366,ENSP00000410025,ENSP00000479816"
DGCR14	0.0505819	0.68248	0.0666263	0.862068	-0.258936	0.0432639	PH_hs_0023652	Homo sapiens DiGeorge syndrome critical region gene 14 (DGCR14)	1	8220	NM_022719	NP_073210.1	ENSG00000100056	"ENST00000252137,ENST00000434568,ENST00000472073,ENST00000469466"	"ENSP00000252137,ENSP00000388524"
DGKE	0.239369	0.0413687	-0.0496331	0.600677	-0.0064331	0.915071	PH_hs_0012903	"Homo sapiens diacylglycerol kinase, epsilon 64kDa (DGKE)"	1	8526	NM_003647	NP_003638.1	ENSG00000153933	"ENST00000284061,ENST00000572810,ENST00000576869,ENST00000572944,ENST00000571084,ENST00000570738"	"ENSP00000284061,ENSP00000459295,ENSP00000458493,ENSP00000459958"
DGUOK	0.154391	0.447062	-0.000923365	0.997583	-0.218615	0.0510068	PH_hs_0060490	Homo sapiens deoxyguanosine kinase (DGUOK)	1	1716	NM_080916	NP_550438.1	ENSG00000114956	"ENST00000264093,ENST00000348222,ENST00000418996,ENST00000462551,ENST00000489796,ENST00000462685,ENST00000493055,ENST00000629438"	"ENSP00000264093,ENSP00000306964,ENSP00000408209,ENSP00000487122"
DHRS4L2	0.0712101	0.463135	0.313632	0.0214536	0.259279	0.176576	PH_hs_0036090	Homo sapiens dehydrogenase/reductase (SDR family)	1	317749	"NM_001193637,NM_001193636,NM_001193635"	"NP_001180566.1,NP_001180565.1,NP_001180564.1"	ENSG00000157326	ENST00000559975	ENSP00000454099
DHRS9	-0.343581	0.0487187	-0.416302	0.0245482	-0.00642265	0.946651	PH_hs_0010636	Homo sapiens dehydrogenase/reductase (SDR family)	1	10170	"NM_199204,NM_001142271,NM_001142270"	"NP_954674.1,NP_001135743.1,NP_001135742.1"	ENSG00000073737	"ENST00000602501,ENST00000357546,ENST00000428522,ENST00000450153,ENST00000421653,ENST00000436483,ENST00000412271,ENST00000432060"	"ENSP00000473337,ENSP00000350154,ENSP00000388564,ENSP00000391214,ENSP00000388066,ENSP00000407167,ENSP00000407747,ENSP00000389241"
DHRS9	-0.343581	0.0487187	-0.416302	0.0245482	-0.00642265	0.946651	PH_hs_0010636	Homo sapiens dehydrogenase/reductase (SDR family)	1	10170	"NM_199204,NM_001142271,NM_001142270"	"NP_954674.1,NP_001135743.1,NP_001135742.1"	ENSG00000073737	"ENST00000602501,ENST00000357546,ENST00000428522,ENST00000450153,ENST00000421653,ENST00000436483,ENST00000412271,ENST00000432060"	"ENSP00000473337,ENSP00000350154,ENSP00000388564,ENSP00000391214,ENSP00000388066,ENSP00000407167,ENSP00000407747,ENSP00000389241"
DIAPH2	-0.0186221	0.857165	-0.520353	0.0107585	-0.441106	0.0287005	PH_hs_0045287	Homo sapiens diaphanous-related formin 2 (DIAPH2)	1	1730	NM_006729	NP_006720.1	ENSG00000147202	"ENST00000373049,ENST00000324765,ENST00000373061,ENST00000355827,ENST00000373054"	"ENSP00000362140,ENSP00000321348,ENSP00000362152,ENSP00000348082,ENSP00000362145"
DIAPH2	-0.0186221	0.857165	-0.520353	0.0107585	-0.441106	0.0287005	PH_hs_0045287	Homo sapiens diaphanous-related formin 2 (DIAPH2)	1	1730	NM_006729	NP_006720.1	ENSG00000147202	"ENST00000373049,ENST00000324765,ENST00000373061,ENST00000355827,ENST00000373054"	"ENSP00000362140,ENSP00000321348,ENSP00000362152,ENSP00000348082,ENSP00000362145"
DIEXF	0.160319	0.304953	-0.0524391	0.808768	-0.245147	0.0250532	PH_hs_0011521	Homo sapiens digestive organ expansion factor homolog (zebrafish)	1	27042	NM_014388	NP_055203.4	ENSG00000117597	"ENST00000491415,ENST00000457820"	"ENSP00000419005,ENSP00000407345"
DIMT1	-0.35972	0.1998	-0.285729	0.0416598	-0.184926	0.476354	PH_hs_0060987	Homo sapiens DIM1 dimethyladenosine transferase 1 homolog (S. cerevisiae)	1	27292	NM_014473	NP_055288.1	ENSG00000086189	"ENST00000199320,ENST00000514605,ENST00000506390,ENST00000514911,ENST00000509182"	"ENSP00000199320,ENSP00000421754,ENSP00000427193"
DISC1|TSNAX-DISC1	0.318459	0.252227	-0.510398	0.168366	-0.890474	0.0229701	PH_hs_0049729	Homo sapiens disrupted in schizophrenia 1 (DISC1)|Homo sapiens TSNAX-DISC1 readthrough (NMD candidate)	4	27185|100303453	"NM_001164544,NM_001164548,NM_001164545,NM_001164556|NR_028398,NR_028397,NR_028396,NR_028395,NR_028394"	"NP_001158016.1,NP_001158020.1,NP_001158017.1,NP_001158028.1|-,-,-,-,-"	ENSG00000162946	"ENST00000317586,ENST00000602873,ENST00000602700,ENST00000602822,ENST00000535944,ENST00000539444,ENST00000295051,ENST00000602281,ENST00000366633,ENST00000366632,ENST00000602713,ENST00000366636,ENST00000628350,ENST00000535983,ENST00000366637,ENST00000439617,ENST00000422590,ENST00000468399,ENST00000602600,ENST00000427560,ENST00000622252,ENST00000537876,ENST00000620189"	"ENSP00000320784,ENSP00000473386,ENSP00000473417,ENSP00000473586,ENSP00000441193,ENSP00000440953,ENSP00000295051,ENSP00000473425,ENSP00000355593,ENSP00000355592,ENSP00000473261,ENSP00000355596,ENSP00000487190,ENSP00000443996,ENSP00000355597,ENSP00000403888,ENSP00000415147,ENSP00000481791,ENSP00000440909,ENSP00000482174"
DISC1|TSNAX-DISC1	-0.0140045	0.990205	1.05236	0.195114	1.64533	0.0334087	PH_hs_0049730	Homo sapiens disrupted in schizophrenia 1 (DISC1)|Homo sapiens TSNAX-DISC1 readthrough (NMD candidate)	4	27185|100303453	"NM_001164555,NM_001164551|NR_028400"	"NP_001158027.1,NP_001158023.1|-"	ENSG00000162946	"ENST00000317586,ENST00000602873,ENST00000602700,ENST00000602822,ENST00000535944,ENST00000539444,ENST00000295051,ENST00000602281,ENST00000366633,ENST00000366632,ENST00000602713,ENST00000366636,ENST00000628350,ENST00000535983,ENST00000366637,ENST00000439617,ENST00000422590,ENST00000468399,ENST00000602600,ENST00000427560,ENST00000622252,ENST00000537876,ENST00000620189"	"ENSP00000320784,ENSP00000473386,ENSP00000473417,ENSP00000473586,ENSP00000441193,ENSP00000440953,ENSP00000295051,ENSP00000473425,ENSP00000355593,ENSP00000355592,ENSP00000473261,ENSP00000355596,ENSP00000487190,ENSP00000443996,ENSP00000355597,ENSP00000403888,ENSP00000415147,ENSP00000481791,ENSP00000440909,ENSP00000482174"
DKFZP434I0714	-0.133741	0.715482	-0.602552	0.0251287	-0.0682265	0.898598	PH_hs_0008387	Homo sapiens uncharacterized protein DKFZP434I0714 (DKFZP434I0714)	1	54553	NR_033797	-	ENSG00000268471	ENST00000604157
DKFZp779M0652	0.0267819	0.899036	0.199549	0.0438943	-0.0273912	0.729216	PH_hs_0008465	Homo sapiens uncharacterized DKFZp779M0652 (DKFZp779M0652)	1	374387	NR_027134	-	ENSG00000205106	ENST00000378779
DLC1	0.259688	0.201042	0.892172	0.0300168	0.821593	0.0195573	PH_hs_0060602	Homo sapiens DLC1 Rho GTPase activating protein (DLC1)	1	10395	"NM_001164271,NM_006094,NM_182643"	"NP_001157743.1,NP_006085.2,NP_872584.2"	ENSG00000164741	"ENST00000276297,ENST00000358919,ENST00000510318,ENST00000512044,ENST00000520226,ENST00000521730,ENST00000513883,ENST00000510250,ENST00000509922,ENST00000503161,ENST00000515225,ENST00000506171,ENST00000316609,ENST00000511869,ENST00000517868,ENST00000631382,ENST00000517333,ENST00000529018"	"ENSP00000276297,ENSP00000351797,ENSP00000422595,ENSP00000428028,ENSP00000429537,ENSP00000321034,ENSP00000425878,ENSP00000473289,ENSP00000488100"
DLC1	0.259688	0.201042	0.892172	0.0300168	0.821593	0.0195573	PH_hs_0060602	Homo sapiens DLC1 Rho GTPase activating protein (DLC1)	1	10395	"NM_001164271,NM_006094,NM_182643"	"NP_001157743.1,NP_006085.2,NP_872584.2"	ENSG00000164741	"ENST00000276297,ENST00000358919,ENST00000510318,ENST00000512044,ENST00000520226,ENST00000521730,ENST00000513883,ENST00000510250,ENST00000509922,ENST00000503161,ENST00000515225,ENST00000506171,ENST00000316609,ENST00000511869,ENST00000517868,ENST00000631382,ENST00000517333,ENST00000529018"	"ENSP00000276297,ENSP00000351797,ENSP00000422595,ENSP00000428028,ENSP00000429537,ENSP00000321034,ENSP00000425878,ENSP00000473289,ENSP00000488100"
DLEU7	0.33552	0.173908	-0.123207	0.527604	-0.277396	0.040897	PH_hs_0045525	"Homo sapiens deleted in lymphocytic leukemia, 7 (DLEU7)"	1	220107	NM_198989	NP_945340.2	ENSG00000186047	"ENST00000443723,ENST00000400393,ENST00000504404"	"ENSP00000420976,ENSP00000427177"
DLG4	-0.0198149	0.902453	0.671831	0.0225414	0.475954	0.0785758	PH_hs_0002086	"Homo sapiens discs, large homolog 4 (Drosophila)"	1	1742	"NM_001365,NM_001128827"	"NP_001356.1,NP_001122299.1"	ENSG00000132535	"ENST00000489885,ENST00000399506,ENST00000302955,ENST00000399510,ENST00000491753,ENST00000485100,ENST00000451807,ENST00000447163,ENST00000486626,ENST00000493294"	"ENSP00000382425,ENSP00000307471,ENSP00000382428,ENSP00000467897,ENSP00000460625,ENSP00000407918,ENSP00000388122,ENSP00000465720,ENSP00000465789"
DLL3	0.0901792	0.444199	0.513319	0.0326748	0.601842	0.00752005	PH_hs_0007348	Homo sapiens delta-like 3 (Drosophila)	1	10683	NM_016941	NP_058637.1	ENSG00000090932	"ENST00000600437,ENST00000356433,ENST00000596614,ENST00000600579,ENST00000205143"	"ENSP00000348810,ENSP00000471688,ENSP00000205143"
DLL3	0.0901792	0.444199	0.513319	0.0326748	0.601842	0.00752005	PH_hs_0007348	Homo sapiens delta-like 3 (Drosophila)	1	10683	NM_016941	NP_058637.1	ENSG00000090932	"ENST00000600437,ENST00000356433,ENST00000596614,ENST00000600579,ENST00000205143"	"ENSP00000348810,ENSP00000471688,ENSP00000205143"
DLX1	7.13e-05	0.999702	-0.401944	0.0348757	-0.40319	0.0579537	PH_hs_0033168	Homo sapiens distal-less homeobox 1 (DLX1)	1	1745	"NM_001038493,NM_178120"	"NP_001033582.1,NP_835221.2"	ENSG00000144355	"ENST00000361609,ENST00000469444,ENST00000361725,ENST00000341900,ENST00000409492,ENST00000475989,ENST00000550686"	"ENSP00000354865,ENSP00000448827,ENSP00000354478,ENSP00000341786"
DLX1	0.0922126	0.434153	0.551898	0.00807421	0.464795	0.0158256	PH_hs_0060673	Homo sapiens distal-less homeobox 1 (DLX1)	1	1745	"NM_001038493,NM_178120"	"NP_001033582.1,NP_835221.2"	ENSG00000144355	"ENST00000361609,ENST00000469444,ENST00000361725,ENST00000341900,ENST00000409492,ENST00000475989,ENST00000550686"	"ENSP00000354865,ENSP00000448827,ENSP00000354478,ENSP00000341786"
DLX1	0.0922126	0.434153	0.551898	0.00807421	0.464795	0.0158256	PH_hs_0060673	Homo sapiens distal-less homeobox 1 (DLX1)	1	1745	"NM_001038493,NM_178120"	"NP_001033582.1,NP_835221.2"	ENSG00000144355	"ENST00000361609,ENST00000469444,ENST00000361725,ENST00000341900,ENST00000409492,ENST00000475989,ENST00000550686"	"ENSP00000354865,ENSP00000448827,ENSP00000354478,ENSP00000341786"
DMD	0.0632446	0.898632	0.261763	0.681069	0.710097	0.0143322	PH_hs_0044648	Homo sapiens dystrophin (DMD)	1	1756	NM_004019	NP_004010.1	ENSG00000198947	"ENST00000481143,ENST00000378723,ENST00000358062,ENST00000378677,ENST00000357033,ENST00000378702,ENST00000474231,ENST00000361471,ENST00000378680,ENST00000378705,ENST00000475732,ENST00000469142,ENST00000445312,ENST00000471779,ENST00000488902,ENST00000493412,ENST00000420596,ENST00000448370,ENST00000288447,ENST00000480751,ENST00000447523,ENST00000472681,ENST00000472266,ENST00000463609,ENST0000037870…	"ENSP00000367997,ENSP00000350765,ENSP00000367948,ENSP00000354923,ENSP00000367974,ENSP00000417123,ENSP00000354464,ENSP00000367951,ENSP00000367977,ENSP00000417075,ENSP00000417725,ENSP00000399897,ENSP00000388559,ENSP00000288447,ENSP00000395904,ENSP00000367979,ENSP00000340057,ENSP00000444119,ENSP00000352894,ENSP00000479270,ENSP00000478150"
DMKN	-0.028733	0.809664	0.334775	0.0537468	0.232726	0.281165	PH_hs_0028380	Homo sapiens dermokine (DMKN)	1	93099	"NM_001190347,NM_001126059,NM_001126056,NM_033317,NM_001035516,NR_033746"	"NP_001177276.1,NP_001119531.1,NP_001119528.2,NP_201574.3,NP_001030593.1,-"	ENSG00000161249	"ENST00000472365,ENST00000408915,ENST00000460327,ENST00000434389,ENST00000488542,ENST00000402589,ENST00000462721,ENST00000339686,ENST00000488762,ENST00000490622,ENST00000436012,ENST00000467532,ENST00000414866,ENST00000480502,ENST00000469960,ENST00000467637,ENST00000601368,ENST00000478648,ENST00000486756,ENST00000484064,ENST00000429837,ENST00000419602,ENST00000462126,ENST00000443640,ENST0000059721…	"ENSP00000386225,ENSP00000473734,ENSP00000388378,ENSP00000384509,ENSP00000470881,ENSP00000342012,ENSP00000470033,ENSP00000470425,ENSP00000412075,ENSP00000470510,ENSP00000392222,ENSP00000472349,ENSP00000471112,ENSP00000405503,ENSP00000391036,ENSP00000406864,ENSP00000474491,ENSP00000473341,ENSP00000471968,ENSP00000471487,ENSP00000473526,ENSP00000474419,ENSP00000471288,ENSP00000468987,ENSP0000047212…
DMPK	-0.213382	0.0541755	-0.213382	0.0468711	-0.158182	0.129299	PH_hs_0060612	Homo sapiens dystrophia myotonica-protein kinase (DMPK)	1	1760	"NM_001081563,NM_001081562,NM_001081560,NM_004409"	"NP_001075032.1,NP_001075031.1,NP_001075029.1,NP_004400.4"	ENSG00000104936	"ENST00000291270,ENST00000588522,ENST00000596686,ENST00000600757,ENST00000343373,ENST00000447742,ENST00000458663,ENST00000598272,ENST00000354227,ENST00000593574,ENST00000597660,ENST00000600370,ENST00000595361,ENST00000599002,ENST00000598191,ENST00000596920,ENST00000598180,ENST00000596067,ENST00000599392,ENST00000618091"	"ENSP00000291270,ENSP00000468013,ENSP00000472965,ENSP00000345997,ENSP00000413417,ENSP00000401753,ENSP00000346168,ENSP00000469220,ENSP00000471832,ENSP00000470192,ENSP00000482746"
DMPK	-0.213382	0.0541755	-0.213382	0.0468711	-0.158182	0.129299	PH_hs_0060612	Homo sapiens dystrophia myotonica-protein kinase (DMPK)	1	1760	"NM_001081563,NM_001081562,NM_001081560,NM_004409"	"NP_001075032.1,NP_001075031.1,NP_001075029.1,NP_004400.4"	ENSG00000104936	"ENST00000291270,ENST00000588522,ENST00000596686,ENST00000600757,ENST00000343373,ENST00000447742,ENST00000458663,ENST00000598272,ENST00000354227,ENST00000593574,ENST00000597660,ENST00000600370,ENST00000595361,ENST00000599002,ENST00000598191,ENST00000596920,ENST00000598180,ENST00000596067,ENST00000599392,ENST00000618091"	"ENSP00000291270,ENSP00000468013,ENSP00000472965,ENSP00000345997,ENSP00000413417,ENSP00000401753,ENSP00000346168,ENSP00000469220,ENSP00000471832,ENSP00000470192,ENSP00000482746"
DMRTC1|DMRTC1B	-0.55544	0.580121	0.423196	0.372157	0.6853	0.0521901	PH_hs_0018141	Homo sapiens DMRT-like family C1 (DMRTC1)|Homo sapiens DMRT-like family C1B (DMRTC1B)	4	63947|728656	NM_033053|NM_001080851	NP_149042.2|NP_001074320.1	ENSG00000269502|ENSG00000184911	"ENST00000615063|ENST00000472595,ENST00000334036,ENST00000440247,ENST00000373533,ENST00000438696,ENST00000481112,ENST00000373532"	"ENSP00000484718|ENSP00000435159,ENSP00000334501,ENSP00000397859,ENSP00000362633,ENSP00000404476,ENSP00000434020,ENSP00000362632"
DMRTC2	-0.0995377	0.805538	-0.033639	0.901358	-0.589485	0.0274852	PH_hs_0016885	Homo sapiens DMRT-like family C2 (DMRTC2)	1	63946	NM_001040283	NP_001035373.1	ENSG00000142025	"ENST00000601660,ENST00000600017,ENST00000596827,ENST00000602098,ENST00000269945,ENST00000596258,ENST00000596660,ENST00000599022"	"ENSP00000472159,ENSP00000472488,ENSP00000469525,ENSP00000269945,ENSP00000472215,ENSP00000470553"
DNAH1	-0.286758	0.0400714	-0.501386	0.0294821	-0.278794	0.0434201	PH_hs_0030977	"Homo sapiens dynein, axonemal, heavy chain 1 (DNAH1)"	1	25981	NM_015512	NP_056327.4	ENSG00000114841	"ENST00000486752,ENST00000420323,ENST00000497875,ENST00000466628,ENST00000488988,ENST00000490713,ENST00000480649,ENST00000487254"	"ENSP00000401514,ENSP00000419071,ENSP00000418688"
DNAH1	-0.286758	0.0400714	-0.501386	0.0294821	-0.278794	0.0434201	PH_hs_0030977	"Homo sapiens dynein, axonemal, heavy chain 1 (DNAH1)"	1	25981	NM_015512	NP_056327.4	ENSG00000114841	"ENST00000486752,ENST00000420323,ENST00000497875,ENST00000466628,ENST00000488988,ENST00000490713,ENST00000480649,ENST00000487254"	"ENSP00000401514,ENSP00000419071,ENSP00000418688"
DNAH1	-0.286758	0.0400714	-0.501386	0.0294821	-0.278794	0.0434201	PH_hs_0030977	"Homo sapiens dynein, axonemal, heavy chain 1 (DNAH1)"	1	25981	NM_015512	NP_056327.4	ENSG00000114841	"ENST00000486752,ENST00000420323,ENST00000497875,ENST00000466628,ENST00000488988,ENST00000490713,ENST00000480649,ENST00000487254"	"ENSP00000401514,ENSP00000419071,ENSP00000418688"
DNAH5	-0.219277	0.814636	-1.3143	0.127065	-1.71471	0.0389649	PH_hs_0042164	"Homo sapiens dynein, axonemal, heavy chain 5 (DNAH5)"	1	1767	NM_001369	NP_001360.1	ENSG00000039139	"ENST00000265104,ENST00000504001,ENST00000512443,ENST00000508040"	ENSP00000265104
DNAJB12	-0.278588	0.222094	-0.293209	0.0373029	-0.119966	0.140795	PH_hs_0000830	Homo sapiens DnaJ (Hsp40)	1	54788	"NM_017626,NM_001002762"	"NP_060096.3,NP_001002762.2"	ENSG00000148719	"ENST00000444643,ENST00000461919,ENST00000463786,ENST00000473051,ENST00000394903,ENST00000338820"	"ENSP00000403313,ENSP00000476453,ENSP00000476941,ENSP00000378363,ENSP00000345575"
DNAJB12	-0.217744	0.045891	-0.255497	0.118628	-0.267262	0.0778303	PH_hs_0030954	Homo sapiens DnaJ (Hsp40)	1	54788	"NM_017626,NM_001002762"	"NP_060096.3,NP_001002762.2"	ENSG00000148719	"ENST00000444643,ENST00000461919,ENST00000463786,ENST00000473051,ENST00000394903,ENST00000338820"	"ENSP00000403313,ENSP00000476453,ENSP00000476941,ENSP00000378363,ENSP00000345575"
DNAJB14	0.0335553	0.779873	-0.272372	0.0298679	-0.171523	0.0983591	PH_hs_0028640	Homo sapiens DnaJ (Hsp40)	1	79982	NM_001031723	NP_001026893.1	ENSG00000164031	"ENST00000442697,ENST00000420137,ENST00000471101,ENST00000334223,ENST00000455208,ENST00000398991,ENST00000426476,ENST00000474664,ENST00000493110,ENST00000471738,ENST00000469942,ENST00000610281"	"ENSP00000404381,ENSP00000416179,ENSP00000335249,ENSP00000389471,ENSP00000390023,ENSP00000390019,ENSP00000480565"
DNAJB3	-0.609238	0.281513	-1.81544	0.00375879	-0.917387	0.163784	PH_hs_0060030	Homo sapiens DnaJ (Hsp40)	1	414061	NM_001001394	NP_001001394.1	NA	NA	NA
DNAJB3|LOC100286922	0.33268	0.158875	0.637497	0.037998	0.771005	0.0322162	PH_hs_0006975	Homo sapiens DnaJ (Hsp40)|Homo sapiens DnaJ (Hsp40)	4	414061|100286922	NM_001001394|NR_037694	NP_001001394.1|-	ENSG00000178836	"ENST00000421868,ENST00000389816,ENST00000450901,ENST00000449669"
DNAJB3|LOC100286922	0.33268	0.158875	0.637497	0.037998	0.771005	0.0322162	PH_hs_0006975	Homo sapiens DnaJ (Hsp40)|Homo sapiens DnaJ (Hsp40)	4	414061|100286922	NM_001001394|NR_037694	NP_001001394.1|-	ENSG00000178836	"ENST00000421868,ENST00000389816,ENST00000450901,ENST00000449669"
DNAJB7	0.799498	0.050578	0.970694	0.0437904	0.598026	0.128986	PH_hs_0034911	Homo sapiens DnaJ (Hsp40)	1	150353	NM_145174	NP_660157.1	ENSG00000172404	ENST00000307221	ENSP00000307197
DNAJB7	0.799498	0.050578	0.970694	0.0437904	0.598026	0.128986	PH_hs_0034911	Homo sapiens DnaJ (Hsp40)	1	150353	NM_145174	NP_660157.1	ENSG00000172404	ENST00000307221	ENSP00000307197
DNAJC1	-0.134217	0.157498	-0.30042	0.155087	-0.415745	0.00898369	PH_hs_0001252	Homo sapiens DnaJ (Hsp40)	1	64215	NM_022365	NP_071760.2	ENSG00000136770	"ENST00000376980,ENST00000483085,ENST00000476103,ENST00000447548,ENST00000376946"	"ENSP00000366179,ENSP00000431248"
DNAJC16	-0.0871608	0.47931	-0.725833	0.0437081	-0.760357	0.0621598	PH_hs_0036175	Homo sapiens DnaJ (Hsp40)	1	23341	NM_015291	NP_056106.1	ENSG00000116138	"ENST00000375838,ENST00000375847,ENST00000475133,ENST00000375849,ENST00000483270,ENST00000472665,ENST00000479655,ENST00000490811,ENST00000495523,ENST00000616884"	"ENSP00000364998,ENSP00000365007,ENSP00000431886,ENSP00000365009,ENSP00000431982,ENSP00000480224"
DNAJC22	-0.293049	0.594773	-0.225225	0.811427	0.607658	0.053264	PH_hs_0023031	Homo sapiens DnaJ (Hsp40)	1	79962	NM_024902	NP_079178.2	ENSG00000178401	"ENST00000549441,ENST00000395069,ENST00000551153,ENST00000552651"	"ENSP00000446830,ENSP00000378508"
DNAJC5B	0.304569	0.0226164	-0.0798566	0.284413	0.0253547	0.858682	PH_hs_0008403	Homo sapiens DnaJ (Hsp40)	1	85479	NM_033105	NP_149096.2	ENSG00000147570	"ENST00000524076,ENST00000276570,ENST00000519330,ENST00000522619"	"ENSP00000276570,ENSP00000430196"
DNAJC5G	0.143567	0.269337	0.570036	0.0583861	0.474477	0.0154745	PH_hs_0006366	Homo sapiens DnaJ (Hsp40)	1	285126	NM_173650	NP_775921.1	ENSG00000163793	"ENST00000296097,ENST00000420191,ENST00000402462,ENST00000404433,ENST00000406962,ENST00000460358"	"ENSP00000296097,ENSP00000400382,ENSP00000384305,ENSP00000385829,ENSP00000385533"
DNAJC9-AS1	0.317068	0.143079	0.813445	0.017095	0.916476	0.0112928	PH_hs_0020269	Homo sapiens DNAJC9 antisense RNA 1 (DNAJC9-AS1)	1	414245	NR_038373	-	ENSG00000236756	"ENST00000440197,ENST00000513954"
DNAJC9-AS1	0.317068	0.143079	0.813445	0.017095	0.916476	0.0112928	PH_hs_0020269	Homo sapiens DNAJC9 antisense RNA 1 (DNAJC9-AS1)	1	414245	NR_038373	-	ENSG00000236756	"ENST00000440197,ENST00000513954"
DNAL1	0.417101	0.0665175	0.633584	0.0280245	0.469878	0.0295965	PH_hs_0061224	"Homo sapiens dynein, axonemal, light chain 1 (DNAL1)"	1	83544	"NM_031427,NM_001201366"	"NP_113615.2,NP_001188295.1"	ENSG00000119661	"ENST00000554113,ENST00000555631,ENST00000553645,ENST00000311089,ENST00000555919,ENST00000554339,ENST00000554871,ENST00000559993,ENST00000554159"	"ENSP00000452368,ENSP00000451547,ENSP00000452037,ENSP00000310360,ENSP00000451101,ENSP00000450744,ENSP00000451834,ENSP00000453439,ENSP00000451264"
DNAL1	0.417101	0.0665175	0.633584	0.0280245	0.469878	0.0295965	PH_hs_0061224	"Homo sapiens dynein, axonemal, light chain 1 (DNAL1)"	1	83544	"NM_031427,NM_001201366"	"NP_113615.2,NP_001188295.1"	ENSG00000119661	"ENST00000554113,ENST00000555631,ENST00000553645,ENST00000311089,ENST00000555919,ENST00000554339,ENST00000554871,ENST00000559993,ENST00000554159"	"ENSP00000452368,ENSP00000451547,ENSP00000452037,ENSP00000310360,ENSP00000451101,ENSP00000450744,ENSP00000451834,ENSP00000453439,ENSP00000451264"
DND1	-0.969174	0.0480333	-1.059	0.125932	-0.818399	0.325523	PH_hs_0049676	Homo sapiens DND microRNA-mediated repression inhibitor 1 (DND1)	1	373863	NM_194249	NP_919225.1	ENSG00000256453	ENST00000542735	ENSP00000445366
DNM3	0.234019	0.106712	0.458496	0.157548	0.582157	0.00901663	PH_hs_0023819	Homo sapiens dynamin 3 (DNM3)	1	26052	"NM_015569,NM_001136127"	"NP_056384.2,NP_001129599.1"	ENSG00000197959	"ENST00000367733,ENST00000355305,ENST00000627582,ENST00000367731,ENST00000520906,ENST00000523513,ENST00000485254,ENST00000491124"	"ENSP00000356707,ENSP00000347457,ENSP00000486701,ENSP00000356705,ENSP00000429701,ENSP00000429416,ENSP00000429165"
DOC2GP	-0.13122	0.449288	0.231669	0.650279	0.541305	0.0355286	PH_hs_0046553	"Homo sapiens double C2-like domains, gamma, pseudogene (DOC2GP)"	1	390213	NR_033791	-	NA	NA	NA
DOLK	0.0013036	0.993454	-0.315232	0.146508	-0.525689	0.0223149	PH_hs_0026195	Homo sapiens dolichol kinase (DOLK)	1	22845	NM_014908	NP_055723.1	ENSG00000175283	ENST00000372586	ENSP00000361667
DOLPP1	0.0360957	0.939557	0.615163	0.0674648	0.78216	0.0390253	PH_hs_0031059	Homo sapiens dolichyldiphosphatase 1 (DOLPP1)	1	57171	"NR_072983,NM_001135917,NM_020438"	"-,NP_001129389.1,NP_065171.2"	ENSG00000167130	"ENST00000372546,ENST00000406974,ENST00000327812,ENST00000412363,ENST00000480255"	"ENSP00000361625,ENSP00000384043,ENSP00000333294,ENSP00000403278"
DPP9	0.187719	0.195985	0.774214	0.0121081	1.07315	0.00297228	PH_hs_0040217	Homo sapiens dipeptidyl-peptidase 9 (DPP9)	1	91039	NM_139159	NP_631898.3	ENSG00000142002	"ENST00000594671,ENST00000262960,ENST00000597145,ENST00000601720,ENST00000598800,ENST00000597900,ENST00000601173,ENST00000595327,ENST00000597253,ENST00000599998,ENST00000599163,ENST00000597849,ENST00000601764,ENST00000597726,ENST00000600621,ENST00000600556,ENST00000602161,ENST00000598360,ENST00000598041,ENST00000601130,ENST00000595940,ENST00000599248,ENST00000593973,ENST00000600497,ENST0000059702…	"ENSP00000472224,ENSP00000262960,ENSP00000469187,ENSP00000469603,ENSP00000472968,ENSP00000471954,ENSP00000471659,ENSP00000472430,ENSP00000473175,ENSP00000472549,ENSP00000470393,ENSP00000473130,ENSP00000471250,ENSP00000469152,ENSP00000471629,ENSP00000469020,ENSP00000469282"
DPP9	0.187719	0.195985	0.774214	0.0121081	1.07315	0.00297228	PH_hs_0040217	Homo sapiens dipeptidyl-peptidase 9 (DPP9)	1	91039	NM_139159	NP_631898.3	ENSG00000142002	"ENST00000594671,ENST00000262960,ENST00000597145,ENST00000601720,ENST00000598800,ENST00000597900,ENST00000601173,ENST00000595327,ENST00000597253,ENST00000599998,ENST00000599163,ENST00000597849,ENST00000601764,ENST00000597726,ENST00000600621,ENST00000600556,ENST00000602161,ENST00000598360,ENST00000598041,ENST00000601130,ENST00000595940,ENST00000599248,ENST00000593973,ENST00000600497,ENST0000059702…	"ENSP00000472224,ENSP00000262960,ENSP00000469187,ENSP00000469603,ENSP00000472968,ENSP00000471954,ENSP00000471659,ENSP00000472430,ENSP00000473175,ENSP00000472549,ENSP00000470393,ENSP00000473130,ENSP00000471250,ENSP00000469152,ENSP00000471629,ENSP00000469020,ENSP00000469282"
DPPA3	-0.0518566	0.699979	0.0469807	0.658734	-0.204913	0.0537512	PH_hs_0060506	Homo sapiens developmental pluripotency associated 3 (DPPA3)	1	359787	NM_199286	NP_954980.1	ENSG00000187569	ENST00000345088	ENSP00000339250
DPRX	-0.222324	0.407596	0.460837	0.0107646	-0.455215	0.534208	PH_hs_0049693	Homo sapiens divergent-paired related homeobox (DPRX)	1	503834	NM_001012728	NP_001012746.1	ENSG00000204595	ENST00000376650	ENSP00000365838
DPY19L1	-0.151586	0.327888	-0.238125	0.0461721	-0.172598	0.123762	PH_hs_0024760	Homo sapiens dpy-19-like 1 (C. elegans)	1	23333	NM_015283	NP_056098.1	ENSG00000173852	"ENST00000310974,ENST00000428054,ENST00000446375,ENST00000493989,ENST00000462134,ENST00000463538,ENST00000481923,ENST00000612226"	"ENSP00000308695,ENSP00000412745,ENSP00000400510,ENSP00000478865"
DPY19L2|DPY19L2P4	0.40154	0.610633	0.682067	0.0715566	2.02422	0.00625549	PH_hs_0049673	Homo sapiens dpy-19-like 2 (C. elegans)|Homo sapiens DPY19L2 pseudogene 4 (DPY19L2P4)	4	283417|442523	NM_173812|NR_003551	NP_776173.3|-	ENSG00000177990|ENSG00000235436	"ENST00000324472,ENST00000541911,ENST00000413230,ENST00000439061,ENST00000306389,ENST00000541083,ENST00000536494,ENST00000538147,ENST00000542209|ENST00000497063,ENST00000479881"	"ENSP00000315988,ENSP00000437474,ENSP00000445878,ENSP00000443126,ENSP00000439567,ENSP00000444932|"
DPY19L4	-0.0232437	0.875631	-0.392069	0.0443558	-0.25762	0.34565	PH_hs_0043136	Homo sapiens dpy-19-like 4 (C. elegans)	1	286148	NM_181787	NP_861452.2	ENSG00000156162	"ENST00000522422,ENST00000520774,ENST00000414645,ENST00000519353,ENST00000519176,ENST00000521525,ENST00000523020,ENST00000522669"	"ENSP00000428762,ENSP00000430162,ENSP00000389630,ENSP00000428041,ENSP00000430417,ENSP00000429559,ENSP00000429785,ENSP00000429711"
DPY19L4	0.107076	0.583232	-0.245373	0.0285382	-0.353249	0.134013	PH_hs_0041019	Homo sapiens dpy-19-like 4 (C. elegans)	1	286148	NM_181787	NP_861452.2	ENSG00000156162	"ENST00000522422,ENST00000520774,ENST00000414645,ENST00000519353,ENST00000519176,ENST00000521525,ENST00000523020,ENST00000522669"	"ENSP00000428762,ENSP00000430162,ENSP00000389630,ENSP00000428041,ENSP00000430417,ENSP00000429559,ENSP00000429785,ENSP00000429711"
DPYS	-0.164028	0.428701	-0.818911	0.0276245	-0.683511	0.11152	PH_hs_0025885	Homo sapiens dihydropyrimidinase (DPYS)	1	1807	NM_001385	NP_001376.1	ENSG00000147647	"ENST00000521601,ENST00000351513,ENST00000520806,ENST00000533874,ENST00000520483,ENST00000521372,ENST00000519217,ENST00000521573"	"ENSP00000276651,ENSP00000436654,ENSP00000430246"
DPYSL5	-0.379482	0.681631	-1.77894	0.0229207	-0.660175	0.618081	PH_hs_0061019	Homo sapiens dihydropyrimidinase-like 5 (DPYSL5)	1	56896	"NM_001253724,NM_001253723,NM_020134"	"NP_001240653.1,NP_001240652.1,NP_064519.2"	ENSG00000157851	"ENST00000450961,ENST00000288699,ENST00000401478,ENST00000431402,ENST00000434719,ENST00000484882,ENST00000614712"	"ENSP00000407174,ENSP00000288699,ENSP00000385549,ENSP00000399581,ENSP00000413075,ENSP00000481305"
DPYSL5	-0.637077	0.516426	-1.22675	0.17414	-1.88579	0.0351888	PH_hs_0048239	Homo sapiens dihydropyrimidinase-like 5 (DPYSL5)	1	56896	"NM_001253724,NM_001253723,NM_020134"	"NP_001240653.1,NP_001240652.1,NP_064519.2"	ENSG00000157851	"ENST00000450961,ENST00000288699,ENST00000401478,ENST00000431402,ENST00000434719,ENST00000484882,ENST00000614712"	"ENSP00000407174,ENSP00000288699,ENSP00000385549,ENSP00000399581,ENSP00000413075,ENSP00000481305"
DPYSL5	0.0373869	0.937435	0.51	0.352585	0.799485	0.0017455	PH_hs_0015441	Homo sapiens dihydropyrimidinase-like 5 (DPYSL5)	1	56896	"NM_001253724,NM_001253723,NM_020134"	"NP_001240653.1,NP_001240652.1,NP_064519.2"	ENSG00000157851	"ENST00000450961,ENST00000288699,ENST00000401478,ENST00000431402,ENST00000434719,ENST00000484882,ENST00000614712"	"ENSP00000407174,ENSP00000288699,ENSP00000385549,ENSP00000399581,ENSP00000413075,ENSP00000481305"
DRD2	-0.236093	0.0347996	-0.431515	0.00583663	-0.431515	0.00447627	PH_hs_0004224	Homo sapiens dopamine receptor D2 (DRD2)	1	1813	"NM_016574,NM_000795"	"NP_057658.2,NP_000786.1"	ENSG00000149295	"ENST00000346454,ENST00000362072,ENST00000544518,ENST00000542968,ENST00000538967,ENST00000540600,ENST00000535984,ENST00000539420,ENST00000543292,ENST00000542616"	"ENSP00000278597,ENSP00000354859,ENSP00000441068,ENSP00000442172,ENSP00000438215,ENSP00000438419,ENSP00000441474"
DRD2	-0.236093	0.0347996	-0.431515	0.00583663	-0.431515	0.00447627	PH_hs_0004224	Homo sapiens dopamine receptor D2 (DRD2)	1	1813	"NM_016574,NM_000795"	"NP_057658.2,NP_000786.1"	ENSG00000149295	"ENST00000346454,ENST00000362072,ENST00000544518,ENST00000542968,ENST00000538967,ENST00000540600,ENST00000535984,ENST00000539420,ENST00000543292,ENST00000542616"	"ENSP00000278597,ENSP00000354859,ENSP00000441068,ENSP00000442172,ENSP00000438215,ENSP00000438419,ENSP00000441474"
DRD2	-0.236093	0.0347996	-0.431515	0.00583663	-0.431515	0.00447627	PH_hs_0004224	Homo sapiens dopamine receptor D2 (DRD2)	1	1813	"NM_016574,NM_000795"	"NP_057658.2,NP_000786.1"	ENSG00000149295	"ENST00000346454,ENST00000362072,ENST00000544518,ENST00000542968,ENST00000538967,ENST00000540600,ENST00000535984,ENST00000539420,ENST00000543292,ENST00000542616"	"ENSP00000278597,ENSP00000354859,ENSP00000441068,ENSP00000442172,ENSP00000438215,ENSP00000438419,ENSP00000441474"
DSC2	-0.530392	0.203454	-0.882326	0.333306	-1.5103	0.0209206	PH_hs_0048544	Homo sapiens desmocollin 2 (DSC2)	1	1824	"NM_004949,NM_024422"	"NP_004940.1,NP_077740.1"	ENSG00000134755	"ENST00000280904,ENST00000251081"	"ENSP00000280904,ENSP00000251081"
DSC2	0.0760461	0.720026	0.522967	0.0167654	0.427743	0.0372387	PH_hs_0022220	Homo sapiens desmocollin 2 (DSC2)	1	1824	"NM_004949,NM_024422"	"NP_004940.1,NP_077740.1"	ENSG00000134755	"ENST00000280904,ENST00000251081"	"ENSP00000280904,ENSP00000251081"
DSC2	0.0760461	0.720026	0.522967	0.0167654	0.427743	0.0372387	PH_hs_0022220	Homo sapiens desmocollin 2 (DSC2)	1	1824	"NM_004949,NM_024422"	"NP_004940.1,NP_077740.1"	ENSG00000134755	"ENST00000280904,ENST00000251081"	"ENSP00000280904,ENSP00000251081"
DSCR4	0.36837	0.0139533	0.364582	0.293067	-0.557936	0.577188	PH_hs_0002046	Homo sapiens Down syndrome critical region 4 (DSCR4)	1	10281	NM_005867	NP_005858.1	ENSG00000184029	"ENST00000398948,ENST00000328264,ENST00000482032"	"ENSP00000381921,ENSP00000328676,ENSP00000434191"
DSCR8	-0.18806	0.267574	0.341334	0.268423	0.38362	0.0256003	PH_hs_0011337	Homo sapiens Down syndrome critical region 8 (DSCR8)	1	84677	"NR_026839,NR_026838,NR_026842,NR_026841,NR_026840"	"-,-,-,-,-"	ENSG00000198054	"ENST00000478613,ENST00000469658,ENST00000400477,ENST00000495344,ENST00000465532,ENST00000357704,ENST00000472602,ENST00000614538"	"ENSP00000383325,ENSP00000350336,ENSP00000480061"
DSG3	-0.124418	0.694556	0.262993	0.446739	-0.917615	0.051799	PH_hs_0000256	Homo sapiens desmoglein 3 (DSG3)	1	1830	NM_001944	NP_001935.2	ENSG00000134757	ENST00000257189	ENSP00000257189
DST	-0.439635	0.0395694	-0.160592	0.602846	-0.330218	0.133698	PH_hs_0045107	Homo sapiens dystonin (DST)	1	667	NM_001723	NP_001714.1	ENSG00000151914	"ENST00000244364,ENST00000370788,ENST00000523292,ENST00000518464,ENST00000466429,ENST00000482156,ENST00000361203,ENST00000523597,ENST00000524216,ENST00000523943,ENST00000492944,ENST00000517840,ENST00000487754,ENST00000459869,ENST00000340834,ENST00000524186,ENST00000520144,ENST00000518398,ENST00000439203,ENST00000520645,ENST00000370765,ENST00000522360,ENST00000518935,ENST00000523967,ENST0000052110…	"ENSP00000244364,ENSP00000359824,ENSP00000431020,ENSP00000354508,ENSP00000430472,ENSP00000431121,ENSP00000404924,ENSP00000431030,ENSP00000359801,ENSP00000428068,ENSP00000431003,ENSP00000393082,ENSP00000488192,ENSP00000429075,ENSP00000429221,ENSP00000307959,ENSP00000359790,ENSP00000400883"
DTNBP1	-0.493243	0.125827	-0.965614	0.0321429	-1.00676	0.0188742	PH_hs_0044628	Homo sapiens dystrobrevin binding protein 1 (DTNBP1)	1	84062	"NM_001271669,NM_001271668,NM_001271667,NM_032122"	"NP_001258598.1,NP_001258597.1,NP_001258596.1,NP_115498.2"	ENSG00000047579	"ENST00000344537,ENST00000462989,ENST00000510395,ENST00000515875,ENST00000513680,ENST00000509674,ENST00000338950,ENST00000506844,ENST00000514651,ENST00000511762,ENST00000622898,ENST00000355917"	"ENSP00000341680,ENSP00000427239,ENSP00000424685,ENSP00000425495,ENSP00000424357,ENSP00000421797,ENSP00000344718,ENSP00000424202,ENSP00000427473,ENSP00000481997,ENSP00000348183"
DTNBP1	-0.493243	0.125827	-0.965614	0.0321429	-1.00676	0.0188742	PH_hs_0044628	Homo sapiens dystrobrevin binding protein 1 (DTNBP1)	1	84062	"NM_001271669,NM_001271668,NM_001271667,NM_032122"	"NP_001258598.1,NP_001258597.1,NP_001258596.1,NP_115498.2"	ENSG00000047579	"ENST00000344537,ENST00000462989,ENST00000510395,ENST00000515875,ENST00000513680,ENST00000509674,ENST00000338950,ENST00000506844,ENST00000514651,ENST00000511762,ENST00000622898,ENST00000355917"	"ENSP00000341680,ENSP00000427239,ENSP00000424685,ENSP00000425495,ENSP00000424357,ENSP00000421797,ENSP00000344718,ENSP00000424202,ENSP00000427473,ENSP00000481997,ENSP00000348183"
DTWD2	0.262533	0.147283	0.395535	0.0415893	0.369741	0.0885598	PH_hs_0043873	Homo sapiens DTW domain containing 2 (DTWD2)	1	285605	NM_173666	NP_775937.1	ENSG00000169570	"ENST00000304058,ENST00000510708,ENST00000515439,ENST00000506980"	"ENSP00000302892,ENSP00000425048,ENSP00000424221,ENSP00000425016"
DTX3	-0.13888	0.872902	-2.2338	0.0201469	-0.412523	0.687483	PH_hs_0002737	"Homo sapiens deltex 3, E3 ubiquitin ligase (DTX3)"	1	196403	NM_178502	NP_848597.1	ENSG00000178498	"ENST00000548804,ENST00000550596,ENST00000551835,ENST00000549583,ENST00000337737,ENST00000548198,ENST00000551632,ENST00000548478,ENST00000550300"	"ENSP00000449294,ENSP00000449118,ENSP00000449950,ENSP00000449688,ENSP00000338050,ENSP00000447873,ENSP00000448696,ENSP00000448224,ENSP00000446996"
DUOX1	0.397467	0.0781833	0.626868	0.052816	0.422636	0.0929298	PH_hs_0014093	Homo sapiens dual oxidase 1 (DUOX1)	1	53905	"NM_017434,NM_175940"	"NP_059130.2,NP_787954.1"	ENSG00000137857	"ENST00000321429,ENST00000389037,ENST00000558322,ENST00000561220,ENST00000558991,ENST00000561166,ENST00000559219,ENST00000557893,ENST00000558446,ENST00000559716,ENST00000559221,ENST00000558744"	"ENSP00000317997,ENSP00000373689,ENSP00000454121,ENSP00000452623,ENSP00000454065"
DUPD1	-0.227881	0.438691	-0.50656	0.0179028	-0.50656	0.0167988	PH_hs_0042803	Homo sapiens dual specificity phosphatase and pro isomerase domain containing 1 (DUPD1)	1	338599	NM_001003892	NP_001003892.1	ENSG00000281660	ENST00000625469	ENSP00000487404
DUPD1	-0.227881	0.438691	-0.50656	0.0179028	-0.50656	0.0167988	PH_hs_0042803	Homo sapiens dual specificity phosphatase and pro isomerase domain containing 1 (DUPD1)	1	338599	NM_001003892	NP_001003892.1	ENSG00000281660	ENST00000625469	ENSP00000487404
DUS4L	-0.276766	0.0445906	-0.201077	0.0833134	-0.0327164	0.83621	PH_hs_0005321	Homo sapiens dihydrouridine synthase 4-like (S. cerevisiae)	1	11062	"NM_001270419,NM_181581,NR_073005,NR_073004,NR_073003,NR_073002"	"NP_001257348.1,NP_853559.1,-,-,-,-"	ENSG00000105865	"ENST00000498786,ENST00000422290,ENST00000265720,ENST00000431839,ENST00000443233,ENST00000436411,ENST00000458611,ENST00000467916,ENST00000471763,ENST00000497798,ENST00000485825"	"ENSP00000402887,ENSP00000265720,ENSP00000388904,ENSP00000388061,ENSP00000412739,ENSP00000399375"
DUSP23	0.245614	0.425112	-0.369669	0.421261	-0.71483	0.0322525	PH_hs_0042483	Homo sapiens dual specificity phosphatase 23 (DUSP23)	1	54935	NM_017823	NP_060293.2	ENSG00000158716	"ENST00000368109,ENST00000368108,ENST00000368107"	"ENSP00000357089,ENSP00000357088,ENSP00000357087"
DUSP4	0.0277562	0.960162	-1.10034	0.165577	-1.73406	0.00817754	PH_hs_0061492	Homo sapiens dual specificity phosphatase 4 (DUSP4)	1	1846	"NM_057158,NM_001394"	"NP_476499.1,NP_001385.1"	ENSG00000120875	"ENST00000240100,ENST00000240101"	"ENSP00000240100,ENSP00000240101"
DUSP6	0.302844	0.0495184	0.0973198	0.726676	-0.326358	0.0167371	PH_hs_0023584	Homo sapiens dual specificity phosphatase 6 (DUSP6)	1	1848	"NM_022652,NM_001946"	"NP_073143.2,NP_001937.2"	ENSG00000139318	"ENST00000279488,ENST00000308385,ENST00000547291,ENST00000547140,ENST00000548755"	"ENSP00000279488,ENSP00000307835,ENSP00000449838,ENSP00000446858"
DUSP6	0.302844	0.0495184	0.0973198	0.726676	-0.326358	0.0167371	PH_hs_0023584	Homo sapiens dual specificity phosphatase 6 (DUSP6)	1	1848	"NM_022652,NM_001946"	"NP_073143.2,NP_001937.2"	ENSG00000139318	"ENST00000279488,ENST00000308385,ENST00000547291,ENST00000547140,ENST00000548755"	"ENSP00000279488,ENSP00000307835,ENSP00000449838,ENSP00000446858"
DUSP7	-0.466612	0.0995219	-0.332909	0.0281648	-0.140328	0.364479	PH_hs_0047768	Homo sapiens dual specificity phosphatase 7 (DUSP7)	1	1849	NM_001947	NP_001938.2	ENSG00000164086	"ENST00000495880,ENST00000469623"	"ENSP00000417183,ENSP00000418566"
DUX1|DUX3|DUX5	0.0355699	0.789011	0.207947	0.499307	0.400623	0.0175369	PH_hs_0062730	Homo sapiens double homeobox 1 (DUX1)|Homo sapiens double homeobox 3 (DUX3)|Homo sapiens double homeobox 5 (DUX5)	4	26584|26582|26581	NM_012146|NM_012148|NM_012149	NP_036278.1|NP_036280.2|NP_036281.2
DZIP1	0.031269	0.968078	0.434608	0.0779009	1.02049	0.00743989	PH_hs_0060905	Homo sapiens DAZ interacting zinc finger protein 1 (DZIP1)	1	22873	"NM_198968,NM_014934"	"NP_945319.1,NP_055749.1"	ENSG00000134874	"ENST00000361396,ENST00000376829,ENST00000485031,ENST00000479518,ENST00000466569,ENST00000466027,ENST00000347108,ENST00000361156"	"ENSP00000355175,ENSP00000366025,ENSP00000431168,ENSP00000257312,ENSP00000355018"
DZIP1L	-0.0730587	0.809492	-0.376376	0.355523	-0.849242	0.0361748	PH_hs_0016979	Homo sapiens DAZ interacting zinc finger protein 1-like (DZIP1L)	1	199221	NM_173543	NP_775814.2	ENSG00000158163	"ENST00000327532,ENST00000486487,ENST00000488595,ENST00000469243,ENST00000466301,ENST00000473850,ENST00000490472,ENST00000467030,ENST00000492010"	"ENSP00000332148,ENSP00000417228,ENSP00000419486,ENSP00000420600,ENSP00000420051"
EBLN2	0.465077	0.0174535	-0.22685	0.0416877	0.0956722	0.601413	PH_hs_0034876	Homo sapiens endogenous Bornavirus-like nucleoprotein 2 (EBLN2)	1	55096	NM_018029	NP_060499.3	ENSG00000255423	ENST00000533473	ENSP00000432104
EBLN2	0.465077	0.0174535	-0.22685	0.0416877	0.0956722	0.601413	PH_hs_0034876	Homo sapiens endogenous Bornavirus-like nucleoprotein 2 (EBLN2)	1	55096	NM_018029	NP_060499.3	ENSG00000255423	ENST00000533473	ENSP00000432104
EDA2R	0.235509	0.0757451	0.646908	0.00335786	0.388294	0.245528	PH_hs_0048124	Homo sapiens ectodysplasin A2 receptor (EDA2R)	1	60401	"NM_021783,NM_001242310,NM_001199687"	"NP_068555.1,NP_001229239.1,NP_001186616.1"	ENSG00000131080	"ENST00000374719,ENST00000253392,ENST00000396050,ENST00000451436"	"ENSP00000363851,ENSP00000253392,ENSP00000379365,ENSP00000415242"
EDC3	2.6423	0.319053	5.38807	9.31e-06	5.26094	5.53e-06	PH_hs_0022396	Homo sapiens enhancer of mRNA decapping 3 (EDC3)	1	80153	"NM_001142444,NM_001142443,NM_025083"	"NP_001135916.1,NP_001135915.1,NP_079359.2"	ENSG00000179151	"ENST00000315127,ENST00000565602,ENST00000426797,ENST00000568176,ENST00000569606,ENST00000562174,ENST00000566219,ENST00000562974,ENST00000563009,ENST00000569561,ENST00000566243,ENST00000566828,ENST00000570138,ENST00000563292,ENST00000569007,ENST00000567813,ENST00000566119,ENST00000562047"	"ENSP00000320503,ENSP00000454885,ENSP00000401343,ENSP00000455580,ENSP00000455393,ENSP00000456805,ENSP00000457128,ENSP00000455503,ENSP00000455589,ENSP00000457523,ENSP00000455870,ENSP00000457170,ENSP00000454317,ENSP00000457156,ENSP00000455682"
EDC3	2.6423	0.319053	5.38807	9.31e-06	5.26094	5.53e-06	PH_hs_0022396	Homo sapiens enhancer of mRNA decapping 3 (EDC3)	1	80153	"NM_001142444,NM_001142443,NM_025083"	"NP_001135916.1,NP_001135915.1,NP_079359.2"	ENSG00000179151	"ENST00000315127,ENST00000565602,ENST00000426797,ENST00000568176,ENST00000569606,ENST00000562174,ENST00000566219,ENST00000562974,ENST00000563009,ENST00000569561,ENST00000566243,ENST00000566828,ENST00000570138,ENST00000563292,ENST00000569007,ENST00000567813,ENST00000566119,ENST00000562047"	"ENSP00000320503,ENSP00000454885,ENSP00000401343,ENSP00000455580,ENSP00000455393,ENSP00000456805,ENSP00000457128,ENSP00000455503,ENSP00000455589,ENSP00000457523,ENSP00000455870,ENSP00000457170,ENSP00000454317,ENSP00000457156,ENSP00000455682"
EDDM3A	-0.0820551	0.77981	0.0757633	0.552187	-0.475764	0.0259375	PH_hs_0015702	Homo sapiens epididymal protein 3A (EDDM3A)	1	10876	NM_006683	NP_006674.2	ENSG00000181562	"ENST00000326842,ENST00000618864"	"ENSP00000315098,ENSP00000479026"
EDNRA	-0.134661	0.327511	0.45284	0.0208887	0.0461009	0.777353	PH_hs_0023071	Homo sapiens endothelin receptor type A (EDNRA)	1	1909	"NR_045958,NM_001256283,NM_001166055,NM_001957"	"-,NP_001243212.1,NP_001159527.1,NP_001948.1"	ENSG00000151617	"ENST00000511804,ENST00000324300,ENST00000510697,ENST00000506066,ENST00000514245,ENST00000503721,ENST00000358556"	"ENSP00000425354,ENSP00000315011,ENSP00000427259,ENSP00000425281,ENSP00000351359"
EEA1	-0.262879	0.0526266	-0.0520602	0.574913	-0.0227453	0.928107	PH_hs_0047753	Homo sapiens early endosome antigen 1 (EEA1)	1	8411	NM_003566	NP_003557.2	ENSG00000102189	"ENST00000322349,ENST00000418984,ENST00000549790,ENST00000547833,ENST00000553019"	"ENSP00000317955,ENSP00000394312,ENSP00000446785,ENSP00000449682"
EEF1G	-0.278468	0.0404981	0.00280022	0.969917	-0.105373	0.294941	PH_hs_0029532	Homo sapiens eukaryotic translation elongation factor 1 gamma (EEF1G)	1	1937	NM_001404	NP_001395.1	ENSG00000254772	"ENST00000329251,ENST00000525340,ENST00000524420,ENST00000532986"	ENSP00000331901
EFCAB14	0.140588	0.404952	-0.427914	0.0259796	-0.287566	0.0731759	PH_hs_0023333	Homo sapiens EF-hand calcium binding domain 14 (EFCAB14)	1	9813	NM_014774	NP_055589.1	ENSG00000159658	"ENST00000371933,ENST00000479745,ENST00000487741,ENST00000481623,ENST00000459797,ENST00000484461"	"ENSP00000361001,ENSP00000474599"
EFCAB5	0.103264	0.79998	0.286751	0.0538687	0.265715	0.352072	PH_hs_0007184	Homo sapiens EF-hand calcium binding domain 5 (EFCAB5)	1	374786	NM_198529	NP_940931.2	ENSG00000176927	"ENST00000448319,ENST00000534836,ENST00000423598,ENST00000536908,ENST00000394835,ENST00000421238,ENST00000440741,ENST00000419434,ENST00000588978,ENST00000584826,ENST00000581617,ENST00000582953"	"ENSP00000400023,ENSP00000392831,ENSP00000440619,ENSP00000378312,ENSP00000393095,ENSP00000417009,ENSP00000465109"
EFCAB9	0.152334	0.313179	0.465349	0.124773	0.601704	0.0141164	PH_hs_0031722	Homo sapiens EF-hand calcium binding domain 9 (EFCAB9)	1	285588	NM_001171183	NP_001164654.1	ENSG00000214360	ENST00000398186	ENSP00000381247
EFHC1	-0.107094	0.753442	-0.432344	0.0225536	-0.264841	0.13804	PH_hs_0047643	Homo sapiens EF-hand domain (C-terminal)	1	114327	"NM_001172420,NM_018100,NR_033327"	"NP_001165891.1,NP_060570.2,-"	ENSG00000096093	"ENST00000480623,ENST00000371068,ENST00000491749,ENST00000481466,ENST00000538167"	"ENSP00000434498,ENSP00000360107,ENSP00000444521"
EFHD2	-0.377245	0.0496584	-0.312338	0.12405	-0.319098	0.070067	PH_hs_0029680	"Homo sapiens EF-hand domain family, member D2 (EFHD2)"	1	79180	NM_024329	NP_077305.2	ENSG00000142634	"ENST00000375980,ENST00000445566"	"ENSP00000365147,ENSP00000395153"
EFNA5	-0.635153	0.616093	0.52051	0.426621	0.886843	0.0332555	PH_hs_0048745	Homo sapiens ephrin-A5 (EFNA5)	1	1946	NM_001962	NP_001953.1	ENSG00000184349	"ENST00000333274,ENST00000510359,ENST00000509503,ENST00000504941,ENST00000505499,ENST00000611503"	"ENSP00000328777,ENSP00000426989,ENSP00000484681"
EFS	0.362214	0.048131	0.540493	0.107488	0.799282	0.00233559	PH_hs_0002159	Homo sapiens embryonal Fyn-associated substrate (EFS)	1	10278	"NM_032459,NM_005864"	"NP_115835.1,NP_005855.1"	ENSG00000100842	"ENST00000216733,ENST00000351354,ENST00000429593"	"ENSP00000216733,ENSP00000340607,ENSP00000416684"
EFS	0.362214	0.048131	0.540493	0.107488	0.799282	0.00233559	PH_hs_0002159	Homo sapiens embryonal Fyn-associated substrate (EFS)	1	10278	"NM_032459,NM_005864"	"NP_115835.1,NP_005855.1"	ENSG00000100842	"ENST00000216733,ENST00000351354,ENST00000429593"	"ENSP00000216733,ENSP00000340607,ENSP00000416684"
EHHADH	-0.225979	0.294728	-0.304273	0.0192146	-0.0828486	0.636134	PH_hs_0025237	"Homo sapiens enoyl-CoA, hydratase/3-hydroxyacyl CoA dehydrogenase (EHHADH)"	1	1962	"NM_001166415,NM_001966"	"NP_001159887.1,NP_001957.2"	ENSG00000113790	"ENST00000231887,ENST00000456310,ENST00000483104,ENST00000475987,ENST00000440662,ENST00000465178"	"ENSP00000231887,ENSP00000387746,ENSP00000396798"
EIF3B	-0.283326	0.150774	-0.122913	0.304513	-0.176458	0.0513061	PH_hs_0024167	"Homo sapiens eukaryotic translation initiation factor 3, subunit B (EIF3B)"	1	8662	"NM_001037283,NM_003751"	"NP_001032360.1,NP_003742.2"	ENSG00000106263	"ENST00000431643,ENST00000360876,ENST00000413917,ENST00000397011,ENST00000463229,ENST00000463026,ENST00000468250,ENST00000466199,ENST00000475415,ENST00000468611,ENST00000465670,ENST00000494658"	"ENSP00000408062,ENSP00000354125,ENSP00000407785,ENSP00000380206"
EIF5A2	0.222126	0.102096	0.556131	0.0218374	0.473802	0.0140219	PH_hs_0009926	Homo sapiens eukaryotic translation initiation factor 5A2 (EIF5A2)	1	56648	NM_020390	NP_065123.1	ENSG00000163577	"ENST00000295822,ENST00000460117,ENST00000487522,ENST00000474096,ENST00000474417"	"ENSP00000295822,ENSP00000418305,ENSP00000418370,ENSP00000417133"
EIF5A2	0.222126	0.102096	0.556131	0.0218374	0.473802	0.0140219	PH_hs_0009926	Homo sapiens eukaryotic translation initiation factor 5A2 (EIF5A2)	1	56648	NM_020390	NP_065123.1	ENSG00000163577	"ENST00000295822,ENST00000460117,ENST00000487522,ENST00000474096,ENST00000474417"	"ENSP00000295822,ENSP00000418305,ENSP00000418370,ENSP00000417133"
ELAC1	-0.0258038	0.933508	-0.340307	0.243475	-0.724809	0.0503627	PH_hs_0031211	Homo sapiens elaC ribonuclease Z 1 (ELAC1)	1	55520	NM_018696	NP_061166.1	ENSG00000141642	"ENST00000588577,ENST00000269466,ENST00000586966,ENST00000591429"	"ENSP00000467389,ENSP00000269466,ENSP00000464770"
ELANE	-0.514481	0.118899	-0.291674	0.0243416	0.181892	0.243137	PH_hs_0005576	"Homo sapiens elastase, neutrophil expressed (ELANE)"	1	1991	NM_001972	NP_001963.1	ENSG00000197561	"ENST00000590230,ENST00000263621"	"ENSP00000466090,ENSP00000263621"
ELF3	-0.246742	0.279432	-0.774054	0.0020852	-0.605913	0.0339189	PH_hs_0031289	"Homo sapiens E74-like factor 3 (ets domain transcription factor, epithelial-specific )"	1	1999	"NM_001114309,NM_004433"	"NP_001107781.1,NP_004424.3"	ENSG00000163435	"ENST00000359651,ENST00000367284,ENST00000367283,ENST00000495848,ENST00000490203,ENST00000498017,ENST00000446188,ENST00000470384,ENST00000479874,ENST00000475698"	"ENSP00000352673,ENSP00000356253,ENSP00000356252,ENSP00000405162"
ELF3	-0.246742	0.279432	-0.774054	0.0020852	-0.605913	0.0339189	PH_hs_0031289	"Homo sapiens E74-like factor 3 (ets domain transcription factor, epithelial-specific )"	1	1999	"NM_001114309,NM_004433"	"NP_001107781.1,NP_004424.3"	ENSG00000163435	"ENST00000359651,ENST00000367284,ENST00000367283,ENST00000495848,ENST00000490203,ENST00000498017,ENST00000446188,ENST00000470384,ENST00000479874,ENST00000475698"	"ENSP00000352673,ENSP00000356253,ENSP00000356252,ENSP00000405162"
ELK4	0.0468997	0.606164	-0.389671	0.0227988	-0.152944	0.238638	PH_hs_0060331	"Homo sapiens ELK4, ETS-domain protein (SRF accessory protein 1)"	1	2005	NM_001973	NP_001964.2	ENSG00000158711	"ENST00000616704,ENST00000617725,ENST00000357992,ENST00000289703,ENST00000468523"	"ENSP00000483628,ENSP00000350681,ENSP00000289703,ENSP00000484946"
ELMO3	-0.364431	0.0119794	-0.777626	0.00357149	-0.574155	0.121032	PH_hs_0024286	Homo sapiens engulfment and cell motility 3 (ELMO3)	1	79767	NM_024712	NP_078988.2	ENSG00000102890	"ENST00000360833,ENST00000393997,ENST00000571587,ENST00000477898,ENST00000571638"	"ENSP00000354077,ENSP00000377566,ENSP00000461166,ENSP00000458539"
ELMO3	-0.364431	0.0119794	-0.777626	0.00357149	-0.574155	0.121032	PH_hs_0024286	Homo sapiens engulfment and cell motility 3 (ELMO3)	1	79767	NM_024712	NP_078988.2	ENSG00000102890	"ENST00000360833,ENST00000393997,ENST00000571587,ENST00000477898,ENST00000571638"	"ENSP00000354077,ENSP00000377566,ENSP00000461166,ENSP00000458539"
ELOVL4	0.282518	0.023429	0.578408	0.00341201	0.692294	0.0029008	PH_hs_0005663	Homo sapiens ELOVL fatty acid elongase 4 (ELOVL4)	1	6785	NM_022726	NP_073563.1	ENSG00000118402	ENST00000369816	ENSP00000358831
ELOVL4	0.282518	0.023429	0.578408	0.00341201	0.692294	0.0029008	PH_hs_0005663	Homo sapiens ELOVL fatty acid elongase 4 (ELOVL4)	1	6785	NM_022726	NP_073563.1	ENSG00000118402	ENST00000369816	ENSP00000358831
ELOVL4	0.282518	0.023429	0.578408	0.00341201	0.692294	0.0029008	PH_hs_0005663	Homo sapiens ELOVL fatty acid elongase 4 (ELOVL4)	1	6785	NM_022726	NP_073563.1	ENSG00000118402	ENST00000369816	ENSP00000358831
EMX2	0.124749	0.292413	0.629706	0.0442646	0.519883	0.00257494	PH_hs_0011875	Homo sapiens empty spiracles homeobox 2 (EMX2)	1	2018	"NM_001165924,NM_004098"	"NP_001159396.1,NP_004089.1"	ENSG00000170370	"ENST00000553456,ENST00000616794,ENST00000546446,ENST00000442245"	"ENSP00000450962,ENSP00000480271,ENSP00000474874"
EMX2	0.124749	0.292413	0.629706	0.0442646	0.519883	0.00257494	PH_hs_0011875	Homo sapiens empty spiracles homeobox 2 (EMX2)	1	2018	"NM_001165924,NM_004098"	"NP_001159396.1,NP_004089.1"	ENSG00000170370	"ENST00000553456,ENST00000616794,ENST00000546446,ENST00000442245"	"ENSP00000450962,ENSP00000480271,ENSP00000474874"
ENO4	-0.356655	0.356266	-1.13085	0.109703	-1.80072	0.0492466	PH_hs_0046551	Homo sapiens enolase family member 4 (ENO4)	1	387712	NM_001242699	NP_001229628.1	ENSG00000188316	"ENST00000409522,ENST00000512864,ENST00000369207,ENST00000341276,ENST00000622726"	"ENSP00000387194,ENSP00000474839,ENSP00000358208,ENSP00000345555,ENSP00000482973"
ENPP3	0.522394	0.0733113	-0.00359458	0.994796	-0.579581	0.0305082	PH_hs_0013662	Homo sapiens ectonucleotide pyrophosphatase/phosphodiesterase 3 (ENPP3)	1	5169	NM_005021	NP_005012.2	ENSG00000154269	"ENST00000427707,ENST00000414305,ENST00000423831,ENST00000470930,ENST00000494023,ENST00000357639,ENST00000358229"	"ENSP00000415589,ENSP00000406261,ENSP00000408642,ENSP00000350265,ENSP00000350964"
ENTHD1	-0.504708	0.0627425	-0.368366	0.239398	-0.605316	0.0287913	PH_hs_0008973	Homo sapiens ENTH domain containing 1 (ENTHD1)	1	150350	NM_152512	NP_689725.2	ENSG00000176177	"ENST00000325157,ENST00000490326"	ENSP00000317431
ENTPD1	0.0466722	0.654973	-0.725524	0.00857668	-0.445638	0.0375991	PH_hs_0025943	Homo sapiens ectonucleoside triphosphate diphosphohydrolase 1 (ENTPD1)	1	953	"NM_001164179,NM_001776,NM_001164183,NM_001164182,NM_001164181,NM_001164178,NM_001098175"	"NP_001157651.1,NP_001767.3,NP_001157655.1,NP_001157654.1,NP_001157653.1,NP_001157650.1,NP_001091645.1"	ENSG00000138185	"ENST00000453258,ENST00000371205,ENST00000483213,ENST00000371206,ENST00000490659,ENST00000494070,ENST00000461927,ENST00000422161,ENST00000539125,ENST00000543964,ENST00000371207,ENST00000371203"	"ENSP00000390955,ENSP00000360248,ENSP00000440027,ENSP00000442968,ENSP00000360250,ENSP00000360246"
ENTPD1	0.0466722	0.654973	-0.725524	0.00857668	-0.445638	0.0375991	PH_hs_0025943	Homo sapiens ectonucleoside triphosphate diphosphohydrolase 1 (ENTPD1)	1	953	"NM_001164179,NM_001776,NM_001164183,NM_001164182,NM_001164181,NM_001164178,NM_001098175"	"NP_001157651.1,NP_001767.3,NP_001157655.1,NP_001157654.1,NP_001157653.1,NP_001157650.1,NP_001091645.1"	ENSG00000138185	"ENST00000453258,ENST00000371205,ENST00000483213,ENST00000371206,ENST00000490659,ENST00000494070,ENST00000461927,ENST00000422161,ENST00000539125,ENST00000543964,ENST00000371207,ENST00000371203"	"ENSP00000390955,ENSP00000360248,ENSP00000440027,ENSP00000442968,ENSP00000360250,ENSP00000360246"
[truncated: 3,259 more rows]
